# Supplementary material for: A genome-wide transcriptome and translatome analysis of Arabidopsis transposons identifies a unique and conserved genome expression strategy for Ty1/Copia retroelements
Source: HighWire-hosted journal article supplement (doi:10.1101/gr.220723.117), 2017-08-07
Supplement: Supplemental_Fig_S2.pdf [file Supplemental_Fig_S2.pdf]

A

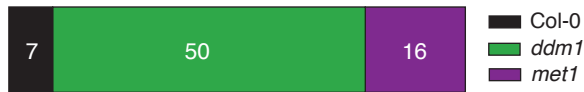

B

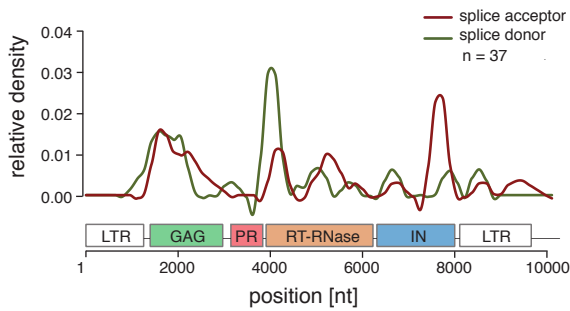

C

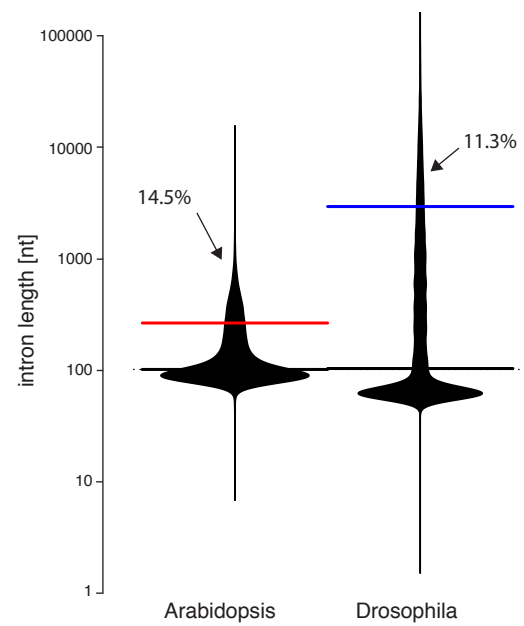

D

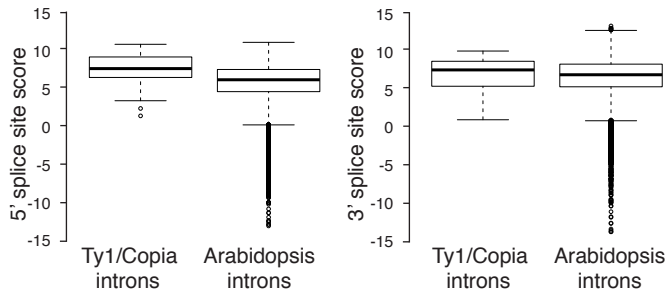

E

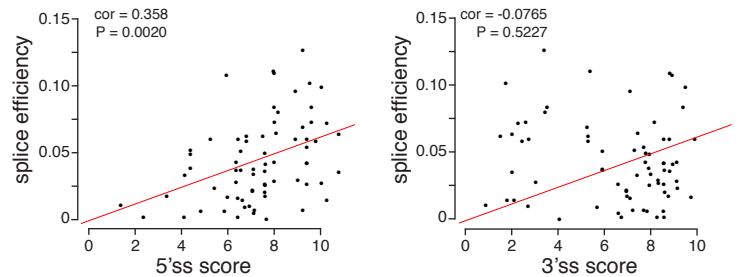

### Supplemental Figure S2. Splicing features *A.thaliana* transposons.

(A) Number of elements used for novel intron annotation from each genetic background. (B) Relative density plot of splice donor and splice acceptor sites of *Ty3/Gypsy* elements, as in Fig. 2B. (C) Intron length profile of annotated *A. thaliana* and *D. melanogaster* introns. Red and blue lines indicate the mean value of all *Arabidopsis Ty1/Copia* intron lengths and of the *Drosophila copia* element intron length, respectively. Percentages indicate the proportion of host genome's introns longer than the introns found in those transposable element. (D) 5' and 3' splice site scores of *Ty1/Copia* introns versus annotated *Arabidopsis* introns based on a position-specific score matrix (PSSM) of annotated *Arabidopsis* introns. (E) Splice site scores as established in (G) plotted against the splicing efficiency of the individual elements. Splicing efficiency is defined as the ratio between splice junction reads and intronic reads.
