# Supplementary material for: A genome-wide transcriptome and translatome analysis of Arabidopsis transposons identifies a unique and conserved genome expression strategy for Ty1/Copia retroelements
Source: HighWire-hosted journal article supplement (doi:10.1101/gr.220723.117), 2017-08-07
Supplement: Supplemental_Fig_S5.pdf [file Supplemental_Fig_S5.pdf]

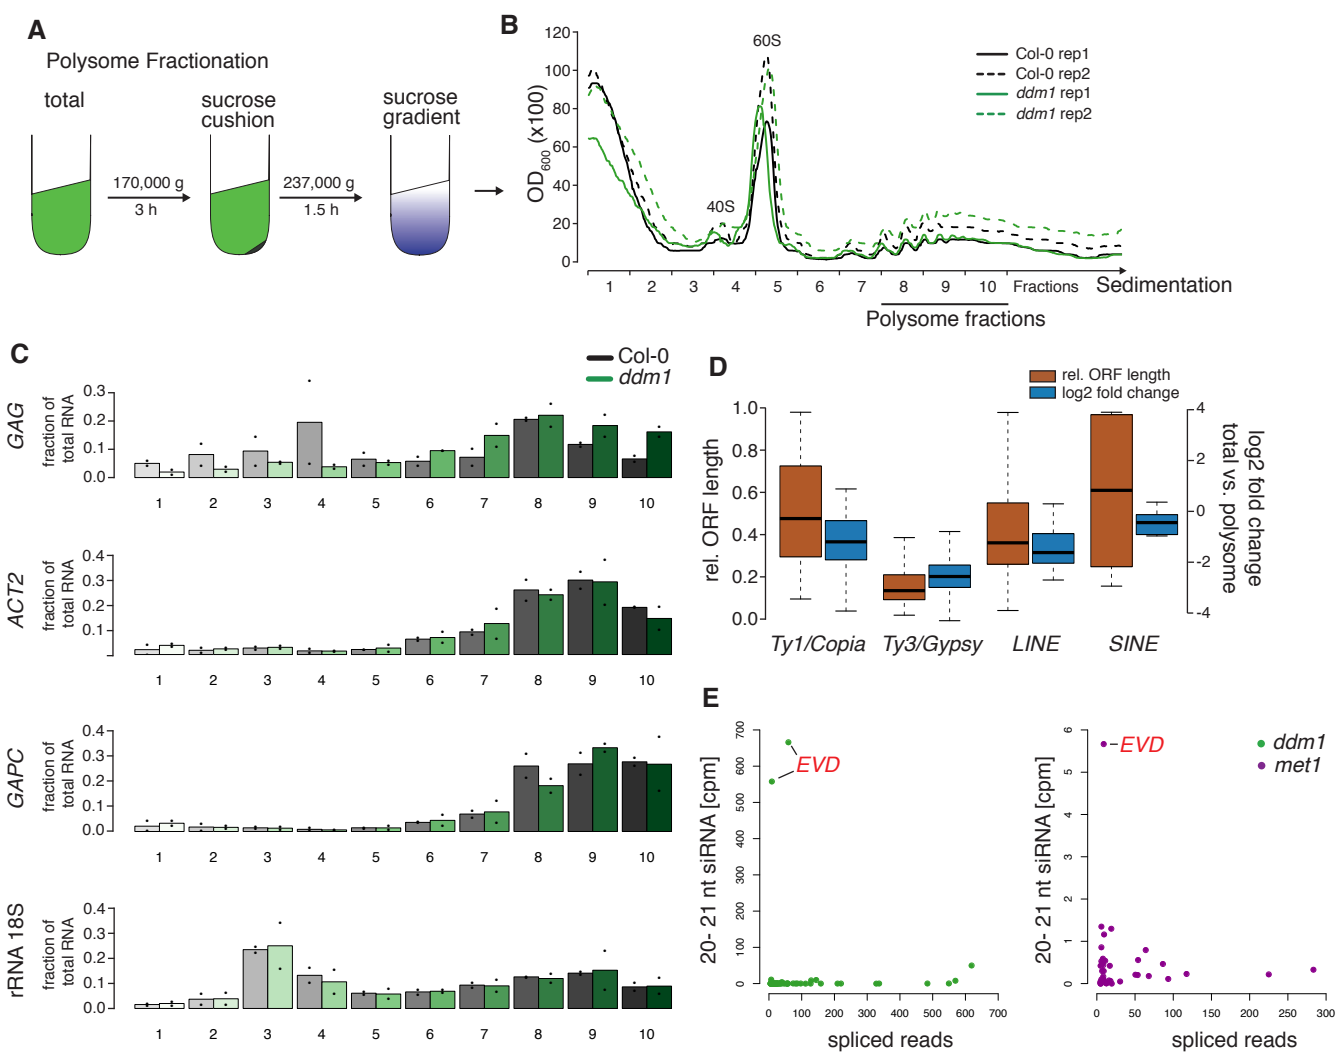

# **Supplemental Figure S5. Differential polysome association and siRNA production of de-repressed transposons.**

(A-B) Two-step polysome fractionation protocol yielding (B) resolvable monosomal and polyso-  
mal fractions. (OD600) optical density at 600nm. (C) qRT-PCR analysis of *EVD* *GAG*, *ACT2*  
(AT3G18780), *GAPC* (AT3G04120) mRNAs and of the 18S rRNA (AT3G41768) of the ten sepa-  
rated ribosomal fractions (fractions 4-5: monosomes; fractions 8-10: polysomes). Histograms  
display the mean of two independent replicates indicated by black dots. The values are  
displayed as the ratio between RNA accumulation found within each individual fraction and total  
RNA levels across all fractions. (D) ORF-length-dependent polysome association of various  
retroelement superfamilies in *A. thaliana*. (E) Comparison between levels of spliced reads,  
reflecting shGAG mRNA abundance, and 20-21-nt siRNAs of upregulated TEs in *ddm1* (green)  
and *met1* (magenta) backgrounds.
