# Supplementary material for: A genome-wide transcriptome and translatome analysis of Arabidopsis transposons identifies a unique and conserved genome expression strategy for Ty1/Copia retroelements
Source: HighWire-hosted journal article supplement (doi:10.1101/gr.220723.117), 2017-08-07
Supplement: Supplemental_Fig_S6.pdf [file Supplemental_Fig_S6.pdf]

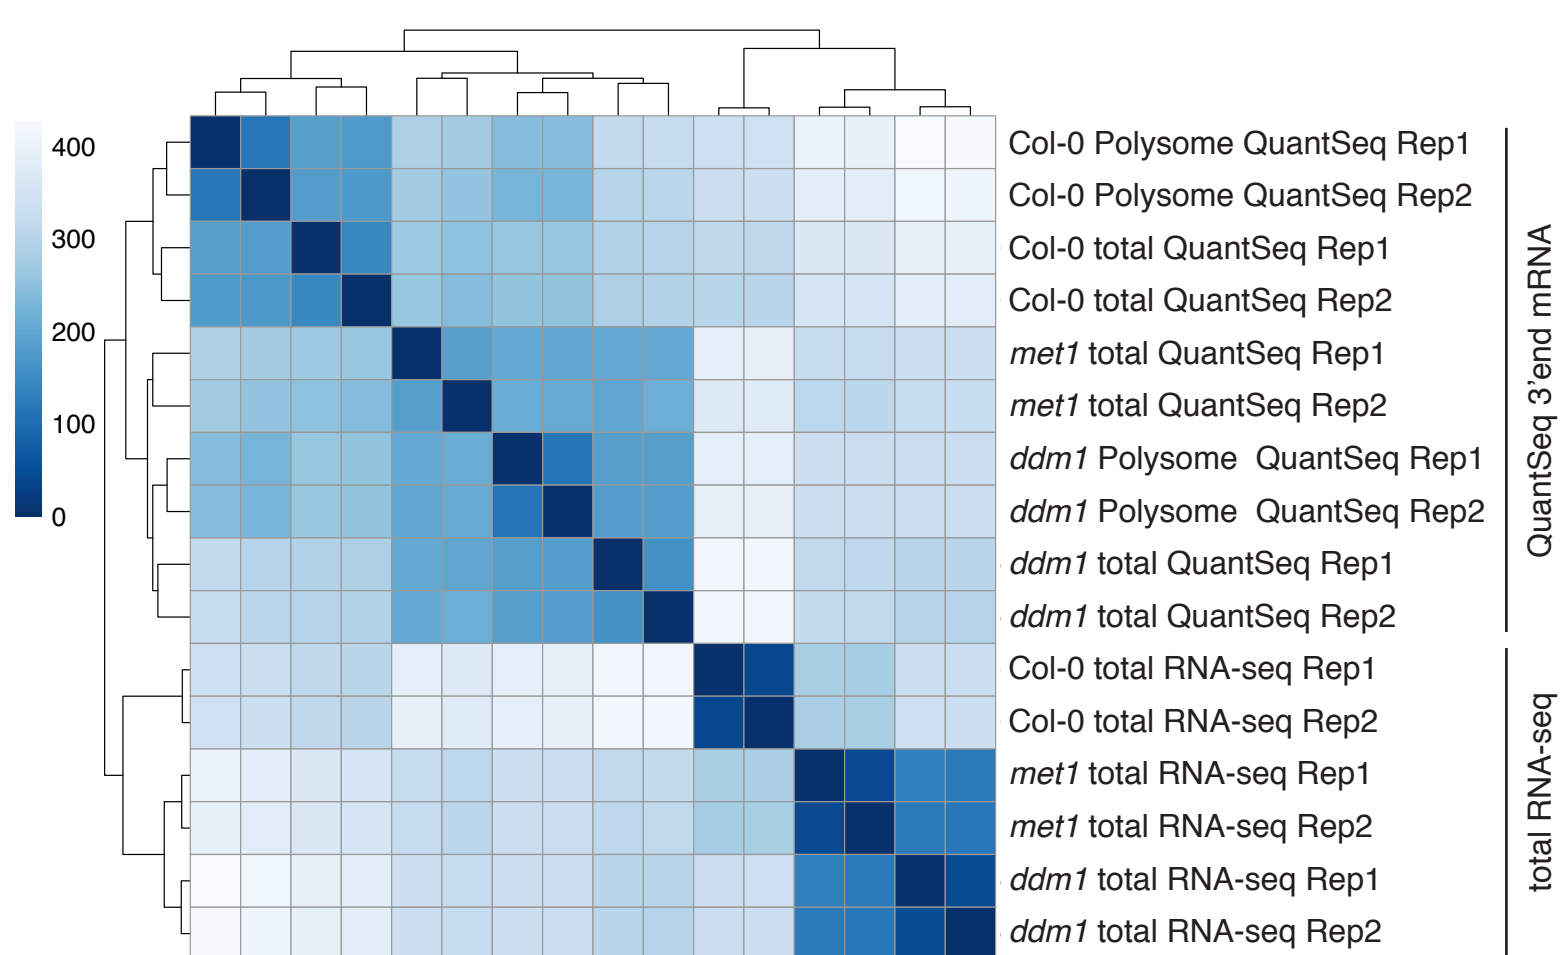

**Supplemental Figure S6. Heat map representation of the entire RNAseq dataset used in this study**  
 Euclidean distance matrix of log-transformed expression level data from individual RNA-seq replicates. Note that the lowest distances are found between biological replicates and that two main clusters (total RNA-seq and QuantSeq 3'end mRNA) are defined according to the library preparation methods.
