# Supplementary material for: A genome-wide transcriptome and translatome analysis of Arabidopsis transposons identifies a unique and conserved genome expression strategy for Ty1/Copia retroelements
Source: HighWire-hosted journal article supplement (doi:10.1101/gr.220723.117), 2017-08-07
Supplement: Supplemental_Table_S1.xlsx [file Supplemental_Table_S1.xlsx]

## Sheet: ddm1 vs. Col-0
TE.ID	TE.Superfamily	TE.Family	baseMean	log2FoldChange	Adjusted.P-value
AT1TE41580	LTR/Copia	ATCOPIA93	4086.85	8.73316	0
AT1TE42210	DNA/En-Spm	ATENSPM3	4943.14	8.31739	0
AT1TE42890	DNA/En-Spm	ATENSPM5	12839.1	10.1563	0
AT1TE44450	DNA/En-Spm	ATENSPM4	17773.4	11.2146	0
AT1TE45020	DNA/En-Spm	ATENSPM5	17147.8	11.1825	0
AT1TE49260	LTR/Gypsy	ATHILA6B	41801.9	12.1769	0
AT1TE49850	LTR/Gypsy	ATHILA2	20601.8	11.6089	0
AT1TE51735	LTR/Gypsy	ATHILA2	19405.5	11.1482	0
AT1TE52105	LTR/Gypsy	ATHILA2	20528.5	11.5242	0
AT1TE52205	DNA/En-Spm	ATENSPM1	18593.4	11.0798	0
AT1TE52590	DNA/En-Spm	ATENSPM2	8992.64	10.3388	0
AT1TE60180	DNA/En-Spm	ATENSPM9	11394.5	10.3946	0
AT1TE62470	DNA/En-Spm	ATENSPM5	14517.8	10.654	0
AT1TE65060	DNA/En-Spm	ATENSPM4	19638	11.1835	0
AT2TE15880	LTR/Gypsy	ATHILA6A	10971.5	10.2817	0
AT2TE20220	DNA/En-Spm	ATENSPM5	16080.2	10.9236	0
AT2TE20255	DNA/En-Spm	ATENSPM5	13669.1	10.8941	0
AT2TE22040	DNA/En-Spm	ATENSPM1	34618	11.6985	0
AT2TE22520	LTR/Gypsy	ATHILA2	15145.8	11.1251	0
AT2TE63800	DNA/En-Spm	ATENSPM1	35557.3	11.7473	0
AT3TE48120	DNA/En-Spm	ATENSPM6	12744.9	10.5308	0
AT3TE50655	LTR/Gypsy	ATHILA2	11983.1	10.8168	0
AT3TE51460	DNA/En-Spm	ATENSPM2	11950.9	10.5386	0
AT3TE53995	DNA/En-Spm	ATENSPM2	15941.8	10.9537	0
AT3TE55395	LTR/Gypsy	ATHILA6A	12965.7	10.9793	0
AT3TE60280	DNA/En-Spm	ATENSPM4	22342.8	11.3671	0
AT3TE62685	LTR/Gypsy	ATHILA0_I	9385.26	11.0595	0
AT3TE63540	LTR/Gypsy	ATHILA2	24637.4	11.5619	0
AT3TE69350	DNA/En-Spm	ATENSPM9	10844.2	10.3183	0
AT3TE76225	LTR/Copia	ATCOPIA52	3572.48	7.75126	0
AT4TE05190	DNA/En-Spm	ATENSPM1	33655.4	11.6233	0
AT4TE09085	DNA/En-Spm	ATENSPM5	14152.7	10.6508	0
AT4TE14295	LTR/Gypsy	ATHILA2	11058.4	11.0803	0
AT4TE15030	LTR/Gypsy	ATHILA6A	12934.2	10.7992	0
AT4TE16565	LTR/Gypsy	ATHILA2	19600.9	11.4191	0
AT4TE16900	LTR/Gypsy	ATHILA	11545.7	11.4422	0
AT4TE16945	LTR/Gypsy	ATHILA	11364.1	10.7399	0
AT4TE17360	LTR/Gypsy	ATHILA	13507.1	11.2588	0
AT4TE17470	LTR/Gypsy	ATHILA6A	21404.7	11.447	0
AT4TE20400	LTR/Gypsy	ATHILA2	13017.1	11.0143	0
AT4TE21055	LTR/Gypsy	ATHILA0_I	10385.4	6.69357	0
AT5TE20395	LTR/Copia	ATCOPIA93	5933.93	9.2815	0
AT5TE41070	LTR/Gypsy	ATHILA6A	61418.9	12.1559	0
AT5TE42135	LTR/Gypsy	ATHILA6A	59110.7	12.1758	0
AT5TE42190	LTR/Gypsy	ATHILA6B	41851.9	12.0066	0
AT5TE42420	LTR/Gypsy	ATHILA2	32790.8	12.0174	0
AT5TE42440	LTR/Gypsy	ATHILA6A	54671.2	12.1734	0
AT5TE42470	LTR/Gypsy	ATHILA6A	61625.8	12.4875	0
AT5TE42710	LTR/Gypsy	ATHILA6A	52336.4	12.1391	0
AT5TE42855	LTR/Gypsy	ATHILA6B	22832.6	11.4768	0
AT5TE43260	LTR/Gypsy	ATHILA6A	18242.1	11.3125	0
AT5TE47115	LTR/Gypsy	ATHILA6B	16375.3	11.2262	0
AT5TE47200	LTR/Gypsy	ATHILA2	18974.9	11.1868	0
AT4TE14540	LTR/Gypsy	ATHILA2	12168	11.0388	1.82345e-302
AT4TE10350	DNA/En-Spm	ATENSPM1	14501.9	10.9727	1.07498e-301
AT5TE65540	DNA/En-Spm	ATENSPM5	14057.9	11.0635	2.89354e-301
AT2TE16825	LTR/Gypsy	ATHILA	8934.94	11.0901	2.07256e-298
AT1TE48730	LTR/Gypsy	ATHILA3	8063.8	10.8894	1.71201e-297
AT2TE20205	DNA/En-Spm	ATENSPM3	30561.3	11.5576	3.948e-296
AT2TE24525	DNA/En-Spm	ATENSPM1A	6803.55	9.29263	1.17713e-295
AT3TE50760	LTR/Gypsy	ATHILA2	9110.63	10.4477	1.41386e-292
AT1TE52125	LTR/Gypsy	ATHILA2	10412	10.7425	1.47589e-290
AT4TE67560	DNA/MuDR	VANDAL6	4200.55	8.13064	2.32307e-289
AT4TE15670	LTR/Gypsy	ATHILA0_I	5396.17	8.89157	1.92279e-288
AT1TE48775	LTR/Gypsy	ATHILA3	7701.37	10.7465	3.30116e-287
AT1TE44630	DNA/En-Spm	ATENSPM2	7790.66	10.9277	1.92896e-286
AT1TE38940	DNA/En-Spm	ATENSPM1A	11556.6	10.6344	2.87726e-286
AT5TE43980	LTR/Gypsy	ATHILA6A	10349.8	10.7873	5.05289e-284
AT5TE44770	LTR/Gypsy	ATHILA2	9408.2	10.6229	5.24336e-283
AT3TE50595	LTR/Gypsy	ATHILA2	9569.63	10.7768	2.6092e-274
AT5TE43665	LTR/Gypsy	ATHILA6A	10411.1	10.7233	1.6689e-273
AT2TE23705	DNA/En-Spm	ATENSPM4	10915.2	10.6839	1.29664e-272
AT1TE49300	LTR/Gypsy	ATHILA2	8362.05	10.4583	2.85101e-272
AT5TE46215	LTR/Gypsy	ATHILA6A	7806.04	9.99757	1.66746e-270
AT3TE53985	DNA/En-Spm	ATENSPM2	10429.2	10.5305	2.93869e-270
AT3TE50025	DNA/En-Spm	ATENSPM5	11569.6	10.325	8.50882e-270
AT5TE51685	DNA/En-Spm	ATENSPM1A	10021.5	10.4976	9.75323e-267
AT1TE52110	LTR/Gypsy	ATHILA2	9422.58	10.7763	1.29848e-266
AT1TE54480	LTR/Gypsy	ATHILA5	7923.76	10.4549	6.80963e-265
AT4TE19915	LTR/Gypsy	ATHILA2	8527.55	10.6587	5.53602e-264
AT4TE15440	LTR/Gypsy	ATHILA3	7695.46	10.6964	3.17706e-263
AT4TE15945	LTR/Gypsy	ATHILA2	9283.93	10.8761	5.89721e-263
AT5TE36830	LTR/Gypsy	ATGP2N	4282.21	6.51837	7.87011e-263
AT1TE50860	LTR/Gypsy	ATHILA6A	8899.93	10.5986	1.90506e-262
AT2TE17600	DNA/En-Spm	ATENSPM6	9049.64	10.4201	3.45618e-259
AT3TE53215	LTR/Gypsy	ATHILA2	6984.67	10.6244	4.64032e-257
AT5TE39425	DNA/En-Spm	ATENSPM11	5348.35	9.53266	5.87973e-257
AT4TE16400	LTR/Gypsy	ATHILA2	8084.68	10.5076	2.18817e-255
AT2TE11350	LTR/Gypsy	ATHILA2	6781.65	10.1895	2.2907e-254
AT3TE51380	DNA/En-Spm	ATENSPM6	7582.09	10.2651	2.69783e-253
AT4TE08465	LTR/Gypsy	ATHILA3	7353.74	10.8354	2.65866e-252
AT4TE08475	LTR/Gypsy	ATHILA2	7337.72	10.8326	3.79107e-252
AT3TE51325	LTR/Gypsy	ATHILA2	8656.34	10.5118	4.40308e-252
AT5TE42355	LTR/Gypsy	ATHILA2	7967.24	10.4733	5.52052e-252
AT3TE57150	LTR/Gypsy	ATHILA6A	7153.65	10.287	5.95623e-252
AT5TE42965	LTR/Gypsy	ATHILA2	6842.5	10.0919	1.7302e-251
AT4TE15255	LTR/Gypsy	ATHILA2	6632.9	10.3711	4.09767e-250
AT1TE46665	LTR/Gypsy	ATHILA3	5552.01	10.4021	3.14043e-249
AT5TE46210	LTR/Gypsy	ATHILA8B	7331.91	10.3631	3.20617e-247
AT3TE60525	LTR/Gypsy	ATHILA2	8027.02	10.5048	7.51691e-247
AT1TE55320	DNA/En-Spm	ATENSPM6	7004.62	9.87658	2.95609e-246
AT4TE16080	LTR/Gypsy	ATHILA3	6844.2	10.6953	3.12651e-246
AT3TE55340	LTR/Gypsy	ATHILA2	7119.36	10.4362	8.66648e-246
AT1TE42225	DNA/En-Spm	ATENSPM5	6789.06	10.46	2.80265e-245
AT1TE41230	DNA/En-Spm	ATENSPM1A	9379.62	10.5555	7.54176e-245
AT3TE52305	LTR/Gypsy	ATHILA3	5615.03	10.3494	9.97533e-245
AT2TE21710	DNA/En-Spm	ATENSPM2	6591.1	10.2872	1.08736e-243
AT4TE16570	LTR/Gypsy	ATHILA6B	6547.33	10.0969	1.34328e-243
AT2TE20940	LTR/Gypsy	ATHILA3	3512.54	8.85707	1.78968e-243
AT3TE60460	LTR/Gypsy	ATHILA6A	7771.44	10.481	3.72341e-243
AT1TE51065	LTR/Gypsy	ATHILA2	5933.6	9.97714	1.08994e-239
AT3TE58020	LTR/Gypsy	ATHILA2	6460	10.3342	1.3948e-239
AT1TE46765	LTR/Gypsy	ATHILA2	6938.17	10.4787	5.18681e-239
AT3TE50675	DNA/En-Spm	ATENSPM5	7823.02	10.2258	2.9936e-238
AT4TE25050	DNA/MuDR	VANDAL6	3749.15	8.55036	1.7738e-236
AT5TE43815	LTR/Gypsy	ATHILA2	5825.83	10.1313	9.79354e-236
AT3TE62025	LTR/Gypsy	ATHILA2	5896.48	10.0092	1.95409e-232
AT5TE39830	DNA/En-Spm	ATENSPM5	6705.94	10.0098	3.07864e-231
AT1TE45135	LTR/Gypsy	ATHILA2	5632.89	10.0844	7.68777e-231
AT4TE18245	LTR/Gypsy	ATHILA	5389.39	10.2088	8.9386e-231
AT4TE18060	LTR/Gypsy	ATHILA6A	5733.95	10.1424	2.52091e-229
AT3TE57935	DNA/MuDR	VANDAL7	1681.97	6.99401	2.9984e-229
AT1TE48035	DNA/En-Spm	ATENSPM5	6583.01	10.0426	7.46567e-227
AT2TE06955	DNA/MuDR	VANDAL21	2397.19	6.33152	3.71306e-224
AT2TE12030	DNA/En-Spm	ATENSPM6	6060.25	9.88091	1.16227e-223
AT2TE24385	LTR/Gypsy	ATHILA6A	5400.22	9.54989	4.37483e-222
AT2TE11920	DNA/En-Spm	ATENSPM6	6132.84	9.86589	1.48151e-221
AT3TE61525	DNA/En-Spm	ATENSPM4	6364.79	10.4029	2.21732e-221
AT5TE41865	LTR/Gypsy	ATHILA6A	5341.58	9.8811	8.81619e-221
AT3TE60550	DNA/En-Spm	ATENSPM6	5872.22	9.85575	1.8124e-220
AT1TE49955	DNA/En-Spm	ATENSPM5	4262.54	9.09733	1.11199e-219
AT1TE27295	DNA/MuDR	VANDAL6	3205.89	8.20181	7.45813e-218
AT3TE64435	LTR/Copia	ATCOPIA11	5895.69	10.232	9.30343e-214
AT2TE43165	DNA/MuDR	VANDAL6	2883.08	8.17271	2.49916e-212
AT4TE14035	LTR/Gypsy	ATHILA6A	4811.05	10.0076	2.77982e-212
AT1TE46575	LTR/Gypsy	ATHILA2	4976.25	9.90478	7.63176e-212
AT5TE44355	LTR/Gypsy	ATHILA2	5276.39	10.1274	9.53568e-212
AT3TE53970	LTR/Gypsy	ATHILA	3662.97	9.7451	9.19691e-211
AT4TE20745	LTR/Gypsy	ATHILA2	4119.82	9.84081	1.09353e-210
AT5TE42660	LTR/Gypsy	ATHILA2	3934.27	10.0886	2.80189e-209
AT3TE50650	DNA/En-Spm	ATENSPM5	5464.15	9.85898	2.57101e-208
AT1TE54760	DNA/En-Spm	ATENSPM1A	3573.43	9.68766	4.20329e-208
AT2TE16575	LTR/Gypsy	ATHILA2	4213.61	9.98301	3.04691e-207
AT1TE46755	LTR/Gypsy	ATHILA2	4415.69	10.0938	1.17648e-206
AT3TE67445	DNA/MuDR	VANDAL7	3408.07	9.38288	1.34847e-205
AT5TE40425	DNA/En-Spm	ATENSPM1	5070.6	9.87023	3.23891e-204
AT4TE19135	DNA/En-Spm	ATENSPM3	4422.96	9.61047	6.84978e-204
AT2TE17095	RC/Helitron	HELITRONY2	5170.69	9.78532	1.36972e-203
AT2TE17110	DNA/En-Spm	ATENSPM6	5152.58	9.78109	2.38381e-203
AT3TE55025	LTR/Gypsy	ATHILA2	4399.41	9.88109	7.83814e-203
AT2TE12555	LTR/Gypsy	ATHILA3	3172.38	9.70735	5.55539e-201
AT2TE16865	LTR/Gypsy	ATHILA2	3884.3	9.7189	8.66501e-201
AT5TE43385	DNA/En-Spm	ATENSPM9	4325.55	9.39268	8.39664e-200
AT1TE45200	LTR/Gypsy	ATHILA2	3939.68	9.68475	8.52525e-198
AT5TE47160	LTR/Gypsy	ATHILA3	3308.25	10.0453	9.26655e-198
AT2TE22505	LTR/Gypsy	ATHILA2	4281.91	9.727	1.51999e-197
AT1TE44125	DNA/MuDR	VANDAL6	2826.71	8.29126	2.75891e-197
AT4TE29830	LTR/Copia	ATCOPIA22	1604.27	6.70514	2.80739e-197
AT4TE18330	LTR/Gypsy	ATHILA3	3270	10.0472	3.07704e-197
AT4TE18435	DNA/En-Spm	ATENSPM6	4305.11	9.86222	3.99723e-197
AT5TE43255	LTR/Gypsy	ATHILA2	3647.76	9.81671	4.44705e-197
AT1TE48830	DNA/En-Spm	ATENSPM11	3064.06	9.81508	4.3699e-196
AT1TE52985	LTR/Gypsy	ATHILA0_I	2985.63	9.82286	1.63324e-195
AT1TE36570	DNA/En-Spm	ATENSPM3	2040.64	7.70965	7.82533e-195
AT3TE50125	LTR/Copia	ATCOPIA43	2578.76	9.80294	8.2154e-195
AT5TE39315	DNA/En-Spm	ATENSPM2	3888.44	9.80435	1.01798e-194
AT3TE54005	DNA/En-Spm	ATENSPM1A	4460.61	9.53947	1.29867e-194
AT4TE15875	DNA/En-Spm	ATENSPM9	4912.15	9.62105	5.60896e-194
AT4TE17510	LTR/Gypsy	ATHILA2	3677.17	9.91585	6.80953e-194
AT3TE57050	LTR/Gypsy	ATHILA	2971.49	10.0464	6.91247e-194
AT1TE39515	DNA/En-Spm	ATENSPM10	3275.58	9.3799	9.82554e-194
AT3TE58895	LTR/Gypsy	ATHILA0_I	3472	10.0326	2.01638e-193
AT4TE17240	LTR/Gypsy	ATHILA2	3947.03	9.70081	5.81096e-193
AT4TE19150	LTR/Gypsy	ATHILA2	3861.28	9.41608	3.40316e-192
AT4TE16910	LTR/Gypsy	ATHILA6A	2678.5	9.60075	3.50488e-191
AT1TE59745	LTR/Copia	ATCOPIA49	3963.84	9.02596	9.2856e-191
AT3TE59620	LTR/Gypsy	ATHILA2	3837.61	9.75338	3.40057e-190
AT4TE17205	DNA/En-Spm	ATENSPM9	4246.46	9.56685	3.73471e-190
AT2TE42810	DNA/MuDR	VANDAL21	3482.74	9.19873	9.91948e-190
AT3TE57780	DNA/MuDR	VANDAL7	2135.36	5.47097	2.56303e-188
AT3TE16035	LTR/Gypsy	ATGP3	2821.62	10.0924	2.57112e-188
AT3TE51735	DNA/En-Spm	ATENSPM3	3952.61	9.6934	3.42593e-188
AT1TE47365	LTR/Gypsy	ATHILA3	2928.66	10.091	4.71546e-188
AT3TE57395	DNA/En-Spm	ATENSPM6	3861.76	9.41487	1.70796e-187
AT1TE47145	LTR/Gypsy	ATHILA3	2929.02	10.0875	1.95223e-187
AT3TE55365	LTR/Gypsy	ATHILA6A	3435.61	9.70384	1.15657e-185
AT5TE49915	LTR/Copia	ATCOPIA56	3117.93	10.5534	1.63454e-185
AT5TE36940	DNA/En-Spm	ATENSPM5	4160.69	9.51137	4.25505e-185
AT5TE40575	LTR/Gypsy	ATHILA2	4013.93	9.54439	9.16027e-185
AT3TE70635	DNA/MuDR	VANDAL6	2298.58	8.13479	3.26984e-183
AT1TE52950	DNA/En-Spm	ATENSPM6	3965.27	9.47723	4.39393e-183
AT1TE47280	LTR/Gypsy	ATHILA0_I	7453.7	9.9705	4.56105e-183
AT3TE53690	LTR/Gypsy	ATHILA	2831.02	10.3045	5.50575e-183
AT5TE64600	DNA/MuDR	VANDAL6	2352.44	7.98945	3.92663e-181
AT1TE45790	LTR/Gypsy	ATHILA6A	3657.79	9.56943	2.05179e-180
AT3TE47975	DNA/En-Spm	ATENSPM11	2980.93	9.29187	1.25234e-179
AT5TE23185	LTR/Copia	ATCOPIA89	1871.32	7.35989	5.71931e-178
AT2TE16310	DNA/En-Spm	ATENSPM7	3128.17	9.3542	5.88588e-178
AT4TE16085	DNA/En-Spm	ATENSPM11	3052.2	9.43805	7.54379e-178
AT1TE46265	LTR/Gypsy	ATHILA6B	3189.44	9.42382	2.11455e-177
AT2TE22335	DNA/En-Spm	ATENSPM1A	3687.13	9.50114	2.33261e-177
AT5TE55555	LTR/Gypsy	ATHILA7	1972.66	7.13525	2.65446e-177
AT2TE16230	LTR/Gypsy	ATHILA2	3476.29	9.36542	8.54415e-177
AT1TE45315	LTR/Gypsy	ATGP3	2142.88	9.70586	2.79691e-174
AT2TE35840	LTR/Copia	ATCOPIA69	1994.35	8.74272	5.84678e-174
AT2TE07745	DNA/En-Spm	ATENSPM9	3086.36	9.64578	8.77543e-174
AT4TE20800	DNA/En-Spm	ATENSPM6	3344.67	9.14837	2.13598e-173
AT5TE47500	LTR/Gypsy	ATHILA2	2655.24	9.25591	9.8647e-173
AT3TE55355	LTR/Gypsy	ATHILA2	2538.46	9.06465	1.49924e-172
AT2TE20260	LTR/Gypsy	ATHILA2	3066.06	9.46998	2.02711e-172
AT3TE63935	Unassigned	SADHU	1380.64	6.10434	2.75508e-172
AT3TE56700	LTR/Gypsy	ATHILA	3068.99	9.94771	4.1597e-172
AT1TE47605	LTR/Gypsy	ATHILA3	2287.56	9.91548	5.46421e-171
AT5TE43915	LTR/Gypsy	ATHILA8B	2944.05	9.48059	1.03926e-170
AT5TE42900	LTR/Gypsy	ATHILA2	2821.28	9.10784	1.03681e-169
AT5TE37965	DNA/En-Spm	ATENSPM6	3008.73	9.02812	2.41157e-169
AT4TE15665	LTR/Gypsy	ATHILA4C	5405.18	8.29632	1.51302e-168
AT2TE11985	LTR/Gypsy	ATHILA8A	2042.94	9.04079	2.19685e-168
AT4TE19925	LTR/Gypsy	ATHILA5	3132.76	9.16913	2.79702e-168
AT5TE43190	LTR/Gypsy	ATHILA2	2744.98	8.74454	2.84998e-168
AT2TE13440	LTR/Gypsy	ATHILA5	2377.98	9.54977	3.45855e-168
AT1TE47105	LTR/Gypsy	ATHILA2	2549.43	9.0837	5.47108e-168
AT5TE83215	LTR/Copia	ATCOPIA49	2685.15	8.4467	2.55338e-167
AT4TE08995	LTR/Gypsy	ATHILA2	2362.04	9.16087	3.84043e-166
AT1TE45175	LTR/Gypsy	ATHILA6A	3294.65	9.37287	6.38756e-166
AT3TE62215	LTR/Gypsy	ATHILA5	2242.36	9.17083	1.67974e-165
AT1TE44455	DNA/En-Spm	ATENSPM2	3300.59	9.16364	3.50835e-165
AT2TE19005	LTR/Gypsy	ATHILA0_I	2279.08	9.1879	4.69374e-165
AT5TE41975	LTR/Copia	ATCOPIA66	3125.55	9.51436	2.85545e-164
AT5TE41980	DNA/En-Spm	ATENSPM10	3121.71	9.5118	4.28105e-164
AT1TE47500	LTR/Gypsy	ATHILA0_I	7452.56	10.0393	4.34296e-164
AT5TE41870	DNA/En-Spm	ATENSPM9	2640.74	9.12049	9.6158e-163
AT5TE38995	LTR/Copia	ATCOPIA68	2051.09	9.683	1.23353e-162
AT4TE10210	DNA/MuDR	VANDAL7	2266.75	9.31985	6.67317e-162
AT2TE11805	DNA/En-Spm	ATENSPM1A	2054.05	9.07443	8.56129e-162
AT1TE47750	LTR/Gypsy	ATHILA2	2487.71	9.23067	9.3402e-162
AT2TE12020	LTR/Gypsy	ATHILA	1847.6	8.92238	1.14261e-161
AT1TE46690	LTR/Gypsy	ATHILA7	2049.84	9.26907	1.20792e-161
AT4TE21170	LTR/Gypsy	ATHILA3	2058.89	9.1077	7.98127e-161
AT5TE41795	DNA/En-Spm	ATENSPM9	2692.61	9.05326	2.95933e-160
AT4TE13035	DNA/En-Spm	ATENSPM9	2888.75	9.01768	4.96391e-160
AT1TE51000	LTR/Gypsy	ATHILA2	2463.6	9.23822	1.69733e-159
AT3TE50940	LTR/Gypsy	ATHILA3	2007.67	9.29037	1.69733e-159
AT4TE18315	LTR/Gypsy	ATHILA3	1868.05	9.03959	2.74728e-159
AT1TE28830	Unassigned	Unassigned	1794.45	8.199	3.89246e-159
AT4TE16380	LTR/Gypsy	ATHILA2	1864.46	7.38084	3.97533e-159
AT5TE43615	LTR/Gypsy	ATHILA3	2220.13	9.24461	5.60089e-158
AT5TE44730	LTR/Gypsy	ATHILA3	2210.39	9.26275	5.92618e-158
AT2TE26380	DNA/En-Spm	ATENSPM3	2149.84	9.7382	1.09887e-157
AT2TE18450	DNA/En-Spm	ATENSPM1A	2573.57	8.88082	1.1457e-157
AT5TE53465	DNA/MuDR	VANDAL6	1756.13	7.67187	2.73396e-157
AT2TE11145	LTR/Gypsy	ATHILA2	2327.61	9.03195	1.08461e-156
AT3TE54705	LTR/Gypsy	ATHILA6A	2174.08	9.113	1.29039e-156
AT5TE43975	LTR/Gypsy	ATHILA6A	2474.59	9.12979	2.62989e-156
AT2TE23970	SINE	ATSINE2A	2830.11	9.09451	2.81774e-156
AT1TE50875	LTR/Gypsy	ATHILA2	2402.41	8.99525	3.05251e-155
AT3TE53580	DNA/MuDR	VANDAL21	2508.07	8.87753	3.38548e-155
AT3TE60560	DNA/En-Spm	ATENSPM6	2627.67	9.01879	3.46653e-155
AT1TE49740	DNA/En-Spm	ATENSPM7	1643.9	9.2783	1.00863e-154
AT2TE18415	DNA/En-Spm	ATENSPM3	4550.81	9.81558	1.35601e-154
AT1TE51820	DNA/En-Spm	ATENSPM3	1851.24	9.15772	4.16662e-154
AT1TE46735	LTR/Gypsy	ATHILA	1979.53	9.26627	9.78437e-154
AT4TE13485	LTR/Gypsy	ATHILA2	2289.32	9.12695	1.53602e-153
AT2TE18885	LTR/Gypsy	ATHILA2	2311.12	9.10582	2.36879e-153
AT5TE38340	DNA/En-Spm	ATENSPM3	1701.92	8.76268	2.44889e-153
AT3TE54690	DNA/En-Spm	ATENSPM5	2231.23	8.90959	7.60993e-153
AT3TE59100	LTR/Gypsy	ATHILA2	2358.61	9.1544	1.00093e-152
AT2TE13350	LTR/Gypsy	ATHILA	2342.96	8.95369	2.11151e-152
AT2TE17725	LTR/Gypsy	ATHILA0_I	1913.73	8.76073	2.19606e-152
AT1TE66380	LTR/Copia	ATCOPIA48	3786.05	9.54623	3.20422e-152
AT3TE60285	DNA/En-Spm	ATENSPM2	2509.52	9.06587	3.52095e-152
AT1TE47595	LTR/Gypsy	ATHILA5	1819.01	9.48449	3.89272e-151
AT4TE18445	LTR/Gypsy	ATHILA	2027.61	9.10765	1.32707e-150
AT1TE48765	LTR/Gypsy	ATHILA	1529.26	8.80209	1.45454e-150
AT1TE52925	DNA/HAT	ATHAT3	1548.26	9.38555	2.71256e-148
AT4TE18705	LTR/Gypsy	ATHILA6A	2207.21	8.83462	1.99827e-147
AT5TE43805	LTR/Gypsy	ATHILA8B	1824.84	8.91079	3.30019e-147
AT2TE19200	DNA/En-Spm	ATENSPM7	1972.8	9.13798	2.46927e-146
AT3TE50670	LTR/Gypsy	ATHILA2	2116.19	8.78753	5.56967e-146
AT1TE70815	LINE?	TSCL	2546.74	8.66664	6.74584e-146
AT1TE44380	LTR/Copia	ATCOPIA89	1770.42	8.88879	1.03897e-145
AT2TE18410	LTR/Gypsy	ATHILA3	1072.87	7.46814	2.18097e-145
AT3TE48135	DNA/En-Spm	ATENSPM11	1919.1	8.82151	2.35541e-145
AT3TE57310	DNA/En-Spm	ATENSPM11	1326	7.9854	5.05037e-145
AT4TE17115	LTR/Gypsy	ATHILA6A	1951.24	8.54147	1.57796e-144
AT3TE48070	DNA/MuDR	VANDAL21	2170.61	8.6221	2.36655e-144
AT1TE48735	LTR/Gypsy	ATHILA3	1593.38	9.06482	4.79208e-144
AT5TE41420	DNA/En-Spm	ATENSPM10	1599.91	8.25512	3.35932e-143
AT1TE47135	LTR/Gypsy	ATHILA5	1566.21	9.36982	3.49148e-143
AT1TE47355	LTR/Gypsy	ATHILA5	1566.02	9.36964	3.53771e-143
AT4TE18670	LTR/Gypsy	ATHILA6A	2068.77	8.87149	3.53771e-143
AT2TE09640	DNA/En-Spm	ATENSPM7	1803.04	8.59769	6.61579e-142
AT2TE11890	DNA/En-Spm	ATENSPM1A	1639.56	8.9505	1.48992e-141
AT4TE20125	DNA/En-Spm	ATENSPM6	1993.77	8.44009	2.89823e-141
AT1TE51155	LTR/Gypsy	ATHILA2	1749.11	8.73561	3.47763e-140
AT2TE38900	LTR/Copia	ATCOPIA76	1357.02	9.05578	6.0604e-140
AT1TE51700	LTR/Gypsy	ATGP1	1356.54	8.96219	2.13862e-139
AT1TE51705	LTR/Gypsy	ATHILA	1354.38	8.96202	2.2725e-139
AT5TE42265	LTR/Gypsy	ATHILA	1353.83	8.87743	4.75972e-139
AT5TE46840	LTR/Gypsy	ATGP10	1442.63	9.10074	1.60192e-138
AT1TE45710	LTR/Gypsy	ATHILA2	1637.27	8.48352	5.04613e-138
AT1TE43040	LTR/Gypsy	ATGP7	1551.76	8.39466	5.9395e-138
AT2TE10980	LTR/Gypsy	ATHILA	1332.52	8.78599	2.20279e-137
AT3TE52320	LTR/Gypsy	ATHILA5	1513.26	8.79431	3.18464e-135
AT5TE34980	Unassigned	Unassigned	1069.45	6.31416	9.76072e-135
AT3TE59155	LTR/Gypsy	ATHILA2	1659.48	8.68885	1.14936e-134
AT2TE16860	LTR/Gypsy	ATHILA2	1672.6	8.59424	1.15356e-134
AT3TE61530	LTR/Gypsy	ATHILA3	1268.2	9.22574	2.31594e-134
AT2TE17655	LTR/Gypsy	ATHILA	1292.15	8.77321	7.58508e-134
AT2TE17660	LTR/Gypsy	ATHILA	1292.15	8.77321	7.58508e-134
AT5TE36945	DNA/En-Spm	ATENSPM6	1935.02	8.5333	9.76549e-134
AT3TE57445	LTR/Gypsy	ATHILA6A	1611.92	8.71914	2.35732e-133
AT2TE24735	DNA/MuDR	VANDAL7	1402.37	8.30725	3.23569e-133
AT1TE48020	LTR/Gypsy	ATHILA6A	1453.21	8.69864	3.37744e-133
AT2TE28325	LTR/Copia	ATCOPIA38B	1353.59	8.16235	1.12722e-132
AT5TE63610	LTR/Copia	ENDOVIR1	1452.33	7.75986	1.19584e-132
AT1TE41575	LTR/Copia	ATCOPIA93	1067.17	8.62343	1.54256e-132
AT1TE86360	LTR/Copia	ATCOPIA11	1062.04	8.60295	1.5996e-132
AT2TE21505	LTR/Gypsy	ATHILA2	1133.87	8.35803	3.54526e-132
AT1TE48745	LTR/Gypsy	ATHILA	1223.93	8.81749	1.77002e-131
AT5TE46220	DNA/Harbinger	ATIS112A	1449.02	8.03812	1.87453e-131
AT1TE53390	LTR/Gypsy	ATGP6	1855.79	8.57559	1.16849e-130
AT4TE25590	LTR/Copia	ATCOPIA49	1355.39	8.28158	1.34146e-130
AT5TE43855	DNA/En-Spm	ATENSPM3	1770.49	9.35036	1.97372e-130
AT1TE50560	LTR/Gypsy	ATGP5	1661.68	8.6363	2.6202e-130
AT1TE50115	LTR/Gypsy	ATGP5	1660.47	8.63391	4.2749e-130
AT2TE17625	LTR/Gypsy	ATHILA6A	1229.02	8.72729	7.51805e-130
AT4TE50435	LTR/Copia	ATCOPIA47	1695.14	9.41054	1.11773e-129
AT2TE19435	LTR/Gypsy	ATHILA5	1671.18	8.55197	6.22365e-129
AT1TE52990	LTR/Gypsy	ATHILA5	1231.68	8.76573	8.6114e-129
AT2TE20330	LTR/Gypsy	ATHILA5	1303.24	8.60823	8.79722e-129
AT2TE04130	LTR/Copia	ATCOPIA56	1228.25	9.40183	1.12617e-128
AT4TE10675	DNA/En-Spm	ATENSPM11	1528.17	8.27093	1.25083e-128
AT3TE22200	DNA/MuDR	VANDAL17	1066.03	4.92983	1.30695e-128
AT3TE55360	LTR/Gypsy	ATHILA6B	1525.01	8.59792	1.57843e-128
AT3TE50600	LTR/Gypsy	ATHILA6A	1494.43	8.34586	3.84102e-128
AT5TE43940	DNA/En-Spm	ATENSPM6	1725.83	8.50758	5.84042e-128
AT3TE51660	LTR/Gypsy	ATHILA2	1753.43	8.34789	1.98935e-127
AT1TE49675	DNA/En-Spm	ATENSPM6	1308.25	8.64616	6.82767e-127
AT3TE53045	DNA/En-Spm	ATENSPM10	2027.42	8.97456	1.95974e-126
AT4TE25065	DNA/MuDR	VANDAL7	1228.81	8.39703	4.05566e-125
AT1TE48835	LTR/Gypsy	ATHILA6B	1327.08	8.34073	6.87217e-123
AT3TE60425	LTR/Gypsy	ATHILA3	2011.83	8.53897	8.08859e-123
AT3TE60200	LTR/Gypsy	ATHILA3	1020.35	8.17349	8.09393e-123
AT3TE62450	DNA/MuDR	VANDAL22	1098.73	8.7641	8.21576e-123
AT3TE54735	LTR/Gypsy	ATHILA2	1011.62	7.25049	1.86746e-122
AT2TE19535	LTR/Gypsy	ATHILA	1089.67	8.61936	2.09829e-122
AT4TE15825	LTR/Gypsy	ATGP10	2409.98	8.78507	7.31789e-122
AT1TE53635	DNA/MuDR	VANDAL8	1105.74	7.29954	3.08127e-121
AT1TE46405	LTR/Copia	ATCOPIA66	962.702	8.83169	3.21823e-121
AT4TE07420	DNA/En-Spm	ATENSPM4	1524.72	8.61513	3.74644e-121
AT5TE43625	LTR/Gypsy	ATHILA5	1241.43	8.31822	1.31225e-120
AT2TE19240	DNA/En-Spm	ATENSPM7	1123.54	8.74622	1.63462e-120
AT2TE26370	DNA/En-Spm	ATENSPM7	955.555	8.65661	2.29191e-120
AT4TE15870	DNA/En-Spm	ATENSPM6	1535.54	8.21406	4.44956e-120
AT5TE40565	DNA/En-Spm	ATENSPM6	1381.82	8.3638	5.57784e-120
AT1TE33490	LINE/L1	TA11	1032.79	7.89527	9.22092e-120
AT2TE21105	LTR/Gypsy	ATHILA0_I	1025.31	8.32411	1.43848e-119
AT5TE40275	LTR/Gypsy	ATHILA	1085.9	8.81203	1.54691e-119
AT5TE61735	LTR/Copia	ATCOPIA15	1354.98	8.06613	8.02064e-119
AT2TE11925	DNA/En-Spm	ATENSPM5	1462.42	8.21634	1.07909e-118
AT1TE35305	DNA/MuDR	VANDAL8	1477.04	8.30462	2.38509e-118
AT2TE11355	LTR/Gypsy	ATHILA	1030.76	8.76222	2.78016e-118
AT3TE62455	LTR/Copia	ATCOPIA33	1095.45	9.01614	6.86685e-118
AT1TE47540	LTR/Gypsy	ATHILA4C	1057.24	8.06631	6.92998e-118
AT3TE54710	LTR/Gypsy	ATHILA0_I	1305.36	8.66312	8.34884e-118
AT2TE38905	LTR/Gypsy	ATGP2N	785.941	7.33104	9.90767e-118
AT4TE19780	LTR/Gypsy	ATHILA2	1165.5	8.28868	1.65946e-117
AT3TE56720	LTR/Gypsy	ATHILA	995.226	8.99465	2.19963e-117
AT5TE42015	LTR/Gypsy	ATHILA3	1026.98	8.45085	1.10302e-116
AT2TE23845	LTR/Copia	ATCOPIA49	962.238	9.09335	3.46771e-116
AT5TE40515	LTR/Gypsy	ATHILA2	1255.52	8.32902	4.10296e-116
AT5TE42330	LTR/Gypsy	ATHILA5	1304.71	8.15965	9.7329e-116
AT5TE44235	DNA/MuDR	VANDAL6	1046.36	7.69077	1.07512e-115
AT3TE57345	LTR/Gypsy	ATHILA6A	1110.54	8.36781	1.47978e-115
AT4TE13315	LTR/Gypsy	ATHILA2	1241.3	8.38507	2.68597e-115
AT3TE62940	LTR/Copia	ATCOPIA43	1002.72	9.24328	5.62714e-115
AT1TE36035	LTR/Copia	ATCOPIA51	942.184	8.87159	5.8984e-115
AT2TE27645	LINE/L1	TA11	1176.29	8.2462	1.02585e-113
AT1TE51055	LTR/Gypsy	ATHILA6A	1254.2	8.27792	1.07176e-113
AT2TE26230	LTR/Copia	ATCOPIA9	1147.46	8.16639	3.38922e-113
AT4TE20535	DNA/En-Spm	ATENSPM7	1015.13	8.32101	5.13909e-113
AT4TE13505	LTR/Gypsy	ATHILA2	1092.44	8.32406	1.46477e-112
AT5TE43325	DNA/En-Spm	ATENSPM7	1290.01	8.44768	1.80686e-112
AT1TE48660	LTR/Gypsy	ATHILA6B	1120.55	8.20957	4.05694e-112
AT4TE20120	DNA/En-Spm	ATENSPM5	1354.78	8.15274	6.93786e-112
AT4TE15420	LTR/Gypsy	ATHILA2	1052.39	7.94426	1.00136e-111
AT5TE39320	DNA/En-Spm	ATENSPM2	1133.03	8.39904	1.58937e-111
AT3TE60430	LTR/Gypsy	ATGP10	1540.35	8.098	1.79486e-111
AT5TE43240	LTR/Gypsy	ATHILA2	1070.77	7.96866	2.37823e-111
AT4TE23410	LTR/Gypsy	ATGP2N	1605.25	6.14719	2.57782e-111
AT4TE20245	LTR/Gypsy	ATHILA8B	1225.7	7.91904	2.93468e-111
AT4TE16390	LTR/Gypsy	ATLANTYS2	2465.66	7.62643	1.39213e-110
AT2TE06620	DNA/En-Spm	ATENSPM6	1405.96	8.22964	3.5363e-109
AT2TE16030	LTR/Copia	ATCOPIA33	779.655	8.28379	8.32076e-109
AT1TE43975	LTR/Copia	ATCOPIA43	806.203	8.47017	8.41281e-109
AT2TE16235	LTR/Gypsy	ATLANTYS3	1328.39	8.11354	3.74445e-108
AT3TE91200	LTR/Copia	ATCOPIA51	789.222	8.62302	3.71428e-107
AT2TE17590	LTR/Gypsy	ATHILA8B	1077.99	8.19266	6.39984e-107
AT3TE59450	LTR/Gypsy	ATHILA8B	914.5	8.38262	9.26186e-107
AT3TE52310	LTR/Gypsy	ATHILA5	893.459	8.15865	1.21126e-106
AT4TE21190	LTR/Gypsy	ATHILA5	948.276	8.15	4.75423e-106
AT5TE49755	DNA/MuDR	VANDAL21	1160.39	7.88316	4.79441e-106
AT3TE59105	LTR/Gypsy	ATHILA6A	1071.85	8.11074	5.27214e-106
AT1TE74860	DNA/Harbinger	HARBINGER	844.254	7.18548	6.50544e-106
AT5TE47100	LTR/Copia	ATCOPIA15	829.043	8.17169	7.17651e-106
AT4TE09565	DNA/En-Spm	ATENSPM2	1071.34	8.00806	8.82447e-106
AT5TE38285	LINE/L1	TA11	900.689	7.87298	1.62454e-105
AT2TE11960	DNA/HAT	ATHAT3	1076.84	8.02563	1.92736e-105
AT2TE11560	LTR/Gypsy	ATHILA6A	997.441	7.85722	2.69749e-105
AT2TE11300	LINE/L1	ATLINE1_6	763.282	8.35989	6.90721e-105
AT3TE53990	DNA/En-Spm	ATENSPM2	1180.94	7.96163	4.27603e-104
AT5TE41425	LTR/Gypsy	ATHILA2	956.647	7.9019	7.60225e-104
AT2TE08135	DNA/MuDR	VANDAL6	908.363	7.29575	1.21953e-103
AT2TE19610	LTR/Gypsy	ATGP10	1090.75	8.15243	2.04402e-103
AT4TE18470	DNA/MuDR	VANDAL8	828.911	6.72529	2.61549e-103
AT4TE23345	DNA/MuDR	VANDAL21	1103.69	7.92606	4.29917e-103
AT4TE44080	LTR/Copia	ATCOPIA1	1009.51	7.09214	4.53471e-103
AT1TE47550	LTR/Gypsy	ATHILA2	877.194	7.70597	6.03556e-103
AT3TE60410	DNA/MuDR	VANDAL20	888.1	7.83855	6.7907e-103
AT1TE47140	LTR/Gypsy	ATHILA5	809.909	8.14759	1.61157e-102
AT1TE47360	LTR/Gypsy	ATHILA5	809.726	8.14729	1.63801e-102
AT2TE17565	LTR/Gypsy	ATHILA8B	919.446	8.13413	1.71443e-102
AT2TE15490	LTR/Gypsy	ATHILA	760.191	8.04333	7.2748e-102
AT5TE45060	LTR/Gypsy	ATGP10	652.782	7.74846	6.16732e-101
AT4TE09055	LTR/Gypsy	ATHILA3	854.256	8.10245	6.89283e-101
AT5TE44740	LTR/Gypsy	ATHILA5	822.222	7.86713	1.27544e-100
AT2TE37050	LTR/Copia	ATCOPIA72	736.874	7.51935	2.3197e-100
AT2TE11540	LTR/Gypsy	ATGP2	681.362	7.78458	2.41307e-100
AT5TE79225	LTR/Copia	ATCOPIA22	720.099	7.78601	2.52185e-100
AT4TE54750	DNA/Harbinger	HARBINGER	592.455	7.76321	2.68382e-100
AT4TE09845	DNA/Harbinger	ATIS112A	836.898	5.73278	2.89386e-100
AT1TE44905	LTR/Gypsy	ATHILA2	912.924	7.81381	4.97806e-100
AT5TE42360	LTR/Gypsy	ATHILA5	677.432	8.16313	1.22333e-99
AT5TE42365	LTR/Gypsy	ATHILA	677.038	8.16219	1.32466e-99
AT3TE56040	LTR/Gypsy	ATGP3	779.192	8.18919	2.80572e-99
AT3TE51820	LTR/Gypsy	ATGP3	738.294	9.0042	2.17827e-98
AT3TE54695	LTR/Gypsy	ATHILA2	741.562	7.81986	8.89066e-98
AT3TE60310	Unassigned	SADHU	797.128	5.18184	3.55119e-97
AT2TE16820	LTR/Gypsy	ATHILA	631.137	7.96943	8.08408e-97
AT5TE46040	LTR/Gypsy	ATHILA5	710.337	8.21772	9.21648e-97
AT1TE48670	DNA/En-Spm	ATENSPM11	634.753	8.11543	1.2791e-96
AT2TE19595	DNA/En-Spm	ATENSPM2	933.775	7.79916	4.81531e-96
AT5TE44735	LTR/Gypsy	ATHILA3	786.693	7.86142	5.10437e-96
AT1TE53060	LTR/Gypsy	ATHILA4	704.482	7.95955	9.11654e-96
AT1TE52200	DNA/MuDR	VANDAL4	19803.9	7.76183	1.74885e-95
AT1TE70490	LTR/Copia	ATCOPIA22	783.938	7.8651	1.78969e-95
AT4TE18630	LTR/Gypsy	ATHILA0_I	717.2	7.86941	3.72364e-95
AT5TE42680	LTR/Gypsy	ATHILA6A	788.567	7.85912	4.38536e-95
AT2TE15415	LTR/Gypsy	ATGP10	666.217	8.16568	4.70573e-95
AT1TE53660	DNA/MuDR	VANDAL8	798.217	7.18405	1.08831e-94
AT4TE19470	LTR/Copia	ATCOPIA53	588.472	5.98415	1.87029e-94
AT5TE39140	DNA/Harbinger	ATIS112A	728.939	5.20825	3.68087e-94
AT4TE18720	LTR/Gypsy	ATHILA3	749.854	7.1662	5.60989e-94
AT5TE41135	LTR/Gypsy	ATHILA4C	623.366	8.53922	6.56717e-94
AT4TE18675	LTR/Gypsy	ATHILA6A	825.94	7.7254	8.56393e-94
AT3TE50165	LTR/Gypsy	ATHILA2	788.845	7.79413	8.8415e-94
AT5TE39325	DNA/En-Spm	ATENSPM2	791.155	7.72538	1.34309e-93
AT5TE41270	LTR/Gypsy	ATHILA2	679.174	7.85686	1.45549e-93
AT2TE05755	DNA/MuDR	VANDAL21	904.303	7.41684	1.52828e-93
AT1TE46330	DNA/Harbinger	ATIS112A	668.991	7.83439	3.07623e-93
AT4TE12355	LTR/Copia	ATCOPIA56	628.981	8.58142	3.96299e-93
AT3TE57355	LTR/Gypsy	ATHILA2	705.333	7.83745	6.39268e-93
AT4TE25100	LTR/Copia	ATCOPIA69	552.04	7.99845	1.84323e-92
AT5TE36230	LTR/Copia	ATCOPIA86	624.829	8.67693	2.45677e-92
AT3TE62395	Unassigned	Unassigned	754.436	7.55898	2.94938e-92
AT1TE54925	DNA/MuDR	ATMU10	908.669	7.65586	3.26832e-92
AT2TE21480	LTR/Gypsy	ATHILA2	583.742	7.92978	9.35403e-92
AT4TE16745	LINE/L1	ATLINE1_6	871.56	7.74668	1.12301e-91
AT4TE22095	LTR/Copia	ATCOPIA55	593.549	8.38894	2.18549e-91
AT3TE54700	LTR/Gypsy	ATHILA2	652.475	7.65974	2.54808e-91
AT3TE57275	DNA/En-Spm	ATENSPM10	590.234	8.25641	4.55895e-91
AT3TE59490	LTR/Gypsy	ATGP10	659.696	8.10908	7.74237e-91
AT3TE57995	LTR/Gypsy	ATHILA2	745.367	7.67808	1.07976e-90
AT3TE61535	LTR/Gypsy	ATHILA0_I	650.941	7.7832	1.26736e-90
AT4TE32185	SINE	ATSINE2A	655.378	5.6742	2.14362e-90
AT3TE57685	LTR/Gypsy	ATHILA	539.992	7.59095	3.22188e-90
AT3TE57920	LTR/Gypsy	ATHILA2	746.448	7.67412	3.99614e-90
AT5TE40195	LTR/Gypsy	ATHILA2	764.535	7.77269	6.38599e-90
AT4TE19920	LTR/Gypsy	ATHILA2	654.361	7.70276	8.50589e-90
AT4TE14130	LTR/Gypsy	ATHILA3	704.78	7.78846	9.83074e-90
AT2TE26680	DNA/En-Spm	ATENSPM10	903.274	7.36447	1.36637e-89
AT2TE16390	DNA/En-Spm	ATENSPM10	532.278	8.11561	1.72697e-89
AT3TE51250	DNA/En-Spm	ATENSPM9	820.932	7.4388	2.20592e-89
AT5TE41415	DNA/En-Spm	ATENSPM10	656.435	7.50897	2.22068e-89
AT3TE57785	LTR/Gypsy	ATHILA6A	795.592	7.59128	6.16813e-89
AT2TE19075	DNA/En-Spm	ATENSPM6	870.966	7.4891	9.98867e-89
AT4TE53965	LTR/Copia	ATCOPIA22	613.731	7.68086	1.0089e-88
AT1TE51645	LTR/Gypsy	ATHILA2	716.336	7.38059	1.77497e-88
AT3TE48150	DNA/En-Spm	ATENSPM11	626.517	7.39851	2.02064e-88
AT3TE91180	LTR/Copia	ATCOPIA51	523.319	8.05239	2.6391e-88
AT3TE59610	LTR/Gypsy	ATHILA6A	673.445	7.64902	3.78893e-88
AT3TE49090	DNA/MuDR	ATMU5	726.896	7.10312	5.2423e-88
AT4TE15270	LTR/Gypsy	ATHILA2	686.033	7.50021	5.46953e-88
AT5TE34730	DNA/MuDR	VANDAL8	712.021	7.17023	5.6529e-88
AT2TE13360	LTR/Gypsy	ATHILA6A	774.251	7.55125	5.87595e-88
AT1TE18410	LTR/Copia	ATCOPIA89	498.975	7.85601	1.30711e-87
AT3TE51330	LTR/Gypsy	ATGP5	849.252	7.70022	1.91475e-87
AT4TE09995	DNA/HAT	ATHAT3	737.785	7.53772	2.69372e-87
AT5TE48820	LINE/L1	ATLINE1_6	795.403	7.53955	2.77972e-87
AT3TE55370	LTR/Gypsy	ATHILA2	605.159	7.55264	3.91268e-87
AT1TE46235	DNA/En-Spm	ATENSPM9	639.863	7.50695	7.49918e-87
AT4TE18755	LTR/Gypsy	ATHILA2	644.584	7.17692	1.18008e-86
AT2TE48990	DNA/Harbinger	HARBINGER	821.852	7.45469	1.45805e-86
AT5TE69650	Unassigned	Unassigned	743.218	7.20439	1.73339e-86
AT4TE19905	LTR/Gypsy	ATHILA2	625.259	7.9605	2.3286e-86
AT3TE55410	LTR/Gypsy	ATHILA2	651.03	7.34638	2.52705e-86
AT3TE50020	DNA/En-Spm	ATENSPM5	1313.84	7.27364	3.35651e-86
AT2TE17730	LTR/Gypsy	ATHILA6A	909.697	7.71377	4.32997e-86
AT1TE49845	LTR/Gypsy	ATHILA6B	694.809	7.58422	5.12297e-86
AT1TE46805	LTR/Gypsy	ATHILA3	500.328	7.44161	6.8747e-86
AT3TE58900	DNA	ATDNA12T3A	606.999	7.79688	8.47936e-86
AT1TE51990	LTR/Gypsy	ATHILA6A	694.631	7.57678	1.00856e-85
AT2TE21450	LTR/Gypsy	ATHILA2	484.795	7.2423	2.339e-85
AT4TE15750	LTR/Gypsy	ATHILA3	590.329	7.82643	3.84627e-85
AT4TE18485	LTR/Gypsy	ATHILA3	499.46	8.06676	2.1365e-84
AT2TE16580	LTR/Gypsy	ATHILA2	715.67	7.49469	2.96944e-84
AT1TE82600	DNA/MuDR	ATMU2	716.131	7.14205	3.12706e-84
AT3TE42075	LTR/Copia	ATCOPIA49	501.404	8.07881	1.66335e-83
AT3TE58630	LTR/Gypsy	ATHILA3	518.229	7.61757	6.75403e-83
AT3TE56710	LTR/Gypsy	ATHILA6A	1363.44	8.5566	8.37236e-83
AT1TE29570	DNA/Harbinger	HARBINGER	559.897	5.04701	8.50342e-83
AT3TE60510	LTR/Gypsy	ATHILA2	598.227	7.35832	8.95928e-83
AT1TE64830	DNA/MuDR	ATMU2	679.839	7.17912	1.65653e-82
AT1TE46385	LTR/Gypsy	ATHILA2	481.655	7.84456	1.74861e-82
AT4TE18615	LTR/Gypsy	ATHILA5	588.961	7.52994	1.90559e-82
AT1TE46305	LTR/Gypsy	ATHILA0_I	497.293	7.74383	1.10466e-81
AT2TE21110	LTR/Gypsy	ATHILA8B	486.969	7.46812	1.25741e-81
AT1TE48025	LTR/Gypsy	ATHILA6A	558.783	7.50712	1.76886e-81
AT2TE17985	LTR/Copia	ATCOPIA41	579.711	7.43781	2.00471e-81
AT1TE47570	LTR/Gypsy	ATHILA2	565.908	7.32818	2.45537e-81
AT1TE51045	LTR/Gypsy	ATHILA6B	619.096	7.3112	3.80495e-81
AT3TE50570	DNA/MuDR	VANDAL3	488.308	7.44766	4.16933e-81
AT1TE45855	LINE/L1	ATLINE2	569.952	7.32823	4.56543e-81
AT3TE55475	LTR/Gypsy	ATGP3	658.704	7.82926	5.96492e-81
AT2TE09735	DNA/HAT	ATHAT2	614.036	7.26645	7.1934e-81
AT1TE53090	LTR/Copia	ENDOVIR1	494.517	7.80278	9.29749e-81
AT4TE16575	LTR/Gypsy	ATGP7	565.803	7.23831	1.96233e-80
AT1TE51105	DNA/En-Spm	ATENSPM7	511.266	7.80837	2.54132e-80
AT2TE21445	LTR/Gypsy	ATHILA6A	466.316	7.74962	3.13056e-80
AT1TE45385	DNA/En-Spm	ATENSPM7	1022.64	7.82284	3.2379e-80
AT5TE44415	DNA/Harbinger	HARBINGER	587.44	7.19996	4.47563e-80
AT5TE42010	DNA/En-Spm	ATENSPM6	501.108	7.52673	6.32343e-80
AT4TE13990	LTR/Gypsy	ATHILA6A	544.363	7.40599	7.44383e-80
AT2TE18455	LTR/Gypsy	ATHILA0_I	743.43	7.26262	7.92261e-80
AT4TE18740	LTR/Gypsy	ATHILA2	540.931	7.17457	3.91806e-79
AT5TE46860	LTR/Gypsy	ATGP10	457.921	7.65948	2.76893e-78
AT3TE61555	LTR/Gypsy	ATHILA6A	498.424	7.43557	2.77627e-78
AT4TE18775	LTR/Gypsy	ATHILA6A	442.314	7.92426	2.8462e-78
AT4TE16990	DNA/MuDR	VANDAL21	604.522	7.31392	4.77212e-78
AT5TE43315	LTR/Gypsy	ATHILA	651.085	7.53703	5.85487e-78
AT3TE57645	DNA/MuDR	VANDAL8	551.761	7.3464	5.9862e-78
AT4TE17480	LTR/Gypsy	ATHILA	432.639	7.56767	1.17099e-77
AT2TE20925	LTR/Gypsy	ATHILA5	495.869	7.03454	3.10964e-77
AT2TE12470	LTR/Copia	ATCOPIA68	431.177	7.55133	3.24155e-77
AT5TE42255	DNA/En-Spm	ATENSPM6	396.096	7.69493	3.60536e-77
AT5TE44070	LTR/Gypsy	ATHILA2	519.853	7.20291	5.48974e-77
AT3TE50630	LTR/Gypsy	ATHILA	519.617	7.3851	1.06092e-76
AT1TE50345	DNA/En-Spm	ATENSPM9	608.636	7.33299	1.5773e-76
AT4TE21670	DNA/MuDR	VANDAL5A	533.114	5.3449	1.92585e-76
AT3TE82555	LTR/Gypsy	ATGP3	582.739	6.89022	1.93161e-76
AT1TE50800	DNA/En-Spm	ATENSPM9	612.383	7.32625	3.13398e-76
AT4TE15280	LTR/Gypsy	ATHILA2	525.386	7.26748	3.78376e-76
AT3TE60195	LTR/Gypsy	ATHILA	473.959	7.32334	1.45082e-75
AT1TE43880	DNA/MuDR	ATMU11	437.24	7.34171	4.97219e-75
AT5TE50960	LTR/Gypsy	ATHILA8A	532.582	7.10898	5.08731e-75
AT2TE16420	DNA/En-Spm	ATENSPM9	576.07	7.16925	5.14098e-75
AT1TE45390	LTR/Gypsy	ATGP10	867.281	7.59532	7.72104e-75
AT3TE56730	LTR/Gypsy	ATHILA6A	383.956	7.82279	8.16982e-75
AT3TE59660	LTR/Gypsy	ATHILA4C	522.534	7.23388	9.29291e-75
AT4TE18715	LTR/Gypsy	ATHILA2	516.398	7.21763	3.39919e-74
AT2TE17305	LTR/Gypsy	ATGP3	413.344	7.27109	3.82356e-74
AT1TE96100	DNA/MuDR	ATMU11	500.599	7.21572	4.43631e-74
AT3TE56640	LTR/Gypsy	ATHILA	1654.5	8.41166	5.50685e-74
AT3TE51340	LTR/Gypsy	ATGP5	540.268	7.17005	6.51153e-74
AT5TE55490	Unassigned	Unassigned	1080.53	7.07795	9.25e-74
AT4TE14135	LTR/Gypsy	ATHILA5	467.242	7.22189	1.21877e-73
AT5TE43580	DNA/Harbinger	ATIS112A	469.519	6.27284	1.45444e-73
AT3TE50605	LTR/Gypsy	ATHILA2	516.716	7.0837	2.13593e-73
AT5TE38650	LTR/Gypsy	ATHILA6A	464.566	6.99644	1.03708e-72
AT1TE14085	DNA/MuDR	ATMU4	703.179	7.08233	1.32755e-72
AT4TE18440	LTR/Gypsy	ATHILA	571.972	7.06994	2.00328e-72
AT3TE61645	LTR/Gypsy	ATHILA	394.993	7.23708	2.82044e-72
AT5TE42925	LTR/Gypsy	ATHILA2	415.984	7.33425	3.22839e-72
AT1TE53065	LTR/Gypsy	ATHILA4A	393.393	7.20126	3.35956e-72
AT5TE44185	LTR/Gypsy	ATHILA4C	366.923	7.60799	3.38039e-72
AT2TE25740	DNA/Harbinger	ATIS112A	587.684	6.70257	3.59795e-72
AT3TE57110	LTR/Gypsy	ATHILA2	443.749	7.18563	5.54571e-72
AT3TE51810	LTR/Gypsy	ATHILA2	350.498	7.50112	7.5341e-72
AT2TE26315	DNA/HAT	ATHAT7	539.205	7.11582	9.01457e-72
AT4TE23195	DNA/MuDR	ATMU5	511.934	7.21689	1.1109e-71
AT5TE45055	LTR/Gypsy	ATHILA0_I	439.455	7.58686	1.58965e-71
AT1TE47780	LTR/Gypsy	ATHILA2	552.504	7.25017	2.65873e-71
AT1TE46310	LTR/Gypsy	ATHILA3	396.287	7.12629	2.85849e-71
AT1TE53395	LTR/Gypsy	ATHILA5	364.383	7.91564	7.10835e-71
AT2TE20445	LTR/Gypsy	ATGP2N	556.117	6.27309	7.45703e-71
AT2TE16585	LTR/Gypsy	ATHILA3	501.384	7.08619	9.92038e-71
AT1TE47745	LTR/Gypsy	ATHILA6A	433.671	7.12158	2.27559e-70
AT4TE15260	LTR/Gypsy	ATHILA2	430.456	7.15238	3.07544e-70
AT4TE14240	LTR/Gypsy	ATHILA5	393.129	7.23401	3.45967e-70
AT3TE51675	LTR/Copia	ATCOPIA43	736.176	7.50083	3.67199e-70
AT4TE15435	LTR/Gypsy	ATHILA3	375.457	7.00043	6.36411e-70
AT5TE45065	LTR/Gypsy	ATHILA6A	455.482	7.20632	1.0976e-69
AT4TE16150	LTR/Gypsy	ATHILA2	453.456	7.54047	1.18069e-69
AT1TE96425	DNA/MuDR	ATMU3	503.819	6.5261	1.47739e-69
AT2TE19485	LTR/Gypsy	ATHILA6B	377.192	7.33717	3.38583e-69
AT5TE37665	LTR/Gypsy	ATGP7	396.584	7.07724	3.62525e-69
AT3TE61520	DNA/En-Spm	ATENSPM2	431.164	7.09186	1.06867e-68
AT3TE52445	LTR/Gypsy	ATHILA4C	326.408	7.51432	1.54263e-68
AT3TE58620	LTR/Gypsy	ATHILA5	374.767	7.13453	1.67354e-68
AT1TE46770	LTR/Gypsy	ATHILA2	487.329	7.15398	1.70673e-68
AT1TE48780	LTR/Gypsy	ATHILA	364.844	7.25961	1.81202e-68
AT2TE19475	DNA/En-Spm	ATENSPM2	448.026	7.19921	2.87235e-68
AT5TE31200	LTR/Copia	ATCOPIA22	370.015	7.00368	5.94034e-68
AT2TE10985	LTR/Gypsy	ATHILA6A	338.595	7.29979	6.52433e-68
AT3TE57315	DNA/En-Spm	ATENSPM10	332.794	7.05674	5.1159e-67
AT4TE18680	LTR/Gypsy	ATHILA6A	452.616	6.9371	6.33083e-67
AT2TE28555	DNA/Harbinger	ATIS112A	393.773	5.7751	6.63424e-67
AT4TE09460	LTR/Copia	ATCOPIA44	495.159	6.8933	8.49204e-67
AT1TE49305	LTR/Gypsy	ATHILA2	439.747	7.01283	1.31553e-66
AT4TE15005	LTR/Gypsy	ATHILA3	466.492	7.25218	1.49542e-66
AT5TE33455	DNA/MuDR	ATMU1	476.343	6.81457	1.6314e-66
AT5TE33315	LTR/Gypsy	ATHILA7A	443.862	6.6454	1.88266e-66
AT4TE08990	LTR/Gypsy	ATHILA6A	403.824	7.03057	2.61088e-66
AT2TE00030	LTR/Gypsy	ATLANTYS3	507.985	5.35776	2.97101e-66
AT5TE43435	LTR/Gypsy	ATHILA6A	359.34	7.03314	3.06251e-66
AT3TE55155	LTR/Gypsy	ATHILA6B	339.6	7.34407	3.08633e-66
AT1TE19130	DNA/MuDR	ATMU3	492.943	6.91745	4.58581e-66
AT5TE38615	DNA/MuDR	ATMU8	377.101	7.08665	4.92512e-66
AT2TE22075	DNA/En-Spm	ATENSPM9	448.927	6.30413	4.99879e-66
AT4TE14990	LTR/Gypsy	ATHILA2	423.79	6.98366	7.28361e-66
AT5TE45005	LTR/Gypsy	ATHILA3	352.091	7.2408	7.80136e-66
AT5TE38370	DNA/En-Spm	ATENSPM7	345.97	6.96977	8.11427e-66
AT2TE22235	LTR/Gypsy	ATHILA7A	466.967	6.87861	8.43807e-66
AT4TE16980	LTR/Gypsy	ATGP3	427.142	7.1912	9.9236e-66
AT4TE16500	DNA/HAT	ATHAT7	442.608	6.88843	1.26443e-65
AT5TE43215	LTR/Copia	ATCOPIA27	721.174	6.89352	1.44466e-65
AT5TE41265	LTR/Gypsy	ATHILA2	368.701	6.91931	1.95011e-65
AT5TE36335	LTR/Copia	ATCOPIA19	317.776	7.18178	2.55276e-65
AT1TE45475	LTR/Gypsy	ATHILA6A	460.481	6.88778	3.32748e-65
AT5TE22990	DNA/En-Spm	ATENSPM2	521.853	6.81151	3.67294e-65
AT5TE43990	LTR/Gypsy	ATHILA2	408.135	6.92542	4.16769e-65
AT1TE42395	LTR/Gypsy	ATGP3	291.356	7.35913	4.40473e-65
AT3TE67325	DNA/HAT	ATHAT2	434.238	5.81316	5.56715e-65
AT5TE39090	LTR/Gypsy	ATHILA5	364.415	7.00695	5.83882e-65
AT1TE53415	LTR/Gypsy	ATHILA5	403.158	6.90575	6.5479e-65
AT2TE27670	LINE/L1	ATLINE1_4	422.617	6.14856	6.57227e-65
AT4TE09780	DNA/En-Spm	ATENSPM9	430.279	7.20641	9.69013e-65
AT1TE52000	LTR/Gypsy	ATHILA2	413.613	6.90328	1.13658e-64
AT3TE51650	LTR/Gypsy	ATHILA2	660.042	6.64046	1.13658e-64
AT4TE18650	LTR/Gypsy	ATHILA4B_LTR	419.084	6.97526	1.16501e-64
AT3TE44950	DNA/MuDR	VANDAL6	414.367	6.69031	1.26069e-64
AT4TE21180	LTR/Gypsy	ATHILA5	375.466	6.97333	1.41119e-64
AT1TE46625	DNA/MuDR	VANDAL8	444.766	6.63049	2.81918e-64
AT2TE28020	DNA/MuDR	ATMU1	475.154	6.7039	3.35873e-64
AT4TE09455	DNA/En-Spm	ATENSPM11	434.591	6.94526	3.47892e-64
AT2TE10975	LTR/Gypsy	ATHILA8A	330.155	6.95004	4.59522e-64
AT5TE08220	Unassigned	Unassigned	279.789	6.9367	5.64795e-64
AT3TE40420	LTR/Copia	ATCOPIA82	306.128	7.43296	9.69239e-64
AT5TE40295	DNA/En-Spm	ATENSPM5	447.904	6.88017	1.09791e-63
AT3TE63405	DNA/En-Spm	ATENSPM2	448.798	5.12847	2.04739e-63
AT2TE13685	LTR/Copia	ATCOPIA32	294.562	7.40253	2.36949e-63
AT4TE09175	Unassigned	Unassigned	416.839	6.71434	4.24668e-63
AT1TE51910	DNA/En-Spm	ATENSPM4	281.395	6.96762	4.65138e-63
AT4TE18785	LTR/Gypsy	ATHILA4A	275.399	7.3222	5.03615e-63
AT5TE47155	LTR/Gypsy	ATHILA5	318.475	7.01013	5.74457e-63
AT3TE20780	DNA/MuDR	VANDAL21	452.918	5.49371	6.44668e-63
AT3TE62570	DNA/HAT	ATHAT7	376.192	7.04259	6.86381e-63
AT4TE09060	LTR/Gypsy	ATHILA5	359.143	6.95701	8.17096e-63
AT5TE42335	LTR/Gypsy	ATHILA2	382.171	6.741	8.92642e-63
AT1TE41860	LINE/L1	TA11	288.35	7.48825	1.44069e-62
AT5TE44130	LTR/Gypsy	ATHILA8A	371.425	6.9697	1.54153e-62
AT2TE16245	LTR/Gypsy	ATHILA6A	432.687	6.78925	4.0465e-62
AT3TE52325	LTR/Gypsy	ATHILA0_I	329.303	6.90346	4.76072e-62
AT3TE54000	DNA/En-Spm	ATENSPM4	445.256	6.74963	5.27066e-62
AT3TE53100	LTR/Gypsy	ATGP2N	325.582	6.93221	8.59722e-62
AT1TE53050	LTR/Gypsy	ATHILA8A	328.949	6.88998	1.19204e-61
AT5TE39050	LTR/Gypsy	ATHILA4	281.031	7.63912	1.20919e-61
AT3TE55480	LTR/Gypsy	ATHILA6B	394.99	6.76263	2.31776e-61
AT2TE08275	DNA/MuDR	VANDAL5A	423.236	5.45228	2.53818e-61
AT2TE22510	LTR/Gypsy	ATHILA2	451.142	6.73376	3.13352e-61
AT2TE15655	DNA/MuDR	VANDAL17	395.969	6.75202	3.13518e-61
AT1TE45375	DNA/En-Spm	ATENSPM3	572.058	7.15395	3.93918e-61
AT3TE53745	DNA/MuDR	VANDAL21	378.761	6.24227	5.85973e-61
AT2TE23185	DNA/En-Spm	ATENSPM9	461.843	6.78005	1.16578e-60
AT5TE44365	LTR/Gypsy	ATHILA2	389.723	6.82126	1.32409e-60
AT1TE39380	DNA/MuDR	ATMU10	427.899	6.71302	1.46518e-60
AT3TE47740	SINE	ATSINE2A	385.63	5.82171	1.51068e-60
AT3TE57360	DNA/MuDR	VANDAL21	317.897	6.74731	2.38737e-60
AT4TE18625	LTR/Gypsy	ATHILA5	329.204	6.80467	2.40619e-60
AT1TE62360	Unassigned	SADHU	416.829	6.59179	2.44425e-60
AT5TE36825	LTR/Gypsy	ATLANTYS2	389.016	5.75276	3.80671e-60
AT2TE20590	LTR/Gypsy	ATHILA8B	352.88	6.69709	4.84407e-60
AT5TE43895	LTR/Gypsy	ATHILA	259.768	7.13858	1.66248e-59
AT2TE21475	LTR/Gypsy	ATHILA2	329.147	7.16955	2.10837e-59
AT5TE42270	LTR/Gypsy	ATGP2N	377.822	5.67447	2.94659e-59
AT1TE58075	LTR/Copia	ATCOPIA38A	373.351	6.6476	3.48689e-59
AT1TE47035	LTR/Gypsy	ATHILA4C	255.386	6.72045	4.23077e-59
AT5TE42250	DNA/En-Spm	ATENSPM9	248.465	7.22914	6.81762e-59
AT4TE15585	LTR/Gypsy	ATHILA4C	325.568	6.76498	7.12299e-59
AT3TE61600	DNA/MuDR	VANDAL20	350.185	6.68151	8.81336e-59
AT2TE19600	DNA/En-Spm	ATENSPM1A	406.224	6.72219	1.07011e-58
AT3TE51565	LTR/Gypsy	ATGP2N	418.242	5.54589	1.56043e-58
AT4TE14995	LTR/Gypsy	ATHILA2	354.736	6.73843	1.56184e-58
AT4TE18610	LTR/Gypsy	ATHILA3	263.435	6.93361	2.98661e-58
AT3TE51335	LTR/Gypsy	ATGP6	368.54	6.72774	3.13957e-58
AT1TE47545	LTR/Gypsy	ATHILA2	337.588	6.69579	4.16026e-58
AT1TE72060	LTR/Copia	ATRE1	434.246	5.98673	5.99653e-58
AT4TE36845	LTR/Copia	ATCOPIA17	265.962	6.66531	8.61274e-58
AT1TE71950	LTR/Copia	ATRE1	434.657	5.8518	1.15305e-57
AT5TE42345	LTR/Gypsy	ATHILA2	380.047	6.38965	2.18814e-57
AT2TE06040	DNA/En-Spm	ATENSPM7	267.009	6.87739	2.65178e-57
AT4TE17500	LTR/Gypsy	ATHILA	257.837	6.69522	3.00273e-57
AT4TE22955	DNA/En-Spm	ATENSPM9	385.093	6.5974	3.5095e-57
AT1TE52860	DNA/Harbinger	ATIS112A	379.674	4.58957	4.29812e-57
AT5TE46910	LTR/Gypsy	ATHILA8B	281.787	6.82001	6.525e-57
AT4TE15940	LTR/Gypsy	ATHILA2	315.193	6.66802	8.63408e-57
AT2TE13340	LTR/Copia	ATCOPIA95	380.048	6.67895	1.10997e-56
AT4TE18595	LTR/Gypsy	ATHILA5	297.564	6.68918	1.34087e-56
AT3TE52315	LTR/Gypsy	ATHILA5	294.738	6.72256	1.81698e-56
AT5TE35265	DNA/MuDR	ATMU5	382.978	6.51868	2.37873e-56
AT5TE43400	LTR/Gypsy	ATHILA2	261.373	6.69523	2.45641e-56
AT2TE00115	LTR/Gypsy	ATGP1	445.794	4.83315	2.47781e-56
AT5TE39850	LTR/Gypsy	ATGP10	457.519	6.576	2.70294e-56
AT5TE41345	LTR/Gypsy	ATHILA2	310.885	6.59664	3.14835e-56
AT1TE52210	DNA/En-Spm	ATENSPM1	428.089	6.59312	3.32852e-56
AT2TE21100	DNA/En-Spm	ATENSPM5	307.436	6.59585	3.78241e-56
AT1TE47720	LTR/Gypsy	ATHILA2	300.923	6.6097	4.66897e-56
AT3TE42960	LINE/L1	TA11	392.341	5.28612	4.80037e-56
AT3TE68090	LTR/Copia	ATCOPIA81	240.546	6.48086	5.01779e-56
AT3TE63035	LTR/Gypsy	ATLANTYS2	428.06	6.45505	9.95077e-56
AT3TE62390	Unassigned	Unassigned	348.706	6.62285	1.22845e-55
AT1TE45510	DNA/En-Spm	ATENSPM6	238.681	6.18931	1.31133e-55
AT2TE11385	DNA/En-Spm	ATENSPM9	352.979	6.62447	2.33623e-55
AT3TE60555	DNA/En-Spm	ATENSPM9	337.551	6.51279	4.31697e-55
AT3TE50560	LTR/Gypsy	ATHILA8B	288.912	6.70707	6.07245e-55
AT2TE28025	LTR/Gypsy	ATGP10	413.841	6.85344	8.68982e-55
AT3TE62735	DNA/En-Spm	ATENSPM6	312.694	6.61486	9.88664e-55
AT5TE41090	LTR/Gypsy	ATHILA	219.828	7.07497	1.09697e-54
AT3TE53095	LTR/Gypsy	ATLANTYS2	299.109	6.68344	1.5557e-54
AT1TE64825	DNA/MuDR	ATMU1	339.813	6.31638	1.7456e-54
AT2TE38575	LTR/Copia	ATCOPIA74	234.694	6.1707	3.48088e-54
AT2TE16530	LTR/Gypsy	ATHILA4C	337.702	6.49825	3.80222e-54
AT4TE08980	LTR/Gypsy	ATGP2	307.751	5.45044	4.17245e-54
AT3TE59695	LTR/Gypsy	ATHILA2	275.345	6.58736	4.7899e-54
AT2TE13060	LTR/Copia	ATCOPIA32	315.812	6.43426	5.40928e-54
AT2TE19625	LTR/Gypsy	ATHILA4C	442.145	6.73508	5.63714e-54
AT1TE48720	LTR/Gypsy	ATHILA6A	213.812	7.00264	6.67686e-54
AT4TE23825	DNA/MuDR	VANDAL2	337.305	6.44018	8.35628e-54
AT4TE54700	LTR/Gypsy	ATGP3	283.271	6.55019	1.06081e-53
AT1TE53095	LTR/Copia	ATCOPIA58	273.229	6.65869	1.24013e-53
AT5TE68140	LTR/Copia	ATCOPIA58	212.769	7.11383	1.64283e-53
AT1TE46190	LTR/Gypsy	ATHILA2	292.595	6.54077	2.31608e-53
AT2TE26910	DNA/MuDR	ARNOLD2	355.983	6.48505	2.92171e-53
AT4TE21140	DNA/En-Spm	ATENSPM10	284.066	6.51801	3.18461e-53
AT2TE20935	LTR/Gypsy	ATHILA5	274.744	6.54637	6.21393e-53
AT5TE43905	LTR/Gypsy	ATHILA8B	270.784	6.72879	6.56362e-53
AT3TE61065	LTR/Gypsy	ATHILA5	355.862	6.38303	7.58533e-53
AT2TE17870	LTR/Copia	ATCOPIA32B	217.979	6.76082	1.3443e-52
AT5TE46350	LTR/Gypsy	ATHILA3	216.206	6.81207	1.46455e-52
AT3TE59560	LTR/Gypsy	ATGP8	284.361	6.07662	1.8747e-52
AT4TE20545	DNA/En-Spm	ATENSPM3	252.094	6.63592	2.20227e-52
AT2TE11545	DNA/En-Spm	ATENSPM6	313.85	6.45718	2.96416e-52
AT1TE72615	DNA/HAT	ATHAT1	431.611	6.08605	3.05588e-52
AT1TE34580	LTR/Copia	ATCOPIA73	234.673	6.53022	4.15382e-52
AT5TE54525	DNA/MuDR	VANDAL12	311.375	6.38275	8.78479e-52
AT4TE18165	LTR/Gypsy	ATHILA5	272.231	6.46611	9.70125e-52
AT2TE08225	LTR/Gypsy	ATGP3	557.705	4.04953	1.00139e-51
AT2TE00015	LTR/Gypsy	ATGP2	379.992	4.18776	1.03611e-51
AT5TE23285	LTR/Copia	ATCOPIA90	205.197	6.42683	1.081e-51
AT2TE13950	LINE/L1	ATLINE1_2	285.034	5.91927	1.22603e-51
AT2TE11515	DNA/MuDR	ARNOLD3	305.285	6.2693	1.35481e-51
AT4TE15380	LTR/Gypsy	ATHILA3	285.206	6.33599	1.43565e-51
AT2TE38910	LTR/Copia	ATCOPIA76	236.863	6.78478	1.6947e-51
AT5TE39045	LTR/Gypsy	ATHILA4A	202.163	7.02151	3.19346e-51
AT5TE42975	LTR/Gypsy	ATHILA6A	290.114	6.46066	3.54063e-51
AT3TE54950	DNA/En-Spm	ATENSPM3	216.545	6.6315	4.63799e-51
AT3TE58605	LTR/Gypsy	ATHILA4C	291.133	6.8287	6.93278e-51
AT1TE43030	LTR/Gypsy	ATGP7	262.832	6.4215	7.3692e-51
AT3TE21700	DNA/Harbinger	ATIS112A	567.811	3.92448	9.31514e-51
AT3TE61290	LTR/Gypsy	ATLANTYS2	553.702	5.95211	1.05142e-50
AT5TE00230	LTR/Copia	ATCOPIA27	554.222	6.26685	1.26072e-50
AT1TE46785	LTR/Gypsy	ATHILA0_I	264.961	6.44327	1.36291e-50
AT2TE12825	DNA/MuDR	ATMU9	295.673	6.42587	1.46735e-50
AT1TE43605	LTR/Gypsy	ATGP3	194.955	7.16732	1.62047e-50
AT4TE13375	LTR/Gypsy	ATHILA0_I	213.22	6.55025	1.73172e-50
AT4TE15285	LTR/Gypsy	ATHILA6A	263.586	6.39401	1.91811e-50
AT5TE48195	DNA/Harbinger	ATIS112A	223.978	6.5826	1.93059e-50
AT1TE52120	LTR/Gypsy	ATHILA2	305.114	6.26562	1.93424e-50
AT5TE43910	LTR/Gypsy	ATGP10	252.474	6.53309	2.25958e-50
AT4TE09480	DNA/MuDR	VANDAL20	280.037	6.3666	4.43692e-50
AT2TE16805	LTR/Gypsy	ATHILA4	258.837	6.28675	6.29895e-50
AT4TE24910	LTR/Copia	ATCOPIA9	343.469	6.10301	7.9245e-50
AT4TE18065	LTR/Gypsy	ATHILA2	241.257	6.41462	9.23309e-50
AT2TE22635	LINE/L1	TA11	297.865	6.50774	1.13306e-49
AT3TE63040	Unassigned	Unassigned	291.246	6.40162	1.51267e-49
AT2TE16425	DNA/En-Spm	ATENSPM5	291.955	6.2977	1.59786e-49
AT5TE42860	LTR/Gypsy	ATHILA3	219.57	6.51027	2.51899e-49
AT3TE56630	LTR/Gypsy	ATHILA	1050.14	7.45829	3.05683e-49
AT5TE38320	DNA/En-Spm	ATENSPM7	263.701	6.36084	3.13889e-49
AT5TE42940	LTR/Gypsy	ATHILA2	205.707	6.55545	3.2756e-49
AT2TE26385	DNA/En-Spm	ATENSPM10	183.317	6.92688	3.81356e-49
AT2TE19430	LTR/Gypsy	ATHILA0_I	275.706	6.20816	4.16071e-49
AT5TE18475	DNA/MuDR	VANDAL12	344.412	6.08478	7.09553e-49
AT3TE57215	LTR/Gypsy	ATHILA5	189.017	6.82912	7.90617e-49
AT2TE20140	DNA/MuDR	VANDAL21	295.135	5.86928	9.99667e-49
AT2TE18155	DNA/MuDR	ATMU6	223.881	6.36273	1.35518e-48
AT5TE40570	DNA/En-Spm	ATENSPM6	255.912	6.34317	1.40145e-48
AT1TE52135	LTR/Gypsy	ATHILA2	284.813	6.26677	1.48311e-48
AT4TE11335	DNA/MuDR	VANDAL12	340.449	6.07603	1.82879e-48
AT1TE30195	LTR/Copia	ATCOPIA16	196.134	6.86621	2.07632e-48
AT1TE44670	LTR/Gypsy	ATHILA6B	211.789	6.59777	2.63936e-48
AT4TE10985	LTR/Gypsy	ATGP2N	313.433	5.46379	2.63941e-48
AT1TE51215	LTR/Gypsy	ATHILA	212.307	6.65075	2.70175e-48
AT3TE56035	LTR/Gypsy	ATHILA6B	261.816	6.29855	2.87848e-48
AT5TE46685	LTR/Gypsy	ATHILA4C	215.937	6.48945	3.34257e-48
AT4TE39815	LINE/L1	ATLINE1_2	261.471	6.27389	4.32621e-48
AT2TE11315	LINE/L1	ATLINE1_6	186.396	6.64264	6.21459e-48
AT5TE44205	LTR/Gypsy	ATHILA2	248.556	6.31696	6.32086e-48
AT5TE49130	DNA/HAT	ATHAT3	286.19	6.53269	6.49828e-48
AT5TE39060	LTR/Gypsy	ATHILA6A	190.478	6.92478	8.68542e-48
AT1TE51835	DNA/En-Spm	ATENSPM3	214.985	6.62608	9.55274e-48
AT5TE43575	LINE/L1	ATLINE2	272.204	6.45757	1.3741e-47
AT2TE18240	DNA/Harbinger	ATIS112A	252.537	5.60303	1.44166e-47
AT1TE49325	LTR/Gypsy	ATHILA2	252.937	6.49154	1.59139e-47
AT3TE60160	LTR/Gypsy	ATGP1	233.156	6.30391	2.15398e-47
AT4TE18685	LTR/Gypsy	ATHILA2	267.492	6.28212	3.13212e-47
AT1TE42875	SINE	ATSINE2A	937.651	5.80921	3.40699e-47
AT3TE53630	LINE/L1	ATLINE1_1	230.336	6.47593	3.70913e-47
AT4TE07975	LTR/Copia	ATCOPIA11	183.372	6.77978	3.93346e-47
AT3TE53865	LTR/Gypsy	ATGP5	270.983	6.31936	4.60975e-47
AT1TE48850	LTR/Gypsy	ATHILA6B	177.111	6.76057	5.006e-47
AT3TE51630	LTR/Gypsy	ATHILA7	178.406	6.66394	6.10682e-47
AT3TE41650	DNA/MuDR	VANDAL5A	259.466	5.68406	7.07542e-47
AT5TE15640	LINE/L1	ATLINE2	226.451	5.90814	7.23708e-47
AT2TE16545	LTR/Gypsy	ATHILA	190.419	6.45153	7.60426e-47
AT3TE52625	RC/Helitron	HELITRON1	211.962	6.2721	8.15409e-47
AT1TE54645	DNA/En-Spm	ATENSPM9	283.739	6.01044	8.53321e-47
AT3TE52630	Unassigned	SADHU	209.101	6.35367	8.59126e-47
AT5TE42145	LTR/Gypsy	ATHILA	213.52	6.70171	9.51279e-47
AT3TE49725	DNA/En-Spm	ATENSPM2	246.867	6.34693	1.17702e-46
AT1TE58700	LTR/Copia	ATCOPIA51	268.245	4.49821	1.218e-46
AT5TE43060	LTR/Gypsy	ATHILA2	341.829	6.35026	1.29702e-46
AT1TE46685	LTR/Gypsy	ATHILA2	235.564	6.24711	1.93228e-46
AT2TE10575	LTR/Gypsy	ATHILA4C	224.595	5.83399	2.78449e-46
AT4TE44390	DNA/HAT	SIMPLEHAT1	315.301	5.57231	2.80229e-46
AT2TE12505	LTR/Gypsy	ATHILA	217.279	5.81618	5.51379e-46
AT4TE18790	LTR/Gypsy	ATGP8	169.108	6.68048	6.2704e-46
AT2TE08785	LTR/Copia	ATCOPIA66	969.41	4.0437	6.57766e-46
AT4TE18665	LTR/Gypsy	ATHILA2	257.086	6.26767	7.74522e-46
AT1TE51060	LTR/Gypsy	ATHILA	263.48	6.26913	7.90583e-46
AT5TE46485	LTR/Gypsy	ATHILA6A	221.086	6.36611	9.58539e-46
AT3TE61075	LTR/Gypsy	ATHILA0_I	252.818	5.98937	1.15958e-45
AT2TE26855	DNA/MuDR	ARNOLD2	314.628	6.05592	1.69014e-45
AT2TE19615	DNA/MuDR	VANDAL21	322.733	5.58065	4.66851e-45
AT1TE56400	LINE/L1	ATLINE1_1	164.726	7.00372	5.06412e-45
AT5TE46045	LTR/Gypsy	ATHILA	305.649	6.69405	6.48326e-45
AT1TE46140	LTR/Gypsy	ATHILA	169.505	6.33435	6.97824e-45
AT1TE47130	LTR/Gypsy	ATHILA0_I	163.971	6.61189	9.11779e-45
AT1TE47350	LTR/Gypsy	ATHILA0_I	163.971	6.61189	9.11779e-45
AT5TE47525	DNA/En-Spm	ATENSPM6	169.37	6.54568	1.03767e-44
AT4TE18055	LTR/Gypsy	ATHILA2	240.368	6.20222	1.41792e-44
AT1TE51370	LTR/Gypsy	ATHILA2	226.291	6.19828	1.48019e-44
AT1TE47730	LTR/Gypsy	ATHILA6A	228.08	6.12895	1.87249e-44
AT4TE09580	DNA/En-Spm	ATENSPM4	259.126	6.28164	1.88231e-44
AT3TE57470	LTR/Gypsy	ATHILA6A	170.165	6.43075	2.33181e-44
AT5TE43825	LTR/Gypsy	ATHILA2	221.126	6.1538	2.99919e-44
AT3TE63465	LINE/L1	ATLINE1_6	166.791	6.37029	3.49778e-44
AT3TE49825	DNA/MuDR	VANDAL12	258.312	6.13004	7.05711e-44
AT1TE72970	LTR/Copia	ATCOPIA5	277.626	5.93109	7.09374e-44
AT2TE16415	LTR/Gypsy	ATHILA4	225.934	6.09335	1.28971e-43
AT4TE18075	LTR/Gypsy	ATHILA	172.202	6.38456	1.42403e-43
AT2TE29460	LINE/L1	TA11	159.862	6.3352	1.85039e-43
AT5TE45200	LTR/Gypsy	ATHILA4	152.962	6.8639	2.96216e-43
AT4TE15970	LTR/Gypsy	ATHILA3	169.161	6.23273	4.39769e-43
AT5TE42920	LTR/Gypsy	ATHILA2	178.484	6.26888	5.56796e-43
AT1TE51190	LTR/Gypsy	ATHILA	174.875	6.38395	6.48488e-43
AT3TE50050	LTR/Gypsy	ATHILA8B	193.725	6.20963	6.63123e-43
AT5TE41600	DNA/En-Spm	ATENSPM1A	176.344	6.22609	7.08991e-43
AT1TE46795	DNA/En-Spm	ATENSPM5	253.802	5.99616	7.19672e-43
AT2TE30555	LTR/Copia	ATCOPIA71	152.722	6.60422	8.70417e-43
AT4TE20540	DNA/En-Spm	ATENSPM3	172.132	6.28525	1.00263e-42
AT5TE42670	LTR/Gypsy	ATHILA2	198.239	6.26502	1.07975e-42
AT3TE47555	DNA/MuDR	VANDAL21	255.637	5.50342	1.11009e-42
AT4TE15950	LTR/Gypsy	ATHILA6A	220.073	6.03942	1.4043e-42
AT2TE17875	LTR/Gypsy	ATGP2	253.374	5.61419	1.40809e-42
AT4TE10335	LTR/Copia	ATCOPIA58	184.367	6.38745	2.00523e-42
AT1TE49315	LTR/Gypsy	ATHILA2	240.539	6.06916	2.54685e-42
AT1TE53030	DNA/HAT	ATHAT3	153.962	6.57164	2.66465e-42
AT3TE62595	DNA/MuDR	VANDAL17	216.579	5.56307	3.40117e-42
AT4TE40685	LTR/Copia	ATCOPIA48	226.842	4.66899	5.20129e-42
AT3TE54575	DNA/MuDR	ATMU9	231.646	6.24679	5.48572e-42
AT2TE15590	LTR/Gypsy	ATHILA6A	150.921	6.38356	5.59306e-42
AT3TE51300	LTR/Gypsy	ATHILA2	206.75	6.10899	5.61161e-42
AT3TE51740	DNA/En-Spm	ATENSPM7	212.688	6.02358	6.93994e-42
AT2TE21730	LTR/Gypsy	ATHILA3	166.043	6.31261	7.18524e-42
AT5TE55140	DNA/MuDR	VANDAL7	232.535	5.98056	7.28741e-42
AT3TE49720	LTR/Gypsy	ATGP8	157.893	6.17615	8.13238e-42
AT1TE52610	DNA/En-Spm	ATENSPM2	220.451	6.05949	8.82677e-42
AT1TE46960	DNA/En-Spm	ATENSPM9	183.171	6.53954	9.75395e-42
AT5TE14165	LTR/Gypsy	ATGP3	161.5	6.26765	1.01609e-41
AT4TE15820	LTR/Gypsy	ATLANTYS2	6844.99	6.85038	1.79158e-41
AT2TE18895	LTR/Gypsy	ATHILA6A	198.521	6.16396	1.97362e-41
AT4TE16385	LTR/Gypsy	ATLANTYS2	397.315	5.64015	2.27469e-41
AT1TE52885	DNA/En-Spm	ATENSPM10	158.225	5.78313	2.43218e-41
AT5TE50380	LTR/Copia	ATCOPIA91	258.093	4.59642	2.50638e-41
AT2TE06610	DNA/En-Spm	ATENSPM5	619.913	6.50371	2.81547e-41
AT5TE37660	LTR/Gypsy	ATGP3	193.091	6.03851	2.99459e-41
AT5TE43620	LTR/Gypsy	ATHILA5	198.838	6.03409	3.07079e-41
AT3TE61640	LTR/Gypsy	ATHILA2	196.893	6.04303	3.39993e-41
AT2TE15660	DNA/Harbinger	HARBINGER	176.285	6.12048	3.68819e-41
AT2TE21530	LTR/Gypsy	ATLANTYS2	160.934	6.16836	3.83139e-41
AT2TE16190	LTR/Gypsy	ATHILA2	153.066	6.17099	4.13022e-41
AT3TE45430	LTR/Gypsy	ATGP10	298.538	4.48101	6.085e-41
AT1TE48785	LTR/Gypsy	ATHILA6A	164.89	6.2073	9.08718e-41
AT2TE13355	LTR/Gypsy	ATHILA6A	204.822	5.96188	1.30076e-40
AT4TE22970	DNA/MuDR	VANDAL8	202.727	5.83047	1.40577e-40
AT3TE47235	LTR/Copia	ATCOPIA27	376.567	5.79918	1.44461e-40
AT4TE14410	LTR/Gypsy	ATHILA2	183.608	6.02636	1.65298e-40
AT4TE13565	LTR/Gypsy	ATHILA3	168.204	6.05933	2.03881e-40
AT5TE46175	DNA/MuDR	VANDAL20	209.135	6.22907	2.95873e-40
AT2TE19590	LTR/Gypsy	ATHILA4C	238.722	5.88155	3.32643e-40
AT3TE63165	LTR/Copia	ATCOPIA16	201.07	6.2249	4.37329e-40
AT5TE49335	DNA/MuDR	VANDAL2	191.633	5.86929	5.01073e-40
AT2TE28160	LTR/Copia	ATCOPIA38	163.595	5.97856	5.42893e-40
AT4TE19910	LTR/Gypsy	ATHILA0_I	228.768	6.13291	5.75861e-40
AT3TE57340	LTR/Gypsy	ATHILA2	200.837	5.97986	6.08135e-40
AT1TE46580	LTR/Gypsy	ATHILA2	204.354	5.9188	8.93489e-40
AT1TE04710	DNA/MuDR	ATDNAI27T9B	264.089	5.62089	1.0164e-39
AT4TE15755	LTR/Gypsy	ATHILA6A	162.218	6.1193	1.15617e-39
AT2TE16265	LTR/Gypsy	ATHILA2	187.704	5.95075	1.4753e-39
AT2TE10570	LTR/Gypsy	ATHILA4C	191.648	5.43803	1.79232e-39
AT3TE55425	LTR/Gypsy	ATHILA6A	152.344	6.19118	1.84274e-39
AT4TE18655	LTR/Gypsy	ATHILA4A	201.593	5.97278	1.87558e-39
AT1TE45965	LTR/Gypsy	ATHILA8B	152.334	6.20577	2.11043e-39
AT1TE44770	LTR/Gypsy	ATGP3	142.684	6.45895	2.28697e-39
AT4TE18365	LTR/Gypsy	ATHILA4C	156.933	5.8912	2.58599e-39
AT4TE21185	LTR/Gypsy	ATHILA5	179.265	5.99408	3.30796e-39
AT3TE50120	LTR/Gypsy	ATGP3	136.841	6.45619	4.89064e-39
AT5TE43630	LTR/Gypsy	ATHILA5	175.535	5.95696	4.96725e-39
AT4TE09570	LTR/Gypsy	ATGP10	583.555	6.43311	5.85971e-39
AT2TE07640	DNA/HAT	ATHAT3	129.524	6.56895	8.09965e-39
AT2TE05665	RC/Helitron	ATREP3	185.678	5.90345	8.31009e-39
AT1TE40340	LTR/Gypsy	ATLANTYS1	130.23	6.66465	9.70172e-39
AT2TE25840	DNA/MuDR	VANDAL2	211.151	5.57155	1.50689e-38
AT3TE59605	LTR/Gypsy	ATHILA2	178.346	5.81692	1.65896e-38
AT1TE45870	DNA/En-Spm	ATENSPM9	166.372	5.94359	1.67054e-38
AT5TE47505	LTR/Gypsy	ATHILA3	178.337	5.92377	1.69812e-38
AT5TE44055	LTR/Gypsy	ATHILA2	178.649	5.81345	1.7021e-38
AT5TE54510	DNA/MuDR	ATMU11	213.672	5.80393	1.76183e-38
AT4TE28870	LTR/Copia	ATCOPIA17	170.359	6.03361	3.49517e-38
AT4TE14225	LTR/Gypsy	ATHILA3	145.735	5.94616	3.81841e-38
AT2TE13955	LTR/Gypsy	ATGP2	189.392	5.40449	3.83056e-38
AT3TE57145	LTR/Gypsy	ATHILA6A	175.081	5.93825	4.60903e-38
AT5TE48930	LTR/Copia	ATCOPIA24	154.96	5.85898	5.28734e-38
AT2TE16955	DNA/En-Spm	ATENSPM3	356.588	5.24909	5.30441e-38
AT3TE39220	LTR/Copia	ATCOPIA17	127.134	6.40447	5.49504e-38
AT1TE50895	LTR/Gypsy	ATHILA2	177.59	5.85387	7.09353e-38
AT4TE09245	RC/Helitron	HELITRONY3	210.247	5.56009	7.90671e-38
AT2TE15565	LINE/L1	ATLINE1_2	165.667	5.88588	9.20235e-38
AT4TE18645	LTR/Copia	ATCOPIA42	152.959	5.97687	9.22994e-38
AT4TE14005	LTR/Gypsy	ATHILA3	140.045	6.10447	1.00842e-37
AT2TE13385	LTR/Copia	ATCOPIA20	140.764	5.87228	1.06411e-37
AT4TE46305	Unassigned	Unassigned	239.025	5.65233	1.18259e-37
AT3TE47775	DNA/En-Spm	ATENSPM6	186.93	5.91076	1.30521e-37
AT3TE57565	LTR/Gypsy	ATGP10	145.252	5.9685	1.44003e-37
AT4TE18765	LTR/Gypsy	ATHILA3	149.551	5.79708	1.56906e-37
AT3TE50260	LTR/Gypsy	ATHILA4	125.607	6.51823	1.76892e-37
AT4TE09135	LINE/L1	ATLINE2	195.075	5.71779	2.31998e-37
AT2TE28030	LTR/Gypsy	ATGP10	215.017	5.98493	3.01404e-37
AT2TE20960	LTR/Gypsy	ATLANTYS1	214.413	5.52674	3.13321e-37
AT4TE04415	DNA/Harbinger	ATIS112A	878.41	2.7453	3.26633e-37
AT3TE51590	LTR/Gypsy	ATHILA3	132.533	6.07843	4.11519e-37
AT1TE51020	LTR/Gypsy	ATHILA2	161.761	5.8797	5.35248e-37
AT3TE63400	DNA/HAT	ATHATN6	228.553	4.77556	5.88839e-37
AT5TE46855	LTR/Gypsy	ATHILA8B	847.946	6.63469	6.80761e-37
AT5TE41325	LTR/Gypsy	ATHILA2	165.837	5.68275	1.08239e-36
AT2TE00045	LTR/Gypsy	ATGP2N	250.464	4.8723	1.10184e-36
AT2TE00035	LTR/Gypsy	ATGP2N	242.801	5.06698	1.11787e-36
AT4TE19140	LTR/Gypsy	ATHILA6A	191.602	5.73865	1.18948e-36
AT2TE11330	LTR/Gypsy	ATHILA2	175.635	5.86428	1.43011e-36
AT2TE27465	LTR/Gypsy	ATLANTYS1	213.098	5.40437	1.87223e-36
AT1TE47590	LTR/Gypsy	ATHILA0_I	119.985	6.21169	2.51725e-36
AT1TE53970	LTR/Copia	ATCOPIA69	129.995	6.0828	3.03776e-36
AT2TE28280	DNA/HAT	TAG2	196.908	5.45484	5.07349e-36
AT1TE45695	LTR/Gypsy	ATHILA3	137.835	6.01433	5.57827e-36
AT1TE67645	LTR/Gypsy	ATGP2N	333.89	4.14515	6.84382e-36
AT4TE15890	DNA/MuDR	VANDAL8	176.602	5.58232	8.15767e-36
AT2TE21745	LTR/Gypsy	ATHILA4C	126.008	6.15592	9.93476e-36
AT1TE51945	DNA/En-Spm	ATENSPM4	119.081	6.05512	1.07194e-35
AT1TE53055	LTR/Gypsy	ATHILA8A	140.281	5.85451	1.80742e-35
AT4TE13825	LTR/Gypsy	ATHILA	138.843	6.04828	1.86526e-35
AT2TE22065	LTR/Gypsy	ATGP5	176.177	5.6738	2.01828e-35
AT1TE46970	DNA/En-Spm	ATENSPM9	132.142	6.18604	2.30594e-35
AT2TE02290	LINE/L1	TA11	117.842	6.32139	2.83456e-35
AT4TE13290	LTR/Gypsy	ATHILA2	173.836	5.82431	2.98018e-35
AT1TE49330	LTR/Gypsy	ATHILA6A	128.688	6.10195	3.427e-35
AT2TE00120	LTR/Gypsy	ATGP2N	245.328	4.78677	3.93007e-35
AT1TE23740	DNA/MuDR	VANDAL14	489.476	3.60027	4.97236e-35
AT4TE08985	LTR/Gypsy	ATGP2N	191.808	4.97227	6.14973e-35
AT5TE57495	LTR/Gypsy	ATLANTYS1	154.223	5.86348	8.49417e-35
AT5TE43075	LTR/Gypsy	ATHILA4C	189.294	5.57325	9.56958e-35
AT4TE19180	LTR/Gypsy	ATHILA2	144.405	5.75565	1.03652e-34
AT5TE32355	LTR/Copia	ATCOPIA27	308.166	5.63115	1.08141e-34
AT3TE51620	LTR/Gypsy	ATHILA6A	120.031	6.15512	1.39742e-34
AT5TE42035	LTR/Gypsy	ATLANTYS2	162.605	5.67701	1.90573e-34
AT2TE08110	DNA/MuDR	ARNOLD2	235.265	5.65017	2.0236e-34
AT1TE52715	DNA/Harbinger	ATIS112A	116.919	6.21549	2.06067e-34
AT2TE22230	LTR/Gypsy	ATHILA7	190.051	5.53283	2.35165e-34
AT2TE19620	LTR/Gypsy	ATHILA4B_LTR	215.79	5.80499	3.4954e-34
AT3TE34430	DNA/HAT	TAG2	169.94	5.64062	4.68132e-34
AT2TE17935	LINE/L1	ATLINE1_6	130.764	5.80546	6.88441e-34
AT4TE20815	DNA/En-Spm	ATENSPM5	170.3	5.49153	9.07252e-34
AT3TE62015	LTR/Gypsy	ATHILA2	158.474	5.66271	1.30778e-33
AT2TE27460	LTR/Gypsy	ATLANTYS1	210.046	5.51546	1.46858e-33
AT3TE52665	DNA/MuDR	VANDAL21	161.975	5.604	2.10181e-33
AT4TE16560	LTR/Gypsy	ATGP7	149.939	5.70869	2.57587e-33
AT5TE38020	DNA/Harbinger	ATIS112A	177.792	5.43735	3.02353e-33
AT3TE61615	LTR/Gypsy	ATHILA2	163.793	5.63861	3.12572e-33
AT1TE43865	LINE/L1	TA11	118.768	6.12859	3.54536e-33
AT3TE53850	LTR/Gypsy	ATGP7	658.392	5.92372	3.60947e-33
AT1TE46065	LTR/Gypsy	ATGP3	112.304	5.85211	4.67745e-33
AT4TE15705	DNA/HAT	ATHAT7	149.503	5.88132	5.80012e-33
AT3TE51825	LTR/Gypsy	ATGP1	101.419	6.31146	6.32962e-33
AT4TE21175	LTR/Gypsy	ATHILA5	137.492	5.72355	6.90894e-33
AT4TE12175	LTR/Copia	ATCOPIA69	104.214	6.15401	1.0699e-32
AT3TE70530	LTR/Gypsy	ATGP2N	166.495	5.19299	1.13061e-32
AT3TE59885	DNA/MuDR	ATMU9	160.612	5.56804	1.24541e-32
AT5TE36805	LINE/L1	ATLINE2	141.864	5.85197	1.34062e-32
AT5TE42350	LTR/Gypsy	ATHILA2	171.357	5.37459	1.63615e-32
AT4TE00230	LTR/Gypsy	ATGP2N	205.873	5.00904	2.50507e-32
AT2TE21500	LTR/Gypsy	ATHILA6A	128.164	5.93936	2.61305e-32
AT5TE48205	DNA/HAT	ATHAT7	148.292	5.70398	3.41314e-32
AT5TE46850	LTR/Gypsy	ATGP10	129.561	5.93474	3.73094e-32
AT3TE48590	LTR/Copia	ATCOPIA16	186.306	5.90089	3.73674e-32
AT5TE40675	LTR/Gypsy	ATHILA2	139.248	5.59035	3.80173e-32
AT2TE19565	DNA/En-Spm	ATENSPM10	97.908	6.10582	5.56818e-32
AT2TE24335	DNA/MuDR	ARNOLD2	185.021	5.48877	5.74807e-32
AT5TE44360	LTR/Gypsy	ATHILA2	151.811	5.64818	7.19713e-32
AT2TE16475	LTR/Gypsy	ATHILA2	107.954	5.8364	8.00876e-32
AT3TE54985	DNA/En-Spm	ATENSPM7	694.94	6.38099	9.96271e-32
AT5TE42865	LTR/Gypsy	ATHILA4C	111.461	5.66176	1.19641e-31
AT2TE26980	LINE/L1	TA11	101.239	5.84337	1.42833e-31
AT4TE13070	DNA/HAT	TAG2	154.97	5.28795	1.81854e-31
AT2TE26360	DNA/En-Spm	ATENSPM7	102.91	5.92045	1.8465e-31
AT1TE51245	LTR/Gypsy	ATGP2N	165.552	5.33772	2.04792e-31
AT5TE43070	LTR/Gypsy	ATGP7	169.913	5.52288	2.70997e-31
AT1TE54640	DNA/En-Spm	ATENSPM5	159.291	5.42797	2.73338e-31
AT3TE70590	DNA/MuDR	ARNOLD3	237.548	5.22914	2.91497e-31
AT3TE90530	LTR/Copia	ATCOPIA23	172.575	4.91804	2.96535e-31
AT5TE41770	DNA/En-Spm	ATENSPM11	150.044	5.28889	3.27586e-31
AT2TE16510	DNA/En-Spm	ATENSPM5	154.066	5.48357	4.18711e-31
AT2TE20030	DNA/En-Spm	ATENSPM11	135.355	5.5821	5.02964e-31
AT2TE21025	LTR/Gypsy	ATHILA	102.283	5.77056	6.10926e-31
AT5TE36160	LINE/L1	ATLINE2	94.2381	6.14083	7.42263e-31
AT5TE18885	DNA/MuDR	VANDAL12	113.971	5.61463	8.37846e-31
AT3TE52975	RC/Helitron	ATREP3	109.101	5.54267	8.519e-31
AT2TE17940	LTR/Gypsy	ATHILA2	118.798	5.62402	8.91984e-31
AT3TE53860	LTR/Gypsy	ATGP1	189.883	5.18043	9.28599e-31
AT1TE34315	DNA/En-Spm	ATENSPM10	106.38	5.68945	9.94885e-31
AT4TE19030	LTR/Gypsy	ATHILA4C	123.472	5.60226	1.21906e-30
AT2TE20450	LTR/Gypsy	ATLANTYS1	141.214	5.47173	1.86269e-30
AT3TE83700	SINE	ATSINE2A	172.224	5.01455	2.41432e-30
AT4TE09180	LINE/L1	ATLINE1_6	141.24	5.37838	2.52719e-30
AT5TE36330	LTR/Copia	ATCOPIA9	103.108	5.78871	5.16256e-30
AT4TE15555	LTR/Gypsy	ATGP10	183.225	5.72349	5.43771e-30
AT3TE59480	LTR/Gypsy	ATGP2	121.041	5.77462	6.46035e-30
AT5TE58755	LINE/L1	ATLINE2	158.968	5.31183	6.82755e-30
AT2TE00110	LTR/Gypsy	ATGP2	186.096	4.73832	7.94307e-30
AT5TE50260	LTR/Copia	ATCOPIA18A	126.801	5.15099	8.27315e-30
AT5TE47520	DNA/En-Spm	ATENSPM5	97.6853	5.78091	8.828e-30
AT1TE50945	LTR/Gypsy	ATHILA2	133.466	5.49768	1.00214e-29
AT4TE46310	DNA/MuDR	VANDAL12	155.032	5.37241	1.09833e-29
AT1TE47600	LTR/Gypsy	ATHILA5	144.73	5.86979	1.19522e-29
AT5TE43635	LTR/Gypsy	ATHILA0_I	124.71	5.50152	1.19522e-29
AT3TE68730	LTR/Copia	ATCOPIA79	102.469	6.04067	1.40523e-29
AT4TE21160	LTR/Gypsy	ATGP2N	133.522	5.13027	1.43758e-29
AT4TE18490	LTR/Gypsy	ATHILA5	88.176	5.94796	2.64903e-29
AT4TE13995	LTR/Gypsy	ATHILA6A	117.685	5.47646	2.90911e-29
AT1TE46390	LTR/Gypsy	ATHILA6B	89.0109	5.88568	3.19031e-29
AT3TE50295	DNA/MuDR	ARNOLD2	163.572	5.3497	3.39585e-29
AT1TE59135	DNA/MuDR	ATMU3	133.108	5.32047	3.49658e-29
AT5TE39590	DNA/HAT	ATHAT2	100.348	5.66732	6.51258e-29
AT5TE43800	LTR/Copia	ATCOPIA8A	98.8985	5.56237	7.7001e-29
AT5TE37985	LTR/Copia	ATCOPIA70	105.033	5.49889	1.0156e-28
AT2TE11015	DNA/MuDR	VANDAL17	118.201	5.41082	1.37767e-28
AT3TE62785	LINE/L1	ATLINE1_6	1112.34	5.64607	1.39486e-28
AT3TE45330	SINE	ATSINE2A	257.457	4.94146	1.69099e-28
AT1TE53380	LTR/Gypsy	ATHILA4D_LTR	132.587	5.42358	1.8737e-28
AT2TE09635	DNA/En-Spm	ATENSPM3	111.449	5.45441	1.96553e-28
AT2TE38245	DNA/MuDR	ATDNAI27T9A	229.112	3.77404	2.10463e-28
AT3TE52300	LTR/Gypsy	ATHILA4C	129.803	5.38901	2.41441e-28
AT4TE19655	LTR/Gypsy	ATGP7	176.977	4.46132	2.72224e-28
AT2TE18005	LTR/Gypsy	ATHILA	108.807	5.43511	3.36835e-28
AT3TE49420	DNA/En-Spm	ATENSPM9	122.286	5.63455	3.40113e-28
AT4TE15025	LTR/Gypsy	ATHILA0_I	144.275	5.56221	5.65649e-28
AT5TE38350	DNA/En-Spm	ATENSPM3	101.675	5.4571	7.13233e-28
AT5TE44750	LTR/Gypsy	ATHILA3	93.0834	5.61942	8.55438e-28
AT2TE26365	DNA/En-Spm	ATENSPM7	83.822	5.72972	9.356e-28
AT3TE62975	DNA/En-Spm	ATENSPM2	208.183	5.26692	1.07341e-27
AT4TE10680	DNA/En-Spm	ATENSPM11	113.182	5.39313	1.09194e-27
AT2TE34910	DNA/Harbinger	HARBINGER	116.298	5.06774	1.11187e-27
AT5TE24040	DNA/MuDR	ATDNAI27T9A	322.022	3.27696	1.48954e-27
AT2TE12230	LTR/Gypsy	ATGP2N	130.431	5.16193	1.55148e-27
AT2TE20035	RC/Helitron	HELITRONY1D	146.876	5.3722	1.6117e-27
AT3TE51290	DNA/En-Spm	ATENSPM9	110.929	5.37479	1.65661e-27
AT5TE43375	LTR/Gypsy	ATGP2N	145.163	4.99974	1.95789e-27
AT1TE46585	LTR/Gypsy	ATHILA2	121.215	5.30618	2.19544e-27
AT1TE39375	DNA/MuDR	VANDAL12	163.509	5.31777	2.33481e-27
AT2TE21855	LTR/Copia	ATCOPIA27	199.694	5.24253	2.70749e-27
AT4TE16165	LTR/Gypsy	ATLANTYS1	120.098	5.30127	4.8983e-27
AT5TE61740	LTR/Copia	ATCOPIA62	129.909	5.43054	5.19227e-27
AT5TE38355	DNA/En-Spm	ATENSPM7	100.641	5.4035	5.96502e-27
AT4TE18620	LTR/Gypsy	ATHILA5	108.707	5.33123	6.01164e-27
AT1TE51050	LTR/Gypsy	ATHILA6B	109.437	5.36654	6.30998e-27
AT2TE20965	LTR/Gypsy	ATGP2N	147.325	5.04807	7.87468e-27
AT3TE40125	DNA/MuDR	ATDNAI27T9A	263.223	3.69953	1.00093e-26
AT4TE14230	LTR/Gypsy	ATHILA5	96.7292	5.39973	1.5006e-26
AT4TE20570	DNA/En-Spm	ATENSPM3	94.0085	5.44664	1.5377e-26
AT3TE40530	DNA/MuDR	VANDAL14	370.802	3.55676	1.6075e-26
AT5TE46310	LTR/Gypsy	ATHILA0_I	93.9459	5.4371	1.67557e-26
AT5TE38635	LTR/Gypsy	ATHILA4	77.2837	5.72692	1.83441e-26
AT5TE65370	LTR/Copia	ATCOPIA21	199.636	4.81309	2.49504e-26
AT1TE40355	LTR/Copia	ATCOPIA60	79.2683	5.77812	2.62369e-26
AT2TE16665	LTR/Gypsy	ATHILA3	86.1577	5.471	2.88082e-26
AT2TE17640	LTR/Gypsy	ATHILA6A	91.6367	5.39404	5.13436e-26
AT5TE48725	DNA/Harbinger	ATIS112A	172.682	4.26124	5.15415e-26
AT2TE09500	LTR/Gypsy	ATGP3	129.917	4.77217	6.30546e-26
AT5TE43450	LTR/Gypsy	ATHILA6B	88.2157	5.38569	6.6468e-26
AT3TE54180	LTR/Gypsy	ATLANTYS2	171.49	5.12947	7.4836e-26
AT2TE14255	LTR/Gypsy	ATGP5	220.627	3.78762	7.89126e-26
AT5TE65330	DNA/MuDR	VANDAL14	372.317	3.49585	1.04725e-25
AT1TE51570	LTR/Gypsy	ATHILA6A	406.901	5.81388	1.56511e-25
AT2TE10260	DNA/En-Spm	ATENSPM7	121.641	5.15883	1.56639e-25
AT5TE42715	LTR/Gypsy	ATHILA6B	103.642	5.23247	1.83619e-25
AT1TE54655	LTR/Gypsy	ATHILA5	133.689	5.15271	1.93985e-25
AT2TE20835	LTR/Copia	ATCOPIA1	76.1329	5.6258	2.15766e-25
AT4TE14305	LTR/Gypsy	ATHILA2	110.174	5.18633	2.37115e-25
AT2TE21470	LTR/Gypsy	ATHILA6A	89.7145	5.49395	2.53564e-25
AT3TE57550	LTR/Gypsy	ATGP2N	208.662	4.70303	2.53639e-25
AT5TE45110	LTR/Gypsy	ATGP10	109.827	5.60522	3.92665e-25
AT4TE19040	LTR/Gypsy	ATHILA6A	116.23	5.13315	4.3345e-25
AT5TE46335	LTR/Gypsy	ATHILA5	76.3107	5.61696	4.62353e-25
AT1TE42400	LTR/Gypsy	ATGP3	95.9524	5.5024	4.73329e-25
AT3TE55020	LTR/Gypsy	ATHILA2	80.1893	5.40694	8.46841e-25
AT4TE09310	DNA/MuDR	ARNOLD3	146.313	5.1543	9.32725e-25
AT4TE18635	LTR/Gypsy	ATHILA0_I	84.2048	5.35839	9.5831e-25
AT5TE42930	LTR/Gypsy	ATHILA6A	84.5859	5.31109	1.20173e-24
AT3TE59855	LTR/Copia	ATCOPIA42	71.0427	5.598	1.59017e-24
AT1TE47725	LTR/Gypsy	ATHILA2	117.53	5.19287	2.4622e-24
AT1TE31190	DNA/MuDR	VANDAL2	130.899	4.86634	2.78199e-24
AT2TE13870	RC/Helitron	HELITRON5	99.0641	5.2067	2.99804e-24
AT2TE23965	DNA/MuDR	VANDAL13	103.644	5.12487	4.33588e-24
AT5TE41140	LTR/Gypsy	ATHILA6B	69.8144	5.55286	4.73055e-24
AT4TE15415	LTR/Gypsy	ATHILA5	93.5419	5.14376	5.27769e-24
AT4TE16175	LTR/Gypsy	ATHILA6A	114.958	5.10361	6.03547e-24
AT2TE23240	DNA/Harbinger	ATIS112A	268.993	4.65942	6.93793e-24
AT2TE54910	DNA/MuDR	VANDAL14	330.661	3.46943	7.08645e-24
AT3TE57085	LTR/Gypsy	ATLANTYS2	107.261	5.10479	7.4337e-24
AT5TE51000	LINE/L1	TA11	111.522	4.96813	7.84473e-24
AT4TE15615	DNA/MuDR	VANDAL21	94.0561	5.13648	8.23904e-24
AT5TE43985	LTR/Gypsy	ATHILA6A	95.1962	5.11947	8.84061e-24
AT1TE09080	DNA/MuDR	VANDAL14	370.555	3.39124	8.99368e-24
AT3TE51685	LTR/Gypsy	ATGP6	117.821	5.00326	9.6032e-24
AT2TE77015	LTR/Gypsy	ATGP9B	247.593	3.50712	1.12087e-23
AT4TE19145	LTR/Gypsy	ATHILA2	104.806	5.11042	1.12585e-23
AT5TE37360	LTR/Gypsy	ATHILA3	490.965	2.90816	2.01329e-23
AT1TE53385	LTR/Copia	ATCOPIA94	106.871	5.03669	2.39848e-23
AT5TE38280	LINE/L1	TA11	98.559	5.13155	2.40603e-23
AT2TE20000	DNA/En-Spm	ATENSPM3	106.755	5.0886	2.78609e-23
AT5TE50490	LINE/L1	ATLINE1_5	85.0455	5.21315	2.86167e-23
AT3TE60155	LTR/Gypsy	ATGP8	93.132	5.08611	3.02282e-23
AT1TE43035	LTR/Gypsy	ATGP7	100.088	5.08636	3.07582e-23
AT5TE38365	DNA/En-Spm	ATENSPM10	93.708	5.01958	3.7295e-23
AT2TE41090	DNA/HAT	SIMPLEHAT2	121.64	4.7485	4.84391e-23
AT2TE01560	LINE/L1	TA11	110.312	4.93886	5.46784e-23
AT3TE61070	LTR/Gypsy	ATHILA5	111.102	4.97316	5.76807e-23
AT3TE56045	LTR/Gypsy	ATGP7	79.3858	5.19926	7.37748e-23
AT5TE41145	LTR/Gypsy	ATHILA	64.4921	5.5076	8.65728e-23
AT2TE20930	LTR/Gypsy	ATHILA5	92.0411	4.98791	9.84808e-23
AT5TE46100	LTR/Gypsy	ATHILA3	502.715	5.65599	1.02505e-22
AT2TE11765	LTR/Gypsy	ATHILA2	86.4907	5.10401	1.11178e-22
AT1TE40345	LTR/Gypsy	TAT1_ATH	62.877	5.56982	1.49887e-22
AT5TE56780	LINE/L1	ATLINEIII	85.9859	5.27598	1.64638e-22
AT3TE62655	LINE/L1	TA11	100.962	5.41323	1.96968e-22
AT5TE52850	DNA/MuDR	ATMU4	158.093	4.92951	2.08499e-22
AT1TE45380	DNA/En-Spm	ATENSPM7	2491.72	5.55827	2.09763e-22
AT3TE58575	LTR/Gypsy	ATLANTYS3	533.24	5.51895	2.25116e-22
AT1TE49750	DNA/En-Spm	ATENSPM3	67.4308	5.55701	2.28108e-22
AT2TE20105	LTR/Gypsy	ATHILA3	83.5509	4.9732	2.28355e-22
AT4TE20950	LTR/Gypsy	ATHILA6A	64.6698	5.50424	2.81409e-22
AT5TE39085	LTR/Gypsy	ATHILA3	78.4427	5.10427	2.87063e-22
AT2TE11010	LTR/Gypsy	ATHILA	88.1456	5.03061	3.15977e-22
AT2TE06615	DNA/En-Spm	ATENSPM9	376.983	5.35488	3.50263e-22
AT5TE46760	LTR/Gypsy	ATHILA2	97.8583	5.03648	3.7959e-22
AT5TE56585	LTR/Copia	ATCOPIA25	89.4038	4.99619	4.14677e-22
AT4TE27185	DNA/MuDR	ATDNAI26T9	110.358	4.73822	4.56642e-22
AT5TE56560	DNA/HAT	TAG2	212.456	3.43566	4.56642e-22
AT1TE50870	LTR/Gypsy	ATHILA6A	84.4039	5.06102	5.17347e-22
AT5TE46970	DNA/MuDR	ARNOLD3	121.943	4.89839	5.28273e-22
AT4TE13515	Unassigned	Unassigned	83.5401	5.03696	5.50363e-22
AT3TE33960	DNA/MuDR	ATDNAI26T9	112.99	4.75398	6.03237e-22
AT5TE18895	DNA/MuDR	ATMU11	80.8494	5.13024	7.58457e-22
AT3TE56705	LTR/Gypsy	ATHILA6B	66.4734	5.3979	8.43411e-22
AT4TE16510	DNA/HAT	ATHAT2	90.9112	4.96954	9.47559e-22
AT4TE15835	LTR/Gypsy	ATGP10	984.336	5.44899	1.27816e-21
AT2TE10945	LTR/Gypsy	ATHILA4	102.611	5.03633	1.47863e-21
AT4TE09385	LTR/Gypsy	ATLANTYS1	128.869	4.74873	1.72159e-21
AT3TE54815	DNA/MuDR	ARNOLD3	96.451	4.85998	1.75144e-21
AT5TE47105	DNA/MuDR	VANDAL2	86.2215	4.95948	1.81551e-21
AT1TE44250	LTR/Gypsy	ATHILA4	67.4248	5.51045	1.86696e-21
AT2TE11555	DNA/En-Spm	ATENSPM1	90.0604	4.94851	1.88121e-21
AT2TE78320	SINE	ATSINE2A	181.653	3.71795	1.88776e-21
AT4TE07415	DNA/En-Spm	ATENSPM1A	109.478	4.97945	1.9911e-21
AT1TE45860	LTR/Gypsy	ATGP2N	127.993	4.56831	2.03664e-21
AT2TE20585	LTR/Gypsy	ATHILA4C	90.6082	4.92991	2.13726e-21
AT2TE00075	LTR/Gypsy	ATGP2	166.591	3.86111	2.30841e-21
AT5TE43860	DNA/En-Spm	ATENSPM3	60.2874	5.37849	2.39653e-21
AT2TE16385	LTR/Gypsy	ATHILA4	62.283	5.29628	3.02633e-21
AT4TE10165	LTR/Copia	ATCOPIA32B	62.7145	5.38328	3.07859e-21
AT4TE09000	DNA/MuDR	VANDAL3	104.443	4.89152	3.08047e-21
AT1TE76735	RC/Helitron	HELITRONY1E	132.854	4.75132	3.52535e-21
AT4TE18710	LTR/Gypsy	ATHILA2	103.215	4.94224	3.9716e-21
AT5TE41835	LTR/Gypsy	ATHILA6A	105.783	4.78525	5.64298e-21
AT4TE16750	LTR/Gypsy	ATHILA4B_LTR	86.2158	4.93224	7.07705e-21
AT3TE58580	LTR/Gypsy	ATLANTYS1	845.347	5.4283	7.70384e-21
AT4TE09925	LTR/Gypsy	ATGP5	111.979	4.78962	8.6747e-21
AT4TE10980	LINE/L1	TA11	82.4803	4.89807	9.06231e-21
AT5TE38345	DNA/En-Spm	ATENSPM3	66.9698	5.07799	9.80172e-21
AT5TE36720	DNA/En-Spm	ATENSPM2	102.733	4.81732	9.91389e-21
AT3TE48170	LTR/Gypsy	ATGP3	58.3932	5.40143	1.01894e-20
AT2TE16590	LTR/Gypsy	ATHILA2	98.5961	4.85482	1.0223e-20
AT1TE08240	DNA/HAT	TAG2	169.587	3.69614	1.15229e-20
AT1TE47340	LTR/Gypsy	ATHILA3	69.5705	4.96817	1.41507e-20
AT2TE20945	LTR/Gypsy	ATGP2N	119.155	4.71986	1.45796e-20
AT5TE74320	DNA/HAT	ATHAT1	87.1897	4.85775	1.54304e-20
AT4TE14245	LTR/Gypsy	ATHILA0_I	81.0161	4.94833	1.69809e-20
AT4TE15295	LTR/Gypsy	ATHILA2	82.5115	4.92004	1.7344e-20
AT2TE25355	DNA/MuDR	ATMU5	86.3049	4.88073	1.82917e-20
AT5TE52855	DNA/MuDR	ATMU1	155.099	4.8519	2.37081e-20
AT3TE47770	DNA/En-Spm	ATENSPM5	79.0622	4.9073	2.9423e-20
AT4TE15275	LTR/Gypsy	ATHILA2	83.8672	4.86253	3.048e-20
AT5TE50155	RC/Helitron	HELITRONY3	103.213	4.86818	3.36465e-20
AT3TE50660	LTR/Gypsy	ATHILA6B	80.9586	5.00068	3.37015e-20
AT2TE29450	LTR/Copia	ATCOPIA70	111.96	4.41572	3.84602e-20
AT3TE59615	LTR/Gypsy	ATHILA2	79.7219	4.90268	3.91821e-20
AT3TE55350	LTR/Gypsy	ATHILA2	73.5094	4.90467	4.39907e-20
AT5TE86410	DNA/En-Spm	ATENSPM9	112.805	4.24753	4.42749e-20
AT2TE28260	LTR/Copia	ATCOPIA38	72.0618	4.82853	4.4381e-20
AT3TE50575	LTR/Gypsy	ATHILA3	75.5725	4.91024	4.52003e-20
AT4TE09080	DNA/MuDR	VANDAL21	112.54	4.52951	4.58956e-20
AT3TE57350	LTR/Gypsy	ATHILA6A	79.9129	4.93248	5.03032e-20
AT3TE60190	LTR/Gypsy	ATHILA5	74.4225	4.9138	5.15614e-20
AT4TE18730	LTR/Gypsy	ATHILA5	73.4633	4.86965	6.4658e-20
AT4TE17185	DNA/En-Spm	ATENSPM11	61.8362	5.04893	7.29259e-20
AT5TE47170	DNA/En-Spm	ATENSPM6	86.5885	4.87985	7.61901e-20
AT2TE41175	RC/Helitron	HELITRONY1D	165.255	3.82038	8.62201e-20
AT1TE44910	DNA/MuDR	VANDAL21	93.8725	4.77259	8.67239e-20
AT5TE42320	LTR/Gypsy	ATHILA5	98.2224	4.8584	8.98789e-20
AT2TE25360	DNA/MuDR	ATMU5	81.9292	4.83087	1.03743e-19
AT5TE37800	LINE/L1	TA11	475.2	5.10181	1.05067e-19
AT1TE46275	DNA/HAT	ATHAT1	69.1901	4.93476	1.36868e-19
AT5TE37400	LTR/Gypsy	ATGP2	70.9022	4.76056	1.42766e-19
AT5TE36620	LINE/L1	ATLINE1_6	119.636	4.96004	1.42921e-19
AT1TE51475	LTR/Gypsy	ATHILA6A	87.4333	4.82427	1.47671e-19
AT2TE12310	LTR/Gypsy	ATHILA4A	120.317	4.62552	1.61186e-19
AT2TE16850	LTR/Gypsy	ATHILA5	75.6753	4.85319	1.79388e-19
AT3TE55470	LTR/Gypsy	ATGP7	66.9941	4.94698	1.87111e-19
AT1TE51070	LTR/Gypsy	ATHILA6A	65.4947	4.92268	1.91073e-19
AT5TE45000	DNA/En-Spm	ATENSPM5	137.695	4.1942	2.06817e-19
AT5TE43810	LTR/Gypsy	ATHILA2	84.0919	4.73626	2.11216e-19
AT5TE46835	LTR/Gypsy	ATGP10	61.775	5.00938	2.73609e-19
AT3TE59045	DNA	ATDNA12T3_2	79.8104	4.76453	3.75658e-19
AT5TE43205	LTR/Gypsy	ATGP1	90.9426	4.82482	4.13009e-19
AT5TE37380	LTR/Gypsy	ATGP2	73.4582	4.66277	4.95619e-19
AT5TE36235	Unassigned	SADHU	88.8681	4.65569	5.33147e-19
AT1TE46395	LTR/Gypsy	ATHILA2	53.9155	5.18242	6.84161e-19
AT5TE40350	LTR/Gypsy	ATGP2	89.9807	4.50097	7.08755e-19
AT4TE18015	LTR/Gypsy	ATHILA4	55.4941	5.18777	7.41622e-19
AT5TE37370	LTR/Gypsy	ATGP2	72.0686	4.67893	7.42968e-19
AT5TE42935	LTR/Gypsy	ATHILA2	59.5889	4.92738	7.47924e-19
AT2TE19480	LTR/Gypsy	ATHILA	89.353	4.83712	9.04572e-19
AT5TE36140	DNA/MuDR	ATMU11	59.2283	4.9133	9.26747e-19
AT4TE40695	LTR/Copia	ATCOPIA48	103.399	4.06548	9.28816e-19
AT2TE25540	LTR/Gypsy	ATGP1	184.061	3.97853	1.11527e-18
AT4TE06710	LTR/Copia	ATCOPIA2	184.808	3.39906	1.22566e-18
AT1TE47125	LTR/Gypsy	ATHILA3	60.9646	4.86773	1.29595e-18
AT5TE43275	LTR/Gypsy	ATHILA6A	129.518	4.73123	1.39657e-18
AT2TE18980	LTR/Gypsy	ATGP1	116.363	4.00725	1.69405e-18
AT5TE50150	RC/Helitron	HELITRONY3	103.564	4.53435	1.78521e-18
AT2TE21755	LTR/Gypsy	ATHILA0_I	64.329	4.77281	1.80403e-18
AT5TE48550	LINE/L1	ATLINE1_2	79.8469	4.9263	1.89695e-18
AT5TE40580	DNA/En-Spm	ATENSPM5	82.6685	4.72127	2.29281e-18
AT2TE10495	LTR/Copia	ATCOPIA58	68.7419	4.98705	2.6834e-18
AT1TE54000	LTR/Gypsy	ATGP3	74.7643	4.86567	2.94988e-18
AT3TE63215	DNA/MuDR	VANDAL8	94.7413	4.61259	3.2991e-18
AT2TE13750	DNA/MuDR	VANDAL3	76.9002	4.73899	4.3649e-18
AT5TE58750	LINE/L1	ATLINEIII	83.4923	4.64837	4.92713e-18
AT5TE46015	LTR/Gypsy	ATHILA3	68.1712	4.88951	5.83216e-18
AT2TE26685	LTR/Gypsy	ATHILA4A	77.856	4.72768	6.86437e-18
AT3TE57225	LTR/Gypsy	ATHILA3	74.9425	5.03842	8.56344e-18
AT2TE17555	LTR/Gypsy	ATHILA3	77.0575	4.6781	9.84823e-18
AT5TE43265	LTR/Gypsy	ATHILA6B	67.9579	4.75363	1.06969e-17
AT5TE40180	LTR/Gypsy	ATHILA2	52.1385	4.96524	1.174e-17
AT2TE09720	DNA/HAT	ATHAT2	70.8375	4.6588	1.37613e-17
AT2TE18440	LTR/Gypsy	ATHILA2	71.5	4.74421	1.4504e-17
AT1TE47765	LTR/Gypsy	ATHILA2	73.9445	4.64273	1.56307e-17
AT2TE16870	LTR/Gypsy	ATHILA6A	65.5633	4.69047	1.61331e-17
AT1TE56390	LTR/Copia	ATCOPIA79	50.426	5.03064	1.81075e-17
AT3TE55240	LTR/Gypsy	ATHILA6A	53.8321	5.03272	2.04631e-17
AT2TE20580	LTR/Gypsy	ATHILA4A	71.9087	4.64615	2.04872e-17
AT1TE46645	LTR/Gypsy	ATHILA4	46.7948	5.07033	2.06098e-17
AT1TE47580	LTR/Gypsy	ATHILA3	53.6451	4.86317	2.2543e-17
AT3TE67540	LTR/Gypsy	ATGP3	70.5191	4.69195	2.53613e-17
AT5TE37670	LTR/Gypsy	ATGP7	59.3413	4.69754	3.16089e-17
AT2TE12315	LTR/Gypsy	ATGP5	108.127	4.43564	3.67764e-17
AT5TE46110	LTR/Gypsy	ATHILA	64.9349	4.7558	4.07743e-17
AT4TE44395	DNA/HAT	ATHAT1	95.7223	4.47104	4.26743e-17
AT5TE30935	LTR/Gypsy	ATHILA	71.6764	4.67258	4.47312e-17
AT3TE67295	LINE/L1	ATLINE1_1	57.8111	4.83573	6.17975e-17
AT5TE62545	LINE/L1	ATLINE1_1	72.6131	4.59797	6.54906e-17
AT3TE48140	DNA/En-Spm	ATENSPM10	65.6318	4.60371	6.70409e-17
AT3TE57175	LTR/Gypsy	ATHILA2	58.3046	4.76491	7.33665e-17
AT1TE41460	DNA/MuDR	VANDAL2	103.304	4.46842	8.17325e-17
AT2TE11305	LINE/L1	ATLINE1_6	54.1429	4.83744	9.34122e-17
AT3TE56635	LTR/Gypsy	ATHILA2	47.6097	4.95932	1.17543e-16
AT3TE37060	DNA/MuDR	VANDAL2	98.3747	4.45899	1.58734e-16
AT2TE28955	LINE/L1	ATLINE1_5	89.9969	4.21993	1.63205e-16
AT2TE05675	LINE/L1	ATLINE2	76.8722	4.59002	1.66755e-16
AT5TE39230	DNA/MuDR	VANDAL8	126.09	4.12971	1.67776e-16
AT1TE46810	LTR/Gypsy	ATHILA3	44.8536	4.96571	1.78465e-16
AT2TE41170	DNA/Harbinger	ATIS112A	194.232	3.35526	1.91058e-16
AT1TE37220	DNA/MuDR	VANDAL7	66.8396	4.56401	2.06715e-16
AT2TE18875	DNA/MuDR	VANDAL20	66.4713	4.45596	2.28169e-16
AT5TE44230	LTR/Gypsy	ATHILA2	67.6522	4.57429	2.312e-16
AT5TE48980	DNA/MuDR	ATMU11	55.9328	4.76354	2.47517e-16
AT3TE51815	LTR/Gypsy	ATHILA	43.3603	4.98944	2.76769e-16
AT4TE09505	DNA/MuDR	ARNOLD2	80.3018	4.52081	2.82663e-16
AT3TE59205	LTR/Gypsy	ATHILA4	44.9299	4.9928	3.05674e-16
AT5TE50115	RC/Helitron	HELITRONY3	60.3981	4.5575	3.05716e-16
AT4TE12615	DNA/MuDR	VANDAL2	93.3479	4.37549	3.10954e-16
AT5TE44190	DNA/En-Spm	ATENSPM9	84.5222	4.29308	3.11949e-16
AT5TE46345	LTR/Gypsy	ATHILA5	53.0024	4.76935	3.63045e-16
AT4TE16845	DNA/En-Spm	ATENSPM9	66.5537	4.56251	3.76472e-16
AT2TE09600	RC/Helitron	ATREP12	52.4109	4.70695	5.0644e-16
AT1TE57530	LTR/Copia	ATCOPIA49	60.0674	4.79857	5.82455e-16
AT1TE47195	LTR/Gypsy	ATHILA7A	67.0493	4.73612	5.95838e-16
AT1TE47415	LTR/Gypsy	ATHILA7A	67.0493	4.73612	5.95838e-16
AT2TE23200	DNA/En-Spm	ATENSPM9	72.0941	4.50236	6.19284e-16
AT3TE59495	LTR/Gypsy	ATGP10	55.2841	4.8107	6.47695e-16
AT5TE35185	RC/Helitron	HELITRON4	68.7575	4.8164	6.49164e-16
AT2TE23205	DNA/En-Spm	ATENSPM6	75.9036	4.51626	6.96903e-16
AT4TE12620	LTR/Gypsy	ATGP2N	155.824	3.82456	8.3892e-16
AT4TE08455	LTR/Gypsy	ATHILA3	56.8522	4.69058	8.83533e-16
AT1TE45865	DNA/En-Spm	ATENSPM5	58.8583	4.57075	9.34455e-16
AT3TE45980	LTR/Gypsy	ATGP1	126.366	3.67985	9.80824e-16
AT1TE51260	LTR/Gypsy	ATLANTYS2	55.7258	4.65332	1.09592e-15
AT1TE38530	DNA/MuDR	ARNOLD2	83.4795	4.35477	1.18726e-15
AT4TE16870	LTR/Gypsy	ATLANTYS1	47.5703	4.70736	1.31621e-15
AT1TE40940	LTR/Gypsy	ATGP2N	157.386	3.56097	2.06083e-15
AT1TE53825	DNA/MuDR	ATDNA1T9A	81.1185	4.32192	2.11879e-15
AT5TE37350	DNA/MuDR	VANDAL1	714.494	2.36027	2.18676e-15
AT5TE26805	DNA/MuDR	ATDNAI27T9B	75.0529	4.35353	2.2027e-15
AT5TE40520	DNA/En-Spm	ATENSPM6	71.4899	4.43899	2.22676e-15
AT3TE57210	LTR/Gypsy	ATHILA3	44.3732	4.75899	2.34172e-15
AT3TE58625	LTR/Gypsy	ATHILA5	53.305	4.55423	2.43313e-15
AT5TE52845	DNA/MuDR	ATMU11	111.322	4.41624	2.55878e-15
AT2TE20665	LTR/Gypsy	ATGP5	83.2154	4.31188	2.80298e-15
AT2TE18695	DNA/MuDR	VANDAL20	47.714	4.64903	3.14696e-15
AT4TE17070	LTR/Gypsy	ATHILA2	139.026	4.37763	3.31418e-15
AT4TE14445	LTR/Gypsy	ATGP2N	76.1461	4.38231	4.08037e-15
AT4TE13560	LTR/Gypsy	ATGP2N	65.1199	4.44476	4.84712e-15
AT5TE45075	LTR/Gypsy	ATGP10	51.7966	4.58735	5.07245e-15
AT3TE57100	LTR/Gypsy	ATGP10	80.8517	4.55547	5.13604e-15
AT3TE61295	LTR/Gypsy	ATGP2	59.5188	4.41712	5.25047e-15
AT3TE57125	LTR/Gypsy	ATHILA6B	49.2447	4.62488	5.63e-15
AT3TE54770	LTR/Gypsy	ATHILA2	61.2561	4.45232	6.18881e-15
AT2TE21420	LTR/Gypsy	ATHILA2	49.4529	4.54437	6.62712e-15
AT5TE66505	DNA/MuDR	VANDAL6	81.8358	4.30324	7.37515e-15
AT2TE17560	LTR/Gypsy	ATHILA8B	66.0546	4.4207	7.8082e-15
AT3TE61050	LTR/Gypsy	ATHILA3	58.0921	4.47992	8.34151e-15
AT1TE57045	DNA/HAT	TAG2	58.4758	4.48614	8.36754e-15
AT3TE51135	LTR/Gypsy	ATHILA3	54.0504	4.44678	8.76137e-15
AT4TE10700	LTR/Copia	ATCOPIA10	52.4756	4.48697	1.03916e-14
AT4TE15115	Unassigned	Unassigned	63.9701	4.41932	1.03916e-14
AT5TE46865	DNA/HAT	ATHAT1	91.9947	3.79026	1.3109e-14
AT5TE41775	DNA/En-Spm	ATENSPM10	63.6581	4.38701	1.55134e-14
AT3TE50775	LTR/Gypsy	ATGP1	76.6857	4.16653	1.57234e-14
AT5TE00480	Unassigned	Unassigned	635.439	4.66671	1.57492e-14
AT3TE52450	RC/Helitron	HELITRON4	39.3227	4.72532	1.89639e-14
AT4TE10255	Unassigned	Unassigned	52.8121	4.45543	1.92018e-14
AT3TE51760	DNA/MuDR	VANDAL17	67.1159	4.40911	2.04151e-14
AT3TE50055	LTR/Gypsy	ATHILA7	47.7587	4.52171	2.10607e-14
AT1TE45180	LTR/Gypsy	ATHILA6A	51.9161	4.56834	2.31536e-14
AT3TE53495	LINE/L1	TA11	58.9583	4.37882	2.4073e-14
AT2TE20920	LTR/Gypsy	ATHILA	62.8131	4.39752	2.6767e-14
AT4TE13985	LTR/Gypsy	ATGP10	54.3672	4.41774	2.80262e-14
AT2TE18825	LTR/Gypsy	ATGP3	109.165	4.16355	2.88314e-14
AT3TE47595	LTR/Gypsy	ATGP2	77.7159	4.1746	3.02934e-14
AT1TE41485	DNA/MuDR	ATDNAI27T9B	74.4378	4.33901	3.11724e-14
AT3TE61160	DNA/En-Spm	ATENSPM9	344.184	4.72163	3.32146e-14
AT5TE47750	LINE/L1	ATLINEIII	131.283	3.66814	3.47019e-14
AT4TE13295	LTR/Gypsy	ATHILA2	61.7603	4.40858	3.47387e-14
AT1TE48230	LTR/Gypsy	ATHILA3	39.8673	4.65315	3.67954e-14
AT1TE43440	LTR/Gypsy	ATGP8	38.4962	4.72815	3.91063e-14
AT3TE59160	LTR/Gypsy	ATHILA2	53.0889	4.39134	4.22411e-14
AT3TE59025	LTR/Gypsy	ATHILA0_I	63.5269	4.33546	4.57175e-14
AT5TE08870	LTR/Copia	ATCOPIA18	48.4456	4.50274	5.05081e-14
AT1TE46965	DNA/En-Spm	ATENSPM9	50.6744	4.64438	5.18537e-14
AT1TE47190	LTR/Gypsy	ATHILA7	45.5715	4.54354	5.80553e-14
AT1TE47410	LTR/Gypsy	ATHILA7	45.5715	4.54354	5.80553e-14
AT4TE09510	DNA/MuDR	ARNOLD2	68.7558	4.29558	6.12164e-14
AT4TE38400	LTR/Gypsy	ATGP9B	115.051	3.83656	6.57844e-14
AT3TE59455	DNA/MuDR	VANDAL3	70.5573	4.44665	6.68448e-14
AT2TE18860	LTR/Gypsy	ATHILA6A	40.15	4.57243	7.0985e-14
AT5TE18470	DNA/MuDR	ATMU10	107.92	4.07003	9.07862e-14
AT5TE51970	DNA/MuDR	VANDAL2	82.2414	4.13364	9.49883e-14
AT3TE50970	LTR/Gypsy	ATHILA2	54.0689	4.35783	1.02024e-13
AT5TE40835	DNA/MuDR	ATMU10	43.6612	4.47428	1.15362e-13
AT3TE52540	DNA/MuDR	VANDAL21	76.0924	4.09317	1.28713e-13
AT1TE47715	LTR/Gypsy	ATHILA8A	43.358	4.48793	1.43207e-13
AT4TE21200	LTR/Gypsy	ATHILA3	47.1836	4.35779	1.47992e-13
AT5TE52200	DNA/MuDR	VANDAL2	96.5713	3.92918	1.4816e-13
AT4TE15805	LTR/Gypsy	ATHILA6A	42.9964	4.47568	1.63602e-13
AT3TE40135	DNA/MuDR	LIMPET1	101.276	3.82441	1.95677e-13
AT4TE17100	LTR/Copia	ATCOPIA41	85.6783	4.3283	2.0718e-13
AT3TE53845	LTR/Gypsy	ATGP5	69.0974	4.5588	2.13871e-13
AT1TE29060	DNA/MuDR	VANDAL2	112.23	3.94544	2.18836e-13
AT1TE47300	LTR/Gypsy	ATGP10	51.43	4.44349	2.23719e-13
AT1TE47520	LTR/Gypsy	ATGP10	51.43	4.44349	2.23719e-13
AT1TE42490	LTR/Copia	ATCOPIA95	84.4219	4.14341	2.35086e-13
AT2TE16365	DNA/En-Spm	ATENSPM11	41.5181	4.48854	2.56631e-13
AT2TE38255	DNA/MuDR	LIMPET1	123.433	3.50466	2.63783e-13
AT5TE24050	DNA/MuDR	LIMPET1	136.722	3.36976	2.67129e-13
AT2TE20435	LTR/Gypsy	ATLANTYS1	74.599	4.1727	2.68128e-13
AT1TE44525	LTR/Gypsy	ATHILA4	43.7893	4.53023	2.79604e-13
AT5TE39055	LTR/Gypsy	ATHILA6B	35.7043	4.64892	3.13899e-13
AT5TE45080	LTR/Gypsy	ATHILA0_I	49.5579	4.32903	3.17811e-13
AT2TE20905	LTR/Gypsy	ATHILA3	119.942	3.34787	3.49934e-13
AT5TE32880	DNA/HAT	ATHAT1	53.1467	4.27515	4.21519e-13
AT1TE46315	LTR/Gypsy	ATHILA0_I	43.2111	4.403	4.71614e-13
AT3TE58585	LTR/Gypsy	ATLANTYS2	66.866	4.45665	5.2066e-13
AT4TE09805	LTR/Copia	ATCOPIA20	41.7155	4.41219	5.56225e-13
AT1TE48715	LTR/Gypsy	ATHILA6A	36.7735	4.56412	5.60814e-13
AT2TE20670	LTR/Gypsy	ATGP5	66.1637	4.17872	5.85648e-13
AT2TE16960	DNA/En-Spm	ATENSPM7	64.2737	4.17266	5.87993e-13
AT5TE46155	DNA/MuDR	VANDAL20	94.1691	4.39309	6.74351e-13
AT1TE47050	LTR/Gypsy	ATHILA2	55.4589	4.22554	7.22882e-13
AT5TE25460	DNA/MuDR	VANDAL20	46.8664	4.22001	8.3146e-13
AT2TE02465	DNA/MuDR	ARNOLD1	88.7781	4.0821	8.86559e-13
AT3TE59200	LTR/Gypsy	ATHILA0_I	49.0348	4.25969	8.92511e-13
AT5TE54515	DNA/MuDR	ATMU11	61.8597	4.209	9.00741e-13
AT5TE34960	DNA	ATDNA12T3_2	55.7965	4.17785	9.43697e-13
AT5TE46000	DNA/En-Spm	ATENSPM6	33.8662	4.57864	1.12788e-12
AT3TE54455	LTR/Gypsy	ATGP3	37.7944	4.44661	1.13699e-12
AT3TE61610	LTR/Gypsy	ATHILA	54.697	4.16066	1.29957e-12
AT2TE23670	LTR/Gypsy	ATGP1	90.1312	3.68502	1.42652e-12
AT2TE16170	DNA/En-Spm	ATENSPM10	193.807	4.53829	1.47833e-12
AT2TE15410	LTR/Gypsy	ATGP10	49.0066	4.42728	1.6804e-12
AT1TE51925	DNA/MuDR	ATDNAI26T9	35.7992	4.43964	1.731e-12
AT2TE13145	DNA/MuDR	ARNOLD4	89.1628	4.06328	1.75013e-12
AT4TE16505	DNA/HAT	ATHAT7	52.8354	4.18927	1.78028e-12
AT5TE44890	Unassigned	Unassigned	60.2905	4.12769	1.86538e-12
AT1TE51950	DNA/En-Spm	ATENSPM1A	41.3075	4.43037	2.00063e-12
AT4TE08945	LTR/Gypsy	ATHILA2	46.5578	4.29443	2.20062e-12
AT4TE09130	LINE/L1	ATLINEIII	53.3651	4.19116	2.27811e-12
AT2TE10265	DNA/En-Spm	ATENSPM3	55.9842	4.16821	2.91085e-12
AT3TE64600	LTR/Copia	ATCOPIA41	32.8667	4.52658	2.91843e-12
AT2TE16600	LTR/Gypsy	ATHILA	39.3218	4.32112	3.03418e-12
AT4TE20945	LTR/Gypsy	ATGP1	33.7028	4.48817	3.09545e-12
AT2TE17115	LTR/Gypsy	ATHILA6A	45.9028	4.23094	3.22613e-12
AT5TE45020	DNA/En-Spm	ATENSPM6	37.1733	4.39521	3.85381e-12
AT3TE57160	LTR/Gypsy	ATGP10	62.2075	4.22655	5.42436e-12
AT2TE19540	DNA/En-Spm	ATENSPM11	37.2437	4.38564	5.49987e-12
AT3TE57295	DNA/En-Spm	ATENSPM11	33.3146	4.40604	5.8245e-12
AT5TE93055	DNA/HAT	ATHAT1	112.113	3.52613	6.03485e-12
AT4TE18500	LTR/Gypsy	ATLANTYS1	57.2835	4.05078	7.10722e-12
AT1TE47735	LTR/Gypsy	ATHILA2	43.6686	4.20258	7.19117e-12
AT4TE38410	LTR/Gypsy	ATGP9B	69.6606	3.80419	7.23569e-12
AT1TE70805	LINE/L1	ATLINE1_1	63.7351	4.07868	7.67837e-12
AT2TE20915	LTR/Gypsy	ATHILA0_I	51.9403	4.01592	7.84006e-12
AT1TE47475	LTR/Gypsy	ATHILA3	45.605	4.15312	7.90235e-12
AT2TE20605	LTR/Gypsy	ATHILA4C	50.7238	4.10067	8.32975e-12
AT3TE63180	DNA/Harbinger	ATIS112A	75.9753	4.00618	8.46694e-12
AT3TE51655	LTR/Gypsy	ATHILA6A	82.4341	3.97718	9.28696e-12
AT1TE45960	LTR/Copia	ATCOPIA29	42.7123	4.30745	9.95973e-12
AT1TE44720	LTR/Gypsy	ATGP1	85.6744	3.56108	1.01093e-11
AT3TE59085	LTR/Gypsy	ATHILA6B	48.5769	4.38303	1.04609e-11
AT3TE54330	LINE/L1	ATLINE1_6	53.2494	3.97439	1.06071e-11
AT1TE52160	LTR/Gypsy	ATHILA4A	34.2048	4.39522	1.15418e-11
AT1TE44875	DNA/MuDR	ATDNAI26T9	65.7165	4.05755	1.18287e-11
AT5TE47515	LTR/Gypsy	ATHILA0_I	43.1501	4.21011	1.18674e-11
AT1TE48855	LTR/Gypsy	ATHILA6A	32.3417	4.42471	1.21421e-11
AT1TE47255	LTR/Gypsy	ATHILA3	46.5442	4.08282	1.2766e-11
AT1TE46700	LTR/Gypsy	ATHILA	49.6712	4.25949	1.35001e-11
AT5TE43440	LTR/Gypsy	ATHILA6A	44.7088	4.16928	1.37927e-11
AT4TE16540	LTR/Gypsy	ATGP7	42.257	4.15943	1.43087e-11
AT2TE16800	LTR/Gypsy	ATLANTYS3	48.5469	4.05457	1.47189e-11
AT3TE57060	LTR/Gypsy	ATLANTYS1	49.1755	3.99839	1.48753e-11
AT1TE47200	LTR/Gypsy	ATHILA8A	39.0345	4.23186	1.58945e-11
AT1TE47420	LTR/Gypsy	ATHILA8A	39.0345	4.23186	1.58945e-11
AT3TE60635	LTR/Copia	ATCOPIA34	33.3744	4.34062	1.65203e-11
AT5TE41800	DNA/En-Spm	ATENSPM9	47.4389	4.19563	1.70134e-11
AT5TE44420	DNA/Harbinger	HARBINGER	41.3389	4.20964	1.79048e-11
AT5TE47150	LTR/Gypsy	ATHILA0_I	43.0296	4.19642	1.86064e-11
AT4TE08450	DNA/En-Spm	ATENSPM2	42.7663	4.30937	1.88029e-11
AT4TE64180	LTR/Copia	ATCOPIA8B	477.636	4.28827	1.91426e-11
AT1TE51775	DNA/HAT	ATHAT1	80.213	3.47426	2.25672e-11
AT5TE81385	LTR/Copia	ATCOPIA13	108.596	3.80769	2.51417e-11
AT4TE09560	LTR/Gypsy	ATLANTYS2	108.615	3.87566	2.51683e-11
AT4TE05580	LINE/L1	ATLINE2	45.879	4.01158	2.63293e-11
AT3TE54820	DNA/MuDR	ARNOLD2	54.1998	4.15096	2.73816e-11
AT1TE55920	LTR/Gypsy	ATHILA8B	91.9606	3.29097	2.90502e-11
AT4TE15525	LTR/Gypsy	ATGP10	54.8784	4.1707	2.93118e-11
AT3TE62260	DNA/MuDR	VANDAL2	75.4463	3.85266	3.34763e-11
AT2TE13345	DNA/Pogo	ATHPOGON1	53.8351	4.0533	3.54954e-11
AT2TE77005	LTR/Gypsy	ATGP9B	116.693	3.59709	3.96627e-11
AT4TE14085	DNA/En-Spm	ATENSPM10	35.1841	4.22185	4.06304e-11
AT1TE51235	LTR/Gypsy	ATHILA	50.9351	3.99651	4.30565e-11
AT3TE59210	LTR/Gypsy	ATHILA4A	31.5467	4.36101	4.66754e-11
AT5TE39640	DNA/Harbinger	ATIS112A	67.9127	4.02839	5.48901e-11
AT4TE08355	LTR/Gypsy	ATGP1	63.7295	3.7821	5.53318e-11
AT1TE42410	LINE/L1	TA11	34.6042	4.17237	6.63589e-11
AT3TE59970	DNA/MuDR	ATDNAI27T9B	57.4798	3.96982	7.30853e-11
AT3TE51075	LTR/Gypsy	ATHILA3	42.9934	3.99749	7.42834e-11
AT4TE21910	LTR/Gypsy	ATGP1	38.9681	4.08979	7.89669e-11
AT4TE14500	LTR/Gypsy	ATHILA3	38.2525	4.13022	7.95558e-11
AT4TE15195	DNA/En-Spm	ATENSPM7	32.2714	4.26085	8.13251e-11
AT4TE17505	LTR/Gypsy	ATHILA	72.0851	4.07213	8.16016e-11
AT2TE19515	LTR/Gypsy	ATHILA	44.5309	4.09775	8.30168e-11
AT4TE45190	DNA/MuDR	VANDAL8	52.0983	3.98576	9.00706e-11
AT3TE61400	DNA/MuDR	ATMU10	49.0223	4.17422	9.01561e-11
AT3TE53130	DNA/En-Spm	ATENSPM6	47.1884	4.04477	9.28633e-11
AT2TE37435	RC/Helitron	ATREP12	77.6789	3.62107	1.0483e-10
AT5TE36155	LINE/L1	ATLINEIII	29.3434	4.28227	1.06385e-10
AT5TE18900	DNA/MuDR	ATMU4	36.5803	4.11112	1.18089e-10
AT2TE18025	LINE/L1	ATLINE1_6	45.0105	4.03737	1.24306e-10
AT5TE36725	RC/Helitron	ATREP10B	53.6791	3.98153	1.27687e-10
AT3TE54840	LINE/L1	ATLINE1_6	32.3167	4.16474	1.48906e-10
AT5TE42880	LTR/Gypsy	ATHILA4C	28.453	4.27787	1.60703e-10
AT2TE16880	LTR/Gypsy	ATHILA2	44.0667	4.00881	1.82529e-10
AT2TE21225	LINE/L1	ATLINE1_4	35.0474	4.15774	1.96787e-10
AT3TE56725	LTR/Gypsy	ATHILA2	28.1743	4.24924	2.11951e-10
AT5TE36730	RC/Helitron	ATREP3	49.1573	3.96196	2.14802e-10
AT5TE48990	DNA/MuDR	ATMU10	34.6791	4.09024	2.51954e-10
AT5TE40190	LTR/Gypsy	ATHILA6B	30.7355	4.25485	2.80876e-10
AT5TE40385	LTR/Gypsy	ATGP10	34.938	4.15377	2.98663e-10
AT1TE51275	LTR/Gypsy	ATGP5	37.2522	4.03688	3.32101e-10
AT3TE66875	LINE/L1	ATLINE2	53.2899	3.84585	3.55771e-10
AT3TE67635	LTR/Copia	ATCOPIA32	30412.1	4.30986	3.57721e-10
AT2TE11360	LTR/Gypsy	ATHILA6A	35.0665	4.16277	3.6257e-10
AT2TE26875	DNA/HAT	ATHAT1	37.1744	4.0024	3.73943e-10
AT3TE47780	DNA/En-Spm	ATENSPM2	41.6438	3.95519	3.85583e-10
AT3TE59485	LTR/Gypsy	ATGP10	30.5469	4.16408	4.19046e-10
AT1TE52130	LTR/Gypsy	ATHILA2	44.1319	3.93661	4.34747e-10
AT4TE10925	DNA/Harbinger	HARBINGER	60.5957	3.90395	4.35532e-10
AT5TE43330	DNA/En-Spm	ATENSPM7	38.4836	4.09916	4.46873e-10
AT2TE22495	LTR/Gypsy	ATLANTYS1	42.6659	4.01032	4.52374e-10
AT4TE14235	LTR/Gypsy	ATHILA5	33.7032	4.06683	4.71131e-10
AT1TE27905	DNA/Harbinger	ATIS112A	73.9121	3.76865	5.0267e-10
AT1TE53915	LTR/Gypsy	ATGP1	98.1131	3.61716	5.0267e-10
AT3TE53615	LTR/Gypsy	ATHILA4C	39.6015	3.98408	5.17992e-10
AT3TE37690	LINE/L1	TA11	968.762	4.20409	5.37071e-10
AT3TE62770	LINE/L1	ATLINE1_4	51.0323	4.11469	5.40806e-10
AT2TE08320	RC/Helitron	HELITRON4	43.6194	4.01188	5.45379e-10
AT5TE43445	LTR/Gypsy	ATHILA6A	38.7234	3.97758	5.94041e-10
AT3TE63205	DNA/MuDR	VANDAL8	58.5745	3.82376	7.33925e-10
AT2TE18965	LINE/L1	ATLINE1_4	45.3659	3.88412	8.25106e-10
AT5TE66565	LTR/Copia	ATCOPIA31	149.282	3.05441	8.48335e-10
AT3TE62245	LTR/Gypsy	ATGP1	54.0886	3.5722	8.54768e-10
AT2TE19120	LTR/Gypsy	ATHILA0_I	40.5399	3.93143	1.07951e-09
AT2TE20110	LTR/Gypsy	ATHILA8A	35.1035	3.95042	1.14215e-09
AT3TE60295	DNA/En-Spm	ATENSPM2	52.7032	3.82704	1.19773e-09
AT5TE56030	LTR/Gypsy	ATGP1	128.744	3.41075	1.21589e-09
AT2TE19490	LTR/Gypsy	ATHILA2	31.0413	4.06626	1.2265e-09
AT2TE19555	LTR/Copia	ATCOPIA34	26.3982	4.1566	1.29937e-09
AT1TE51810	DNA/En-Spm	ATENSPM7	32.5072	4.00642	1.37362e-09
AT2TE20230	LINE/L1	TA11	42.4578	3.86375	1.39539e-09
AT3TE62765	LINE/L1	TA11	58.5099	4.07104	1.49832e-09
AT4TE25865	LINE/L1	ATLINE1_6	172.547	4.14538	1.52887e-09
AT1TE54530	LINE?	TSCL	66.3699	3.74592	1.58435e-09
AT3TE46670	LTR/Gypsy	ATGP1	86.038	3.38311	1.64364e-09
AT4TE16480	LTR/Gypsy	ATHILA4D_LTR	38.6764	3.88693	1.65702e-09
AT3TE54825	LINE/L1	TA11	29.9478	3.99419	1.9845e-09
AT3TE44955	DNA/MuDR	VANDAL8	37.7584	3.85104	2.09065e-09
AT2TE10735	RC/Helitron	HELITRONY1A	199.204	2.604	2.1285e-09
AT2TE10740	RC/Helitron	HELITRONY1A	199.204	2.604	2.1285e-09
AT3TE59040	DNA/MuDR	ARNOLDY2	35.4605	3.93147	2.14646e-09
AT3TE40130	DNA/MuDR	VANDAL5A	126.062	2.87589	2.34768e-09
AT1TE47240	LTR/Copia	ATCOPIA69	30.0337	3.99825	2.41501e-09
AT1TE47460	LTR/Copia	ATCOPIA69	30.0337	3.99825	2.41501e-09
AT2TE19425	LTR/Gypsy	ATHILA6A	39.0724	3.84949	2.7994e-09
AT3TE51295	LTR/Gypsy	ATHILA6A	39.3826	3.83573	3.09178e-09
AT4TE18590	LTR/Gypsy	ATHILA5	39.7767	3.85173	3.19939e-09
AT5TE40110	LTR/Gypsy	ATGP10	40.2696	3.82337	3.38097e-09
AT4TE23200	DNA/MuDR	ATMU11	39.4696	3.83651	3.75062e-09
AT5TE45190	LTR/Gypsy	ATHILA4A	26.0265	4.0851	3.89479e-09
AT4TE23190	DNA/MuDR	ATMU3	45.7826	3.85341	3.98439e-09
AT2TE28290	DNA/HAT	ATHAT1	45.4282	3.76926	4.11187e-09
AT5TE24045	DNA/MuDR	VANDAL5A	132.53	2.73117	4.41763e-09
AT5TE34985	DNA/MuDR	ARNOLD2	40.3824	3.8336	4.48445e-09
AT5TE15645	LINE/L1	ATLINEIII	36.6611	3.87293	4.57134e-09
AT3TE50030	LTR/Gypsy	ATHILA8A	31.802	3.90875	4.7394e-09
AT2TE21295	DNA/MuDR	VANDAL3	180.09	3.34951	5.67961e-09
AT3TE51670	LTR/Gypsy	ATHILA3	539.948	4.0364	5.95401e-09
AT2TE15400	LTR/Gypsy	ATHILA4B_LTR	29.0497	3.90895	7.05724e-09
AT5TE44310	LTR/Gypsy	ATGP1	57.4337	3.61845	7.71924e-09
AT1TE57220	LTR/Gypsy	ATLANTYS1	54.8898	3.67164	8.69544e-09
AT2TE20420	LTR/Gypsy	ATHILA3	54.2828	3.53225	1.03767e-08
AT2TE23210	DNA/En-Spm	ATENSPM9	42.4635	3.78235	1.06329e-08
AT1TE51005	LTR/Gypsy	ATHILA6B	25.5864	3.95144	1.0809e-08
AT2TE19250	DNA/En-Spm	ATENSPM3	31.7149	3.8861	1.15055e-08
AT5TE25535	RC/Helitron	ATREP12	128.7	3.3574	1.39432e-08
AT5TE55925	DNA/MuDR	ATMU6	41.6325	3.69919	1.82568e-08
AT5TE41780	DNA/En-Spm	ATENSPM4	29.7038	3.81788	1.82724e-08
AT5TE40390	LTR/Gypsy	ATGP10	24.6094	3.9341	1.84078e-08
AT2TE16855	LTR/Gypsy	ATHILA5	32.2683	3.80081	2.10439e-08
AT2TE16255	LTR/Gypsy	ATHILA6A	31.0766	3.84503	2.18702e-08
AT3TE49545	LTR/Gypsy	ATHILA6B	33.8523	3.74368	2.34415e-08
AT2TE13245	DNA/MuDR	VANDAL5A	27.2327	3.86772	2.39885e-08
AT2TE23665	LTR/Gypsy	ATGP1	78.0852	3.43901	2.42711e-08
AT4TE15840	LTR/Gypsy	ATHILA3	32.4734	3.84287	2.47107e-08
AT2TE12225	DNA/MuDR	VANDAL9	40.7347	3.69273	2.48531e-08
AT4TE14220	LTR/Gypsy	ATHILA0_I	29.219	3.80095	2.66998e-08
AT1TE52995	LTR/Gypsy	ATHILA0_I	29.4436	3.78782	2.73487e-08
AT4TE08445	LTR/Gypsy	ATLANTYS2	96.1656	3.52479	2.79723e-08
AT3TE59535	RC/Helitron	HELITRON3	25.5847	3.89534	2.80614e-08
AT3TE50625	LTR/Gypsy	ATHILA	35.9438	3.80081	3.00868e-08
AT2TE23940	LTR/Gypsy	ATGP2	46.841	3.57352	3.09526e-08
AT1TE20090	DNA/MuDR	ATREP16	43.5934	3.61267	3.33956e-08
AT5TE44555	LTR/Gypsy	ATLANTYS1	36.7786	3.80222	3.49965e-08
AT3TE60185	LTR/Gypsy	ATHILA0_I	33.0776	3.72464	3.57114e-08
AT2TE21440	LTR/Gypsy	ATHILA6B	31.5933	3.80294	3.70976e-08
AT2TE58010	Unassigned	Unassigned	33.3565	3.76126	3.73892e-08
AT5TE47755	DNA/Harbinger	ATIS112A	84.9631	3.3468	3.81727e-08
AT1TE47175	LTR/Gypsy	ATHILA8B	26.0346	3.88073	4.11687e-08
AT1TE47395	LTR/Gypsy	ATHILA8B	26.0346	3.88073	4.11687e-08
AT3TE51625	LTR/Gypsy	ATHILA7	24.4481	3.88673	4.11687e-08
AT5TE48045	LTR/Gypsy	ATHILA3	30.4977	3.75476	4.30126e-08
AT3TE54845	DNA/MuDR	ARNOLD2	41.0017	3.66327	4.64539e-08
AT1TE51075	LTR/Gypsy	ATGP5	22.6661	3.89309	4.75085e-08
AT4TE15675	LTR/Gypsy	ATHILA4C	23.1371	3.86942	4.83814e-08
AT4TE19850	LTR/Gypsy	ATHILA4	25.1892	3.83517	4.93886e-08
AT5TE43880	DNA/En-Spm	ATENSPM7	23.9363	3.85449	5.20015e-08
AT1TE44235	LTR/Gypsy	ATHILA4A	23.2921	3.89276	5.5328e-08
AT4TE16475	LTR/Gypsy	ATHILA4A	38.0483	3.63816	7.72415e-08
AT2TE07145	LTR/Copia	ATCOPIA95	1106.66	3.22631	7.85474e-08
AT3TE57280	DNA/En-Spm	ATENSPM7	22.1254	3.85323	8.04203e-08
AT2TE17155	LTR/Gypsy	ATHILA0_I	31.8107	3.66787	8.17192e-08
AT5TE41815	LTR/Gypsy	ATHILA4C	25.0023	3.78924	8.26632e-08
AT3TE48090	LTR/Gypsy	ATHILA2	39.8197	3.67324	8.41047e-08
AT3TE50255	LTR/Gypsy	ATHILA4A	22.2429	3.85513	8.82383e-08
AT3TE54975	DNA/En-Spm	ATENSPM3	22.9268	3.84119	8.83719e-08
AT2TE26785	LTR/Gypsy	ATLANTYS1	38.9773	3.58151	1.03649e-07
AT3TE59880	DNA/MuDR	ATMU10	38.7084	3.62264	1.04825e-07
AT5TE43235	LTR/Gypsy	ATHILA	34.4093	3.63091	1.15509e-07
AT3TE62890	LTR/Gypsy	ATGP9B	23.4195	3.78207	1.20309e-07
AT5TE26810	DNA/MuDR	ATDNAI27T9A	48.9013	3.60034	1.21387e-07
AT2TE15675	LTR/Gypsy	ATHILA3	31.2292	3.65934	1.23053e-07
AT3TE51150	DNA/En-Spm	ATENSPM11	1758.92	3.28854	1.24677e-07
AT5TE40545	LTR/Gypsy	ATHILA	26.8339	3.70606	1.27876e-07
AT4TE15680	LTR/Gypsy	ATHILA4A	23.5124	3.80818	1.31039e-07
AT1TE47610	LTR/Gypsy	ATHILA6B	24.8425	3.77165	1.34228e-07
AT5TE43200	LTR/Gypsy	ATGP2N	47.3613	3.41174	1.35639e-07
AT5TE41550	LTR/Gypsy	ATHILA4B_LTR	39.2391	3.71784	1.37707e-07
AT3TE51900	LTR/Copia	ATCOPIA28	60.9818	3.48435	1.46998e-07
AT2TE20600	LTR/Gypsy	ATHILA4A	36.2267	3.57657	1.5631e-07
AT4TE16050	LTR/Gypsy	ATHILA5	31.5357	3.61629	1.62202e-07
AT2TE11445	DNA/MuDR	VANDAL16	23.8488	3.74757	1.6227e-07
AT1TE51080	LTR/Gypsy	ATHILA2	32.4657	3.66437	1.64313e-07
AT5TE42985	LTR/Gypsy	ATHILA6B	30.1459	3.633	1.65384e-07
AT2TE20735	LTR/Gypsy	ATLANTYS1	50.401	3.42619	1.78238e-07
AT3TE52225	LTR/Gypsy	ATHILA4C	27.0076	3.72818	1.87721e-07
AT5TE39415	DNA/Harbinger	HARBINGER	30.251	3.62377	1.87721e-07
AT3TE50060	LTR/Copia	ATCOPIA94	29.3404	3.68921	2.0333e-07
AT5TE54505	DNA/MuDR	ATMU1	41.3768	3.52827	2.2802e-07
AT5TE37960	DNA/En-Spm	ATENSPM5	31.8495	3.58611	2.4486e-07
AT5TE37355	LTR/Gypsy	ATHILA3	149.629	2.45081	2.59164e-07
AT1TE46835	LTR/Gypsy	ATHILA0_I	40.5574	3.34075	2.65989e-07
AT1TE50315	LTR/Gypsy	ATLANTYS2	55.9149	3.44471	2.75629e-07
AT1TE50775	LTR/Gypsy	ATLANTYS2	55.9149	3.44471	2.75629e-07
AT2TE21535	LTR/Gypsy	ATHILA4A	27.2583	3.63222	2.93114e-07
AT4TE17460	LTR/Copia	ROMANIAT5	37.4602	3.61977	2.9485e-07
AT1TE38210	LTR/Copia	ATCOPIA31	107.668	2.98703	3.05569e-07
AT2TE19440	LTR/Gypsy	ATHILA0_I	37.5359	3.54051	3.11522e-07
AT1TE18370	DNA/HAT	TAG2	119.989	2.53524	3.29181e-07
AT2TE21045	LTR/Gypsy	ATHILA2	28.4532	3.70252	3.38708e-07
AT3TE65100	DNA/MuDR	ARNOLD1	40.9388	3.49638	3.52985e-07
AT1TE45620	DNA/MuDR	ATDNAI27T9B	39.3915	3.50264	3.7262e-07
AT5TE46325	LTR/Gypsy	ATHILA0_I	20.8077	3.72256	4.26538e-07
AT1TE45185	LTR/Gypsy	ATGP5	26.4807	3.60655	4.35546e-07
AT1TE43600	LTR/Gypsy	ATGP3	20.822	3.72566	4.47217e-07
AT5TE42915	LTR/Gypsy	ATHILA6A	25.6178	3.62293	4.81769e-07
AT5TE40100	LTR/Gypsy	ATLANTYS2	36.9274	3.53677	4.92194e-07
AT2TE17795	LTR/Gypsy	ATHILA2	48.2536	3.56214	5.12852e-07
AT5TE46475	LINE/L1	ATLINE1_6	23.3164	3.66228	5.16468e-07
AT1TE52720	DNA/MuDR	ATDNAI27T9A	22.6399	3.67967	5.86873e-07
AT3TE51930	LTR/Gypsy	ATGP1	187.481	2.93168	6.17297e-07
AT3TE59765	DNA/En-Spm	ATENSPM10	24.5693	3.58919	6.31238e-07
AT3TE57255	LTR/Gypsy	ATHILA3	24.6995	3.58908	6.43257e-07
AT3TE53600	LTR/Gypsy	ATHILA4C	145.523	3.68263	6.57936e-07
AT4TE14460	LINE/L1	TA11	26.8176	3.55334	6.60342e-07
AT5TE40505	LTR/Gypsy	ATHILA6A	39.4578	3.5509	6.6465e-07
AT2TE09645	DNA/En-Spm	ATENSPM7	34.8953	3.52489	6.81047e-07
AT2TE25365	DNA/MuDR	ATMU1	32.0687	3.49242	6.84795e-07
AT5TE47120	DNA/MuDR	VANDAL2	36.6276	3.50292	6.94e-07
AT3TE55375	LTR/Gypsy	ATHILA2	28.3027	3.52793	7.03054e-07
AT3TE55440	LTR/Gypsy	ATHILA6A	23.1467	3.6681	7.50836e-07
AT5TE44110	DNA/HAT	ATHAT1	30.9196	3.53724	8.41301e-07
AT2TE40345	LTR/Gypsy	ATGP5	33.4911	3.43929	9.14641e-07
AT5TE54520	DNA/MuDR	ATMU3	40.4648	3.45517	9.15985e-07
AT5TE37385	LTR/Gypsy	ATHILA3	38.8136	3.42324	9.44452e-07
AT1TE46830	RC/Helitron	HELITRON4	41.8359	3.20686	9.45494e-07
AT3TE58635	DNA/En-Spm	ATENSPM10	28.1002	3.5494	1.01873e-06
AT4TE15695	LTR/Gypsy	ATLANTYS2	24.2733	3.55472	1.11874e-06
AT4TE16230	LTR/Gypsy	ATHILA3	29.8884	3.50655	1.19993e-06
AT5TE52400	LINE/L1	ATLINE1_2	37.8912	3.43865	1.21551e-06
AT3TE60610	DNA/MuDR	VANDAL2	41.3795	3.36027	1.28753e-06
AT3TE50040	LTR/Gypsy	ATHILA5	34.4311	3.53515	1.29175e-06
AT1TE44230	LTR/Gypsy	ATGP1	26.9408	3.47111	1.29366e-06
AT3TE61155	DNA/En-Spm	ATENSPM6	28.651	3.56127	1.30537e-06
AT5TE36735	RC/Helitron	ATREP6	34.7177	3.4433	1.45443e-06
AT1TE54545	LINE?	TSCL	40.7239	3.40112	1.50974e-06
AT2TE16010	LTR/Gypsy	ATHILA2	24.757	3.5387	1.51629e-06
AT2TE25520	LTR/Gypsy	ATGP3	28.1244	3.47115	1.62159e-06
AT3TE55255	LTR/Gypsy	ATHILA6A	21.1877	3.56958	1.62486e-06
AT4TE15470	LTR/Gypsy	ATHILA3	25.7537	3.48947	1.83791e-06
AT1TE48700	LTR/Gypsy	ATHILA3	20.5943	3.57618	1.84964e-06
AT5TE29680	DNA/MuDR	ATDNA1T9A	41.8009	3.29551	1.90025e-06
AT2TE17650	LTR/Gypsy	ATHILA	24.7122	3.48925	1.93056e-06
AT1TE50985	LTR/Gypsy	ATGP10	48.4318	3.32101	2.03527e-06
AT3TE53490	LINE/L1	ATLINE1_5	28.9439	3.43535	2.07442e-06
AT3TE35825	LTR/Gypsy	ATGP7	136.228	3.04774	2.25624e-06
AT3TE52550	LTR/Gypsy	ATHILA4A	31.0598	3.41574	2.38686e-06
AT2TE40350	LTR/Gypsy	ATGP6	31.8385	3.37494	2.38896e-06
AT5TE60290	LINE/L1	ATLINE1_6	22.6357	3.5198	2.66507e-06
AT4TE31745	DNA/HAT	ATHAT3	19.5249	3.54039	2.71072e-06
AT2TE20595	LTR/Gypsy	ATHILA7	30.3604	3.3887	2.78635e-06
AT3TE66890	LTR/Gypsy	ATGP2N	69.4918	2.99265	2.85885e-06
AT3TE59500	LTR/Gypsy	ATGP10	26.2255	3.4628	3.1002e-06
AT4TE18735	LTR/Gypsy	ATHILA3	23.9905	3.47516	3.1179e-06
AT4TE25105	LTR/Copia	ATCOPIA69	26.0863	3.48228	3.1591e-06
AT2TE13865	RC/Helitron	HELITRON1	26.9453	3.43284	3.30193e-06
AT3TE53590	LTR/Gypsy	ATGP3	129.287	3.53426	3.62618e-06
AT5TE45205	LTR/Gypsy	ATLANTYS1	18.2755	3.53284	4.06089e-06
AT3TE54580	LTR/Gypsy	ATHILA2	26.6472	3.40062	4.11101e-06
AT3TE62440	DNA/MuDR	ATMU11	23.6375	3.44169	4.12694e-06
AT1TE46825	DNA/MuDR	VANDAL3	72.1031	3.16933	4.9812e-06
AT1TE51650	DNA/En-Spm	ATENSPM7	34.3138	3.40501	5.00033e-06
AT5TE44850	DNA/En-Spm	ATENSPM6	23.2308	3.44812	5.24582e-06
AT2TE21555	LTR/Gypsy	ATHILA4	21.2837	3.4392	5.26188e-06
AT4TE17150	LTR/Gypsy	ATLANTYS1	31.3602	3.33906	5.29747e-06
AT5TE46845	LTR/Gypsy	ATGP10	20.7839	3.4591	5.49165e-06
AT1TE54650	LTR/Gypsy	ATHILA5	36.3275	3.30411	5.66245e-06
AT1TE45490	RC/Helitron	ATREP14	19.3724	3.49707	5.90768e-06
AT3TE59095	LTR/Gypsy	ATHILA2	28.8863	3.36581	6.23418e-06
AT2TE23855	LTR/Copia	ATCOPIA13	36.3044	3.39625	6.35219e-06
AT3TE45975	LTR/Gypsy	ATGP1	49.8396	3.15839	6.4324e-06
AT5TE38945	RC/Helitron	HELITRONY2	33.6611	3.29695	6.66047e-06
AT1TE52115	LTR/Gypsy	ATHILA2	29.7314	3.34426	6.77105e-06
AT2TE18890	LTR/Gypsy	ATHILA6B	21.2547	3.4464	6.88809e-06
AT2TE14250	LTR/Gypsy	ATGP3	37.3319	3.11203	7.41851e-06
AT3TE51610	LTR/Gypsy	ATHILA7A	20.818	3.41469	7.86851e-06
AT1TE47630	LTR/Gypsy	ATHILA8A	19.7562	3.42024	8.18789e-06
AT4TE09800	LTR/Copia	ATCOPIA59	32.0371	3.27007	8.74696e-06
AT5TE41895	LTR/Gypsy	ATHILA4	18.5316	3.44771	1.03466e-05
AT5TE47140	LTR/Gypsy	ATHILA3	21.3639	3.36828	1.05578e-05
AT4TE13495	LTR/Copia	ROMANIAT5	30.2279	3.28065	1.09717e-05
AT3TE57140	LTR/Gypsy	ATHILA2	24.3605	3.35569	1.11428e-05
AT5TE41095	LTR/Gypsy	ATHILA4	17.5363	3.41898	1.21486e-05
AT3TE41640	DNA/MuDR	ATDNAI26T9	31.3423	3.2975	1.2193e-05
AT3TE59180	LTR/Gypsy	ATHILA	28.2467	3.30789	1.29043e-05
AT3TE59035	DNA/MuDR	ARNOLDY2	23.5943	3.30899	1.42171e-05
AT2TE16605	LTR/Gypsy	ATHILA2	22.1185	3.32558	1.47413e-05
AT4TE20075	DNA/MuDR	ARNOLD3	55.5811	3.0786	1.4781e-05
AT2TE16525	LTR/Gypsy	ATHILA0_I	21.4159	3.33465	1.48755e-05
AT1TE70190	LTR/Copia	ATCOPIA26	33.0406	3.23317	1.51556e-05
AT4TE40115	DNA/En-Spm	ATENSPM6	37.6501	3.1404	1.54568e-05
AT4TE13450	LTR/Gypsy	ATGP1	39.7309	3.21631	1.54723e-05
AT3TE47560	LTR/Gypsy	ATGP2N	38.1192	3.20635	1.59809e-05
AT5TE40120	LTR/Gypsy	ATLANTYS2	27.6477	3.35896	1.64869e-05
AT5TE42435	LTR/Gypsy	ATHILA6A	28.5792	3.26042	1.68866e-05
AT3TE52365	LTR/Gypsy	ATHILA4C	20.5942	3.35632	1.70763e-05
AT3TE53605	LTR/Gypsy	ATLANTYS2	52.8723	3.14252	1.71401e-05
AT1TE51480	LTR/Gypsy	ATGP2N	25.4624	3.26631	1.81672e-05
AT1TE52855	LTR/Gypsy	ATHILA4B_LTR	51.6775	3.26917	1.84299e-05
AT2TE27870	LTR/Copia	ATCOPIA37	24.1352	3.24831	1.9467e-05
AT3TE51640	LTR/Gypsy	ATHILA8B	36.7195	3.1917	1.94994e-05
AT4TE16985	LTR/Gypsy	ATGP3	19.572	3.32043	2.15127e-05
AT3TE63535	LTR/Copia	ATCOPIA50	19.0705	3.33446	2.16045e-05
AT4TE15235	LTR/Gypsy	ATLANTYS1	22.6719	3.30167	2.25759e-05
AT4TE52315	LTR/Copia	ATCOPIA10	25.2327	3.21823	2.33162e-05
AT2TE26450	DNA/Harbinger	ATIS112A	30.8974	3.18	2.41991e-05
AT3TE72850	LTR/Copia	ATCOPIA44	74.905	2.69585	2.42735e-05
AT5TE35260	DNA/MuDR	BRODYAGA2	29.2343	3.20636	2.4689e-05
AT1TE51485	LTR/Gypsy	ATHILA4	18.3231	3.3284	2.50363e-05
AT2TE16165	DNA/En-Spm	ATENSPM10	105.19	3.35543	2.51264e-05
AT2TE21545	LTR/Gypsy	ATHILA4C	20.4054	3.30289	2.52504e-05
AT2TE16270	RC/Helitron	HELITRONY2	31.586	3.16175	2.63278e-05
AT5TE46235	LTR/Gypsy	ATHILA8B	25.4494	3.23508	2.65142e-05
AT4TE13555	LTR/Gypsy	ATLANTYS1	43.5259	3.13367	2.65943e-05
AT3TE59600	LTR/Gypsy	ATHILA2	25.8419	3.22906	2.78365e-05
AT3TE59770	DNA/MuDR	ATDNA1T9A	27.8308	3.18272	2.9516e-05
AT2TE25350	DNA/MuDR	ATMU3	29.7993	3.20178	3.09773e-05
AT2TE20040	DNA/En-Spm	ATENSPM10	31.1416	3.23731	3.14731e-05
AT2TE12810	LINE/L1	ATLINE1_6	20.4207	3.29619	3.28312e-05
AT5TE39485	LTR/Gypsy	ATGP7	42.9956	3.04195	3.3356e-05
AT1TE46635	LTR/Gypsy	ATLANTYS1	29.4047	3.15734	3.42934e-05
AT5TE49105	DNA/En-Spm	ATENSPM6	25.9293	3.2332	3.43331e-05
AT5TE37420	LTR/Gypsy	ATHILA0_I	116.901	2.28044	3.49244e-05
AT5TE74305	DNA/MuDR	AT9TSD1	27.7832	3.17956	3.60444e-05
AT5TE43820	LTR/Gypsy	ATHILA0_I	16.107	3.31593	3.6131e-05
AT3TE51800	LTR/Copia	ATCOPIA42	16.4375	3.3219	3.61708e-05
AT3TE53855	LTR/Gypsy	ATGP5	20.2086	3.28732	3.7542e-05
AT4TE17105	LTR/Copia	ATCOPIA41	31.0755	3.182	3.77081e-05
AT3TE54980	DNA/En-Spm	ATENSPM3	16.0926	3.31341	3.91728e-05
AT3TE50035	LTR/Gypsy	ATHILA7A	20.2575	3.24812	3.92308e-05
AT5TE43360	LTR/Gypsy	ATLANTYS2	45.2533	3.10746	3.92999e-05
AT1TE51265	LTR/Gypsy	ATGP10	20.5822	3.24114	4.10765e-05
AT3TE57555	LTR/Gypsy	ATGP10	23.7631	3.2027	4.20968e-05
AT2TE23510	LTR/Gypsy	ATGP1	19.2844	3.26141	4.31161e-05
AT3TE58975	DNA/En-Spm	ATENSPM10	17.1002	3.28574	4.39687e-05
AT1TE44690	LTR/Gypsy	ATHILA2	22.0575	3.23659	4.41019e-05
AT2TE20335	DNA/Harbinger	HARBINGER	26.6239	3.17363	4.49156e-05
AT3TE62020	LTR/Gypsy	ATHILA0_I	29.7478	3.15634	4.52925e-05
AT1TE58100	LTR/Gypsy	ATLANTYS3	29.3051	3.15081	4.59956e-05
AT1TE55795	LTR/Copia	ATCOPIA4	25.8541	3.15524	4.69263e-05
AT5TE50485	LINE/L1	TA11	19.0118	3.24505	4.72355e-05
AT1TE45560	LTR/Gypsy	ATGP1	80.8682	2.67375	5.12911e-05
AT5TE46340	LTR/Gypsy	ATHILA5	16.0903	3.28273	5.17815e-05
AT2TE13380	LTR/Gypsy	ATHILA6B	18.001	3.26136	5.1801e-05
AT4TE25200	LTR/Copia	ATCOPIA51	380.516	3.23407	5.2828e-05
AT1TE49755	LTR/Gypsy	ATLANTYS2	26.2116	3.16275	5.29318e-05
AT4TE18660	LTR/Gypsy	ATHILA2	27.0641	3.20695	5.34763e-05
AT3TE51895	LTR/Copia	ROMANIAT5	45.1437	3.0222	5.47567e-05
AT2TE18975	RC/Helitron	HELITRON4	15.7249	3.27286	5.76442e-05
AT2TE78210	LINE/L1	TA11	156.85	2.57615	5.80444e-05
AT1TE48905	LTR/Gypsy	ATHILA2	23.6915	3.19994	6.13574e-05
AT2TE21380	LINE/L1	ATLINE1_6	21.169	3.19449	6.24047e-05
AT5TE46370	LTR/Gypsy	ATHILA4	15.793	3.2588	6.33289e-05
AT2TE19245	DNA/En-Spm	ATENSPM7	15.8323	3.26191	6.40411e-05
AT2TE18840	RC/Helitron	HELITRON4	44.9521	2.98866	6.5742e-05
AT5TE45925	LTR/Gypsy	ATGP8	42.4263	2.81404	6.5742e-05
AT3TE58615	LTR/Gypsy	ATHILA6A	20.2642	3.19214	6.73863e-05
AT4TE14515	LTR/Gypsy	ATHILA0_I	18.717	3.20391	7.0465e-05
AT2TE12115	LTR/Copia	ATCOPIA67	30.9862	3.04737	7.18507e-05
AT4TE18760	LTR/Gypsy	ATHILA2	22.6388	3.2339	7.49959e-05
AT4TE08850	LTR/Gypsy	ATHILA2	46.7874	3.0091	7.60411e-05
AT4TE19170	LTR/Gypsy	ATHILA6B	19.8594	3.2293	7.73267e-05
AT1TE41345	LTR/Gypsy	ATLANTYS2	49.0204	3.03124	7.779e-05
AT3TE62225	LTR/Gypsy	ATHILA5	16.4349	3.22695	7.84614e-05
AT3TE52215	LTR/Gypsy	ATLANTYS2	26.3665	3.16524	7.85471e-05
AT2TE07550	LTR/Gypsy	ATGP1	291.859	1.89719	7.93331e-05
AT2TE28285	DNA/HAT	ATHAT1	28.426	3.11547	8.6473e-05
AT1TE76215	LTR/Copia	ATCOPIA51	394.889	3.16979	9.32838e-05
AT4TE24480	LTR/Copia	ATCOPIA26	31.9926	3.07083	9.78426e-05
AT2TE07425	LTR/Gypsy	ATGP5	27.3503	3.05497	9.84868e-05
AT3TE34420	DNA/HAT	SIMPLEHAT1	28.7056	3.08554	9.90664e-05
AT3TE61145	LTR/Gypsy	ATGP3	16.2223	3.19968	0.000112955
AT2TE50950	LTR/Copia	ATCOPIA50	159.708	1.99286	0.000113307
AT1TE47660	LTR/Copia	ATCOPIA69	16.0368	3.18216	0.000117437
AT3TE52020	LTR/Gypsy	ATHILA4A	20.4106	3.14093	0.000121495
AT2TE78940	RC/Helitron	ATREP4	34.6381	2.98906	0.000123794
AT4TE19340	LTR/Gypsy	ATHILA3	20.7097	3.0958	0.000124747
AT4TE18570	LTR/Gypsy	ATLANTYS1	24.9456	3.09389	0.00012924
AT5TE40530	LTR/Gypsy	ATGP10	20.6513	3.13791	0.000129478
AT5TE44370	LTR/Gypsy	ATHILA2	24.9675	3.09013	0.000130176
AT3TE45260	LINE/L1	ATLINEIII	14.9897	3.18312	0.000132683
AT2TE25515	LTR/Gypsy	ATGP3	19.3057	3.12466	0.000135949
AT4TE18580	LTR/Gypsy	ATLANTYS1	19.5715	3.11485	0.000141721
AT5TE43290	LTR/Gypsy	ATHILA2	22.3266	3.09902	0.00014226
AT5TE43320	DNA/En-Spm	ATENSPM3	19.4448	3.12848	0.000148471
AT4TE54705	LTR/Gypsy	ATGP3	23.6902	3.07785	0.000154319
AT4TE15685	DNA/En-Spm	ATENSPM7	17.0664	3.15269	0.000157772
AT3TE54780	LTR/Gypsy	ATLANTYS1	51.0473	2.90868	0.000168479
AT5TE50990	RC/Helitron	ATREP4	26.8141	3.06047	0.000171121
AT2TE19985	LTR/Gypsy	TAT1_ATH	27.3276	3.03636	0.000175872
AT4TE10345	LTR/Copia	ATCOPIA44	82.9134	2.51113	0.000193609
AT5TE61730	LTR/Copia	ATCOPIA61	19.7814	3.09496	0.000203899
AT5TE39245	DNA/MuDR	VANDAL8	37.148	2.86687	0.000212308
AT1TE54805	LTR/Gypsy	ATLANTYS1	158.743	2.12709	0.000216468
AT5TE39420	DNA/MuDR	ARNOLD3	42.3904	2.96077	0.00022039
AT5TE39210	LTR/Gypsy	ATHILA3	17.7748	3.07825	0.00023704
AT3TE52705	LINE/L1	ATLINE1_6	30.2458	2.98662	0.000254311
AT2TE09615	DNA/En-Spm	ATENSPM9	24.3871	3.00843	0.000266764
AT2TE19970	LTR/Gypsy	ATLANTYS1	33.685	2.96578	0.000281036
AT3TE57220	LTR/Gypsy	ATHILA5	14.5148	3.09664	0.000281117
AT1TE51665	DNA/En-Spm	ATENSPM3	19.0935	3.04645	0.000292052
AT3TE57720	DNA/En-Spm	ATENSPM7	23.4586	2.99198	0.000311765
AT1TE35870	DNA/HAT	ATHAT1	26.8518	2.97645	0.000315874
AT3TE50130	LTR/Gypsy	ATGP2	18.3149	3.03905	0.00032528
AT1TE44825	LINE/L1	ATLINE1_4	33.0515	2.95781	0.000334427
AT3TE59340	LTR/Gypsy	ATGP10	29.56	3.01819	0.000339725
AT4TE15990	LTR/Gypsy	ATHILA4	16.759	3.07222	0.000351266
AT2TE21760	LTR/Gypsy	ATLANTYS1	37.7108	2.87923	0.000358351
AT1TE51110	DNA/En-Spm	ATENSPM7	18.1564	3.05999	0.000362099
AT5TE50110	RC/Helitron	HELITRONY3	19.6857	3.01068	0.000367142
AT4TE19055	LTR/Gypsy	ATHILA4A	18.5633	3.06231	0.000369113
AT1TE45955	LTR/Copia	ROMANIAT5	25.915	3.05402	0.000375979
AT1TE49735	DNA/En-Spm	ATENSPM3	13.9985	3.06384	0.000379895
AT4TE19050	LTR/Gypsy	ATHILA4C	14.5538	3.05657	0.000381532
AT4TE03295	LINE/L1	ATLINE1_6	98.9653	2.44105	0.000390861
AT4TE25635	DNA/MuDR	VANDAL8	27.8937	2.9189	0.000391674
AT5TE41275	LTR/Gypsy	ATHILA2	19.8625	3.01783	0.000396588
AT1TE41490	DNA/MuDR	ATDNAI27T9A	26.7586	2.94862	0.000398645
AT3TE55160	DNA/MuDR	VANDAL2	105.777	3.06196	0.000404849
AT4TE20970	LTR/Gypsy	ATHILA6A	14.432	3.05232	0.000410236
AT3TE43910	LTR/Gypsy	ATHILA8A	37.6238	2.8241	0.000420383
AT3TE60165	LTR/Gypsy	ATGP7	18.2329	3.00198	0.000440843
AT5TE40300	DNA/En-Spm	ATENSPM5	23.2025	2.95773	0.000456592
AT5TE38710	LTR/Gypsy	ATHILA7	32.2266	2.84841	0.000465631
AT3TE52730	LTR/Gypsy	ATHILA7A	13.986	3.03535	0.000479901
AT1TE46650	LTR/Gypsy	ATHILA4A	15.462	3.03272	0.000496728
AT2TE17695	LTR/Gypsy	ATHILA	19.2783	2.96958	0.000541301
AT3TE52740	LTR/Gypsy	ATHILA8B	13.7503	3.01994	0.000550389
AT5TE47510	LTR/Gypsy	ATHILA3	18.3344	2.97203	0.000569448
AT1TE20315	DNA/HAT	TAG2	161.036	2.01565	0.000574849
AT1TE47775	LTR/Gypsy	ATHILA6B	15.3487	3.00813	0.000587505
AT2TE20440	LTR/Gypsy	ATHILA6A	45.7708	2.8415	0.000607266
AT2TE23425	DNA/MuDR	ATDNAI26T9	40.1234	2.75209	0.000615898
AT2TE45465	DNA/MuDR	VANDAL3	203.64	2.5234	0.000645402
AT3TE40425	LINE/L1	ATLINE1_3A	14.1957	2.99746	0.000656686
AT4TE16210	LTR/Gypsy	ATHILA8B	16.2344	2.97047	0.000672405
AT2TE21220	LINE/L1	ATLINE1_5	20.7528	2.93812	0.000679748
AT4TE19755	LTR/Gypsy	ATHILA8A	19.9171	2.94255	0.000682509
AT3TE54450	LTR/Gypsy	ATLANTYS3	26.2817	2.89197	0.000691725
AT5TE46820	LTR/Gypsy	ATHILA8B	15.0325	2.98705	0.000691725
AT5TE45090	LTR/Gypsy	ATLANTYS1	22.4928	2.92093	0.000698483
AT2TE15620	RC/Helitron	ATREP11	20.5435	2.93707	0.000699125
AT3TE43745	DNA/MuDR	VANDAL22	17.6509	2.95548	0.000700392
AT4TE14465	LINE/L1	ATLINE1_6	17.0999	2.95024	0.000743065
AT1TE53730	LINE/L1	ATLINE1_6	19.9745	2.92951	0.000744252
AT3TE52355	LTR/Gypsy	ATHILA3	15.9117	2.97832	0.000749369
AT4TE21070	LTR/Gypsy	ATHILA	415.377	2.58213	0.000755726
AT3TE58875	LTR/Copia	ATCOPIA80	33.8699	2.68726	0.000817712
AT2TE11760	LTR/Gypsy	ATHILA4A	13.0276	2.9713	0.000821925
AT3TE91205	LTR/Copia	ATCOPIA52	13.1743	2.9676	0.000835004
AT4TE21505	DNA/Harbinger	ATIS112A	23.9677	2.8868	0.000867697
AT2TE12335	LTR/Gypsy	ATGP10	25.2489	2.94212	0.000878886
AT4TE08440	LTR/Gypsy	ATGP2	41.2116	2.69219	0.000883278
AT5TE41545	LTR/Gypsy	ATHILA4A	17.5741	2.95663	0.000892819
AT2TE19055	LTR/Gypsy	ATHILA6A	20.536	2.90992	0.000897211
AT2TE14960	RC/Helitron	ATREP12	97.3482	2.11721	0.000897939
AT1TE51305	LTR/Gypsy	ATHILA4C	16.6767	2.94567	0.000898746
AT1TE51935	DNA/En-Spm	ATENSPM4	13.7111	2.95687	0.000899361
AT2TE20195	LINE/L1	TA11	17.9149	2.91178	0.000966082
AT1TE51960	DNA/En-Spm	ATENSPM4	19.9314	2.89361	0.000975345
AT3TE45255	LINE/L1	ATLINE2	14.768	2.95141	0.000976994
AT4TE15745	LTR/Gypsy	ATGP10	20.8304	2.90939	0.000986985
AT3TE79695	RC/Helitron	ATREP11	294.183	2.12542	0.00106216
AT1TE53735	LINE/L1	ATLINE1_4	21.5881	2.86972	0.00106969
AT2TE22245	LTR/Gypsy	ATHILA4A	17.7602	2.92259	0.00107853
AT4TE18745	LTR/Gypsy	ATHILA0_I	14.9537	2.93718	0.00108171
AT3TE59895	LTR/Gypsy	ATHILA8A	22.0466	2.87774	0.00112361
AT3TE57435	LTR/Gypsy	ATHILA4A	20.0525	2.86066	0.00117927
AT3TE51505	LTR/Gypsy	ATGP1	41.7658	2.63743	0.00120666
AT2TE09375	DNA/MuDR	VANDAL2	25.2598	2.81657	0.00132675
AT2TE15405	LTR/Gypsy	ATHILA4A	15.2578	2.89256	0.00142969
AT4TE13380	LTR/Gypsy	ATGP5	12.7776	2.89947	0.00145249
AT3TE57165	LTR/Gypsy	ATGP10	15.2548	2.88404	0.00152403
AT4TE16395	LTR/Gypsy	ATHILA6A	20.7973	2.87203	0.00153016
AT1TE49335	LTR/Gypsy	ATHILA6B	12.6498	2.88481	0.00159725
AT2TE03625	LTR/Gypsy	ATGP10	15.2741	2.88531	0.00164812
AT3TE54760	LTR/Gypsy	ATGP5	291.908	1.83892	0.00169747
AT3TE54510	DNA/MuDR	VANDAL2	31.9385	2.71101	0.001707
AT5TE46815	LTR/Gypsy	ATHILA4A	13.5315	2.87846	0.00172066
AT2TE16520	LINE/L1	ATLINEIII	13.1165	2.86693	0.00182728
AT2TE26780	LTR/Gypsy	TAT1_ATH	26.976	2.81906	0.00201706
AT5TE46355	LTR/Gypsy	ATHILA4A	14.5491	2.85214	0.00213287
AT1TE42445	LTR/Copia	ATRE1	20.9789	2.82764	0.00215898
AT2TE17405	LTR/Gypsy	ATHILA2	13.5395	2.84173	0.00224662
AT5TE50995	RC/Helitron	ATREP5	18.9553	2.80145	0.00232654
AT3TE54335	RC/Helitron	ATREP10B	11.9785	2.83358	0.00243815
AT5TE52795	RC/Helitron	HELITRON4	14.1954	2.82736	0.00247017
AT1TE51360	LTR/Copia	ROMANIAT5	19.6785	2.78925	0.00249327
AT4TE09795	LTR/Gypsy	ATHILA3	14.8944	2.81683	0.00254646
AT4TE10600	LTR/Copia	ATCOPIA57	21.2372	2.753	0.00257272
AT5TE38645	LTR/Gypsy	ATHILA4B_LTR	12.0196	2.82079	0.0026428
AT4TE17475	LTR/Gypsy	ATHILA	18.0574	2.78165	0.00267529
AT4TE17520	LTR/Gypsy	ATHILA2	14.0593	2.81663	0.00273337
AT4TE44400	DNA/HAT	ATHAT1	22.0328	2.75248	0.00274217
AT4TE08435	DNA/En-Spm	ATENSPM2	19.4414	2.76183	0.00275174
AT5TE50775	LTR/Copia	ATCOPIA10	12.6178	2.8083	0.00298696
AT5TE41105	LTR/Gypsy	ATGP2	17.0251	2.80601	0.00303116
AT3TE62775	LINE/L1	ATLINE1_5	91.1864	2.80567	0.00311008
AT5TE74190	DNA/MuDR	AT9TSD1	20.7642	2.7408	0.00313938
AT5TE47895	RC/Helitron	HELITRONY2	39.3285	2.67631	0.00326397
AT5TE45540	DNA/En-Spm	ATENSPM5	26.4306	2.71641	0.00328425
AT2TE16710	LTR/Gypsy	ATHILA	16.3709	2.75156	0.00337354
AT3TE59625	LTR/Gypsy	ATHILA4	17.693	2.74141	0.00340919
AT1TE51985	RC/Helitron	HELITRON4	17.3908	2.76779	0.0035095
AT2TE20480	DNA/En-Spm	ATENSPM3	14.4601	2.76844	0.00368177
AT4TE13500	LTR/Copia	ROMANIAT5	21.6864	2.73006	0.00368591
AT5TE50495	LINE/L1	ATLINE1_6	13.5414	2.77039	0.00376913
AT2TE10385	RC/Helitron	HELITRONY2	26.8813	2.72198	0.00394702
AT2TE21415	LTR/Gypsy	ATHILA2	14.2906	2.75664	0.00407635
AT1TE78470	Unassigned	Unassigned	63.0639	2.36606	0.00409013
AT2TE12660	LTR/Copia	ATCOPIA13	37.4633	2.64706	0.00425157
AT1TE42465	LTR/Copia	ATCOPIA48	15.9502	2.7373	0.00433871
[truncated: 48 more rows]

## Sheet: met1 vs. Col-0
Supplemental Table S1. Transcriptionally de-repressed transposons in ddm1 and met1.
Table of significantly upregulated TEs from total RNA-seq in both ddm1 or met1 mutant plants compared to wild type (Col-0).
TE.ID	TE.Superfamily	TE.Family	baseMean	log2FoldChange	Adjusted.P-value
AT1TE42890	DNA/En-Spm	ATENSPM5	12839.1	10.1585	0
AT1TE44450	DNA/En-Spm	ATENSPM4	17773.4	10.8967	0
AT1TE45020	DNA/En-Spm	ATENSPM5	17147.8	11.1537	0
AT1TE49260	LTR/Gypsy	ATHILA6B	41801.9	11.7881	0
AT1TE49850	LTR/Gypsy	ATHILA2	20601.8	11.1081	0
AT1TE51735	LTR/Gypsy	ATHILA2	19405.5	10.8674	0
AT1TE52105	LTR/Gypsy	ATHILA2	20528.5	11.0645	0
AT1TE52205	DNA/En-Spm	ATENSPM1	18593.4	11.18	0
AT1TE62470	DNA/En-Spm	ATENSPM5	14517.8	10.6929	0
AT1TE65060	DNA/En-Spm	ATENSPM4	19638	11.2334	0
AT2TE15880	LTR/Gypsy	ATHILA6A	10971.5	10.2099	0
AT2TE20220	DNA/En-Spm	ATENSPM5	16080.2	10.871	0
AT2TE22040	DNA/En-Spm	ATENSPM1	34618	11.8646	0
AT2TE63800	DNA/En-Spm	ATENSPM1	35557.3	11.8836	0
AT3TE48120	DNA/En-Spm	ATENSPM6	12744.9	10.5417	0
AT3TE51460	DNA/En-Spm	ATENSPM2	11950.9	10.4742	0
AT3TE53995	DNA/En-Spm	ATENSPM2	15941.8	11.0401	0
AT3TE60280	DNA/En-Spm	ATENSPM4	22342.8	11.179	0
AT3TE63540	LTR/Gypsy	ATHILA2	24637.4	11.1379	0
AT4TE05190	DNA/En-Spm	ATENSPM1	33655.4	11.7732	0
AT4TE09085	DNA/En-Spm	ATENSPM5	14152.7	10.5645	0
AT4TE16565	LTR/Gypsy	ATHILA2	19600.9	11.0408	0
AT4TE17470	LTR/Gypsy	ATHILA6A	21404.7	11.3663	0
AT5TE36830	LTR/Gypsy	ATGP2N	4282.21	7.08095	0
AT5TE41070	LTR/Gypsy	ATHILA6A	61418.9	11.8355	0
AT5TE42135	LTR/Gypsy	ATHILA6A	59110.7	11.8749	0
AT5TE42190	LTR/Gypsy	ATHILA6B	41851.9	11.6035	0
AT5TE42420	LTR/Gypsy	ATHILA2	32790.8	11.1628	0
AT5TE42440	LTR/Gypsy	ATHILA6A	54671.2	11.8321	0
AT5TE42470	LTR/Gypsy	ATHILA6A	61625.8	12.1404	0
AT5TE42710	LTR/Gypsy	ATHILA6A	52336.4	11.7905	0
AT5TE42855	LTR/Gypsy	ATHILA6B	22832.6	11.0497	0
AT5TE43260	LTR/Gypsy	ATHILA6A	18242.1	11.0276	0
AT5TE47115	LTR/Gypsy	ATHILA6B	16375.3	10.7402	0
AT5TE47200	LTR/Gypsy	ATHILA2	18974.9	10.7031	0
AT4TE10350	DNA/En-Spm	ATENSPM1	14501.9	11.0098	9.02383e-304
AT2TE20255	DNA/En-Spm	ATENSPM5	13669.1	10.851	7.22908e-303
AT2TE22520	LTR/Gypsy	ATHILA2	15145.8	10.7282	9.1235e-302
AT3TE50025	DNA/En-Spm	ATENSPM5	11569.6	10.8002	7.76768e-298
AT3TE69350	DNA/En-Spm	ATENSPM9	10844.2	10.1153	4.62244e-297
AT1TE60180	DNA/En-Spm	ATENSPM9	11394.5	10.2414	4.85486e-297
AT5TE65540	DNA/En-Spm	ATENSPM5	14057.9	10.9753	7.11064e-296
AT4TE15030	LTR/Gypsy	ATHILA6A	12934.2	10.5487	1.2459e-293
AT2TE24525	DNA/En-Spm	ATENSPM1A	6803.55	9.26125	2.42981e-293
AT3TE55395	LTR/Gypsy	ATHILA6A	12965.7	10.502	5.98427e-289
AT1TE38940	DNA/En-Spm	ATENSPM1A	11556.6	10.6762	1.31381e-288
AT4TE20400	LTR/Gypsy	ATHILA2	13017.1	10.464	7.16641e-287
AT3TE50655	LTR/Gypsy	ATHILA2	11983.1	10.354	8.82112e-285
AT3TE53985	DNA/En-Spm	ATENSPM2	10429.2	10.6201	3.20917e-275
AT2TE23705	DNA/En-Spm	ATENSPM4	10915.2	10.7011	1.94065e-273
AT4TE67560	DNA/MuDR	VANDAL6	4200.55	7.92096	1.7314e-272
AT5TE51685	DNA/En-Spm	ATENSPM1A	10021.5	10.5447	3.01004e-269
AT4TE14540	LTR/Gypsy	ATHILA2	12168	10.4507	6.30568e-268
AT4TE21055	LTR/Gypsy	ATHILA0_I	10385.4	5.25957	1.33122e-267
AT1TE52125	LTR/Gypsy	ATHILA2	10412	10.2707	6.24229e-263
AT5TE43665	LTR/Gypsy	ATHILA6A	10411.1	10.5328	9.32398e-263
AT3TE50760	LTR/Gypsy	ATHILA2	9110.63	9.90311	1.21309e-259
AT5TE43980	LTR/Gypsy	ATHILA6A	10349.8	10.3054	1.44674e-256
AT5TE46215	LTR/Gypsy	ATHILA6A	7806.04	9.74591	1.95894e-255
AT2TE17600	DNA/En-Spm	ATENSPM6	9049.64	10.3495	3.64795e-255
AT1TE41230	DNA/En-Spm	ATENSPM1A	9379.62	10.6477	2.18785e-249
AT1TE55320	DNA/En-Spm	ATENSPM6	7004.62	9.92703	6.79178e-249
AT1TE52590	DNA/En-Spm	ATENSPM2	8992.64	9.24111	5.73162e-247
AT3TE50595	LTR/Gypsy	ATHILA2	9569.63	10.2232	5.70964e-244
AT5TE44770	LTR/Gypsy	ATHILA2	9408.2	9.93218	1.17119e-243
AT4TE14295	LTR/Gypsy	ATHILA2	11058.4	9.91874	2.61072e-243
AT1TE50860	LTR/Gypsy	ATHILA6A	8899.93	10.2372	6.75518e-243
AT1TE52110	LTR/Gypsy	ATHILA2	9422.58	10.3224	2.77385e-242
AT1TE49300	LTR/Gypsy	ATHILA2	8362.05	9.81511	2.50342e-236
AT3TE51325	LTR/Gypsy	ATHILA2	8656.34	10.1962	1.84498e-235
AT3TE51380	DNA/En-Spm	ATENSPM6	7582.09	9.91593	2.12482e-234
AT5TE42965	LTR/Gypsy	ATHILA2	6842.5	9.74582	1.61073e-232
AT4TE16400	LTR/Gypsy	ATHILA2	8084.68	10.0724	2.22711e-232
AT4TE15945	LTR/Gypsy	ATHILA2	9283.93	10.2766	7.61516e-232
AT5TE39830	DNA/En-Spm	ATENSPM5	6705.94	9.99097	4.21698e-230
AT5TE42355	LTR/Gypsy	ATHILA2	7967.24	10.0558	4.27944e-230
AT3TE60525	LTR/Gypsy	ATHILA2	8027.02	10.1776	5.51134e-230
AT4TE19915	LTR/Gypsy	ATHILA2	8527.55	10.0178	5.68818e-230
AT1TE54480	LTR/Gypsy	ATHILA5	7923.76	9.79436	4.98068e-229
AT1TE48035	DNA/En-Spm	ATENSPM5	6583.01	10.0388	1.66787e-226
AT4TE16570	LTR/Gypsy	ATHILA6B	6547.33	9.72979	3.83915e-224
AT3TE60460	LTR/Gypsy	ATHILA6A	7771.44	10.0891	2.7879e-223
AT2TE12030	DNA/En-Spm	ATENSPM6	6060.25	9.87163	4.83209e-223
AT2TE11920	DNA/En-Spm	ATENSPM6	6132.84	9.89779	5.21416e-223
AT2TE24385	LTR/Gypsy	ATHILA6A	5400.22	9.56454	1.01329e-222
AT4TE25050	DNA/MuDR	VANDAL6	3749.15	8.30123	5.7387e-221
AT3TE60550	DNA/En-Spm	ATENSPM6	5872.22	9.79832	1.86078e-217
AT2TE06955	DNA/MuDR	VANDAL21	2397.19	6.24563	4.28558e-217
AT5TE46210	LTR/Gypsy	ATHILA8B	7331.91	9.76439	1.90411e-216
AT5TE39425	DNA/En-Spm	ATENSPM11	5348.35	8.77837	2.56817e-213
AT1TE51065	LTR/Gypsy	ATHILA2	5933.6	9.44076	1.05489e-211
AT3TE55340	LTR/Gypsy	ATHILA2	7119.36	9.74395	7.36703e-211
AT3TE50675	DNA/En-Spm	ATENSPM5	7823.02	9.67073	2.95435e-210
AT2TE11350	LTR/Gypsy	ATHILA2	6781.65	9.33913	2.75399e-209
AT3TE57150	LTR/Gypsy	ATHILA6A	7153.65	9.46539	3.67079e-209
AT3TE50650	DNA/En-Spm	ATENSPM5	5464.15	9.87948	3.8391e-209
AT1TE49955	DNA/En-Spm	ATENSPM5	4262.54	8.89016	1.95892e-208
AT2TE21710	DNA/En-Spm	ATENSPM2	6591.1	9.5784	9.97445e-208
AT4TE15255	LTR/Gypsy	ATHILA2	6632.9	9.50006	1.36833e-205
AT3TE62025	LTR/Gypsy	ATHILA2	5896.48	9.47105	2.58188e-205
AT2TE17095	RC/Helitron	HELITRONY2	5170.69	9.81062	1.24385e-204
AT2TE17110	DNA/En-Spm	ATENSPM6	5152.58	9.80629	2.18565e-204
AT5TE41865	LTR/Gypsy	ATHILA6A	5341.58	9.52786	2.07912e-203
AT3TE58020	LTR/Gypsy	ATHILA2	6460	9.60377	2.25395e-203
AT4TE15875	DNA/En-Spm	ATENSPM9	4912.15	9.81974	6.84467e-203
AT1TE46765	LTR/Gypsy	ATHILA2	6938.17	9.72389	2.73677e-202
AT5TE43815	LTR/Gypsy	ATHILA2	5825.83	9.46084	3.29639e-202
AT4TE18060	LTR/Gypsy	ATHILA6A	5733.95	9.54237	4.79673e-200
AT1TE42225	DNA/En-Spm	ATENSPM5	6789.06	9.54063	9.42393e-200
AT5TE43385	DNA/En-Spm	ATENSPM9	4325.55	9.38333	2.98232e-199
AT1TE27295	DNA/MuDR	VANDAL6	3205.89	7.88934	3.2688e-199
AT1TE45135	LTR/Gypsy	ATHILA2	5632.89	9.39678	4.79672e-197
AT2TE43165	DNA/MuDR	VANDAL6	2883.08	7.88905	9.81587e-196
AT1TE59745	LTR/Copia	ATCOPIA49	3963.84	9.12297	2.73606e-195
AT3TE53215	LTR/Gypsy	ATHILA2	6984.67	9.38838	4.05551e-195
AT3TE54005	DNA/En-Spm	ATENSPM1A	4460.61	9.54011	1.62135e-194
AT5TE40425	DNA/En-Spm	ATENSPM1	5070.6	9.62017	9.86331e-193
AT4TE19135	DNA/En-Spm	ATENSPM3	4422.96	9.31555	5.09319e-190
AT4TE17205	DNA/En-Spm	ATENSPM9	4246.46	9.5313	2.00287e-188
AT3TE64435	LTR/Copia	ATCOPIA11	5895.69	9.67067	2.0806e-188
AT1TE46575	LTR/Gypsy	ATHILA2	4976.25	9.38922	7.23251e-188
AT5TE44355	LTR/Gypsy	ATHILA2	5276.39	9.58198	4.87006e-187
AT1TE44125	DNA/MuDR	VANDAL6	2826.71	8.09672	8.68191e-187
AT3TE61525	DNA/En-Spm	ATENSPM4	6364.79	9.62139	5.95282e-186
AT5TE36940	DNA/En-Spm	ATENSPM5	4160.69	9.49811	2.26232e-184
AT3TE57395	DNA/En-Spm	ATENSPM6	3861.76	9.31363	7.44244e-183
AT2TE22505	LTR/Gypsy	ATHILA2	4281.91	9.3783	6.3483e-182
AT4TE14035	LTR/Gypsy	ATHILA6A	4811.05	9.34154	6.97384e-182
AT2TE20940	LTR/Gypsy	ATHILA3	3512.54	7.78171	5.49604e-181
AT4TE19150	LTR/Gypsy	ATHILA2	3861.28	9.16331	1.15949e-180
AT1TE52950	DNA/En-Spm	ATENSPM6	3965.27	9.41568	2.7668e-180
AT5TE55555	LTR/Gypsy	ATHILA7	1972.66	7.18215	4.28431e-180
AT4TE15440	LTR/Gypsy	ATHILA3	7695.46	8.98496	2.51089e-178
AT2TE16825	LTR/Gypsy	ATHILA	8934.94	8.78027	3.46265e-177
AT4TE16080	LTR/Gypsy	ATHILA3	6844.2	9.2166	1.15434e-176
AT4TE20800	DNA/En-Spm	ATENSPM6	3344.67	9.21737	3.19728e-176
AT5TE40575	LTR/Gypsy	ATHILA2	4013.93	9.34771	3.38411e-176
AT4TE16390	LTR/Gypsy	ATLANTYS2	2465.66	9.35065	6.97831e-176
AT4TE18435	DNA/En-Spm	ATENSPM6	4305.11	9.36624	1.60229e-175
AT3TE52305	LTR/Gypsy	ATHILA3	5615.03	8.91295	4.47651e-175
AT2TE42810	DNA/MuDR	VANDAL21	3482.74	8.85633	4.78578e-174
AT3TE55025	LTR/Gypsy	ATHILA2	4399.41	9.21378	2.47371e-173
AT4TE17360	LTR/Gypsy	ATHILA	13507.1	7.83032	5.29212e-173
AT3TE51735	DNA/En-Spm	ATENSPM3	3952.61	9.33736	6.25194e-173
AT4TE08465	LTR/Gypsy	ATHILA3	7353.74	9.13763	1.48085e-172
AT5TE64600	DNA/MuDR	VANDAL6	2352.44	7.82279	1.71889e-172
AT4TE08475	LTR/Gypsy	ATHILA2	7337.72	9.13557	1.84009e-172
AT2TE22335	DNA/En-Spm	ATENSPM1A	3687.13	9.34231	1.20417e-170
AT4TE16380	LTR/Gypsy	ATHILA2	1864.46	7.5954	4.17084e-170
AT2TE16230	LTR/Gypsy	ATHILA2	3476.29	9.20673	5.24667e-170
AT5TE83215	LTR/Copia	ATCOPIA49	2685.15	8.48595	5.32883e-169
AT4TE17240	LTR/Gypsy	ATHILA2	3947.03	9.14227	8.1488e-169
AT1TE44455	DNA/En-Spm	ATENSPM2	3300.59	9.23388	6.57986e-168
AT3TE62685	LTR/Gypsy	ATHILA0_I	9385.26	8.32564	1.20711e-167
AT1TE45200	LTR/Gypsy	ATHILA2	3939.68	8.99752	1.40565e-167
AT4TE16945	LTR/Gypsy	ATHILA	11364.1	7.42601	3.53509e-167
AT1TE45790	LTR/Gypsy	ATHILA6A	3657.79	9.25056	4.30317e-167
AT1TE44630	DNA/En-Spm	ATENSPM2	7790.66	8.58458	6.12825e-167
AT2TE16865	LTR/Gypsy	ATHILA2	3884.3	8.93486	3.8796e-166
AT4TE23410	LTR/Gypsy	ATGP2N	1605.25	7.26111	1.32932e-165
AT5TE23185	LTR/Copia	ATCOPIA89	1871.32	7.13394	1.88828e-165
AT1TE48730	LTR/Gypsy	ATHILA3	8063.8	8.35784	2.15582e-164
AT5TE37965	DNA/En-Spm	ATENSPM6	3008.73	8.90067	6.91683e-164
AT4TE13035	DNA/En-Spm	ATENSPM9	2888.75	9.10035	3.12134e-163
AT1TE46755	LTR/Gypsy	ATHILA2	4415.69	9.07202	1.1628e-162
AT2TE16575	LTR/Gypsy	ATHILA2	4213.61	8.92288	4.93061e-161
AT5TE43190	LTR/Gypsy	ATHILA2	2744.98	8.5702	1.191e-160
AT3TE67445	DNA/MuDR	VANDAL7	3408.07	8.40777	2.5237e-160
AT4TE20745	LTR/Gypsy	ATHILA2	4119.82	8.70635	6.91807e-160
AT3TE70635	DNA/MuDR	VANDAL6	2298.58	7.64863	7.00428e-159
AT1TE39515	DNA/En-Spm	ATENSPM10	3275.58	8.5915	8.63545e-159
AT4TE19925	LTR/Gypsy	ATHILA5	3132.76	8.93325	1.45778e-158
AT4TE18245	LTR/Gypsy	ATHILA	5389.39	8.61495	1.3727e-157
AT1TE48775	LTR/Gypsy	ATHILA3	7701.37	8.1973	2.52329e-156
AT1TE46265	LTR/Gypsy	ATHILA6B	3189.44	8.88986	1.86217e-155
AT4TE15670	LTR/Gypsy	ATHILA0_I	5396.17	6.80104	2.67317e-155
AT2TE18450	DNA/En-Spm	ATENSPM1A	2573.57	8.81288	7.95482e-155
AT3TE59620	LTR/Gypsy	ATHILA2	3837.61	8.87873	6.63954e-154
AT5TE41795	DNA/En-Spm	ATENSPM9	2692.61	8.88339	2.01969e-153
AT5TE43255	LTR/Gypsy	ATHILA2	3647.76	8.7175	8.60514e-151
AT3TE63935	Unassigned	SADHU	1380.64	5.77418	1.68321e-150
AT4TE16085	DNA/En-Spm	ATENSPM11	3052.2	8.75104	7.07869e-150
AT5TE42900	LTR/Gypsy	ATHILA2	2821.28	8.58979	1.56337e-148
AT3TE53580	DNA/MuDR	VANDAL21	2508.07	8.70951	1.74124e-148
AT5TE41870	DNA/En-Spm	ATENSPM9	2640.74	8.75568	2.78612e-148
AT2TE20260	LTR/Gypsy	ATHILA2	3066.06	8.85745	3.31122e-148
AT1TE70815	LINE?	TSCL	2546.74	8.72534	5.20183e-148
AT1TE54760	DNA/En-Spm	ATENSPM1A	3573.43	8.30856	5.15348e-147
AT4TE16900	LTR/Gypsy	ATHILA	11545.7	8.01629	2.28265e-146
AT3TE60560	DNA/En-Spm	ATENSPM6	2627.67	8.78695	3.56758e-146
AT5TE53465	DNA/MuDR	VANDAL6	1756.13	7.42825	7.33366e-146
AT4TE17510	LTR/Gypsy	ATHILA2	3677.17	8.7212	3.32466e-145
AT1TE45175	LTR/Gypsy	ATHILA6A	3294.65	8.82794	7.38094e-145
AT5TE39315	DNA/En-Spm	ATENSPM2	3888.44	8.57227	7.91236e-144
AT4TE20125	DNA/En-Spm	ATENSPM6	1993.77	8.47628	1.59841e-142
AT2TE16310	DNA/En-Spm	ATENSPM7	3128.17	8.46343	8.03855e-142
AT3TE60285	DNA/En-Spm	ATENSPM2	2509.52	8.77576	3.0463e-141
AT1TE50875	LTR/Gypsy	ATHILA2	2402.41	8.62339	5.94005e-141
AT3TE55365	LTR/Gypsy	ATHILA6A	3435.61	8.57844	1.53935e-140
AT5TE43975	LTR/Gypsy	ATHILA6A	2474.59	8.70727	2.71044e-140
AT1TE46665	LTR/Gypsy	ATHILA3	5552.01	8.02948	5.4645e-139
AT5TE47500	LTR/Gypsy	ATHILA2	2655.24	8.406	8.88428e-139
AT2TE13350	LTR/Gypsy	ATHILA	2342.96	8.58481	2.1143e-138
AT1TE47105	LTR/Gypsy	ATHILA2	2549.43	8.32912	7.21263e-138
AT4TE18705	LTR/Gypsy	ATHILA6A	2207.21	8.57153	1.61056e-137
AT3TE55355	LTR/Gypsy	ATHILA2	2538.46	8.19154	5.666e-137
AT2TE23970	SINE	ATSINE2A	2830.11	8.582	6.37946e-137
AT3TE47975	DNA/En-Spm	ATENSPM11	2980.93	8.24546	6.44119e-137
AT3TE50670	LTR/Gypsy	ATHILA2	2116.19	8.53456	1.72591e-136
AT3TE48070	DNA/MuDR	VANDAL21	2170.61	8.40663	3.79175e-136
AT4TE29830	LTR/Copia	ATCOPIA22	1604.27	5.7463	9.85513e-136
AT4TE17115	LTR/Gypsy	ATHILA6A	1951.24	8.30524	1.85951e-135
AT5TE36945	DNA/En-Spm	ATENSPM6	1935.02	8.53576	1.06671e-133
AT3TE51660	LTR/Gypsy	ATHILA2	1753.43	8.51074	4.89447e-133
AT1TE51000	LTR/Gypsy	ATHILA2	2463.6	8.52565	6.84732e-133
AT1TE28830	Unassigned	Unassigned	1794.45	7.58245	8.783e-133
AT2TE18885	LTR/Gypsy	ATHILA2	2311.12	8.5189	9.69533e-132
AT4TE18670	LTR/Gypsy	ATHILA6A	2068.77	8.51091	3.59288e-130
AT3TE54690	DNA/En-Spm	ATENSPM5	2231.23	8.30312	4.38984e-130
AT1TE53390	LTR/Gypsy	ATGP6	1855.79	8.54331	2.07991e-129
AT4TE13485	LTR/Gypsy	ATHILA2	2289.32	8.44912	8.9656e-129
AT5TE43915	LTR/Gypsy	ATHILA8B	2944.05	8.35656	3.13581e-128
AT1TE47750	LTR/Gypsy	ATHILA2	2487.71	8.31626	1.40212e-127
AT4TE08995	LTR/Gypsy	ATHILA2	2362.04	8.15584	1.74127e-127
AT3TE59100	LTR/Gypsy	ATHILA2	2358.61	8.43592	8.96736e-127
AT5TE63610	LTR/Copia	ENDOVIR1	1452.33	7.61076	9.86764e-127
AT2TE11145	LTR/Gypsy	ATHILA2	2327.61	8.21391	3.66611e-126
AT5TE43940	DNA/En-Spm	ATENSPM6	1725.83	8.44677	9.53777e-126
AT3TE50020	DNA/En-Spm	ATENSPM5	1313.84	8.53042	2.47926e-124
AT5TE34980	Unassigned	Unassigned	1069.45	6.10637	2.62374e-124
AT5TE42660	LTR/Gypsy	ATHILA2	3934.27	7.99044	1.67864e-123
AT4TE15870	DNA/En-Spm	ATENSPM6	1535.54	8.29014	1.64711e-122
AT2TE19435	LTR/Gypsy	ATHILA5	1671.18	8.31305	1.00048e-120
AT3TE54705	LTR/Gypsy	ATHILA6A	2174.08	8.10927	5.50158e-120
AT3TE58895	LTR/Gypsy	ATHILA0_I	3472	8.11149	1.33899e-119
AT5TE43615	LTR/Gypsy	ATHILA3	2220.13	8.17988	1.53202e-119
AT3TE53970	LTR/Gypsy	ATHILA	3662.97	7.59089	2.43885e-119
AT3TE62215	LTR/Gypsy	ATHILA5	2242.36	7.94666	2.51486e-119
AT2TE09640	DNA/En-Spm	ATENSPM7	1803.04	7.92847	9.28058e-118
AT2TE16860	LTR/Gypsy	ATHILA2	1672.6	8.09667	2.21374e-117
AT5TE44730	LTR/Gypsy	ATHILA3	2210.39	8.11412	8.25747e-117
AT1TE35305	DNA/MuDR	VANDAL8	1477.04	8.24347	3.17068e-116
AT2TE11925	DNA/En-Spm	ATENSPM5	1462.42	8.14114	4.39395e-116
AT5TE46220	DNA/Harbinger	ATIS112A	1449.02	7.61767	5.3241e-116
AT2TE07745	DNA/En-Spm	ATENSPM9	3086.36	8.06794	6.90327e-116
AT1TE36570	DNA/En-Spm	ATENSPM3	2040.64	6.18587	1.12934e-115
AT1TE51155	LTR/Gypsy	ATHILA2	1749.11	8.03195	1.33828e-115
AT1TE42875	SINE	ATSINE2A	937.651	8.4723	6.43479e-115
AT1TE45710	LTR/Gypsy	ATHILA2	1637.27	7.83335	7.7864e-115
AT4TE18445	LTR/Gypsy	ATHILA	2027.61	8.08668	8.65513e-115
AT2TE12555	LTR/Gypsy	ATHILA3	3172.38	7.58344	1.65602e-114
AT1TE50560	LTR/Gypsy	ATGP5	1661.68	8.15439	3.55646e-114
AT1TE50115	LTR/Gypsy	ATGP5	1660.47	8.15175	5.62689e-114
AT3TE50600	LTR/Gypsy	ATHILA6A	1494.43	7.91822	1.8957e-113
AT3TE48135	DNA/En-Spm	ATENSPM11	1919.1	7.90935	3.64799e-113
AT2TE17725	LTR/Gypsy	ATHILA0_I	1913.73	7.66973	3.11092e-112
AT4TE20120	DNA/En-Spm	ATENSPM5	1354.78	8.16638	3.53148e-112
AT1TE53635	DNA/MuDR	VANDAL8	1105.74	7.04506	1.76692e-111
AT5TE43805	LTR/Gypsy	ATHILA8B	1824.84	7.89126	2.00781e-111
AT4TE44080	LTR/Copia	ATCOPIA1	1009.51	7.31772	7.32184e-111
AT1TE43040	LTR/Gypsy	ATGP7	1551.76	7.63412	9.23257e-111
AT4TE21170	LTR/Gypsy	ATHILA3	2058.89	7.73148	1.56469e-110
AT4TE20245	LTR/Gypsy	ATHILA8B	1225.7	7.87458	1.06358e-109
AT5TE40565	DNA/En-Spm	ATENSPM6	1381.82	8.02089	7.05513e-109
AT3TE57445	LTR/Gypsy	ATHILA6A	1611.92	7.97151	1.56685e-108
AT1TE44380	LTR/Copia	ATCOPIA89	1770.42	7.8172	1.6152e-108
AT3TE55360	LTR/Gypsy	ATHILA6B	1525.01	7.98092	2.85001e-108
AT3TE60310	Unassigned	SADHU	797.128	5.40251	3.24652e-108
AT3TE22200	DNA/MuDR	VANDAL17	1066.03	4.60812	3.53237e-108
AT5TE42330	LTR/Gypsy	ATHILA5	1304.71	7.91559	8.1513e-108
AT4TE10675	DNA/En-Spm	ATENSPM11	1528.17	7.65426	1.67753e-107
AT2TE11985	LTR/Gypsy	ATHILA8A	2042.94	7.43321	2.16854e-107
AT2TE20205	DNA/En-Spm	ATENSPM3	30561.3	7.35683	2.47881e-107
AT2TE16235	LTR/Gypsy	ATLANTYS3	1328.39	8.08595	3.49616e-107
AT5TE49755	DNA/MuDR	VANDAL21	1160.39	7.92296	3.58015e-107
AT3TE60425	LTR/Gypsy	ATHILA3	2011.83	8.04756	3.72693e-107
AT4TE10210	DNA/MuDR	VANDAL7	2266.75	7.76045	1.3454e-106
AT3TE59155	LTR/Gypsy	ATHILA2	1659.48	7.84828	1.35726e-106
AT2TE28325	LTR/Copia	ATCOPIA38B	1353.59	7.41626	3.38604e-106
AT1TE52985	LTR/Gypsy	ATHILA0_I	2985.63	7.50994	4.80323e-106
AT5TE55490	Unassigned	Unassigned	1080.53	8.27669	8.43989e-106
AT3TE53990	DNA/En-Spm	ATENSPM2	1180.94	8.01038	1.89852e-105
AT5TE41420	DNA/En-Spm	ATENSPM10	1599.91	7.21797	7.47527e-105
AT2TE11805	DNA/En-Spm	ATENSPM1A	2054.05	7.51017	7.87576e-105
AT1TE48835	LTR/Gypsy	ATHILA6B	1327.08	7.76935	2.69738e-104
AT2TE13440	LTR/Gypsy	ATHILA5	2377.98	7.72458	1.01074e-103
AT2TE24735	DNA/MuDR	VANDAL7	1402.37	7.43335	5.71135e-103
AT4TE23345	DNA/MuDR	VANDAL21	1103.69	7.90709	2.09386e-102
AT5TE47160	LTR/Gypsy	ATHILA3	3308.25	7.5115	4.11977e-102
AT2TE12020	LTR/Gypsy	ATHILA	1847.6	7.27809	4.17662e-101
AT2TE19200	DNA/En-Spm	ATENSPM7	1972.8	7.76901	5.80418e-101
AT5TE20395	LTR/Copia	ATCOPIA93	5933.93	5.20827	1.50197e-100
AT5TE38340	DNA/En-Spm	ATENSPM3	1701.92	7.28646	3.68986e-100
AT1TE51055	LTR/Gypsy	ATHILA6A	1254.2	7.78483	1.32129e-98
AT4TE25590	LTR/Copia	ATCOPIA49	1355.39	7.33177	1.9208e-98
AT5TE40515	LTR/Gypsy	ATHILA2	1255.52	7.74805	3.23219e-98
AT3TE52320	LTR/Gypsy	ATHILA5	1513.26	7.65177	3.40454e-98
AT3TE54735	LTR/Gypsy	ATHILA2	1011.62	6.59535	8.40652e-98
AT1TE52200	DNA/MuDR	VANDAL4	19803.9	7.84995	9.07525e-98
AT5TE43625	LTR/Gypsy	ATHILA5	1241.43	7.57926	3.11608e-97
AT2TE27645	LINE/L1	TA11	1176.29	7.70657	3.40555e-97
AT5TE44235	DNA/MuDR	VANDAL6	1046.36	7.13385	5.46162e-97
AT1TE48830	DNA/En-Spm	ATENSPM11	3064.06	7.21133	6.42768e-97
AT2TE08135	DNA/MuDR	VANDAL6	908.363	7.07998	1.6415e-96
AT2TE11960	DNA/HAT	ATHAT3	1076.84	7.7238	2.09947e-96
AT3TE60430	LTR/Gypsy	ATGP10	1540.35	7.57334	2.08219e-95
AT5TE43240	LTR/Gypsy	ATHILA2	1070.77	7.45275	2.98129e-95
AT1TE41580	LTR/Copia	ATCOPIA93	4086.85	5.02283	3.59259e-95
AT1TE48660	LTR/Gypsy	ATHILA6B	1120.55	7.62223	2.26769e-94
AT2TE19005	LTR/Gypsy	ATHILA0_I	2279.08	7.20204	2.53873e-94
AT4TE18315	LTR/Gypsy	ATHILA3	1868.05	7.18675	6.66264e-94
AT2TE05755	DNA/MuDR	VANDAL21	904.303	7.41048	3.024e-93
AT1TE51820	DNA/En-Spm	ATENSPM3	1851.24	7.35755	3.27016e-93
AT3TE50940	LTR/Gypsy	ATHILA3	2007.67	7.33915	7.22847e-93
AT4TE07420	DNA/En-Spm	ATENSPM4	1524.72	7.67083	9.74526e-93
AT4TE15825	LTR/Gypsy	ATGP10	2409.98	7.78901	1.68277e-92
AT4TE18470	DNA/MuDR	VANDAL8	828.911	6.41952	2.1815e-92
AT2TE35840	LTR/Copia	ATCOPIA69	1994.35	6.62864	2.3122e-91
AT1TE48020	LTR/Gypsy	ATHILA6A	1453.21	7.38069	3.59166e-91
AT4TE13315	LTR/Gypsy	ATHILA2	1241.3	7.54383	2.83871e-90
AT2TE11560	LTR/Gypsy	ATHILA6A	997.441	7.34644	5.706e-90
AT4TE09845	DNA/Harbinger	ATIS112A	836.898	5.48596	6.20083e-90
AT4TE19780	LTR/Gypsy	ATHILA2	1165.5	7.38142	8.58797e-90
AT2TE19075	DNA/En-Spm	ATENSPM6	870.966	7.52	1.86569e-89
AT2TE19595	DNA/En-Spm	ATENSPM2	933.775	7.56645	2.04026e-89
AT3TE59105	LTR/Gypsy	ATHILA6A	1071.85	7.53364	2.78985e-89
AT4TE15420	LTR/Gypsy	ATHILA2	1052.39	7.20262	7.25192e-89
AT3TE51650	LTR/Gypsy	ATHILA2	660.042	7.57137	6.59409e-88
AT4TE15665	LTR/Gypsy	ATHILA4C	5405.18	6.27217	7.91233e-88
AT1TE49675	DNA/En-Spm	ATENSPM6	1308.25	7.36995	9.57916e-88
AT1TE53660	DNA/MuDR	VANDAL8	798.217	6.95545	1.15971e-87
AT2TE11890	DNA/En-Spm	ATENSPM1A	1639.56	7.2245	2.14433e-86
AT4TE25065	DNA/MuDR	VANDAL7	1228.81	7.1546	2.85371e-86
AT2TE06620	DNA/En-Spm	ATENSPM6	1405.96	7.43423	2.93707e-86
AT1TE44905	LTR/Gypsy	ATHILA2	912.924	7.33135	3.79669e-86
AT1TE74860	DNA/Harbinger	HARBINGER	844.254	6.58238	5.61802e-86
AT1TE47280	LTR/Gypsy	ATHILA0_I	7453.7	7.14118	1.1191e-85
AT5TE69650	Unassigned	Unassigned	743.218	7.16853	2.26031e-85
AT2TE48990	DNA/Harbinger	HARBINGER	821.852	7.38721	1.29049e-84
AT3TE57345	LTR/Gypsy	ATHILA6A	1110.54	7.30229	3.01184e-84
AT3TE51250	DNA/En-Spm	ATENSPM9	820.932	7.25661	3.10474e-84
AT2TE20330	LTR/Gypsy	ATHILA5	1303.24	7.15947	4.81591e-84
AT5TE41975	LTR/Copia	ATCOPIA66	3125.55	7.09909	5.26267e-84
AT4TE18675	LTR/Gypsy	ATHILA6A	825.94	7.37161	5.40101e-84
AT5TE41980	DNA/En-Spm	ATENSPM10	3121.71	7.09817	6.08443e-84
AT1TE82600	DNA/MuDR	ATMU2	716.131	7.1304	8.41418e-84
AT3TE57785	LTR/Gypsy	ATHILA6A	795.592	7.39691	1.31823e-83
AT2TE17590	LTR/Gypsy	ATHILA8B	1077.99	7.36876	1.38852e-83
AT4TE18720	LTR/Gypsy	ATHILA3	749.854	6.82039	1.53657e-83
AT2TE13360	LTR/Gypsy	ATHILA6A	774.251	7.38638	1.97959e-83
AT4TE32185	SINE	ATSINE2A	655.378	5.4768	8.03836e-83
AT3TE49090	DNA/MuDR	ATMU5	726.896	6.91696	1.43241e-82
AT4TE18330	LTR/Gypsy	ATHILA3	3270	6.85283	4.69353e-82
AT4TE13505	LTR/Gypsy	ATHILA2	1092.44	7.26388	4.82439e-82
AT5TE39140	DNA/Harbinger	ATIS112A	728.939	4.93043	5.60307e-82
AT5TE34730	DNA/MuDR	VANDAL8	712.021	6.94672	1.49111e-81
AT2TE19610	LTR/Gypsy	ATGP10	1090.75	7.35907	1.63788e-81
AT5TE38285	LINE/L1	TA11	900.689	7.04646	2.2424e-81
AT4TE16745	LINE/L1	ATLINE1_6	871.56	7.3561	3.54823e-81
AT5TE43215	LTR/Copia	ATCOPIA27	721.174	7.55778	3.88555e-81
AT1TE64830	DNA/MuDR	ATMU2	679.839	7.12823	4.9176e-81
AT3TE57935	DNA/MuDR	VANDAL7	1681.97	4.60543	5.3134e-81
AT4TE09995	DNA/HAT	ATHAT3	737.785	7.28509	1.6501e-80
AT5TE41425	LTR/Gypsy	ATHILA2	956.647	7.06727	5.58736e-80
AT3TE57050	LTR/Gypsy	ATHILA	2971.49	6.80888	2.06663e-79
AT1TE51645	LTR/Gypsy	ATHILA2	716.336	7.03913	4.53669e-79
AT1TE47540	LTR/Gypsy	ATHILA4C	1057.24	6.78192	1.51705e-78
AT2TE20445	LTR/Gypsy	ATGP2N	556.117	6.54946	1.52159e-78
AT1TE47500	LTR/Gypsy	ATHILA0_I	7452.56	7.24059	3.92421e-78
AT3TE61290	LTR/Gypsy	ATLANTYS2	553.702	7.13492	4.7188e-78
AT1TE54925	DNA/MuDR	ATMU10	908.669	7.11878	1.02078e-77
AT4TE21190	LTR/Gypsy	ATHILA5	948.276	7.1129	3.19111e-77
AT2TE25740	DNA/Harbinger	ATIS112A	587.684	6.8929	4.94576e-77
AT5TE48820	LINE/L1	ATLINE1_6	795.403	7.15103	5.07424e-77
AT2TE16580	LTR/Gypsy	ATHILA2	715.67	7.18539	3.14011e-76
AT3TE57995	LTR/Gypsy	ATHILA2	745.367	7.11913	6.50997e-76
AT2TE00030	LTR/Gypsy	ATLANTYS3	507.985	5.64245	1.90067e-75
AT2TE26230	LTR/Copia	ATCOPIA9	1147.46	6.86323	1.90565e-75
AT5TE44740	LTR/Gypsy	ATHILA5	822.222	6.95187	2.7852e-75
AT3TE57920	LTR/Gypsy	ATHILA2	746.448	7.10796	2.99411e-75
AT3TE50165	LTR/Gypsy	ATHILA2	788.845	7.09334	3.52423e-75
AT5TE39320	DNA/En-Spm	ATENSPM2	1133.03	7.08376	4.2424e-75
AT3TE51330	LTR/Gypsy	ATGP5	849.252	7.21657	4.53036e-75
AT1TE47550	LTR/Gypsy	ATHILA2	877.194	6.7383	4.66262e-75
AT2TE17730	LTR/Gypsy	ATHILA6A	909.697	7.26846	7.5493e-75
AT3TE53045	DNA/En-Spm	ATENSPM10	2027.42	7.13531	1.32388e-74
AT2TE18455	LTR/Gypsy	ATHILA0_I	743.43	7.04957	2.57453e-74
AT3TE62395	Unassigned	Unassigned	754.436	6.89096	3.64726e-74
AT4TE09565	DNA/En-Spm	ATENSPM2	1071.34	6.859	1.20679e-73
AT4TE18440	LTR/Gypsy	ATHILA	571.972	7.11735	1.86795e-73
AT5TE44735	LTR/Gypsy	ATHILA3	786.693	7.00312	3.2113e-73
AT3TE52310	LTR/Gypsy	ATHILA5	893.459	6.94479	3.29958e-73
AT4TE15270	LTR/Gypsy	ATHILA2	686.033	6.92817	6.09968e-73
AT5TE39325	DNA/En-Spm	ATENSPM2	791.155	6.9391	1.00052e-72
AT1TE48735	LTR/Gypsy	ATHILA3	1593.38	6.7423	1.44373e-72
AT5TE61735	LTR/Copia	ATCOPIA15	1354.98	6.52747	2.26739e-72
AT2TE09735	DNA/HAT	ATHAT2	614.036	6.9237	4.56788e-72
AT1TE52990	LTR/Gypsy	ATHILA5	1231.68	6.82431	5.12337e-72
AT3TE55410	LTR/Gypsy	ATHILA2	651.03	6.80405	5.89708e-72
AT5TE42680	LTR/Gypsy	ATHILA6A	788.567	6.97201	8.39431e-72
AT2TE16420	DNA/En-Spm	ATENSPM9	576.07	7.03866	9.9335e-72
AT2TE26680	DNA/En-Spm	ATENSPM10	903.274	6.70149	1.14237e-71
AT5TE42015	LTR/Gypsy	ATHILA3	1026.98	6.84239	2.34385e-71
AT1TE51990	LTR/Gypsy	ATHILA6A	694.631	6.98337	1.03154e-70
AT1TE49845	LTR/Gypsy	ATHILA6B	694.809	6.97881	1.0949e-70
AT3TE60200	LTR/Gypsy	ATHILA3	1020.35	6.45633	1.44917e-70
AT3TE82555	LTR/Gypsy	ATGP3	582.739	6.65809	2.2501e-70
AT1TE14085	DNA/MuDR	ATMU4	703.179	6.99137	2.65168e-70
AT5TE00230	LTR/Copia	ATCOPIA27	554.222	7.20495	2.87919e-70
AT2TE17565	LTR/Gypsy	ATHILA8B	919.446	6.90976	5.03369e-70
AT1TE51045	LTR/Gypsy	ATHILA6B	619.096	6.84994	1.67781e-69
AT4TE16990	DNA/MuDR	VANDAL21	604.522	6.95285	3.49095e-69
AT3TE57310	DNA/En-Spm	ATENSPM11	1326	5.84807	3.62923e-69
AT4TE16385	LTR/Gypsy	ATLANTYS2	397.315	6.97785	5.15783e-69
AT2TE21105	LTR/Gypsy	ATHILA0_I	1025.31	6.57286	8.88054e-69
AT1TE71950	LTR/Copia	ATRE1	434.657	6.29124	9.96135e-69
AT1TE42210	DNA/En-Spm	ATENSPM3	4943.14	4.1227	1.58025e-68
AT3TE20780	DNA/MuDR	VANDAL21	452.918	5.68362	1.79399e-68
AT1TE72060	LTR/Copia	ATRE1	434.246	6.41402	2.0537e-68
AT5TE40195	LTR/Gypsy	ATHILA2	764.535	6.88814	1.05488e-67
AT3TE59610	LTR/Gypsy	ATHILA6A	673.445	6.83029	1.68649e-67
AT3TE54695	LTR/Gypsy	ATHILA2	741.562	6.67738	2.04483e-67
AT4TE20535	DNA/En-Spm	ATENSPM7	1015.13	6.66742	2.40648e-67
AT2TE28020	DNA/MuDR	ATMU1	475.154	6.8386	3.47409e-67
AT2TE10980	LTR/Gypsy	ATHILA	1332.52	6.46169	4.3979e-67
AT1TE72615	DNA/HAT	ATHAT1	431.611	6.754	5.88257e-67
AT2TE37050	LTR/Copia	ATCOPIA72	736.874	6.33623	7.82246e-67
AT3TE60510	LTR/Gypsy	ATHILA2	598.227	6.71842	1.07154e-66
AT3TE51340	LTR/Gypsy	ATGP5	540.268	6.84521	3.77207e-66
AT2TE17625	LTR/Gypsy	ATHILA6A	1229.02	6.53431	3.94417e-66
AT2TE26315	DNA/HAT	ATHAT7	539.205	6.85989	1.02279e-65
AT1TE96425	DNA/MuDR	ATMU3	503.819	6.36563	1.94979e-65
AT5TE50960	LTR/Gypsy	ATHILA8A	532.582	6.70453	3.28491e-65
AT1TE50800	DNA/En-Spm	ATENSPM9	612.383	6.85616	4.07953e-65
AT4TE09055	LTR/Gypsy	ATHILA3	854.256	6.71899	4.45966e-65
AT4TE21670	DNA/MuDR	VANDAL5A	533.114	5.01438	4.73152e-65
AT1TE50345	DNA/En-Spm	ATENSPM9	608.636	6.84103	6.83237e-65
AT4TE18630	LTR/Gypsy	ATHILA0_I	717.2	6.68736	6.89498e-65
AT1TE33490	LINE/L1	TA11	1032.79	6.07106	2.91711e-64
AT5TE33455	DNA/MuDR	ATMU1	476.343	6.71872	3.32977e-64
AT4TE19920	LTR/Gypsy	ATHILA2	654.361	6.68041	3.54923e-64
AT5TE41415	DNA/En-Spm	ATENSPM10	656.435	6.52518	4.44445e-64
AT1TE19130	DNA/MuDR	ATMU3	492.943	6.82915	5.76185e-64
AT2TE22075	DNA/En-Spm	ATENSPM9	448.927	6.21188	1.21114e-63
AT1TE47570	LTR/Gypsy	ATHILA2	565.908	6.5942	2.75935e-63
AT1TE46625	DNA/MuDR	VANDAL8	444.766	6.59188	2.80509e-63
AT1TE45855	LINE/L1	ATLINE2	569.952	6.60017	3.25429e-63
AT3TE79695	RC/Helitron	ATREP11	294.183	5.54245	3.61048e-63
AT1TE29570	DNA/Harbinger	HARBINGER	559.897	4.53375	9.66974e-63
AT3TE57355	LTR/Gypsy	ATHILA2	705.333	6.629	1.20063e-62
AT3TE60410	DNA/MuDR	VANDAL20	888.1	6.34675	1.59877e-62
AT3TE54000	DNA/En-Spm	ATENSPM4	445.256	6.77603	1.86991e-62
AT2TE21505	LTR/Gypsy	ATHILA2	1133.87	6.08234	1.8739e-62
AT3TE50605	LTR/Gypsy	ATHILA2	516.716	6.61279	2.92295e-62
AT2TE16585	LTR/Gypsy	ATHILA3	501.384	6.71843	2.99453e-62
AT5TE39850	LTR/Gypsy	ATGP10	457.519	6.86735	3.00768e-62
AT5TE43325	DNA/En-Spm	ATENSPM7	1290.01	6.55402	3.0324e-62
AT3TE54700	LTR/Gypsy	ATHILA2	652.475	6.49987	6.22759e-62
AT2TE18415	DNA/En-Spm	ATENSPM3	4550.81	6.583	7.58955e-62
AT4TE15280	LTR/Gypsy	ATHILA2	525.386	6.65171	1.10697e-61
AT4TE16575	LTR/Gypsy	ATGP7	565.803	6.4722	1.30277e-61
AT3TE57645	DNA/MuDR	VANDAL8	551.761	6.65181	1.43094e-61
AT4TE18740	LTR/Gypsy	ATHILA2	540.931	6.45589	1.64605e-61
AT3TE48150	DNA/En-Spm	ATENSPM11	626.517	6.34714	2.08882e-61
AT3TE59660	LTR/Gypsy	ATHILA4C	522.534	6.65351	2.93532e-61
AT1TE46690	LTR/Gypsy	ATHILA7	2049.84	6.10752	4.18405e-61
AT4TE14130	LTR/Gypsy	ATHILA3	704.78	6.61299	4.78486e-61
AT3TE51565	LTR/Gypsy	ATGP2N	418.242	5.63547	6.98955e-61
AT4TE18715	LTR/Gypsy	ATHILA2	516.398	6.63902	8.35139e-61
AT3TE63035	LTR/Gypsy	ATLANTYS2	428.06	6.70021	8.84072e-61
AT1TE62360	Unassigned	SADHU	416.829	6.60954	1.29416e-60
AT4TE18680	LTR/Gypsy	ATHILA6A	452.616	6.65253	1.70566e-60
AT5TE44070	LTR/Gypsy	ATHILA2	519.853	6.50003	2.86684e-60
AT4TE16500	DNA/HAT	ATHAT7	442.608	6.64871	3.17321e-60
AT5TE22990	DNA/En-Spm	ATENSPM2	521.853	6.58858	4.27606e-60
AT1TE39380	DNA/MuDR	ATMU10	427.899	6.69624	4.39127e-60
AT1TE46330	DNA/Harbinger	ATIS112A	668.991	6.50255	4.39129e-60
AT3TE57780	DNA/MuDR	VANDAL7	2135.36	3.54699	5.1651e-60
AT4TE13990	LTR/Gypsy	ATHILA6A	544.363	6.55464	9.27892e-60
AT1TE47365	LTR/Gypsy	ATHILA3	2928.66	6.14457	1.30776e-59
AT5TE41270	LTR/Gypsy	ATHILA2	679.174	6.48792	1.40998e-59
AT5TE35265	DNA/MuDR	ATMU5	382.978	6.66269	2.96207e-59
AT1TE47145	LTR/Gypsy	ATHILA3	2929.02	6.13543	3.00137e-59
AT2TE18410	LTR/Gypsy	ATHILA3	1072.87	5.15984	3.84613e-59
AT3TE55370	LTR/Gypsy	ATHILA2	605.159	6.41066	4.52138e-59
AT4TE16910	LTR/Gypsy	ATHILA6A	2678.5	5.80961	4.72945e-59
AT5TE42265	LTR/Gypsy	ATHILA	1353.83	6.15349	6.0165e-59
AT4TE18615	LTR/Gypsy	ATHILA5	588.961	6.53399	6.3091e-59
AT3TE47235	LTR/Copia	ATCOPIA27	376.567	6.78035	6.42808e-59
AT4TE18755	LTR/Gypsy	ATHILA2	644.584	6.0992	1.03027e-58
AT2TE16245	LTR/Gypsy	ATHILA6A	432.687	6.6345	1.07203e-58
AT1TE52210	DNA/En-Spm	ATENSPM1	428.089	6.70129	2.7225e-58
AT3TE61535	LTR/Gypsy	ATHILA0_I	650.941	6.45367	3.09192e-58
AT1TE46235	DNA/En-Spm	ATENSPM9	639.863	6.33981	3.65367e-58
AT5TE42345	LTR/Gypsy	ATHILA2	380.047	6.42461	4.75329e-58
AT1TE66380	LTR/Copia	ATCOPIA48	3786.05	6.28341	5.65313e-58
AT4TE09175	Unassigned	Unassigned	416.839	6.48262	6.30698e-58
AT1TE46735	LTR/Gypsy	ATHILA	1979.53	6.07894	1.59245e-57
AT5TE40295	DNA/En-Spm	ATENSPM5	447.904	6.58035	3.51865e-57
AT3TE61065	LTR/Gypsy	ATHILA5	355.862	6.60166	3.6075e-57
AT2TE20925	LTR/Gypsy	ATHILA5	495.869	6.20367	3.95021e-57
AT3TE63405	DNA/En-Spm	ATENSPM2	448.798	4.89883	1.98678e-56
AT1TE53060	LTR/Gypsy	ATHILA4	704.482	6.35715	2.31704e-56
AT3TE44950	DNA/MuDR	VANDAL6	414.367	6.32106	2.58418e-56
AT2TE22510	LTR/Gypsy	ATHILA2	451.142	6.49939	3.68393e-56
AT4TE22955	DNA/En-Spm	ATENSPM9	385.093	6.54689	5.01459e-56
AT1TE48025	LTR/Gypsy	ATHILA6A	558.783	6.40957	5.31981e-56
AT2TE17985	LTR/Copia	ATCOPIA41	579.711	6.34423	8.36629e-56
AT1TE47780	LTR/Gypsy	ATHILA2	552.504	6.53453	1.09009e-55
AT2TE15655	DNA/MuDR	VANDAL17	395.969	6.48562	1.62118e-55
AT4TE23195	DNA/MuDR	ATMU5	511.934	6.47419	2.43927e-55
AT5TE38650	LTR/Gypsy	ATHILA6A	464.566	6.23122	4.61917e-55
AT5TE33315	LTR/Gypsy	ATHILA7A	443.862	6.14709	5.09299e-55
AT3TE55480	LTR/Gypsy	ATHILA6B	394.99	6.46279	5.81201e-55
AT5TE18475	DNA/MuDR	VANDAL12	344.412	6.39134	6.48635e-55
AT5TE36825	LTR/Gypsy	ATLANTYS2	389.016	5.54626	6.76311e-55
AT5TE79225	LTR/Copia	ATCOPIA22	720.099	6.04084	6.82678e-55
AT5TE43315	LTR/Gypsy	ATHILA	651.085	6.49533	7.48967e-55
AT5TE47100	LTR/Copia	ATCOPIA15	829.043	6.17714	9.97408e-55
AT1TE45475	LTR/Gypsy	ATHILA6A	460.481	6.40287	1.05766e-54
AT4TE09460	LTR/Copia	ATCOPIA44	495.159	6.33992	1.23438e-54
AT2TE15490	LTR/Gypsy	ATHILA	760.191	6.17194	1.74535e-54
AT4TE14135	LTR/Gypsy	ATHILA5	467.242	6.35297	3.1449e-54
AT1TE70490	LTR/Copia	ATCOPIA22	783.938	6.18498	4.21358e-54
AT1TE52000	LTR/Gypsy	ATHILA2	413.613	6.40749	4.76184e-54
AT4TE11335	DNA/MuDR	VANDAL12	340.449	6.36207	4.83721e-54
AT3TE53745	DNA/MuDR	VANDAL21	378.761	5.94204	5.32765e-54
AT1TE53415	LTR/Gypsy	ATHILA5	403.158	6.35766	3.42393e-53
AT2TE19600	DNA/En-Spm	ATENSPM1A	406.224	6.45225	4.08218e-53
AT1TE49305	LTR/Gypsy	ATHILA2	439.747	6.37256	6.00926e-53
AT5TE43990	LTR/Gypsy	ATHILA2	408.135	6.34537	9.46234e-53
AT2TE23185	DNA/En-Spm	ATENSPM9	461.843	6.39536	1.14933e-52
AT1TE48765	LTR/Gypsy	ATHILA	1529.26	5.62628	3.18699e-52
AT4TE09455	DNA/En-Spm	ATENSPM11	434.591	6.37407	3.20956e-52
AT3TE59450	LTR/Gypsy	ATHILA8B	914.5	6.16732	6.87484e-52
AT1TE64825	DNA/MuDR	ATMU1	339.813	6.19472	6.99464e-52
AT4TE14990	LTR/Gypsy	ATHILA2	423.79	6.31945	8.21026e-52
AT1TE96100	DNA/MuDR	ATMU11	500.599	6.21137	8.78678e-52
AT1TE47745	LTR/Gypsy	ATHILA6A	433.671	6.26353	9.62593e-52
AT4TE44390	DNA/HAT	SIMPLEHAT1	315.301	5.83226	1.0409e-51
AT2TE19240	DNA/En-Spm	ATENSPM7	1123.54	6.09681	1.05056e-51
AT3TE60555	DNA/En-Spm	ATENSPM9	337.551	6.3477	1.08642e-51
AT1TE45385	DNA/En-Spm	ATENSPM7	1022.64	6.47941	1.45744e-51
AT5TE42335	LTR/Gypsy	ATHILA2	382.171	6.20287	2.51716e-51
AT2TE38905	LTR/Gypsy	ATGP2N	785.941	5.21018	2.95392e-51
AT1TE46770	LTR/Gypsy	ATHILA2	487.329	6.33023	3.82418e-51
AT3TE57110	LTR/Gypsy	ATHILA2	443.749	6.22866	3.89108e-51
AT4TE10985	LTR/Gypsy	ATGP2N	313.433	5.5904	4.32024e-51
AT2TE22235	LTR/Gypsy	ATHILA7A	466.967	6.18356	6.31887e-51
AT2TE23240	DNA/Harbinger	ATIS112A	268.993	6.31958	6.93032e-51
AT3TE60195	LTR/Gypsy	ATHILA	473.959	6.19405	1.15519e-50
AT2TE16530	LTR/Gypsy	ATHILA4C	337.702	6.31963	1.56927e-50
AT3TE61520	DNA/En-Spm	ATENSPM2	431.164	6.23034	2.28119e-50
AT2TE00115	LTR/Gypsy	ATGP1	445.794	4.62784	2.39977e-50
AT3TE47740	SINE	ATSINE2A	385.63	5.3955	4.33726e-50
AT3TE61600	DNA/MuDR	VANDAL20	350.185	6.24456	7.04991e-50
AT2TE38900	LTR/Copia	ATCOPIA76	1357.02	5.82638	1.34274e-49
AT5TE54525	DNA/MuDR	VANDAL12	311.375	6.27398	1.42418e-49
AT1TE58075	LTR/Copia	ATCOPIA38A	373.351	6.1777	1.56253e-49
AT5TE32355	LTR/Copia	ATCOPIA27	308.166	6.53324	1.67402e-49
AT3TE61555	LTR/Gypsy	ATHILA6A	498.424	6.13352	1.8256e-49
AT1TE72970	LTR/Copia	ATCOPIA5	277.626	6.23439	2.07183e-49
AT4TE18650	LTR/Gypsy	ATHILA4B_LTR	419.084	6.23598	2.1115e-49
AT5TE43580	DNA/Harbinger	ATIS112A	469.519	5.32685	3.79446e-49
AT2TE13340	LTR/Copia	ATCOPIA95	380.048	6.28133	7.87639e-49
AT4TE15260	LTR/Gypsy	ATHILA2	430.456	6.1426	8.95221e-49
AT2TE08785	LTR/Copia	ATCOPIA66	969.41	4.13786	1.04236e-48
AT5TE44365	LTR/Gypsy	ATHILA2	389.723	6.22713	1.21659e-48
AT3TE56700	LTR/Gypsy	ATHILA	3068.99	5.74314	7.21604e-48
AT3TE51335	LTR/Gypsy	ATGP6	368.54	6.19347	1.17844e-47
AT5TE46840	LTR/Gypsy	ATGP10	1442.63	5.77609	1.44182e-47
AT2TE20140	DNA/MuDR	VANDAL21	295.135	5.81576	1.47959e-47
AT1TE52120	LTR/Gypsy	ATHILA2	305.114	6.11345	2.0413e-47
AT2TE16425	DNA/En-Spm	ATENSPM5	291.955	6.18988	2.17932e-47
AT1TE47605	LTR/Gypsy	ATHILA3	2287.56	5.71909	3.15466e-47
AT1TE54645	DNA/En-Spm	ATENSPM9	283.739	6.03695	3.43282e-47
AT2TE08275	DNA/MuDR	VANDAL5A	423.236	4.91454	3.96168e-47
AT2TE17655	LTR/Gypsy	ATHILA	1292.15	5.63748	4.97358e-47
AT2TE17660	LTR/Gypsy	ATHILA	1292.15	5.63748	4.97358e-47
AT4TE08990	LTR/Gypsy	ATHILA6A	403.824	6.09238	5.30821e-47
AT3TE62390	Unassigned	Unassigned	348.706	6.17154	7.34176e-47
AT2TE11385	DNA/En-Spm	ATENSPM9	352.979	6.17203	1.3149e-46
AT5TE45065	LTR/Gypsy	ATHILA6A	455.482	6.07484	2.66033e-46
AT1TE04710	DNA/MuDR	ATDNAI27T9B	264.089	5.98939	2.68701e-46
AT1TE52135	LTR/Gypsy	ATHILA2	284.813	6.14473	3.47701e-46
AT2TE11545	DNA/En-Spm	ATENSPM6	313.85	6.13651	4.13838e-46
AT3TE02240	Unassigned	SADHU	365.456	3.97468	4.3539e-46
AT4TE14995	LTR/Gypsy	ATHILA2	354.736	6.09865	5.69162e-46
AT1TE47545	LTR/Gypsy	ATHILA2	337.588	6.0769	6.3066e-46
AT5TE44415	DNA/Harbinger	HARBINGER	587.44	5.71061	7.27392e-46
AT2TE13060	LTR/Copia	ATCOPIA32	315.812	6.01356	9.41051e-46
AT2TE26910	DNA/MuDR	ARNOLD2	355.983	6.08357	1.47999e-45
AT2TE45465	DNA/MuDR	VANDAL3	203.64	6.15999	1.51724e-45
AT2TE20590	LTR/Gypsy	ATHILA8B	352.88	5.96356	2.60088e-45
AT5TE42010	DNA/En-Spm	ATENSPM6	501.108	5.92675	3.76064e-45
AT1TE46795	DNA/En-Spm	ATENSPM5	253.802	6.12977	4.16643e-45
AT3TE76225	LTR/Copia	ATCOPIA52	3572.48	3.36964	4.33709e-45
AT2TE26855	DNA/MuDR	ARNOLD2	314.628	6.03729	5.00872e-45
AT3TE58630	LTR/Gypsy	ATHILA3	518.229	5.8865	8.77755e-45
AT1TE45390	LTR/Gypsy	ATGP10	867.281	6.09948	1.45529e-44
AT2TE19625	LTR/Gypsy	ATHILA4C	442.145	6.21048	2.31363e-44
AT4TE21180	LTR/Gypsy	ATHILA5	375.466	5.9652	2.58891e-44
AT2TE11515	DNA/MuDR	ARNOLD3	305.285	5.885	3.81365e-44
AT2TE19430	LTR/Gypsy	ATHILA0_I	275.706	5.94677	3.969e-44
AT1TE48745	LTR/Gypsy	ATHILA	1223.93	5.55776	4.6217e-44
AT3TE50570	DNA/MuDR	VANDAL3	488.308	5.77086	5.7183e-44
AT1TE43880	DNA/MuDR	ATMU11	437.24	5.86804	7.95627e-44
AT3TE58900	DNA	ATDNA12T3A	606.999	5.86915	1.21631e-43
AT3TE62785	LINE/L1	ATLINE1_6	1112.34	6.76783	1.26925e-43
AT2TE00045	LTR/Gypsy	ATGP2N	250.464	5.20859	1.93615e-43
AT2TE17875	LTR/Gypsy	ATGP2	253.374	5.65792	2.6021e-43
AT2TE19475	DNA/En-Spm	ATENSPM2	448.026	5.94712	3.50419e-43
AT2TE19590	LTR/Gypsy	ATHILA4C	238.722	6.06388	3.50419e-43
AT2TE19535	LTR/Gypsy	ATHILA	1089.67	5.55269	4.04273e-43
AT1TE67645	LTR/Gypsy	ATGP2N	333.89	4.43339	6.17009e-43
AT3TE45430	LTR/Gypsy	ATGP10	298.538	4.56155	6.37869e-43
AT2TE19615	DNA/MuDR	VANDAL21	322.733	5.47755	6.3994e-43
AT2TE21110	LTR/Gypsy	ATHILA8B	486.969	5.7141	6.58374e-43
AT2TE28555	DNA/Harbinger	ATIS112A	393.773	4.84257	6.87488e-43
AT4TE09480	DNA/MuDR	VANDAL20	280.037	5.96987	9.4427e-43
AT4TE15380	LTR/Gypsy	ATHILA3	285.206	5.86653	1.11055e-42
AT4TE53965	LTR/Copia	ATCOPIA22	613.731	5.64573	1.85258e-42
AT5TE43060	LTR/Gypsy	ATHILA2	341.829	6.11312	2.12473e-42
AT3TE47555	DNA/MuDR	VANDAL21	255.637	5.49152	2.25428e-42
AT2TE27460	LTR/Gypsy	ATLANTYS1	210.046	6.07257	2.26007e-42
AT5TE45060	LTR/Gypsy	ATGP10	652.782	5.39605	3.31402e-42
AT4TE15940	LTR/Gypsy	ATHILA2	315.193	5.89951	3.56694e-42
AT4TE23825	DNA/MuDR	VANDAL2	337.305	5.82902	3.59646e-42
AT2TE12825	DNA/MuDR	ATMU9	295.673	5.96113	4.56919e-42
AT5TE41265	LTR/Gypsy	ATHILA2	368.701	5.76031	5.5339e-42
AT4TE18625	LTR/Gypsy	ATHILA5	329.204	5.85603	6.19081e-42
AT3TE61075	LTR/Gypsy	ATHILA0_I	252.818	5.766	1.67924e-41
AT5TE39090	LTR/Gypsy	ATHILA5	364.415	5.80548	3.06542e-41
AT1TE47135	LTR/Gypsy	ATHILA5	1566.21	5.52028	3.90817e-41
AT1TE47355	LTR/Gypsy	ATHILA5	1566.02	5.52029	3.90817e-41
AT3TE62735	DNA/En-Spm	ATENSPM6	312.694	5.8774	4.74591e-41
AT2TE11540	LTR/Gypsy	ATGP2	681.362	5.37044	4.77503e-41
AT1TE46310	LTR/Gypsy	ATHILA3	396.287	5.65722	8.69961e-41
AT3TE63040	Unassigned	Unassigned	291.246	5.91126	9.42088e-41
AT5TE55140	DNA/MuDR	VANDAL7	232.535	5.91678	1.14678e-40
AT4TE08980	LTR/Gypsy	ATGP2	307.751	4.86923	1.3416e-40
AT5TE42975	LTR/Gypsy	ATHILA6A	290.114	5.8721	1.63274e-40
AT3TE56035	LTR/Gypsy	ATHILA6B	261.816	5.86518	1.72963e-40
AT4TE21140	DNA/En-Spm	ATENSPM10	284.066	5.82402	2.00377e-40
AT4TE46305	Unassigned	Unassigned	239.025	5.82466	2.09859e-40
AT1TE46190	LTR/Gypsy	ATHILA2	292.595	5.83442	2.24632e-40
AT3TE45330	SINE	ATSINE2A	257.457	5.6788	3.59548e-40
AT3TE49825	DNA/MuDR	VANDAL12	258.312	5.91332	4.38813e-40
AT4TE19470	LTR/Copia	ATCOPIA53	588.472	4.27654	5.1129e-40
AT5TE44130	LTR/Gypsy	ATHILA8A	371.425	5.79266	5.22965e-40
AT4TE09060	LTR/Gypsy	ATHILA5	359.143	5.77028	5.77186e-40
AT3TE59560	LTR/Gypsy	ATGP8	284.361	5.44462	6.07252e-40
AT4TE18685	LTR/Gypsy	ATHILA2	267.492	5.86728	6.58318e-40
AT3TE58620	LTR/Gypsy	ATHILA5	374.767	5.70124	7.37134e-40
AT5TE54510	DNA/MuDR	ATMU11	213.672	5.89245	8.17569e-40
AT4TE15285	LTR/Gypsy	ATHILA6A	263.586	5.78943	1.56443e-39
AT2TE21480	LTR/Gypsy	ATHILA2	583.742	5.57494	1.76464e-39
AT2TE27670	LINE/L1	ATLINE1_4	422.617	5.03271	1.88491e-39
AT2TE00035	LTR/Gypsy	ATGP2N	242.801	5.2184	1.95778e-39
AT5TE40275	LTR/Gypsy	ATHILA	1085.9	5.51134	2.55055e-39
AT2TE16820	LTR/Gypsy	ATHILA	631.137	5.47002	2.86569e-39
AT4TE54700	LTR/Gypsy	ATGP3	283.271	5.75831	3.32611e-39
AT3TE70590	DNA/MuDR	ARNOLD3	237.548	5.7278	4.87089e-39
AT2TE27465	LTR/Gypsy	ATLANTYS1	213.098	5.56002	5.0283e-39
AT5TE38615	DNA/MuDR	ATMU8	377.101	5.69905	5.09509e-39
AT5TE38320	DNA/En-Spm	ATENSPM7	263.701	5.78536	5.27951e-39
AT2TE00120	LTR/Gypsy	ATGP2N	245.328	4.98774	5.47393e-39
AT4TE18165	LTR/Gypsy	ATHILA5	272.231	5.75838	5.81805e-39
AT5TE41345	LTR/Gypsy	ATHILA2	310.885	5.67396	6.1805e-39
AT1TE47595	LTR/Gypsy	ATHILA5	1819.01	5.33231	9.38257e-39
AT2TE11355	LTR/Gypsy	ATHILA	1030.76	5.47341	1.00687e-38
AT2TE16805	LTR/Gypsy	ATHILA4	258.837	5.66223	1.38076e-38
AT1TE43030	LTR/Gypsy	ATGP7	262.832	5.737	1.39868e-38
AT1TE53050	LTR/Gypsy	ATHILA8A	328.949	5.67391	1.73215e-38
AT2TE20960	LTR/Gypsy	ATLANTYS1	214.413	5.6052	1.89314e-38
AT3TE52325	LTR/Gypsy	ATHILA0_I	329.303	5.66068	2.46812e-38
AT2TE21100	DNA/En-Spm	ATENSPM5	307.436	5.63861	2.70832e-38
AT4TE04415	DNA/Harbinger	ATIS112A	878.41	2.76519	3.54822e-38
AT4TE15750	LTR/Gypsy	ATHILA3	590.329	5.58571	5.18507e-38
AT4TE18595	LTR/Gypsy	ATHILA5	297.564	5.67837	5.61134e-38
AT2TE00015	LTR/Gypsy	ATGP2	379.992	3.73361	9.44876e-38
AT4TE14240	LTR/Gypsy	ATHILA5	393.129	5.59469	9.67083e-38
AT3TE21700	DNA/Harbinger	ATIS112A	567.811	3.52445	1.25293e-37
AT1TE49315	LTR/Gypsy	ATHILA2	240.539	5.78979	1.29294e-37
AT3TE57360	DNA/MuDR	VANDAL21	317.897	5.55566	1.41566e-37
AT5TE40570	DNA/En-Spm	ATENSPM6	255.912	5.71339	1.42781e-37
AT4TE15435	LTR/Gypsy	ATHILA3	375.457	5.42285	1.46424e-37
AT3TE62975	DNA/En-Spm	ATENSPM2	208.183	5.96626	1.77891e-37
AT2TE11300	LINE/L1	ATLINE1_6	763.282	5.43061	1.8904e-37
AT2TE16415	LTR/Gypsy	ATHILA4	225.934	5.71719	3.18223e-37
AT4TE09245	RC/Helitron	HELITRONY3	210.247	5.52831	3.41435e-37
AT4TE15950	LTR/Gypsy	ATHILA6A	220.073	5.7167	4.01945e-37
AT1TE46785	LTR/Gypsy	ATHILA0_I	264.961	5.66725	6.11018e-37
AT1TE51060	LTR/Gypsy	ATHILA	263.48	5.74273	6.36571e-37
AT5TE42270	LTR/Gypsy	ATGP2N	377.822	4.70172	8.56447e-37
AT5TE44205	LTR/Gypsy	ATHILA2	248.556	5.66787	1.05405e-36
AT2TE21295	DNA/MuDR	VANDAL3	180.09	5.73107	1.14983e-36
AT2TE20935	LTR/Gypsy	ATHILA5	274.744	5.63261	1.18547e-36
AT5TE42925	LTR/Gypsy	ATHILA2	415.984	5.53174	1.42537e-36
AT2TE21855	LTR/Copia	ATCOPIA27	199.694	5.90663	1.83464e-36
AT3TE59695	LTR/Gypsy	ATHILA2	275.345	5.60156	2.30189e-36
AT4TE16980	LTR/Gypsy	ATGP3	427.142	5.62347	2.31376e-36
AT2TE08225	LTR/Gypsy	ATGP3	557.705	3.56237	2.70345e-36
AT1TE43975	LTR/Copia	ATCOPIA43	806.203	5.34947	2.72687e-36
AT4TE18665	LTR/Gypsy	ATHILA2	257.086	5.69561	3.27672e-36
AT1TE47720	LTR/Gypsy	ATHILA2	300.923	5.52293	3.88417e-36
AT1TE53065	LTR/Gypsy	ATHILA4A	393.393	5.41123	4.24487e-36
AT2TE22230	LTR/Gypsy	ATHILA7	190.051	5.6491	4.65854e-36
AT3TE62570	DNA/HAT	ATHAT7	376.192	5.58636	6.3953e-36
AT4TE00230	LTR/Gypsy	ATGP2N	205.873	5.22241	7.54242e-36
AT1TE46685	LTR/Gypsy	ATHILA2	235.564	5.62073	8.80365e-36
AT4TE39815	LINE/L1	ATLINE1_2	261.471	5.56377	8.96831e-36
AT2TE21450	LTR/Gypsy	ATHILA2	484.795	5.07089	1.06363e-35
AT2TE28025	LTR/Gypsy	ATGP10	413.841	5.73411	1.22721e-35
AT5TE38370	DNA/En-Spm	ATENSPM7	345.97	5.41551	1.30818e-35
AT4TE19140	LTR/Gypsy	ATHILA6A	191.602	5.67562	1.48418e-35
AT1TE45375	DNA/En-Spm	ATENSPM3	572.058	5.70351	1.55342e-35
AT1TE48670	DNA/En-Spm	ATENSPM11	634.753	5.34227	1.98792e-35
AT3TE51740	DNA/En-Spm	ATENSPM7	212.688	5.62373	2.70061e-35
AT3TE53100	LTR/Gypsy	ATGP2N	325.582	5.5031	2.97e-35
AT2TE13950	LINE/L1	ATLINE1_2	285.034	5.07538	3.87949e-35
AT1TE46580	LTR/Gypsy	ATHILA2	204.354	5.62893	4.67618e-35
AT1TE23740	DNA/MuDR	VANDAL14	489.476	3.60112	4.89974e-35
AT3TE52315	LTR/Gypsy	ATHILA5	294.738	5.5263	5.11862e-35
AT4TE18055	LTR/Gypsy	ATHILA2	240.368	5.62339	5.3685e-35
AT3TE63400	DNA/HAT	ATHATN6	228.553	4.67824	5.37188e-35
AT2TE13355	LTR/Gypsy	ATHILA6A	204.822	5.59644	1.14223e-34
AT5TE43075	LTR/Gypsy	ATHILA4C	189.294	5.57197	1.29057e-34
AT4TE15585	LTR/Gypsy	ATHILA4C	325.568	5.44095	1.2921e-34
AT5TE25535	RC/Helitron	ATREP12	128.7	5.69094	1.3291e-34
AT1TE51700	LTR/Gypsy	ATGP1	1356.54	4.99487	2.3564e-34
AT5TE43825	LTR/Gypsy	ATHILA2	221.126	5.55584	2.36211e-34
AT3TE54180	LTR/Gypsy	ATLANTYS2	171.49	5.75679	2.7583e-34
AT1TE51705	LTR/Gypsy	ATHILA	1354.38	4.98421	3.6884e-34
AT3TE60160	LTR/Gypsy	ATGP1	233.156	5.51229	4.80921e-34
AT3TE50125	LTR/Copia	ATCOPIA43	2578.76	4.72041	9.02211e-34
AT4TE24910	LTR/Copia	ATCOPIA9	343.469	5.21479	9.28622e-34
AT5TE43435	LTR/Gypsy	ATHILA6A	359.34	5.32697	1.11638e-33
AT5TE37665	LTR/Gypsy	ATGP7	396.584	5.25746	1.53062e-33
AT4TE18065	LTR/Gypsy	ATHILA2	241.257	5.45921	1.83405e-33
AT4TE09780	DNA/En-Spm	ATENSPM9	430.279	5.48033	1.88687e-33
AT3TE51675	LTR/Copia	ATCOPIA43	736.176	5.48765	2.91658e-33
AT5TE31200	LTR/Copia	ATCOPIA22	370.015	5.21985	3.79467e-33
AT1TE51370	LTR/Gypsy	ATHILA2	226.291	5.4983	3.95639e-33
AT5TE50380	LTR/Copia	ATCOPIA91	258.093	4.21968	6.38613e-33
AT4TE09580	DNA/En-Spm	ATENSPM4	259.126	5.51908	2.53873e-32
AT5TE42350	LTR/Gypsy	ATHILA2	171.357	5.36318	3.09448e-32
AT3TE50560	LTR/Gypsy	ATHILA8B	288.912	5.38648	3.83835e-32
AT2TE06610	DNA/En-Spm	ATENSPM5	619.913	5.86617	3.96424e-32
AT3TE49725	DNA/En-Spm	ATENSPM2	246.867	5.43036	8.98097e-32
AT1TE47730	LTR/Gypsy	ATHILA6A	228.08	5.3524	9.29198e-32
AT4TE22970	DNA/MuDR	VANDAL8	202.727	5.28255	1.14029e-31
AT2TE10975	LTR/Gypsy	ATHILA8A	330.155	5.20865	1.2426e-31
AT2TE08110	DNA/MuDR	ARNOLD2	235.265	5.46937	1.24431e-31
AT3TE53690	LTR/Gypsy	ATHILA	2831.02	4.90494	2.0467e-31
AT3TE57340	LTR/Gypsy	ATHILA2	200.837	5.43003	2.15405e-31
AT4TE19905	LTR/Gypsy	ATHILA2	625.259	5.21994	2.573e-31
AT1TE52925	DNA/HAT	ATHAT3	1548.26	4.90158	2.6254e-31
AT1TE41575	LTR/Copia	ATCOPIA93	1067.17	4.75506	2.69832e-31
AT2TE16030	LTR/Copia	ATCOPIA33	779.655	4.94314	3.28653e-31
AT2TE24335	DNA/MuDR	ARNOLD2	185.021	5.4435	3.4377e-31
AT2TE15415	LTR/Gypsy	ATGP10	666.217	5.13432	4.09404e-31
AT5TE43620	LTR/Gypsy	ATHILA5	198.838	5.38338	4.95047e-31
AT5TE58755	LINE/L1	ATLINE2	158.968	5.39575	5.67374e-31
AT4TE46310	DNA/MuDR	VANDAL12	155.032	5.46901	6.49086e-31
AT5TE47155	LTR/Gypsy	ATHILA5	318.475	5.23535	7.31611e-31
AT3TE34430	DNA/HAT	TAG2	169.94	5.42811	7.53658e-31
AT3TE62595	DNA/MuDR	VANDAL17	216.579	4.91809	7.55121e-31
AT4TE18655	LTR/Gypsy	ATHILA4A	201.593	5.40599	9.27192e-31
AT2TE26380	DNA/En-Spm	ATENSPM3	2149.84	4.90024	9.79266e-31
AT2TE05665	RC/Helitron	ATREP3	185.678	5.37412	1.1506e-30
AT1TE51245	LTR/Gypsy	ATGP2N	165.552	5.29056	1.28022e-30
AT4TE12620	LTR/Gypsy	ATGP2N	155.824	4.91467	1.30054e-30
AT1TE53095	LTR/Copia	ATCOPIA58	273.229	5.28866	1.74264e-30
AT4TE15820	LTR/Gypsy	ATLANTYS2	6844.99	6.01363	2.24203e-30
AT4TE15005	LTR/Gypsy	ATHILA3	466.492	5.24328	2.31075e-30
AT2TE25840	DNA/MuDR	VANDAL2	211.151	5.06957	2.45319e-30
AT5TE43575	LINE/L1	ATLINE2	272.204	5.37283	2.62907e-30
AT2TE18240	DNA/Harbinger	ATIS112A	252.537	4.6939	2.68151e-30
AT3TE61640	LTR/Gypsy	ATHILA2	196.893	5.32752	4.28994e-30
AT2TE16265	LTR/Gypsy	ATHILA2	187.704	5.33338	4.42971e-30
AT3TE67325	DNA/HAT	ATHAT2	434.238	4.29436	5.3781e-30
AT4TE15890	DNA/MuDR	VANDAL8	176.602	5.20385	5.92584e-30
AT2TE20965	LTR/Gypsy	ATGP2N	147.325	5.28044	5.96124e-30
AT1TE50895	LTR/Gypsy	ATHILA2	177.59	5.32695	6.967e-30
AT3TE52665	DNA/MuDR	VANDAL21	161.975	5.36309	7.68087e-30
AT2TE12470	LTR/Copia	ATCOPIA68	431.177	5.09909	9.7501e-30
AT5TE43070	LTR/Gypsy	ATGP7	169.913	5.41915	9.79441e-30
AT3TE51300	LTR/Gypsy	ATHILA2	206.75	5.30922	1.27251e-29
AT3TE59885	DNA/MuDR	ATMU9	160.612	5.35602	1.61461e-29
AT4TE09135	LINE/L1	ATLINE2	195.075	5.20299	1.91877e-29
AT3TE41650	DNA/MuDR	VANDAL5A	259.466	4.73096	1.99101e-29
AT5TE42360	LTR/Gypsy	ATHILA5	677.432	4.93316	1.99601e-29
AT5TE42365	LTR/Gypsy	ATHILA	677.038	4.93317	2.0047e-29
AT3TE57315	DNA/En-Spm	ATENSPM10	332.794	5.02749	3.6914e-29
AT2TE28280	DNA/HAT	TAG2	196.908	5.01882	4.05633e-29
AT1TE46305	LTR/Gypsy	ATHILA0_I	497.293	5.05949	4.12734e-29
AT4TE09385	LTR/Gypsy	ATLANTYS1	128.869	5.35594	4.91448e-29
AT4TE20815	DNA/En-Spm	ATENSPM5	170.3	5.176	5.08997e-29
AT5TE43910	LTR/Gypsy	ATGP10	252.474	5.21261	6.82949e-29
AT1TE48780	LTR/Gypsy	ATHILA	364.844	5.0945	7.32615e-29
AT1TE47360	LTR/Gypsy	ATHILA5	809.726	4.82747	7.66454e-29
AT1TE47140	LTR/Gypsy	ATHILA5	809.909	4.82742	7.66972e-29
AT2TE16510	DNA/En-Spm	ATENSPM5	154.066	5.32794	7.66981e-29
AT1TE52610	DNA/En-Spm	ATENSPM2	220.451	5.21802	8.37279e-29
AT2TE22065	LTR/Gypsy	ATGP5	176.177	5.22782	8.62155e-29
AT3TE59490	LTR/Gypsy	ATGP10	659.696	5.02698	1.11873e-28
AT5TE42035	LTR/Gypsy	ATLANTYS2	162.605	5.28055	1.14511e-28
AT1TE54640	DNA/En-Spm	ATENSPM5	159.291	5.24254	1.40207e-28
AT5TE44055	LTR/Gypsy	ATHILA2	178.649	5.16335	1.45745e-28
AT2TE41170	DNA/Harbinger	ATIS112A	194.232	4.0857	1.62994e-28
AT2TE17305	LTR/Gypsy	ATGP3	413.344	4.92144	1.67078e-28
AT3TE59605	LTR/Gypsy	ATHILA2	178.346	5.15821	1.8503e-28
AT4TE09560	LTR/Gypsy	ATLANTYS2	108.615	5.54837	1.94025e-28
AT4TE08985	LTR/Gypsy	ATGP2N	191.808	4.59501	1.98411e-28
AT2TE19620	LTR/Gypsy	ATHILA4B_LTR	215.79	5.39269	2.13028e-28
AT5TE18470	DNA/MuDR	ATMU10	107.92	5.39106	2.42488e-28
AT1TE39375	DNA/MuDR	VANDAL12	163.509	5.38101	4.86877e-28
AT2TE10575	LTR/Gypsy	ATHILA4C	224.595	4.78401	5.09661e-28
AT5TE49130	DNA/HAT	ATHAT3	286.19	5.2428	6.08173e-28
AT3TE61615	LTR/Gypsy	ATHILA2	163.793	5.25795	7.97998e-28
AT2TE16955	DNA/En-Spm	ATENSPM3	356.588	4.64655	8.17663e-28
AT5TE38020	DNA/Harbinger	ATIS112A	177.792	5.07118	8.20512e-28
AT3TE53095	LTR/Gypsy	ATLANTYS2	299.109	5.08008	8.59114e-28
AT3TE50295	DNA/MuDR	ARNOLD2	163.572	5.24485	1.14308e-27
AT5TE47505	LTR/Gypsy	ATHILA3	178.337	5.18555	1.39917e-27
AT3TE47775	DNA/En-Spm	ATENSPM6	186.93	5.22187	1.40292e-27
AT3TE40125	DNA/MuDR	ATDNAI27T9A	263.223	3.73749	1.755e-27
AT5TE46910	LTR/Gypsy	ATHILA8B	281.787	5.06433	2.18305e-27
AT5TE52850	DNA/MuDR	ATMU4	158.093	5.34679	2.58331e-27
AT4TE14410	LTR/Gypsy	ATHILA2	183.608	5.14539	2.71488e-27
AT4TE13070	DNA/HAT	TAG2	154.97	4.99382	3.89189e-27
AT4TE09570	LTR/Gypsy	ATGP10	583.555	5.54014	4.26138e-27
AT3TE61530	LTR/Gypsy	ATHILA3	1268.2	4.74392	4.34733e-27
AT1TE52860	DNA/Harbinger	ATIS112A	379.674	3.49474	4.60375e-27
AT3TE53865	LTR/Gypsy	ATGP5	270.983	5.04865	5.24885e-27
AT2TE13955	LTR/Gypsy	ATGP2	189.392	4.71433	7.28489e-27
AT2TE00110	LTR/Gypsy	ATGP2	186.096	4.55481	7.636e-27
AT3TE62015	LTR/Gypsy	ATHILA2	158.474	5.16728	1.18841e-26
AT5TE43630	LTR/Gypsy	ATHILA5	175.535	5.1035	1.71859e-26
AT4TE19910	LTR/Gypsy	ATHILA0_I	228.768	5.19282	1.86004e-26
AT5TE52855	DNA/MuDR	ATMU1	155.099	5.39926	2.06264e-26
AT5TE49335	DNA/MuDR	VANDAL2	191.633	4.97451	2.10212e-26
AT5TE43375	LTR/Gypsy	ATGP2N	145.163	4.93061	2.20378e-26
AT3TE56040	LTR/Gypsy	ATGP3	779.192	4.7421	2.28625e-26
AT4TE20545	DNA/En-Spm	ATENSPM3	252.094	5.02002	2.62309e-26
AT4TE17070	LTR/Gypsy	ATHILA2	139.026	5.4487	3.05717e-26
AT3TE57685	LTR/Gypsy	ATHILA	539.992	4.59482	3.4398e-26
AT1TE54655	LTR/Gypsy	ATHILA5	133.689	5.22044	3.63206e-26
AT5TE39230	DNA/MuDR	VANDAL8	126.09	4.92387	5.25354e-26
AT3TE70530	LTR/Gypsy	ATGP2N	166.495	4.74836	6.4435e-26
AT5TE81385	LTR/Copia	ATCOPIA13	108.596	5.24034	7.07413e-26
AT2TE11330	LTR/Gypsy	ATHILA2	175.635	5.10714	7.59077e-26
AT2TE19485	LTR/Gypsy	ATHILA6B	377.192	4.90348	8.06989e-26
AT2TE15565	LINE/L1	ATLINE1_2	165.667	5.05722	8.72386e-26
AT5TE41770	DNA/En-Spm	ATENSPM11	150.044	4.89982	1.2572e-25
AT2TE20450	LTR/Gypsy	ATLANTYS1	141.214	5.10918	1.51346e-25
AT3TE54710	LTR/Gypsy	ATHILA0_I	1305.36	4.59992	1.64491e-25
AT1TE49325	LTR/Gypsy	ATHILA2	252.937	5.04316	1.71176e-25
AT4TE21185	LTR/Gypsy	ATHILA5	179.265	5.04299	1.9361e-25
AT4TE09180	LINE/L1	ATLINE1_6	141.24	5.02326	1.96003e-25
AT2TE18155	DNA/MuDR	ATMU6	223.881	4.89818	2.47799e-25
AT3TE40530	DNA/MuDR	VANDAL14	370.802	3.49697	3.21686e-25
AT3TE57145	LTR/Gypsy	ATHILA6A	175.081	5.03906	3.24351e-25
AT3TE83700	SINE	ATSINE2A	172.224	4.66261	4.32797e-25
AT5TE65330	DNA/MuDR	VANDAL14	372.317	3.46839	4.48472e-25
AT5TE15640	LINE/L1	ATLINE2	226.451	4.60475	6.45109e-25
AT5TE46485	LTR/Gypsy	ATHILA6A	221.086	4.97688	7.84847e-25
AT5TE43400	LTR/Gypsy	ATHILA2	261.373	4.79838	1.21966e-24
AT4TE08445	LTR/Gypsy	ATLANTYS2	96.1656	5.36133	1.30929e-24
AT5TE41325	LTR/Gypsy	ATHILA2	165.837	4.85366	1.37412e-24
AT4TE13290	LTR/Gypsy	ATHILA2	173.836	5.04223	1.56204e-24
AT1TE45870	DNA/En-Spm	ATENSPM9	166.372	4.9597	1.98019e-24
AT1TE45860	LTR/Gypsy	ATGP2N	127.993	4.80933	2.34539e-24
AT2TE10260	DNA/En-Spm	ATENSPM7	121.641	5.05089	4.32205e-24
AT5TE24040	DNA/MuDR	ATDNAI27T9A	322.022	3.13141	4.33057e-24
AT2TE10570	LTR/Gypsy	ATHILA4C	191.648	4.48753	4.59507e-24
AT2TE38245	DNA/MuDR	ATDNAI27T9A	229.112	3.55866	4.64479e-24
AT5TE43905	LTR/Gypsy	ATHILA8B	270.784	4.88488	5.2719e-24
AT1TE59135	DNA/MuDR	ATMU3	133.108	4.9245	6.7045e-24
AT5TE45005	LTR/Gypsy	ATHILA3	352.091	4.78501	8.55873e-24
AT1TE51020	LTR/Gypsy	ATHILA2	161.761	4.92412	1.15702e-23
AT4TE36845	LTR/Copia	ATCOPIA17	265.962	4.65367	1.40484e-23
AT2TE26370	DNA/En-Spm	ATENSPM7	955.555	4.44033	1.5393e-23
AT3TE61070	LTR/Gypsy	ATHILA5	111.102	5.02471	1.8507e-23
AT5TE40675	LTR/Gypsy	ATHILA2	139.248	4.9338	2.17196e-23
AT5TE65370	LTR/Copia	ATCOPIA21	199.636	4.60041	2.5007e-23
AT1TE09080	DNA/MuDR	VANDAL14	370.555	3.36863	3.01994e-23
AT5TE42860	LTR/Gypsy	ATHILA3	219.57	4.79912	4.38555e-23
AT4TE19040	LTR/Gypsy	ATHILA6A	116.23	4.97475	4.60893e-23
AT5TE46040	LTR/Gypsy	ATHILA5	710.337	4.56449	4.84558e-23
AT2TE54910	DNA/MuDR	VANDAL14	330.661	3.42723	5.44629e-23
AT2TE12230	LTR/Gypsy	ATGP2N	130.431	4.80772	7.03196e-23
AT1TE51105	DNA/En-Spm	ATENSPM7	511.266	4.66308	8.85426e-23
AT2TE21445	LTR/Gypsy	ATHILA6A	466.316	4.62686	1.23231e-22
AT5TE36335	LTR/Copia	ATCOPIA19	317.776	4.66873	1.58512e-22
AT4TE13565	LTR/Gypsy	ATHILA3	168.204	4.8021	1.62935e-22
AT3TE53630	LINE/L1	ATLINE1_1	230.336	4.80473	1.84621e-22
AT5TE43275	LTR/Gypsy	ATHILA6A	129.518	5.0989	2.85339e-22
AT1TE53090	LTR/Copia	ENDOVIR1	494.517	4.60868	3.19691e-22
AT4TE09080	DNA/MuDR	VANDAL21	112.54	4.71334	3.92329e-22
AT2TE15660	DNA/Harbinger	HARBINGER	176.285	4.77969	4.06564e-22
AT3TE52300	LTR/Gypsy	ATHILA4C	129.803	4.88994	4.45669e-22
AT5TE46970	DNA/MuDR	ARNOLD3	121.943	4.91375	4.76261e-22
AT4TE16560	LTR/Gypsy	ATGP7	149.939	4.85003	4.82236e-22
AT1TE46585	LTR/Gypsy	ATHILA2	121.215	4.87559	5.2994e-22
AT4TE09310	DNA/MuDR	ARNOLD3	146.313	4.92612	5.86615e-22
AT2TE41090	DNA/HAT	SIMPLEHAT2	121.64	4.66679	6.2755e-22
AT1TE76735	RC/Helitron	HELITRONY1E	132.854	4.82794	6.30394e-22
AT5TE44360	LTR/Gypsy	ATHILA2	151.811	4.86952	7.0548e-22
AT4TE19180	LTR/Gypsy	ATHILA2	144.405	4.79741	7.18718e-22
AT2TE00075	LTR/Gypsy	ATGP2	166.591	3.89698	7.39987e-22
AT1TE46825	DNA/MuDR	VANDAL3	72.1031	5.14188	7.52604e-22
AT2TE28030	LTR/Gypsy	ATGP10	215.017	4.83491	7.73713e-22
AT3TE51685	LTR/Gypsy	ATGP6	117.821	4.84707	8.66923e-22
AT5TE43855	DNA/En-Spm	ATENSPM3	1770.49	4.44134	1.16267e-21
AT5TE45000	DNA/En-Spm	ATENSPM5	137.695	4.37961	1.16323e-21
AT1TE42490	LTR/Copia	ATCOPIA95	84.4219	5.00489	1.20106e-21
AT3TE57550	LTR/Gypsy	ATGP2N	208.662	4.43274	1.30102e-21
AT5TE46685	LTR/Gypsy	ATHILA4C	215.937	4.70217	1.42377e-21
AT5TE48195	DNA/Harbinger	ATIS112A	223.978	4.67251	1.88128e-21
AT5TE52845	DNA/MuDR	ATMU11	111.322	5.05498	1.93684e-21
AT1TE86360	LTR/Copia	ATCOPIA11	1062.04	4.11985	2.06829e-21
AT3TE51655	LTR/Gypsy	ATHILA6A	82.4341	5.01071	2.7126e-21
AT2TE10985	LTR/Gypsy	ATHILA6A	338.595	4.56726	2.77647e-21
AT5TE47750	LINE/L1	ATLINEIII	131.283	4.26457	3.04205e-21
AT1TE53380	LTR/Gypsy	ATHILA4D_LTR	132.587	4.82603	4.27578e-21
AT4TE16165	LTR/Gypsy	ATLANTYS1	120.098	4.81534	4.32459e-21
AT2TE01560	LINE/L1	TA11	110.312	4.78483	4.3316e-21
AT5TE50150	RC/Helitron	HELITRONY3	103.564	4.77277	5.87265e-21
AT1TE50945	LTR/Gypsy	ATHILA2	133.466	4.79074	6.54981e-21
AT4TE16175	LTR/Gypsy	ATHILA6A	114.958	4.8456	7.06693e-21
AT1TE40940	LTR/Gypsy	ATGP2N	157.386	3.97649	8.26538e-21
AT4TE44395	DNA/HAT	ATHAT1	95.7223	4.83448	8.8014e-21
AT1TE53385	LTR/Copia	ATCOPIA94	106.871	4.82134	8.90715e-21
AT5TE42670	LTR/Gypsy	ATHILA2	198.239	4.69825	8.93427e-21
AT4TE09000	DNA/MuDR	VANDAL3	104.443	4.8417	1.44782e-20
AT4TE17480	LTR/Gypsy	ATHILA	432.639	4.41796	1.73085e-20
AT1TE49740	DNA/En-Spm	ATENSPM7	1643.9	4.0704	2.17192e-20
AT2TE20030	DNA/En-Spm	ATENSPM11	135.355	4.72772	2.603e-20
AT1TE46385	LTR/Gypsy	ATHILA2	481.655	4.43504	3.23167e-20
AT1TE46805	LTR/Gypsy	ATHILA3	500.328	4.1708	3.65107e-20
AT4TE14305	LTR/Gypsy	ATHILA2	110.174	4.74508	4.11797e-20
AT2TE28160	LTR/Copia	ATCOPIA38	163.595	4.52881	9.35904e-20
AT3TE54575	DNA/MuDR	ATMU9	231.646	4.61676	1.0315e-19
AT5TE41600	DNA/En-Spm	ATENSPM1A	176.344	4.57381	1.04974e-19
AT3TE37060	DNA/MuDR	VANDAL2	98.3747	4.78342	1.17503e-19
AT4TE16150	LTR/Gypsy	ATHILA2	453.456	4.49944	1.4123e-19
AT2TE16590	LTR/Gypsy	ATHILA2	98.5961	4.75495	1.61814e-19
AT2TE20035	RC/Helitron	HELITRONY1D	146.876	4.69478	1.79315e-19
AT4TE28870	LTR/Copia	ATCOPIA17	170.359	4.6182	1.87779e-19
AT4TE18610	LTR/Gypsy	ATHILA3	263.435	4.46447	2.09431e-19
AT1TE44910	DNA/MuDR	VANDAL21	93.8725	4.74682	2.18405e-19
AT3TE55475	LTR/Gypsy	ATGP3	658.704	4.36784	2.53654e-19
AT1TE31190	DNA/MuDR	VANDAL2	130.899	4.4555	3.14853e-19
AT5TE48205	DNA/HAT	ATHAT7	148.292	4.65491	3.26938e-19
AT2TE20945	LTR/Gypsy	ATGP2N	119.155	4.60452	3.64693e-19
AT4TE17500	LTR/Gypsy	ATHILA	257.837	4.33505	3.71374e-19
AT3TE57085	LTR/Gypsy	ATLANTYS2	107.261	4.69209	3.94506e-19
AT1TE56420	DNA/MuDR	VANDAL1	57.0115	5.05484	4.89368e-19
AT1TE56425	DNA/MuDR	VANDAL1	57.0115	5.05484	4.89368e-19
AT5TE46175	DNA/MuDR	VANDAL20	209.135	4.60936	6.0742e-19
AT5TE43635	LTR/Gypsy	ATHILA0_I	124.71	4.61909	6.14008e-19
AT2TE29450	LTR/Copia	ATCOPIA70	111.96	4.32183	6.26614e-19
AT4TE21160	LTR/Gypsy	ATGP2N	133.522	4.32346	6.71129e-19
AT3TE63180	DNA/Harbinger	ATIS112A	75.9753	4.81371	6.79367e-19
AT2TE77015	LTR/Gypsy	ATGP9B	247.593	3.23951	9.0306e-19
AT5TE51000	LINE/L1	TA11	111.522	4.5375	9.07444e-19
AT2TE20665	LTR/Gypsy	ATGP5	83.2154	4.66424	1.2991e-18
AT4TE18645	LTR/Copia	ATCOPIA42	152.959	4.51758	1.47877e-18
AT5TE36720	DNA/En-Spm	ATENSPM2	102.733	4.6251	1.50567e-18
AT2TE18895	LTR/Gypsy	ATHILA6A	198.521	4.47355	1.83135e-18
AT3TE54950	DNA/En-Spm	ATENSPM3	216.545	4.41684	2.19364e-18
AT4TE09925	LTR/Gypsy	ATGP5	111.979	4.56031	3.38029e-18
AT2TE23965	DNA/MuDR	VANDAL13	103.644	4.60279	3.38071e-18
AT5TE57495	LTR/Gypsy	ATLANTYS1	154.223	4.53846	3.62175e-18
AT1TE47725	LTR/Gypsy	ATHILA2	117.53	4.63791	3.78866e-18
AT2TE20000	DNA/En-Spm	ATENSPM3	106.755	4.62308	4.11369e-18
AT5TE41835	LTR/Gypsy	ATHILA6A	105.783	4.53138	4.18667e-18
AT2TE20435	LTR/Gypsy	ATLANTYS1	74.599	4.71149	4.21708e-18
AT3TE50050	LTR/Gypsy	ATHILA8B	193.725	4.41135	4.43787e-18
AT4TE21175	LTR/Gypsy	ATHILA5	137.492	4.51952	5.27936e-18
AT5TE45055	LTR/Gypsy	ATHILA0_I	439.455	4.34079	5.49808e-18
AT3TE63215	DNA/MuDR	VANDAL8	94.7413	4.60195	5.78475e-18
AT2TE41175	RC/Helitron	HELITRONY1D	165.255	3.69226	6.37422e-18
AT4TE19145	LTR/Gypsy	ATHILA2	104.806	4.5894	7.07066e-18
AT4TE13995	LTR/Gypsy	ATHILA6A	117.685	4.52025	7.32956e-18
AT2TE78320	SINE	ATSINE2A	181.653	3.48842	7.35997e-18
AT5TE42920	LTR/Gypsy	ATHILA2	178.484	4.42824	7.40772e-18
AT5TE42940	LTR/Gypsy	ATHILA2	205.707	4.37921	8.26525e-18
AT5TE38070	DNA/MuDR	VANDAL1	64.2061	4.71216	8.59527e-18
AT2TE08665	LINE/L1	ATLINE1_6	52.6019	5.01937	1.07484e-17
AT1TE53055	LTR/Gypsy	ATHILA8A	140.281	4.45298	1.18869e-17
AT5TE36235	Unassigned	SADHU	88.8681	4.53531	1.2446e-17
AT4TE18710	LTR/Gypsy	ATHILA2	103.215	4.61449	1.32436e-17
AT5TE51970	DNA/MuDR	VANDAL2	82.2414	4.54951	1.53676e-17
AT2TE06615	DNA/En-Spm	ATENSPM9	376.983	4.88568	1.56482e-17
AT3TE54815	DNA/MuDR	ARNOLD3	96.451	4.5019	1.59837e-17
AT3TE62260	DNA/MuDR	VANDAL2	75.4463	4.56855	1.95892e-17
AT1TE27905	DNA/Harbinger	ATIS112A	73.9121	4.65988	2.2069e-17
AT4TE06710	LTR/Copia	ATCOPIA2	184.808	3.32138	2.26686e-17
AT4TE18620	LTR/Gypsy	ATHILA5	108.707	4.48509	3.13079e-17
AT5TE66505	DNA/MuDR	VANDAL6	81.8358	4.56354	3.54433e-17
AT5TE46860	LTR/Gypsy	ATGP10	457.921	4.16575	3.62326e-17
AT3TE57565	LTR/Gypsy	ATGP10	145.252	4.38528	4.06586e-17
AT4TE10680	DNA/En-Spm	ATENSPM11	113.182	4.46922	4.77386e-17
AT3TE51290	DNA/En-Spm	ATENSPM9	110.929	4.46373	5.05943e-17
AT5TE58750	LINE/L1	ATLINEIII	83.4923	4.55899	5.06269e-17
AT5TE42715	LTR/Gypsy	ATHILA6B	103.642	4.47326	6.06671e-17
AT4TE15555	LTR/Gypsy	ATGP10	183.225	4.56289	6.49061e-17
AT1TE43035	LTR/Gypsy	ATGP7	100.088	4.49991	7.208e-17
AT1TE54530	LINE?	TSCL	66.3699	4.66778	7.48429e-17
AT4TE18365	LTR/Gypsy	ATHILA4C	156.933	4.23144	8.33352e-17
AT2TE20585	LTR/Gypsy	ATHILA4C	90.6082	4.48653	1.13285e-16
AT2TE21530	LTR/Gypsy	ATLANTYS2	160.934	4.32217	1.19208e-16
AT4TE14445	LTR/Gypsy	ATGP2N	76.1461	4.56097	1.2412e-16
AT2TE11900	DNA/MuDR	VANDAL1	55.8279	4.69675	1.30442e-16
AT5TE74320	DNA/HAT	ATHAT1	87.1897	4.48568	1.31699e-16
AT4TE15755	LTR/Gypsy	ATHILA6A	162.218	4.34025	1.42786e-16
AT5TE52200	DNA/MuDR	VANDAL2	96.5713	4.2337	2.05686e-16
AT5TE61740	LTR/Copia	ATCOPIA62	129.909	4.46789	2.28604e-16
AT3TE62455	LTR/Copia	ATCOPIA33	1095.45	4.04209	2.38262e-16
AT1TE29060	DNA/MuDR	VANDAL2	112.23	4.26767	2.4847e-16
AT3TE53850	LTR/Gypsy	ATGP7	658.392	4.45411	2.70498e-16
AT4TE19030	LTR/Gypsy	ATHILA4C	123.472	4.36835	3.62279e-16
AT5TE42320	LTR/Gypsy	ATHILA5	98.2224	4.50079	4.03696e-16
AT2TE13145	DNA/MuDR	ARNOLD4	89.1628	4.49601	4.24351e-16
AT4TE16510	DNA/HAT	ATHAT2	90.9112	4.42563	5.04199e-16
AT2TE18825	LTR/Gypsy	ATGP3	109.165	4.36797	5.13807e-16
AT3TE53860	LTR/Gypsy	ATGP1	189.883	4.03028	5.7953e-16
AT2TE11555	DNA/En-Spm	ATENSPM1	90.0604	4.41706	6.80859e-16
AT5TE43985	LTR/Gypsy	ATHILA6A	95.1962	4.38753	6.93122e-16
AT3TE58605	LTR/Gypsy	ATHILA4C	291.133	4.28281	7.03421e-16
AT3TE62450	DNA/MuDR	VANDAL22	1098.73	3.8496	7.69331e-16
AT4TE09505	DNA/MuDR	ARNOLD2	80.3018	4.47806	9.63436e-16
AT1TE56120	RathE1_cons	RathE1_cons	46.5975	4.84985	1.0907e-15
AT1TE51050	LTR/Gypsy	ATHILA6B	109.437	4.3544	1.12116e-15
AT2TE09635	DNA/En-Spm	ATENSPM3	111.449	4.33137	1.13992e-15
AT5TE56585	LTR/Copia	ATCOPIA25	89.4038	4.37178	1.47204e-15
AT1TE41460	DNA/MuDR	VANDAL2	103.304	4.35167	1.47921e-15
AT3TE55155	LTR/Gypsy	ATHILA6B	339.6	4.11845	1.51533e-15
AT4TE13375	LTR/Gypsy	ATHILA0_I	213.22	4.11947	1.5635e-15
AT3TE60155	LTR/Gypsy	ATGP8	93.132	4.35875	1.61825e-15
AT5TE46760	LTR/Gypsy	ATHILA2	97.8583	4.3944	1.71575e-15
AT5TE26805	DNA/MuDR	ATDNAI27T9B	75.0529	4.37804	1.74456e-15
AT3TE51900	LTR/Copia	ATCOPIA28	60.9818	4.57303	2.09023e-15
AT4TE20540	DNA/En-Spm	ATENSPM3	172.132	4.20392	2.34624e-15
AT2TE11015	DNA/MuDR	VANDAL17	118.201	4.24733	2.90255e-15
AT2TE25355	DNA/MuDR	ATMU5	86.3049	4.36187	3.43677e-15
AT1TE53825	DNA/MuDR	ATDNA1T9A	81.1185	4.31309	3.45836e-15
AT4TE15415	LTR/Gypsy	ATHILA5	93.5419	4.30445	4.60928e-15
AT1TE51475	LTR/Gypsy	ATHILA6A	87.4333	4.37376	4.64474e-15
AT2TE12310	LTR/Gypsy	ATHILA4A	120.317	4.1964	5.08171e-15
AT3TE50630	LTR/Gypsy	ATHILA	519.617	3.86215	5.64651e-15
AT4TE15615	DNA/MuDR	VANDAL21	94.0561	4.30161	5.69234e-15
AT2TE17935	LINE/L1	ATLINE1_6	130.764	4.21664	6.69212e-15
AT5TE37660	LTR/Gypsy	ATGP3	193.091	4.05814	6.80823e-15
AT3TE59045	DNA	ATDNA12T3_2	79.8104	4.33381	7.41132e-15
AT5TE40350	LTR/Gypsy	ATGP2	89.9807	4.12153	7.55537e-15
AT4TE15275	LTR/Gypsy	ATHILA2	83.8672	4.32359	8.07326e-15
AT5TE38280	LINE/L1	TA11	98.559	4.31151	8.14076e-15
AT3TE52540	DNA/MuDR	VANDAL21	76.0924	4.23376	9.18592e-15
AT3TE51810	LTR/Gypsy	ATHILA2	350.498	3.99929	9.66479e-15
AT5TE40580	DNA/En-Spm	ATENSPM5	82.6685	4.35144	9.66479e-15
AT5TE66565	LTR/Copia	ATCOPIA31	149.282	3.53185	9.71757e-15
AT5TE50155	RC/Helitron	HELITRONY3	103.213	4.31639	1.07662e-14
AT5TE47105	DNA/MuDR	VANDAL2	86.2215	4.29515	1.08643e-14
AT2TE20670	LTR/Gypsy	ATGP5	66.1637	4.39438	1.20993e-14
AT1TE44670	LTR/Gypsy	ATHILA6B	211.789	4.11906	1.21227e-14
AT5TE38365	DNA/En-Spm	ATENSPM10	93.708	4.21381	1.31759e-14
AT1TE41485	DNA/MuDR	ATDNAI27T9B	74.4378	4.3979	1.34766e-14
AT4TE07415	DNA/En-Spm	ATENSPM1A	109.478	4.29812	1.45132e-14
AT2TE17940	LTR/Gypsy	ATHILA2	118.798	4.20772	1.4723e-14
AT1TE48785	LTR/Gypsy	ATHILA6A	164.89	4.14459	1.50936e-14
AT2TE10945	LTR/Gypsy	ATHILA4	102.611	4.33231	1.54612e-14
AT3TE52630	Unassigned	SADHU	209.101	4.01619	1.70239e-14
AT3TE52625	RC/Helitron	HELITRON1	211.962	3.96995	1.70792e-14
AT2TE21475	LTR/Gypsy	ATHILA2	329.147	4.08068	1.8087e-14
AT4TE14225	LTR/Gypsy	ATHILA3	145.735	4.08009	1.87126e-14
AT1TE50315	LTR/Gypsy	ATLANTYS2	55.9149	4.46924	1.88739e-14
AT1TE50775	LTR/Gypsy	ATLANTYS2	55.9149	4.46924	1.88739e-14
AT2TE20930	LTR/Gypsy	ATHILA5	92.0411	4.19491	2.11455e-14
AT5TE43810	LTR/Gypsy	ATHILA2	84.0919	4.23499	2.20886e-14
AT2TE37435	RC/Helitron	ATREP12	77.6789	4.04737	2.26806e-14
AT2TE16390	DNA/En-Spm	ATENSPM10	532.278	3.9062	2.61225e-14
AT5TE40520	DNA/En-Spm	ATENSPM6	71.4899	4.32409	3.12903e-14
AT4TE09510	DNA/MuDR	ARNOLD2	68.7558	4.34549	3.13964e-14
AT5TE43205	LTR/Gypsy	ATGP1	90.9426	4.31393	3.39909e-14
AT2TE25360	DNA/MuDR	ATMU5	81.9292	4.26722	3.57555e-14
AT4TE16750	LTR/Gypsy	ATHILA4B_LTR	86.2158	4.25815	3.65138e-14
AT3TE40135	DNA/MuDR	LIMPET1	101.276	3.90911	3.9253e-14
AT2TE11010	LTR/Gypsy	ATHILA	88.1456	4.23439	3.94e-14
AT5TE18885	DNA/MuDR	VANDAL12	113.971	4.15239	4.11543e-14
AT4TE20075	DNA/MuDR	ARNOLD3	55.5811	4.33888	4.68309e-14
AT3TE53605	LTR/Gypsy	ATLANTYS2	52.8723	4.46493	5.2419e-14
AT2TE13870	RC/Helitron	HELITRON5	99.0641	4.21807	5.27681e-14
AT2TE12315	LTR/Gypsy	ATGP5	108.127	4.11422	5.8349e-14
AT3TE54780	LTR/Gypsy	ATLANTYS1	51.0473	4.39809	7.93072e-14
AT2TE23200	DNA/En-Spm	ATENSPM9	72.0941	4.26447	1.06148e-13
AT1TE51910	DNA/En-Spm	ATENSPM4	281.395	3.83036	1.17316e-13
AT3TE63205	DNA/MuDR	VANDAL8	58.5745	4.34231	1.18001e-13
AT2TE23205	DNA/En-Spm	ATENSPM6	75.9036	4.27561	1.21963e-13
AT1TE47765	LTR/Gypsy	ATHILA2	73.9445	4.23046	1.22978e-13
AT1TE57220	LTR/Gypsy	ATLANTYS1	54.8898	4.34767	1.24909e-13
AT5TE36620	LINE/L1	ATLINE1_6	119.636	4.31886	1.28921e-13
AT5TE50260	LTR/Copia	ATCOPIA18A	126.801	3.83334	1.29978e-13
AT1TE47035	LTR/Gypsy	ATHILA4C	255.386	3.78809	1.58877e-13
AT4TE15835	LTR/Gypsy	ATGP10	984.336	4.52445	1.6056e-13
AT4TE12615	DNA/MuDR	VANDAL2	93.3479	4.09363	1.70007e-13
AT2TE17555	LTR/Gypsy	ATHILA3	77.0575	4.22044	1.91609e-13
AT5TE47170	DNA/En-Spm	ATENSPM6	86.5885	4.20081	2.38926e-13
AT5TE62545	LINE/L1	ATLINE1_1	72.6131	4.19434	3.52217e-13
AT4TE17100	LTR/Copia	ATCOPIA41	85.6783	4.30122	4.9458e-13
AT5TE37985	LTR/Copia	ATCOPIA70	105.033	4.05417	5.47033e-13
AT2TE20160	DNA/MuDR	VANDAL1	49.3741	4.29786	5.51529e-13
AT2TE09500	LTR/Gypsy	ATGP3	129.917	3.6904	5.75695e-13
AT2TE05675	LINE/L1	ATLINE2	76.8722	4.19498	6.29404e-13
AT4TE15970	LTR/Gypsy	ATHILA3	169.161	3.90282	6.79743e-13
AT3TE63165	LTR/Copia	ATCOPIA16	201.07	3.98031	8.20139e-13
AT4TE15295	LTR/Gypsy	ATHILA2	82.5115	4.11762	8.67893e-13
AT3TE76405	RC/Helitron	ATREP12	59.7363	4.04715	9.27025e-13
AT4TE19655	LTR/Gypsy	ATGP7	176.977	3.33993	1.06176e-12
AT2TE20580	LTR/Gypsy	ATHILA4A	71.9087	4.13085	1.0995e-12
AT2TE23670	LTR/Gypsy	ATGP1	90.1312	3.70824	1.13029e-12
AT2TE38255	DNA/MuDR	LIMPET1	123.433	3.45418	1.17556e-12
AT1TE38530	DNA/MuDR	ARNOLD2	83.4795	4.02635	1.3515e-12
AT3TE63465	LINE/L1	ATLINE1_6	166.791	3.90268	1.57071e-12
AT5TE44190	DNA/En-Spm	ATENSPM9	84.5222	3.90748	1.65025e-12
AT5TE24050	DNA/MuDR	LIMPET1	136.722	3.30766	1.69015e-12
AT2TE09720	DNA/HAT	ATHAT2	70.8375	4.10338	1.698e-12
AT2TE28955	LINE/L1	ATLINE1_5	89.9969	3.81501	1.7714e-12
AT3TE50775	LTR/Gypsy	ATGP1	76.6857	3.94956	1.79706e-12
AT1TE51835	DNA/En-Spm	ATENSPM3	214.985	3.91199	1.81418e-12
AT5TE47755	DNA/Harbinger	ATIS112A	84.9631	3.92591	1.87277e-12
AT3TE56720	LTR/Gypsy	ATHILA	995.226	3.67028	1.96716e-12
AT5TE38355	DNA/En-Spm	ATENSPM7	100.641	4.00432	2.53098e-12
AT1TE50985	LTR/Gypsy	ATGP10	48.4318	4.24915	2.61016e-12
AT5TE38350	DNA/En-Spm	ATENSPM3	101.675	3.98665	2.79765e-12
AT2TE02465	DNA/MuDR	ARNOLD1	88.7781	4.03954	2.80685e-12
AT1TE45380	DNA/En-Spm	ATENSPM7	2491.72	4.37424	2.87331e-12
AT4TE15705	DNA/HAT	ATHAT7	149.503	3.99791	3.11128e-12
AT4TE27185	DNA/MuDR	ATDNAI26T9	110.358	3.80278	3.13278e-12
AT4TE13515	Unassigned	Unassigned	83.5401	4.03292	3.17254e-12
AT2TE19480	LTR/Gypsy	ATHILA	89.353	4.11254	3.29151e-12
AT4TE54750	DNA/Harbinger	HARBINGER	592.455	3.42976	3.37377e-12
AT4TE18765	LTR/Gypsy	ATHILA3	149.551	3.75723	4.53661e-12
AT2TE26685	LTR/Gypsy	ATHILA4A	77.856	4.07176	5.34322e-12
AT3TE59025	LTR/Gypsy	ATHILA0_I	63.5269	4.09597	5.61076e-12
AT2TE13750	DNA/MuDR	VANDAL3	76.9002	4.06119	5.69461e-12
AT3TE47770	DNA/En-Spm	ATENSPM5	79.0622	4.02373	5.82435e-12
AT3TE59615	LTR/Gypsy	ATHILA2	79.7219	4.02599	6.17243e-12
AT3TE33960	DNA/MuDR	ATDNAI26T9	112.99	3.78371	6.69671e-12
AT2TE17560	LTR/Gypsy	ATHILA8B	66.0546	4.08109	6.80771e-12
AT2TE11765	LTR/Gypsy	ATHILA2	86.4907	3.99013	7.46132e-12
AT3TE51895	LTR/Copia	ROMANIAT5	45.1437	4.14444	1.0276e-11
AT1TE37220	DNA/MuDR	VANDAL7	66.8396	4.03024	1.0304e-11
AT1TE51215	LTR/Gypsy	ATHILA	212.307	3.82202	1.04139e-11
AT3TE40130	DNA/MuDR	VANDAL5A	126.062	3.1062	1.0784e-11
AT5TE36805	LINE/L1	ATLINE2	141.864	3.93051	1.10137e-11
AT5TE41775	DNA/En-Spm	ATENSPM10	63.6581	4.05495	1.10159e-11
AT4TE18075	LTR/Gypsy	ATHILA	172.202	3.82585	1.16037e-11
AT5TE54515	DNA/MuDR	ATMU11	61.8597	4.08486	1.16616e-11
AT2TE20440	LTR/Gypsy	ATHILA6A	45.7708	4.23876	1.23852e-11
AT4TE25100	LTR/Copia	ATCOPIA69	552.04	3.5486	1.26651e-11
AT3TE45980	LTR/Gypsy	ATGP1	126.366	3.31579	1.2738e-11
AT4TE10925	DNA/Harbinger	HARBINGER	60.5957	4.13316	1.43636e-11
AT3TE47595	LTR/Gypsy	ATGP2	77.7159	3.87329	1.56254e-11
AT4TE13560	LTR/Gypsy	ATGP2N	65.1199	4.02769	1.77119e-11
AT5TE36845	LINE/L1	ATLINE1_6	44.9034	4.11753	1.83683e-11
AT1TE50870	LTR/Gypsy	ATHILA6A	84.4039	3.95255	1.85924e-11
AT3TE49720	LTR/Gypsy	ATGP8	157.893	3.74983	1.92384e-11
AT3TE61645	LTR/Gypsy	ATHILA	394.993	3.52295	2.46217e-11
AT2TE21730	LTR/Gypsy	ATHILA3	166.043	3.80201	2.49641e-11
AT5TE44230	LTR/Gypsy	ATHILA2	67.6522	3.98804	2.74168e-11
AT2TE16850	LTR/Gypsy	ATHILA5	75.6753	3.94863	3.08958e-11
AT2TE16545	LTR/Gypsy	ATHILA	190.419	3.71204	3.18864e-11
AT1TE34580	LTR/Copia	ATCOPIA73	234.673	3.61056	3.22612e-11
AT3TE42960	LINE/L1	TA11	392.341	2.94309	3.43547e-11
AT3TE57275	DNA/En-Spm	ATENSPM10	590.234	3.60481	3.52841e-11
AT3TE60295	DNA/En-Spm	ATENSPM2	52.7032	4.06516	3.52841e-11
AT5TE48930	LTR/Copia	ATCOPIA24	154.96	3.66959	3.69098e-11
AT4TE10980	LINE/L1	TA11	82.4803	3.87676	3.87688e-11
AT1TE54100	DNA/Harbinger	ATIS112A	72.2352	3.7208	4.48859e-11
AT4TE15115	Unassigned	Unassigned	63.9701	3.98375	4.63161e-11
AT4TE15025	LTR/Gypsy	ATHILA0_I	144.275	3.88109	5.12318e-11
AT1TE51190	LTR/Gypsy	ATHILA	174.875	3.75915	5.85662e-11
AT3TE51760	DNA/MuDR	VANDAL17	67.1159	3.99036	5.90386e-11
AT2TE20735	LTR/Gypsy	ATLANTYS1	50.401	3.96077	6.06871e-11
AT4TE16845	DNA/En-Spm	ATENSPM9	66.5537	3.9388	7.60045e-11
AT2TE34910	DNA/Harbinger	HARBINGER	116.298	3.57288	7.97828e-11
AT4TE13555	LTR/Gypsy	ATLANTYS1	43.5259	4.09448	8.20655e-11
AT5TE86350	RC/Helitron	ATREP12	51.0339	3.84805	8.47928e-11
AT4TE14230	LTR/Gypsy	ATHILA5	96.7292	3.83073	8.92134e-11
AT3TE55425	LTR/Gypsy	ATHILA6A	152.344	3.74877	9.21813e-11
AT5TE44890	Unassigned	Unassigned	60.2905	3.92471	9.41988e-11
AT1TE70805	LINE/L1	ATLINE1_1	63.7351	3.94913	1.00999e-10
AT5TE43360	LTR/Gypsy	ATLANTYS2	45.2533	4.09559	1.06726e-10
AT4TE18500	LTR/Gypsy	ATLANTYS1	57.2835	3.91329	1.08629e-10
AT3TE56710	LTR/Gypsy	ATHILA6A	1363.44	3.71625	1.32907e-10
AT5TE24045	DNA/MuDR	VANDAL5A	132.53	2.87389	1.52025e-10
AT5TE46350	LTR/Gypsy	ATHILA3	216.206	3.64072	1.9002e-10
AT3TE57350	LTR/Gypsy	ATHILA6A	79.9129	3.8586	2.00604e-10
AT3TE55350	LTR/Gypsy	ATHILA2	73.5094	3.83439	2.08306e-10
AT4TE38400	LTR/Gypsy	ATGP9B	115.051	3.46586	2.20286e-10
AT3TE53495	LINE/L1	TA11	58.9583	3.88661	2.50265e-10
AT1TE45695	LTR/Gypsy	ATHILA3	137.835	3.72084	2.53689e-10
AT3TE57470	LTR/Gypsy	ATHILA6A	170.165	3.66317	2.57155e-10
AT2TE69490	RC/Helitron	ATREP12	42.7361	3.90024	2.81074e-10
AT3TE67540	LTR/Gypsy	ATGP3	70.5191	3.85804	3.10378e-10
AT3TE58575	LTR/Gypsy	ATLANTYS3	533.24	4.0488	3.44002e-10
AT2TE20920	LTR/Gypsy	ATHILA	62.8131	3.88669	3.47731e-10
AT1TE41345	LTR/Gypsy	ATLANTYS2	49.0204	3.99137	4.47644e-10
AT5TE46855	LTR/Gypsy	ATHILA8B	847.946	3.93113	4.82746e-10
AT3TE68090	LTR/Copia	ATCOPIA81	240.546	3.37362	4.88656e-10
AT4TE45190	DNA/MuDR	VANDAL8	52.0983	3.90361	4.88656e-10
AT3TE60190	LTR/Gypsy	ATHILA5	74.4225	3.79452	4.92669e-10
AT2TE10265	DNA/En-Spm	ATENSPM3	55.9842	3.88479	5.01629e-10
AT3TE54770	LTR/Gypsy	ATHILA2	61.2561	3.8436	5.42826e-10
AT1TE45965	LTR/Gypsy	ATHILA8B	152.334	3.65206	6.25902e-10
AT2TE16870	LTR/Gypsy	ATHILA6A	65.5633	3.79209	7.20136e-10
AT4TE38410	LTR/Gypsy	ATGP9B	69.6606	3.56524	8.53111e-10
AT5TE36725	RC/Helitron	ATREP10B	53.6791	3.8807	9.23751e-10
AT5TE39420	DNA/MuDR	ARNOLD3	42.3904	3.98893	9.78201e-10
AT4TE14005	LTR/Gypsy	ATHILA3	140.045	3.62906	1.03954e-09
AT2TE16190	LTR/Gypsy	ATHILA2	153.066	3.5475	1.24136e-09
AT3TE59970	DNA/MuDR	ATDNAI27T9B	57.4798	3.81668	1.26872e-09
AT5TE47895	RC/Helitron	HELITRONY2	39.3285	3.98788	1.49159e-09
AT4TE17505	LTR/Gypsy	ATHILA	72.0851	3.90737	1.57646e-09
AT2TE26275	LINE/L1	ATLINE1_6	41.4237	3.94691	1.74578e-09
AT2TE13345	DNA/Pogo	ATHPOGON1	53.8351	3.83424	1.75255e-09
AT1TE54805	LTR/Gypsy	ATLANTYS1	158.743	2.68178	1.94182e-09
AT3TE56640	LTR/Gypsy	ATHILA	1654.5	3.64628	1.94437e-09
AT4TE16505	DNA/HAT	ATHAT7	52.8354	3.79026	2.07811e-09
AT5TE48725	DNA/Harbinger	ATIS112A	172.682	2.97289	2.52128e-09
AT3TE57100	LTR/Gypsy	ATGP10	80.8517	3.81373	2.72966e-09
AT1TE44720	LTR/Gypsy	ATGP1	85.6744	3.29341	2.87163e-09
AT5TE43800	LTR/Copia	ATCOPIA8A	98.8985	3.61592	3.0869e-09
AT2TE06040	DNA/En-Spm	ATENSPM7	267.009	3.40877	3.1594e-09
AT4TE08850	LTR/Gypsy	ATHILA2	46.7874	3.82517	3.2429e-09
AT2TE12660	LTR/Copia	ATCOPIA13	37.4633	3.93303	3.64029e-09
AT5TE39085	LTR/Gypsy	ATHILA3	78.4427	3.65402	4.00629e-09
AT4TE13295	LTR/Gypsy	ATHILA2	61.7603	3.75188	4.11256e-09
AT1TE38210	LTR/Copia	ATCOPIA31	107.668	3.25384	4.13675e-09
AT2TE18440	LTR/Gypsy	ATHILA2	71.5	3.71511	4.26178e-09
AT1TE46405	LTR/Copia	ATCOPIA66	962.702	3.22263	4.48557e-09
AT5TE32885	RathE1_cons	RathE1_cons	27.885	4.06661	4.5918e-09
AT3TE50375	DNA/MuDR	VANDAL3	33.7304	3.89517	4.71118e-09
AT4TE09130	LINE/L1	ATLINEIII	53.3651	3.74683	5.02314e-09
AT4TE18485	LTR/Gypsy	ATHILA3	499.46	3.36808	5.845e-09
AT5TE34960	DNA	ATDNA12T3_2	55.7965	3.68338	5.94739e-09
AT2TE07145	LTR/Copia	ATCOPIA95	1106.66	3.40951	6.62177e-09
AT2TE21760	LTR/Gypsy	ATLANTYS1	37.7108	3.80302	6.93457e-09
AT3TE58580	LTR/Gypsy	ATLANTYS1	845.347	3.88664	7.11441e-09
AT5TE42865	LTR/Gypsy	ATHILA4C	111.461	3.50507	7.21878e-09
AT3TE61610	LTR/Gypsy	ATHILA	54.697	3.66935	7.41061e-09
AT5TE31020	LINE/L1	ATLINE1_6	96.6514	3.58219	7.95945e-09
AT2TE25540	LTR/Gypsy	ATGP1	184.061	3.05593	8.51928e-09
AT2TE17640	LTR/Gypsy	ATHILA6A	91.6367	3.58457	8.57673e-09
AT3TE51930	LTR/Gypsy	ATGP1	187.481	3.19478	1.0753e-08
AT3TE49420	DNA/En-Spm	ATENSPM9	122.286	3.59263	1.15253e-08
AT2TE22635	LINE/L1	TA11	297.865	3.32992	1.17646e-08
AT5TE43895	LTR/Gypsy	ATHILA	259.768	3.39426	1.25842e-08
AT5TE36730	RC/Helitron	ATREP3	49.1573	3.71929	1.29157e-08
AT5TE46310	LTR/Gypsy	ATHILA0_I	93.9459	3.55291	1.44568e-08
AT3TE51590	LTR/Gypsy	ATHILA3	132.533	3.47904	1.51174e-08
AT3TE37570	RathE1_cons	RathE1_cons	28.5227	3.91711	1.63091e-08
AT4TE20085	DNA/MuDR	ARNOLD2	32.8061	3.81448	1.88606e-08
AT5TE43265	LTR/Gypsy	ATHILA6B	67.9579	3.61582	1.88819e-08
AT3TE48140	DNA/En-Spm	ATENSPM10	65.6318	3.56871	1.95109e-08
AT3TE66875	LINE/L1	ATLINE2	53.2899	3.60939	2.06587e-08
AT3TE60610	DNA/MuDR	VANDAL2	41.3795	3.69401	2.08952e-08
AT3TE50660	LTR/Gypsy	ATHILA6B	80.9586	3.58999	2.51935e-08
AT3TE65100	DNA/MuDR	ARNOLD1	40.9388	3.71925	2.56726e-08
AT5TE54505	DNA/MuDR	ATMU1	41.3768	3.71156	2.78985e-08
AT3TE61295	LTR/Gypsy	ATGP2	59.5188	3.55934	2.83166e-08
AT4TE20570	DNA/En-Spm	ATENSPM3	94.0085	3.50999	2.98501e-08
AT5TE26810	DNA/MuDR	ATDNAI27T9A	48.9013	3.72641	3.34492e-08
AT5TE46155	DNA/MuDR	VANDAL20	94.1691	3.72082	3.42205e-08
AT5TE46045	LTR/Gypsy	ATHILA	305.649	3.44977	3.52059e-08
AT2TE18965	LINE/L1	ATLINE1_4	45.3659	3.65374	3.70446e-08
AT1TE20090	DNA/MuDR	ATREP16	43.5934	3.62333	4.17841e-08
AT2TE77005	LTR/Gypsy	ATGP9B	116.693	3.22594	4.75591e-08
AT1TE45510	DNA/En-Spm	ATENSPM6	238.681	3.02884	4.86417e-08
AT1TE54545	LINE?	TSCL	40.7239	3.69025	5.40912e-08
AT4TE18730	LTR/Gypsy	ATHILA5	73.4633	3.47591	5.51774e-08
AT2TE11315	LINE/L1	ATLINE1_6	186.396	3.35378	5.5203e-08
AT4TE13825	LTR/Gypsy	ATHILA	138.843	3.42437	6.12129e-08
AT5TE44310	LTR/Gypsy	ATGP1	57.4337	3.50213	6.47646e-08
AT3TE59455	DNA/MuDR	VANDAL3	70.5573	3.61633	6.67354e-08
AT3TE50970	LTR/Gypsy	ATHILA2	54.0689	3.56438	7.2283e-08
AT3TE51640	LTR/Gypsy	ATHILA8B	36.7195	3.67939	7.50546e-08
AT3TE66890	LTR/Gypsy	ATGP2N	69.4918	3.25419	8.13998e-08
AT5TE42930	LTR/Gypsy	ATHILA6A	84.5859	3.4476	9.51665e-08
AT1TE46065	LTR/Gypsy	ATGP3	112.304	3.38011	1.09832e-07
AT1TE57045	DNA/HAT	TAG2	58.4758	3.52996	1.14844e-07
AT1TE45865	DNA/En-Spm	ATENSPM5	58.8583	3.51194	1.16896e-07
AT2TE18980	LTR/Gypsy	ATGP1	116.363	2.95201	1.22749e-07
AT4TE13985	LTR/Gypsy	ATGP10	54.3672	3.52062	1.24377e-07
AT2TE18005	LTR/Gypsy	ATHILA	108.807	3.33481	1.32316e-07
AT2TE38910	LTR/Copia	ATCOPIA76	236.863	3.26614	1.38928e-07
AT5TE18895	DNA/MuDR	ATMU11	80.8494	3.44959	1.58005e-07
AT3TE57160	LTR/Gypsy	ATGP10	62.2075	3.5731	1.6398e-07
AT5TE43535	LTR/Gypsy	ATHILA8A	30.3249	3.71244	1.75879e-07
AT5TE30935	LTR/Gypsy	ATHILA	71.6764	3.44803	1.85299e-07
AT3TE50575	LTR/Gypsy	ATHILA3	75.5725	3.40433	1.97741e-07
AT2TE28755	DNA/MuDR	VANDAL1	23.3985	3.76525	2.61491e-07
AT2TE13385	LTR/Copia	ATCOPIA20	140.764	3.18791	2.72026e-07
AT5TE42255	DNA/En-Spm	ATENSPM6	396.096	3.12581	2.79617e-07
AT2TE18840	RC/Helitron	HELITRON4	44.9521	3.46944	2.82022e-07
AT2TE69630	DNA/MuDR	ATMU7	36.6427	3.71203	3.2517e-07
AT3TE51150	DNA/En-Spm	ATENSPM11	1758.92	3.25641	3.27004e-07
AT1TE43225	LTR/Copia	ROMANIAT5	35.9324	3.62046	3.35227e-07
AT1TE52130	LTR/Gypsy	ATHILA2	44.1319	3.50132	3.50723e-07
AT2TE12225	DNA/MuDR	VANDAL9	40.7347	3.52549	3.58241e-07
AT5TE54520	DNA/MuDR	ATMU3	40.4648	3.5539	4.07013e-07
AT1TE53915	LTR/Gypsy	ATGP1	98.1131	3.22224	4.21584e-07
AT2TE20605	LTR/Gypsy	ATHILA4C	50.7238	3.4265	4.23897e-07
AT1TE54650	LTR/Gypsy	ATHILA5	36.3275	3.55199	4.23925e-07
AT2TE28290	DNA/HAT	ATHAT1	45.4282	3.4639	4.54534e-07
AT1TE46275	DNA/HAT	ATHAT1	69.1901	3.38405	4.88751e-07
AT5TE56030	LTR/Gypsy	ATGP1	128.744	3.07372	5.23735e-07
AT2TE16960	DNA/En-Spm	ATENSPM7	64.2737	3.34424	5.93979e-07
AT1TE20315	DNA/HAT	TAG2	161.036	2.37268	6.16844e-07
AT3TE65015	LTR/Copia	META1	44.0134	3.28158	7.34432e-07
AT4TE18865	DNA/MuDR	VANDAL3	26.2946	3.68854	7.34432e-07
AT5TE42145	LTR/Gypsy	ATHILA	213.52	3.22393	7.50772e-07
AT3TE54845	DNA/MuDR	ARNOLD2	41.0017	3.48255	7.621e-07
AT2TE29460	LINE/L1	TA11	159.862	3.15332	9.57809e-07
AT2TE19970	LTR/Gypsy	ATLANTYS1	33.685	3.52736	9.98904e-07
AT2TE10735	RC/Helitron	HELITRONY1A	199.204	2.36281	1.12904e-06
AT2TE10740	RC/Helitron	HELITRONY1A	199.204	2.36281	1.12904e-06
AT3TE53130	DNA/En-Spm	ATENSPM6	47.1884	3.4181	1.16883e-06
AT4TE10335	LTR/Copia	ATCOPIA58	184.367	3.16128	1.41637e-06
AT1TE53970	LTR/Copia	ATCOPIA69	129.995	3.20065	1.56293e-06
AT4TE10255	Unassigned	Unassigned	52.8121	3.33704	1.77862e-06
AT4TE08355	LTR/Gypsy	ATGP1	63.7295	3.1552	1.83425e-06
AT3TE64215	RC/Helitron	ATREP5	27.9513	3.49918	2.08779e-06
AT1TE51570	LTR/Gypsy	ATHILA6A	406.901	3.40186	2.16138e-06
AT1TE51070	LTR/Gypsy	ATHILA6A	65.4947	3.27368	2.25056e-06
AT5TE38945	RC/Helitron	HELITRONY2	33.6611	3.42565	2.27416e-06
AT3TE59480	LTR/Gypsy	ATGP2	121.041	3.22989	2.33415e-06
AT4TE18775	LTR/Gypsy	ATHILA6A	442.314	3.0384	2.38209e-06
AT2TE20420	LTR/Gypsy	ATHILA3	54.2828	3.18329	2.45689e-06
AT2TE28565	DNA/MuDR	VANDAL1	32.5851	3.32253	2.60934e-06
AT2TE23940	LTR/Gypsy	ATGP2	46.841	3.27745	2.63928e-06
AT5TE45080	LTR/Gypsy	ATHILA0_I	49.5579	3.3159	2.83005e-06
AT3TE47780	DNA/En-Spm	ATENSPM2	41.6438	3.33837	3.20598e-06
AT3TE47560	LTR/Gypsy	ATGP2N	38.1192	3.38435	3.20743e-06
AT1TE70190	LTR/Copia	ATCOPIA26	33.0406	3.40121	3.45447e-06
AT2TE19440	LTR/Gypsy	ATHILA0_I	37.5359	3.37617	3.66664e-06
AT5TE43200	LTR/Gypsy	ATGP2N	47.3613	3.19815	3.72299e-06
AT3TE54820	DNA/MuDR	ARNOLD2	54.1998	3.34557	3.78603e-06
AT2TE16880	LTR/Gypsy	ATHILA2	44.0667	3.32697	3.8914e-06
AT1TE44825	LINE/L1	ATLINE1_4	33.0515	3.42538	4.03102e-06
AT5TE46110	LTR/Gypsy	ATHILA	64.9349	3.26578	4.13327e-06
AT5TE46865	DNA/HAT	ATHAT1	91.9947	2.8233	4.18381e-06
AT5TE43300	LTR/Gypsy	ATHILA7	18.9464	3.56587	4.27229e-06
AT4TE18635	LTR/Gypsy	ATHILA0_I	84.2048	3.19456	4.27808e-06
AT2TE20915	LTR/Gypsy	ATHILA0_I	51.9403	3.18628	4.32897e-06
AT4TE24480	LTR/Copia	ATCOPIA26	31.9926	3.40058	4.32897e-06
AT3TE51295	LTR/Gypsy	ATHILA6A	39.3826	3.31718	4.9041e-06
AT4TE16475	LTR/Gypsy	ATHILA4A	38.0483	3.34157	4.98762e-06
AT5TE48550	LINE/L1	ATLINE1_2	79.8469	3.25762	5.28605e-06
AT2TE21755	LTR/Gypsy	ATHILA0_I	64.329	3.17711	5.36661e-06
AT4TE23190	DNA/MuDR	ATMU3	45.7826	3.33565	5.44933e-06
AT2TE15590	LTR/Gypsy	ATHILA6A	150.921	3.08298	5.50302e-06
AT2TE09205	DNA/MuDR	VANDAL1	26.6838	3.38956	5.5084e-06
AT2TE18025	LINE/L1	ATLINE1_6	45.0105	3.3012	5.51149e-06
AT1TE51235	LTR/Gypsy	ATHILA	50.9351	3.22041	5.68238e-06
AT3TE59880	DNA/MuDR	ATMU10	38.7084	3.33587	5.76714e-06
AT2TE23210	DNA/En-Spm	ATENSPM9	42.4635	3.32739	5.86607e-06
AT2TE20105	LTR/Gypsy	ATHILA3	83.5509	3.07363	6.41245e-06
AT5TE49915	LTR/Copia	ATCOPIA56	3117.93	2.79477	6.43101e-06
AT5TE93055	DNA/HAT	ATHAT1	112.113	2.78887	6.8278e-06
AT3TE18040	RC/Helitron	HELITRON1	80.175	2.74996	6.90382e-06
AT1TE52855	LTR/Gypsy	ATHILA4B_LTR	51.6775	3.39983	7.21702e-06
AT3TE58625	LTR/Gypsy	ATHILA5	53.305	3.22018	7.35229e-06
AT4TE18360	LTR/Gypsy	ATHILA4	45.3069	3.24039	8.038e-06
AT2TE78940	RC/Helitron	ATREP4	34.6381	3.27766	8.07666e-06
AT2TE22185	LTR/Gypsy	ATLANTYS2	30.2799	3.39501	8.1419e-06
AT5TE55925	DNA/MuDR	ATMU6	41.6325	3.25997	8.34412e-06
AT2TE26785	LTR/Gypsy	ATLANTYS1	38.9773	3.25423	9.73979e-06
AT1TE46140	LTR/Gypsy	ATHILA	169.505	2.95871	9.9087e-06
AT4TE18785	LTR/Gypsy	ATHILA4A	275.399	2.9689	1.02615e-05
AT2TE19425	LTR/Gypsy	ATHILA6A	39.0724	3.25277	1.12017e-05
AT4TE23200	DNA/MuDR	ATMU11	39.4696	3.25088	1.21487e-05
AT5TE47525	DNA/En-Spm	ATENSPM6	169.37	3.01298	1.33727e-05
AT3TE61160	DNA/En-Spm	ATENSPM9	344.184	3.3303	1.43721e-05
AT1TE45620	DNA/MuDR	ATDNAI27T9B	39.3915	3.23572	1.4632e-05
AT2TE21025	LTR/Gypsy	ATHILA	102.283	3.06029	1.50362e-05
AT3TE52705	LINE/L1	ATLINE1_6	30.2458	3.30721	1.50509e-05
AT5TE34985	DNA/MuDR	ARNOLD2	40.3824	3.23677	1.55085e-05
AT5TE39590	DNA/HAT	ATHAT2	100.348	3.07589	1.5681e-05
AT2TE16475	LTR/Gypsy	ATHILA2	107.954	3.05123	1.66215e-05
AT4TE18590	LTR/Gypsy	ATHILA5	39.7767	3.22102	1.77999e-05
AT2TE17115	LTR/Gypsy	ATHILA6A	45.9028	3.18443	1.78302e-05
AT2TE20905	LTR/Gypsy	ATHILA3	119.942	2.52679	1.81142e-05
AT5TE46850	LTR/Gypsy	ATGP10	129.561	3.05732	2.00949e-05
AT2TE16665	LTR/Gypsy	ATHILA3	86.1577	3.05846	2.20567e-05
AT1TE47125	LTR/Gypsy	ATHILA3	60.9646	3.10522	2.25136e-05
AT3TE45385	LINE/L1	ATLINE1_6	207.823	2.01298	2.25136e-05
AT4TE15525	LTR/Gypsy	ATGP10	54.8784	3.20478	2.34229e-05
AT2TE16800	LTR/Gypsy	ATLANTYS3	48.5469	3.09977	2.3887e-05
AT1TE22850	LTR/Gypsy	ATLANTYS2	173.724	2.09868	2.45761e-05
AT4TE14245	LTR/Gypsy	ATHILA0_I	81.0161	3.03818	2.46396e-05
AT2TE21500	LTR/Gypsy	ATHILA6A	128.164	3.03858	2.46788e-05
AT5TE50490	LINE/L1	ATLINE1_5	85.0455	3.04133	2.57591e-05
AT1TE44875	DNA/MuDR	ATDNAI26T9	65.7165	3.08216	2.58209e-05
AT4TE16480	LTR/Gypsy	ATHILA4D_LTR	38.6764	3.1767	2.73298e-05
AT1TE47340	LTR/Gypsy	ATHILA3	69.5705	3.03775	2.84532e-05
AT5TE00480	Unassigned	Unassigned	635.439	3.19667	3.15732e-05
AT3TE59160	LTR/Gypsy	ATHILA2	53.0889	3.08512	3.22571e-05
AT2TE17795	LTR/Gypsy	ATHILA2	48.2536	3.23791	3.27982e-05
AT5TE86410	DNA/En-Spm	ATENSPM9	112.805	2.67497	3.33237e-05
AT4TE06990	RC/Helitron	ATREP10B	26.3028	3.21348	3.35659e-05
AT5TE36735	RC/Helitron	ATREP6	34.7177	3.20577	3.40616e-05
AT3TE52775	LTR/Gypsy	ATLANTYS2	25.3798	3.25677	3.4215e-05
AT1TE55920	LTR/Gypsy	ATHILA8B	91.9606	2.5708	3.50497e-05
AT1TE51945	DNA/En-Spm	ATENSPM4	119.081	2.96533	3.80924e-05
AT1TE34315	DNA/En-Spm	ATENSPM10	106.38	2.95201	4.10255e-05
AT5TE37380	LTR/Gypsy	ATGP2	73.4582	2.92091	4.36719e-05
AT2TE20230	LINE/L1	TA11	42.4578	3.10048	4.80408e-05
AT1TE58100	LTR/Gypsy	ATLANTYS3	29.3051	3.18418	5.15275e-05
AT5TE29680	DNA/MuDR	ATDNA1T9A	41.8009	3.04228	5.9574e-05
AT5TE40100	LTR/Gypsy	ATLANTYS2	36.9274	3.15522	6.12101e-05
AT5TE35260	DNA/MuDR	BRODYAGA2	29.2343	3.1553	6.69286e-05
AT4TE17150	LTR/Gypsy	ATLANTYS1	31.3602	3.14876	6.70606e-05
AT2TE25365	DNA/MuDR	ATMU1	32.0687	3.12959	6.87796e-05
AT3TE51630	LTR/Gypsy	ATHILA7	178.406	2.87826	7.17559e-05
AT4TE16540	LTR/Gypsy	ATGP7	42.257	3.06967	7.36572e-05
AT5TE37400	LTR/Gypsy	ATGP2	70.9022	2.90293	7.36572e-05
AT3TE44695	RC/Helitron	ATREP12	29.1314	3.06044	7.40422e-05
AT5TE56645	LTR/Copia	ATCOPIA83	41.1444	3.13005	8.88829e-05
AT1TE47735	LTR/Gypsy	ATHILA2	43.6686	3.05236	9.00579e-05
AT4TE13495	LTR/Copia	ROMANIAT5	30.2279	3.1238	9.25449e-05
AT1TE51775	DNA/HAT	ATHAT1	80.213	2.61136	0.000103601
AT2TE23845	LTR/Copia	ATCOPIA49	962.238	2.71093	0.000104171
AT4TE17105	LTR/Copia	ATCOPIA41	31.0755	3.12913	0.000104171
AT1TE18370	DNA/HAT	TAG2	119.989	2.25494	0.000105481
AT5TE37670	LTR/Gypsy	ATGP7	59.3413	2.95166	0.000113267
AT1TE41490	DNA/MuDR	ATDNAI27T9A	26.7586	3.12277	0.000120617
AT5TE43235	LTR/Gypsy	ATHILA	34.4093	3.07065	0.00012594
AT4TE25635	DNA/MuDR	VANDAL8	27.8937	3.08271	0.000126147
AT3TE54450	LTR/Gypsy	ATLANTYS3	26.2817	3.11875	0.000132196
AT2TE26450	DNA/Harbinger	ATIS112A	30.8974	3.06107	0.000134203
AT5TE44185	LTR/Gypsy	ATHILA4C	366.923	2.72731	0.000147359
AT5TE50115	RC/Helitron	HELITRONY3	60.3981	2.90257	0.000158351
AT2TE40345	LTR/Gypsy	ATGP5	33.4911	3.02093	0.000165424
AT2TE19515	LTR/Gypsy	ATHILA	44.5309	3.01882	0.000168612
AT1TE47475	LTR/Gypsy	ATHILA3	45.605	2.95973	0.000181635
AT1TE35870	DNA/HAT	ATHAT1	26.8518	3.07707	0.000196063
AT4TE09800	LTR/Copia	ATCOPIA59	32.0371	3.02198	0.000197483
AT1TE54000	LTR/Gypsy	ATGP3	74.7643	2.92153	0.000202997
AT5TE74305	DNA/MuDR	AT9TSD1	27.7832	3.05369	0.000207653
AT3TE45325	RC/Helitron	ATREP1	27.2329	3.04552	0.000212985
AT2TE25350	DNA/MuDR	ATMU3	29.7993	3.05557	0.000218725
AT3TE54985	DNA/En-Spm	ATENSPM7	694.94	2.98297	0.000225933
AT5TE40110	LTR/Gypsy	ATGP10	40.2696	2.96823	0.000228387
AT5TE38345	DNA/En-Spm	ATENSPM3	66.9698	2.89857	0.000233498
AT2TE19985	LTR/Gypsy	TAT1_ATH	27.3276	3.05481	0.000239041
AT2TE20600	LTR/Gypsy	ATHILA4A	36.2267	2.97601	0.000259054
AT5TE46015	LTR/Gypsy	ATHILA3	68.1712	2.92328	0.000266624
AT5TE41800	DNA/En-Spm	ATENSPM9	47.4389	2.97293	0.000267453
AT3TE53615	LTR/Gypsy	ATHILA4C	39.6015	2.97093	0.000283525
AT5TE56665	LTR/Copia	ATCOPIA83	38.9066	3.02889	0.000293909
AT3TE52550	LTR/Gypsy	ATHILA4A	31.0598	2.9992	0.000326433
AT2TE21420	LTR/Gypsy	ATHILA2	49.4529	2.90606	0.000332945
AT1TE46635	LTR/Gypsy	ATLANTYS1	29.4047	2.97543	0.000349198
AT2TE12505	LTR/Gypsy	ATHILA	217.279	2.49513	0.000349828
AT2TE22495	LTR/Gypsy	ATLANTYS1	42.6659	2.95474	0.000367445
AT2TE09645	DNA/En-Spm	ATENSPM7	34.8953	2.98755	0.000375237
AT3TE56730	LTR/Gypsy	ATHILA6A	383.956	2.67198	0.000399519
AT1TE49330	LTR/Gypsy	ATHILA6A	128.688	2.78634	0.00040277
AT1TE47255	LTR/Gypsy	ATHILA3	46.5442	2.85243	0.000427339
AT2TE40350	LTR/Gypsy	ATGP6	31.8385	2.93616	0.000437116
AT3TE49545	LTR/Gypsy	ATHILA6B	33.8523	2.93895	0.00045189
AT2TE28260	LTR/Copia	ATCOPIA38	72.0618	2.74717	0.000484223
AT4TE08945	LTR/Gypsy	ATHILA2	46.5578	2.90165	0.000484501
AT3TE49190	DNA/Harbinger	ATIS112A	21.2443	3.04044	0.000500316
AT5TE37960	DNA/En-Spm	ATENSPM5	31.8495	2.93322	0.000547413
AT5TE36835	LTR/Gypsy	ATGP2N	26.7856	3.02645	0.000552848
AT3TE57175	LTR/Gypsy	ATHILA2	58.3046	2.85105	0.000561665
AT3TE58655	RC/Helitron	HELITRON5	33.5052	2.98032	0.000562695
AT4TE17145	LTR/Gypsy	TAT1_ATH	23.0535	2.99079	0.000591443
AT5TE37370	LTR/Gypsy	ATGP2	72.0686	2.7101	0.000605398
AT2TE23665	LTR/Gypsy	ATGP1	78.0852	2.69472	0.000609966
AT3TE44955	DNA/MuDR	VANDAL8	37.7584	2.86323	0.000642124
AT3TE55020	LTR/Gypsy	ATHILA2	80.1893	2.78404	0.000649579
AT5TE41615	LTR/Gypsy	ATLANTYS2	19.3543	3.0239	0.000649579
AT5TE46100	LTR/Gypsy	ATHILA3	502.715	2.91523	0.000673906
AT3TE56045	LTR/Gypsy	ATGP7	79.3858	2.76205	0.00068545
AT3TE41640	DNA/MuDR	ATDNAI26T9	31.3423	2.94068	0.000697821
AT5TE42435	LTR/Gypsy	ATHILA6A	28.5792	2.92965	0.000733949
AT5TE40505	LTR/Gypsy	ATHILA6A	39.4578	2.92977	0.000760806
AT4TE21910	LTR/Gypsy	ATGP1	38.9681	2.86054	0.000777751
AT3TE43910	LTR/Gypsy	ATHILA8A	37.6238	2.80864	0.00079102
AT4TE16050	LTR/Gypsy	ATHILA5	31.5357	2.89159	0.000799736
AT3TE56630	LTR/Gypsy	ATHILA	1050.14	2.78494	0.000833872
AT2TE26875	DNA/HAT	ATHAT1	37.1744	2.85515	0.000869339
AT5TE42935	LTR/Gypsy	ATHILA2	59.5889	2.78686	0.00087762
AT1TE78470	Unassigned	Unassigned	63.0639	2.5566	0.000901495
AT3TE66175	LTR/Gypsy	ATGP1	48.5002	2.70849	0.000927551
AT5TE36530	RC/Helitron	HELITRONY1C	39.2984	2.68752	0.000932005
AT1TE46630	Unassigned	Unassigned	17.9945	3.00678	0.000942312
AT1TE47195	LTR/Gypsy	ATHILA7A	67.0493	2.82589	0.000946641
AT1TE47415	LTR/Gypsy	ATHILA7A	67.0493	2.82589	0.000946641
AT3TE48590	LTR/Copia	ATCOPIA16	186.306	2.68242	0.0010341
AT2TE16270	RC/Helitron	HELITRONY2	31.586	2.84219	0.00104096
AT3TE60185	LTR/Gypsy	ATHILA0_I	33.0776	2.85809	0.00104096
AT5TE47515	LTR/Gypsy	ATHILA0_I	43.1501	2.8241	0.00110282
AT3TE46670	LTR/Gypsy	ATGP1	86.038	2.49845	0.00110759
AT5TE47120	DNA/MuDR	VANDAL2	36.6276	2.85354	0.00113112
AT2TE20335	DNA/Harbinger	HARBINGER	26.6239	2.88289	0.00117514
AT4TE10700	LTR/Copia	ATCOPIA10	52.4756	2.75843	0.00119491
AT5TE36330	LTR/Copia	ATCOPIA9	103.108	2.70479	0.00120401
AT1TE52115	LTR/Gypsy	ATHILA2	29.7314	2.87391	0.00121047
AT5TE45075	LTR/Gypsy	ATGP10	51.7966	2.78602	0.00122167
AT2TE17155	LTR/Gypsy	ATHILA0_I	31.8107	2.84368	0.00122348
AT1TE48720	LTR/Gypsy	ATHILA6A	213.812	2.61596	0.00126746
AT2TE23425	DNA/MuDR	ATDNAI26T9	40.1234	2.71766	0.0013783
AT4TE08440	LTR/Gypsy	ATGP2	41.2116	2.69316	0.00140103
AT1TE46960	DNA/En-Spm	ATENSPM9	183.171	2.65081	0.00153801
AT1TE42400	LTR/Gypsy	ATGP3	95.9524	2.71583	0.00154398
AT5TE34435	RC/Helitron	ATREP15	24.8829	2.82063	0.00167653
AT2TE21470	LTR/Gypsy	ATHILA6A	89.7145	2.69803	0.00169585
AT3TE53490	LINE/L1	ATLINE1_5	28.9439	2.82643	0.00169901
AT1TE47050	LTR/Gypsy	ATHILA2	55.4589	2.69876	0.00171434
AT5TE45540	DNA/En-Spm	ATENSPM5	26.4306	2.85436	0.00172519
AT3TE58585	LTR/Gypsy	ATLANTYS2	66.866	2.79357	0.00181465
AT3TE54500	DNA/MuDR	ARNOLD3	21.6154	2.86275	0.00182396
AT5TE14165	LTR/Gypsy	ATGP3	161.5	2.5613	0.00189539
AT5TE47205	LTR/Copia	ATCOPIA95	22.228	2.89366	0.00192867
AT1TE49755	LTR/Gypsy	ATLANTYS2	26.2116	2.82968	0.00194863
AT5TE47150	LTR/Gypsy	ATHILA0_I	43.0296	2.76845	0.00194863
AT3TE57060	LTR/Gypsy	ATLANTYS1	49.1755	2.65613	0.00195038
AT3TE62020	LTR/Gypsy	ATHILA0_I	29.7478	2.80562	0.00204401
AT3TE51270	LINE/L1	ATLINE1_4	20.7364	2.86824	0.00213977
AT3TE66150	DNA/HAT	ATHAT1	25.528	2.839	0.00222497
AT2TE09615	DNA/En-Spm	ATENSPM9	24.3871	2.81139	0.00248652
AT1TE47300	LTR/Gypsy	ATGP10	51.43	2.72986	0.00258071
AT1TE47520	LTR/Gypsy	ATGP10	51.43	2.72986	0.00258071
AT4TE40115	DNA/En-Spm	ATENSPM6	37.6501	2.68565	0.0025891
AT2TE17870	LTR/Copia	ATCOPIA32B	217.979	2.50018	0.0026225
AT3TE50500	RC/Helitron	HELITRON2	18.7302	2.85465	0.00263177
AT4TE21505	DNA/Harbinger	ATIS112A	23.9677	2.81357	0.00264435
AT5TE50990	RC/Helitron	ATREP4	26.8141	2.80707	0.00268123
AT5TE42250	DNA/En-Spm	ATENSPM9	248.465	2.53541	0.00269007
AT4TE44400	DNA/HAT	ATHAT1	22.0328	2.81521	0.00270079
AT3TE50055	LTR/Gypsy	ATHILA7	47.7587	2.69913	0.00284561
AT5TE45210	DNA/En-Spm	ATENSPM5	25.8057	2.80836	0.00287371
AT3TE62245	LTR/Gypsy	ATGP1	54.0886	2.49682	0.00315942
AT4TE18505	DNA/En-Spm	ATENSPM3	21.7309	2.81179	0.00319118
AT2TE10385	RC/Helitron	HELITRONY2	26.8813	2.81243	0.00321327
AT2TE11815	DNA/MuDR	VANDAL1	22.6916	2.84405	0.00324879
AT4TE17460	LTR/Copia	ROMANIAT5	37.4602	2.75681	0.00345548
AT3TE48090	LTR/Gypsy	ATHILA2	39.8197	2.7267	0.00349094
AT2TE05440	DNA/MuDR	ARNOLD2	19.22	2.80015	0.00374143
AT2TE08385	LINE/L1	ATLINE1_4	17.9545	2.80351	0.00376343
AT1TE45560	LTR/Gypsy	ATGP1	80.8682	2.35133	0.00381457
AT3TE51135	LTR/Gypsy	ATHILA3	54.0504	2.60455	0.00405718
AT3TE55470	LTR/Gypsy	ATGP7	66.9941	2.60161	0.00418484
AT5TE43440	LTR/Gypsy	ATHILA6A	44.7088	2.65405	0.00434845
AT3TE45975	LTR/Gypsy	ATGP1	49.8396	2.57264	0.00485276
AT5TE39415	DNA/Harbinger	HARBINGER	30.251	2.69494	0.00499132
AT2TE20040	DNA/En-Spm	ATENSPM10	31.1416	2.72561	0.00536943
AT5TE40300	DNA/En-Spm	ATENSPM5	23.2025	2.72384	0.00544342
AT3TE59600	LTR/Gypsy	ATHILA2	25.8419	2.70841	0.00548842
AT2TE20595	LTR/Gypsy	ATHILA7	30.3604	2.67111	0.00559904
AT5TE42985	LTR/Gypsy	ATHILA6B	30.1459	2.68071	0.00559904
AT3TE61050	LTR/Gypsy	ATHILA3	58.0921	2.57943	0.00560973
AT5TE37385	LTR/Gypsy	ATHILA3	38.8136	2.62881	0.00578493
AT2TE15675	LTR/Gypsy	ATHILA3	31.2292	2.6752	0.00592645
AT3TE59095	LTR/Gypsy	ATHILA2	28.8863	2.69558	0.00598312
AT1TE51275	LTR/Gypsy	ATGP5	37.2522	2.64984	0.00603664
AT1TE42395	LTR/Gypsy	ATGP3	291.356	2.41727	0.00607924
AT2TE18830	LTR/Gypsy	ATLANTYS1	18.7833	2.72055	0.00645119
AT1TE47130	LTR/Gypsy	ATHILA0_I	163.971	2.48169	0.00660675
AT1TE47350	LTR/Gypsy	ATHILA0_I	163.971	2.48169	0.00660675
AT3TE51535	LTR/Gypsy	ATLANTYS1	18.4614	2.72721	0.00681562
AT5TE74190	DNA/MuDR	AT9TSD1	20.7642	2.70355	0.0069542
AT5TE47520	DNA/En-Spm	ATENSPM5	97.6853	2.52259	0.00711246
AT5TE48605	DNA/MuDR	VANDAL9	17.8512	2.73155	0.00713204
AT1TE51480	LTR/Gypsy	ATGP2N	25.4624	2.67093	0.00726094
AT2TE18875	DNA/MuDR	VANDAL20	66.4713	2.46679	0.00736749
AT5TE44370	LTR/Gypsy	ATHILA2	24.9675	2.6824	0.00740015
AT5TE46235	LTR/Gypsy	ATHILA8B	25.4494	2.67047	0.00746229
AT4TE22950	DNA/En-Spm	ATENSPM5	19.1451	2.71142	0.00752447
AT5TE44420	DNA/Harbinger	HARBINGER	41.3389	2.60814	0.00807289
AT5TE39560	LTR/Gypsy	ATGP10	12.5051	2.73329	0.00876644
AT3TE59040	DNA/MuDR	ARNOLDY2	35.4605	2.61289	0.00883477
AT1TE51175	LTR/Gypsy	ATLANTYS2	14.5453	2.71891	0.008983
AT2TE78210	LINE/L1	TA11	156.85	2.19741	0.00935056
AT3TE61060	LTR/Gypsy	ATHILA0_I	19.5951	2.66861	0.00967853
AT4TE18570	LTR/Gypsy	ATLANTYS1	24.9456	2.64907	0.00976649
AT3TE51635	LTR/Gypsy	ATHILA8A	18.4242	2.67424	0.00983352
AT2TE16170	DNA/En-Spm	ATENSPM10	193.807	2.64526	0.00985906
