# Supplementary material for: A genome-wide transcriptome and translatome analysis of Arabidopsis transposons identifies a unique and conserved genome expression strategy for Ty1/Copia retroelements
Source: HighWire-hosted journal article supplement (doi:10.1101/gr.220723.117), 2017-08-07
Supplement: Supplemental_Table_S2.xlsx [file Supplemental_Table_S2.xlsx]

## Sheet: TE.status
TE.ID	TE.Family	Status	Annatotion.Background
AT1TE12295	ATCOPIA78	not expressed	NA
AT1TE14315	META1	not expressed	NA
AT1TE18410	ATCOPIA89	unspliced	NA
AT1TE19430	ATCOPIA64	not expressed	NA
AT1TE21210	META1	not expressed	NA
AT1TE21710	META1	not expressed	NA
AT1TE30195	ATCOPIA16	spliced	ddm1
AT1TE30550	ATCOPIA3	unspliced	NA
AT1TE34335	ATCOPIA26	not expressed	NA
AT1TE34580	ATCOPIA73	spliced	ddm1
AT1TE36035	ATCOPIA51	spliced	ddm1
AT1TE38210	ATCOPIA31	unspliced	NA
AT1TE41580	ATCOPIA93	spliced	ddm1
AT1TE41800	ATCOPIA36	unspliced	NA
AT1TE42800	ATCOPIA69	not expressed	NA
AT1TE43225	ROMANIAT5	not expressed	NA
AT1TE43585	ATCOPIA84	not expressed	NA
AT1TE44380	ATCOPIA89	spliced	ddm1
AT1TE45805	TA1-2	not expressed	NA
AT1TE46405	ATCOPIA66	unspliced	NA
AT1TE51360	ROMANIAT5	not expressed	NA
AT1TE51580	ATCOPIA95	not expressed	NA
AT1TE52085	ATCOPIA49	not expressed	NA
AT1TE53090	ENDOVIR1	unspliced	NA
AT1TE53970	ATCOPIA69	unspliced	NA
AT1TE54585	ATCOPIA93	not expressed	NA
AT1TE54625	ATCOPIA35	not expressed	NA
AT1TE55795	ATCOPIA4	not expressed	NA
AT1TE56390	ATCOPIA79	spliced	ddm1
AT1TE56445	ATCOPIA1	spliced	Col-0
AT1TE57200	ATCOPIA75	unspliced	NA
AT1TE57530	ATCOPIA49	unspliced	NA
AT1TE57805	ATCOPIA15	spliced	Col-0
AT1TE58075	ATCOPIA38A	unspliced	NA
AT1TE58700	ATCOPIA51	spliced	ddm1
AT1TE59745	ATCOPIA49	unspliced	NA
AT1TE59755	ATCOPIA78	not expressed	NA
AT1TE62440	ATCOPIA36	unspliced	NA
AT1TE66380	ATCOPIA48	spliced	ddm1
AT1TE70190	ATCOPIA26	not expressed	NA
AT1TE70490	ATCOPIA22	spliced	ddm1
AT1TE71045	ATCOPIA78	not expressed	NA
AT1TE71775	ATCOPIA8B	spliced	ddm1
AT1TE71950	ATRE1	unspliced	NA
AT1TE72060	ATRE1	unspliced	NA
AT1TE72970	ATCOPIA5	spliced	met1
AT1TE76215	ATCOPIA51	spliced	ddm1
AT1TE86360	ATCOPIA11	spliced	ddm1
AT2TE04085	META1	not expressed	NA
AT2TE04130	ATCOPIA56	unspliced	NA
AT2TE06390	ATCOPIA28	not expressed	NA
AT2TE06405	META1	not expressed	NA
AT2TE07145	ATCOPIA95	unspliced	NA
AT2TE07175	ATCOPIA61	not expressed	NA
AT2TE07460	META1	not expressed	NA
AT2TE08785	ATCOPIA66	spliced	met1
AT2TE09100	ATCOPIA64	not expressed	NA
AT2TE10355	ATCOPIA30	not expressed	NA
AT2TE10495	ATCOPIA58	unspliced	NA
AT2TE10620	ATCOPIA40	unspliced	NA
AT2TE12115	ATCOPIA67	not expressed	NA
AT2TE12470	ATCOPIA68	unspliced	NA
AT2TE12510	ATCOPIA8A	spliced	Col-0
AT2TE12660	ATCOPIA13	not expressed	met1
AT2TE13385	ATCOPIA20	unspliced	NA
AT2TE13685	ATCOPIA32	spliced	ddm1
AT2TE15975	ATCOPIA96	not expressed	NA
AT2TE16030	ATCOPIA33	unspliced	NA
AT2TE17165	ATCOPIA66	not expressed	NA
AT2TE17380	ATCOPIA34	not expressed	NA
AT2TE17390	ATCOPIA35	not expressed	NA
AT2TE17870	ATCOPIA32B	unspliced	NA
AT2TE18665	ATCOPIA29	not expressed	NA
AT2TE19555	ATCOPIA34	not expressed	NA
AT2TE20835	ATCOPIA1	unspliced	NA
AT2TE20870	ATCOPIA66	unspliced	NA
AT2TE21855	ATCOPIA27	unspliced	NA
AT2TE23120	ATCOPIA97	not expressed	NA
AT2TE23545	ATCOPIA48	not expressed	NA
AT2TE23845	ATCOPIA49	unspliced	NA
AT2TE23855	ATCOPIA13	not expressed	ddm1
AT2TE26230	ATCOPIA9	spliced	ddm1
AT2TE27820	ATCOPIA36	unspliced	NA
AT2TE28160	ATCOPIA38	spliced	ddm1
AT2TE28260	ATCOPIA38	spliced	ddm1
AT2TE28325	ATCOPIA38B	spliced	ddm1
AT2TE29450	ATCOPIA70	spliced	met1
AT2TE30555	ATCOPIA71	spliced	ddm1
AT2TE31290	ATCOPIA39	not expressed	NA
AT2TE35840	ATCOPIA69	unspliced	NA
AT2TE37050	ATCOPIA72	spliced	ddm1
AT2TE38575	ATCOPIA74	unspliced	NA
AT2TE38900	ATCOPIA76	spliced	ddm1
AT2TE42485	ATCOPIA75	spliced	Col-0
AT2TE45020	ATCOPIA12	not expressed	NA
AT3TE38565	ATCOPIA65	not expressed	NA
AT3TE39220	ATCOPIA17	unspliced	NA
AT3TE40420	ATCOPIA82	spliced	ddm1
AT3TE42075	ATCOPIA49	unspliced	NA
AT3TE44000	ATCOPIA31A	unspliced	NA
AT3TE45800	ATCOPIA5	not expressed	NA
AT3TE46245	ATCOPIA19	not expressed	NA
AT3TE46255	ATCOPIA14	not expressed	met1
AT3TE47280	ATCOPIA41	not expressed	NA
AT3TE48460	ATCOPIA70	spliced	met1
AT3TE48480	ATCOPIA63	not expressed	NA
AT3TE48535	ATCOPIA97	not expressed	NA
AT3TE48590	ATCOPIA16	unspliced	NA
AT3TE51895	ROMANIAT5	not expressed	NA
AT3TE53640	ATCOPIA40	not expressed	NA
AT3TE54550	ATCOPIA78	not expressed	NA
AT3TE55430	ATCOPIA65	not expressed	NA
AT3TE58875	ATCOPIA80	not expressed	NA
AT3TE58930	ATCOPIA95	not expressed	NA
AT3TE60020	ATCOPIA40	not expressed	NA
AT3TE60635	ATCOPIA34	not expressed	NA
AT3TE60720	ATCOPIA28	not expressed	NA
AT3TE61000	META1	unspliced	NA
AT3TE62455	ATCOPIA33	unspliced	NA
AT3TE63050	ATCOPIA43	not expressed	NA
AT3TE63165	ATCOPIA16	spliced	ddm1
AT3TE63545	ATCOPIA50	not expressed	NA
AT3TE63765	ATCOPIA62	spliced	met1
AT3TE63950	META1	not expressed	NA
AT3TE64435	ATCOPIA11	spliced	ddm1
AT3TE64600	ATCOPIA41	not expressed	NA
AT3TE67635	ATCOPIA32	spliced	ddm1
AT3TE68090	ATCOPIA81	spliced	ddm1
AT3TE68730	ATCOPIA79	spliced	ddm1
AT3TE70410	META1	not expressed	NA
AT3TE72850	ATCOPIA44	unspliced	NA
AT3TE76010	META1	unspliced	NA
AT3TE76225	ATCOPIA52	spliced	ddm1
AT3TE89830	ATCOPIA78	not expressed	NA
AT3TE90530	ATCOPIA23	unspliced	NA
AT3TE91200	ATCOPIA51	spliced	ddm1
AT3TE92525	ATCOPIA78	not expressed	NA
AT3TE94195	ATCOPIA23	spliced	met1
AT4TE06710	ATCOPIA2	unspliced	NA
AT4TE09800	ATCOPIA59	not expressed	NA
AT4TE10165	ATCOPIA32B	unspliced	NA
AT4TE10320	ATCOPIA93	spliced	ddm1
AT4TE10335	ATCOPIA58	unspliced	NA
AT4TE10700	ATCOPIA10	unspliced	NA
AT4TE12175	ATCOPIA69	unspliced	NA
AT4TE12355	ATCOPIA56	unspliced	NA
AT4TE19450	ATCOPIA54	not expressed	NA
AT4TE19470	ATCOPIA53	spliced	ddm1
AT4TE21050	ATCOPIA10	not expressed	NA
AT4TE22095	ATCOPIA55	spliced	ddm1
AT4TE22180	META1	not expressed	NA
AT4TE24480	ATCOPIA26	not expressed	NA
AT4TE25100	ATCOPIA69	unspliced	NA
AT4TE25200	ATCOPIA51	spliced	ddm1
AT4TE25590	ATCOPIA49	unspliced	NA
AT4TE27640	ATCOPIA50	not expressed	NA
AT4TE28200	ATCOPIA7	spliced	Col-0
AT4TE28870	ATCOPIA17	spliced	ddm1
AT4TE29830	ATCOPIA22	spliced	ddm1
AT4TE32060	META1	not expressed	NA
AT4TE34305	META1	not expressed	NA
AT4TE36845	ATCOPIA17	unspliced	NA
AT4TE40685	ATCOPIA48	spliced	ddm1
AT4TE40695	ATCOPIA48	spliced	ddm1
AT4TE42860	ATCOPIA4	unspliced	NA
AT4TE43250	META1	not expressed	NA
AT4TE44080	ATCOPIA1	spliced	met1
AT4TE44990	META1	not expressed	NA
AT4TE49990	META1	not expressed	NA
AT4TE50435	ATCOPIA47	spliced	ddm1
AT4TE52315	ATCOPIA10	not expressed	NA
AT4TE53965	ATCOPIA22	spliced	ddm1
AT4TE67490	ATCOPIA46	spliced	ddm1
AT4TE85580	ATCOPIA45	not expressed	NA
AT5TE15240	ATCOPIA78	not expressed	NA
AT5TE20395	ATCOPIA93	spliced	ddm1
AT5TE23185	ATCOPIA89	spliced	ddm1
AT5TE23285	ATCOPIA90	unspliced	NA
AT5TE31200	ATCOPIA22	spliced	ddm1
AT5TE34040	META1	not expressed	NA
AT5TE36230	ATCOPIA86	spliced	ddm1
AT5TE36920	ATCOPIA12	not expressed	Col-0
AT5TE37815	ATCOPIA92	unspliced	NA
AT5TE37975	META1	not expressed	NA
AT5TE38745	ATCOPIA13	not expressed	NA
AT5TE38995	ATCOPIA68	spliced	ddm1
AT5TE39295	ATCOPIA45	not expressed	NA
AT5TE41485	ATCOPIA41	not expressed	NA
AT5TE41885	ATCOPIA65	not expressed	NA
AT5TE44715	ATCOPIA88	not expressed	Col-0
AT5TE46805	ATCOPIA45	not expressed	NA
AT5TE47100	ATCOPIA15	spliced	ddm1
AT5TE47195	ATCOPIA95	not expressed	NA
AT5TE48930	ATCOPIA24	spliced	ddm1
AT5TE49725	ATCOPIA12	not expressed	NA
AT5TE49915	ATCOPIA56	spliced	ddm1
AT5TE50260	ATCOPIA18A	unspliced	NA
AT5TE50380	ATCOPIA91	spliced	met1
AT5TE50775	ATCOPIA10	not expressed	NA
AT5TE51845	META1	not expressed	NA
AT5TE52075	META1	not expressed	NA
AT5TE54905	ATCOPIA87	unspliced	NA
AT5TE56585	ATCOPIA25	unspliced	NA
AT5TE56645	ATCOPIA83	not expressed	met1
AT5TE56665	ATCOPIA83	not expressed	met1
AT5TE61735	ATCOPIA15	spliced	met1
AT5TE65370	ATCOPIA21	spliced	met1
AT5TE65640	ATCOPIA23	unspliced	NA
AT5TE66565	ATCOPIA31	unspliced	NA
AT5TE68140	ATCOPIA58	spliced	ddm1
AT5TE77610	ATCOPIA85	not expressed	NA
AT5TE79225	ATCOPIA22	spliced	ddm1
AT5TE81385	ATCOPIA13	spliced	met1
AT5TE82430	META1	not expressed	NA
AT5TE83215	ATCOPIA49	unspliced	NA

## Sheet: Intron.Annotation
Supplemental Table S2. Novel annotation of Ty1/Copia element introns.
Most prominent introns selected from A. thaliana Ty1/Copia elements according to our de novo annotation algorithm (Fig. 2D).
TE.ID	Strand	Chromosome	TE.Start	TE.End	Intron.Start	Intron.End
AT2TE12510	-	2	2858588	2864201	2862154	2862284
AT3TE76225	+	3	18791152	18796089	18792672	18792811
AT1TE66380	+	1	20085179	20090143	20086716	20086846
AT4TE50435	+	4	10992996	10998058	10994544	10994674
AT3TE64435	-	3	15919028	15924078	15919513	15919573
AT1TE44380	+	1	13559846	13564825	13561415	13561761
AT4TE22095	-	4	5303773	5309049	5307335	5307459
AT2TE26230	-	2	6422230	6427295	6425679	6425803
AT1TE36035	-	1	11148308	11152649	11151242	11151381
AT4TE29830	-	4	6914662	6919511	6917877	6918169
AT3TE91200	-	3	22385751	22390053	22388685	22388824
AT2TE28325	+	2	6953995	6958817	6955497	6955843
AT5TE36230	+	5	9949205	9954436	9950833	9950963
AT4TE44080	-	4	9732598	9737733	9735712	9736067
AT4TE28200	+	4	6588726	6593808	6590267	6590391
AT1TE70490	-	1	21346162	21351041	21349333	21349625
AT1TE86360	+	1	26366603	26371673	26368234	26368595
AT5TE47100	-	5	13253682	13258510	13256652	13256998
AT5TE20395	+	5	5629978	5635310	5631487	5631782
AT3TE40420	-	3	9692214	9697529	9695726	9695856
AT5TE79225	-	5	22002017	22006884	22005180	22005472
AT2TE37050	-	2	8816056	8820891	8819030	8819376
AT1TE76215	+	1	23118240	23123214	23119783	23119922
AT1TE57805	+	1	17443085	17446790	17443586	17443823
AT4TE25200	+	4	5987004	5991976	5988545	5988684
AT4TE67490	+	4	14258825	14263830	14260317	14260441
AT1TE71775	+	1	21748194	21753388	21749803	21749933
AT5TE61735	-	5	17090876	17095159	17093758	17094104
AT4TE53965	-	4	11676468	11681340	11679632	11679924
AT4TE40685	+	4	9068941	9072918	9070529	9070659
AT1TE58700	-	1	17676786	17681203	17679798	17679937
AT5TE31200	-	5	8624511	8629386	8627677	8627969
AT4TE40695	+	4	9075042	9078896	9075258	9075388
AT2TE30555	-	2	7448762	7454292	7452212	7452585
AT3TE48460	+	3	11652697	11657744	11654129	11654418
AT2TE38900	-	2	9187492	9191655	9191502	9191576
AT3TE68090	-	3	16809185	16814151	16812467	16812756
AT5TE48930	-	5	13736030	13741129	13739329	13739688
AT3TE63765	-	3	15768787	15773753	15771868	15772214
AT4TE28870	+	4	6723347	6728790	6725177	6725550
AT2TE08785	-	2	1906835	1912111	1911603	1911750
AT1TE34580	+	1	10696714	10701584	10698245	10698591
AT5TE68140	-	5	18933096	18938943	18933654	18934111
AT2TE28160	-	2	6909755	6914586	6912732	6913078
AT5TE49915	+	5	13994796	14000227	13996987	13997188
AT5TE23185	-	5	6403053	6408058	6406151	6406497
AT4TE19470	+	4	4628762	4633895	4629349	4629563
AT5TE50380	-	5	14113154	14118424	14116286	14116659
AT1TE72970	-	1	22100644	22105329	22103851	22103996
AT3TE63165	+	3	15621873	15626851	15623443	15623799
AT5TE38995	+	5	10708157	10713296	10710794	10710882
AT1TE41580	+	1	12755060	12760395	12758912	12759064
AT2TE28260	+	2	6935766	6940571	6937277	6937611
AT1TE56390	-	1	17023916	17029257	17027455	17027585
AT1TE56445	+	1	17054926	17060041	17056576	17056930
AT1TE30195	-	1	9368345	9373307	9371405	9371760
AT5TE81385	-	5	22613355	22618266	22616576	22616865
AT4TE10320	+	4	2188979	2194314	2190416	2190759
AT2TE23855	+	2	5852699	5857428	5853939	5854228
AT3TE67635	-	3	16691859	16697596	16693588	16693839
AT5TE44715	+	5	12616214	12621590	12617620	12617909
AT3TE94195	-	3	23100352	23104844	23102952	23103050
AT5TE65370	-	5	18142156	18146898	18145358	18145503
AT5TE36920	+	5	10128750	10133862	10130159	10130448
AT2TE13685	-	2	3160553	3166309	3161336	3161396
AT3TE68730	-	3	16957465	16962731	16960940	16961070
AT2TE42485	-	2	9927685	9932560	9930940	9931229
AT5TE56645	-	5	15671474	15676400	15674688	15674977
AT5TE56665	-	5	15685038	15689976	15688264	15688553
AT2TE29450	-	2	7224084	7229124	7227368	7227656
AT2TE12660	+	2	2902330	2907117	2903731	2904020
AT3TE46255	-	3	11122707	11127674	11125947	11126236
