# Supplementary material for: A genome-wide transcriptome and translatome analysis of Arabidopsis transposons identifies a unique and conserved genome expression strategy for Ty1/Copia retroelements
Source: HighWire-hosted journal article supplement (doi:10.1101/gr.220723.117), 2017-08-07
Supplement: Supplemental_Table_S3.xlsx [file Supplemental_Table_S3.xlsx]

## Sheet: total vs. Polysome (Col-0)
Gene.ID	Gene.Class	baseMean	log2FoldChange	Adjusted.P-value
ATMG00080	protein_coding	4138.04	-3.4137	2.16286e-48
AT2G07708	protein_coding	3576.05	-3.65554	1.59152e-32
ATCG00660	protein_coding	2306.89	-3.24917	3.72792e-28
AT4G09150	protein_coding	1203.09	-3.29625	6.28315e-25
AT2G07671	protein_coding	17526.5	-3.49002	5.51484e-22
ATMG00580	protein_coding	9695.83	-2.31298	7.51803e-22
ATCG00040	protein_coding	11428.9	-3.13174	2.42758e-20
AT1G20920	protein_coding	324.562	-3.96209	7.48222e-20
AT2G07725	protein_coding	2215.63	-3.44256	2.56074e-19
ATCG01040	protein_coding	2927.08	-2.38648	3.09026e-18
AT1G25175	other_rna	5047.53	-2.45733	1.18243e-17
ATCG00630	protein_coding	12559.5	-3.82744	1.77252e-17
ATMG00090	protein_coding	6458.59	-3.5619	2.76062e-17
AT2G07723	pseudogene	2352.2	-3.5463	9.29249e-17
ATMG00500	protein_coding	1041.35	-3.05567	4.02588e-16
AT2G07811	pseudogene	5115.58	-3.56223	2.03588e-15
AT1G79245	pseudogene	1213.17	-3.66478	4.78117e-15
AT2G07709	pseudogene	6198.92	-2.8546	9.19943e-15
ATCG00540	protein_coding	7658.57	-2.82567	1.06401e-14
AT5G40340	protein_coding	681.17	-3.21441	1.57955e-14
ATCG00190	protein_coding	2837.91	-2.71525	4.99832e-14
ATCG00130	protein_coding	7568.42	-2.71776	1.61443e-13
AT3G13470	protein_coding	845.679	-2.2486	1.68742e-13
ATMG00210	protein_coding	1760.67	-4.15744	1.78504e-13
ATCG01200	pre_trna	7084.25	-3.27439	2.01737e-13
AT5G48570	protein_coding	849.136	-4.71504	5.69678e-13
ATMG01390	ribosomal_rna	5251.87	-3.69361	1.37046e-12
ATCG00930	pre_trna	6923.77	-3.25872	1.89128e-12
AT4G36648	other_rna	871.34	-2.30923	4.4414e-12
AT1TE41800	Transposable_element	468.417	-2.68244	1.21665e-11
ATCG00170	protein_coding	4299.04	-2.32088	1.46627e-11
ATCG01050	protein_coding	6197.71	-2.61048	1.95254e-11
AT3G28770	protein_coding	131.139	-3.58997	2.75383e-11
AT5G41471	small_nucleolar_rna	224.621	-4.46536	2.86601e-11
AT4G39364	small_nucleolar_rna	301.523	-4.0412	2.9368e-11
AT2G07747	pseudogene	1277.88	-3.41954	4.06102e-11
ATCG00180	protein_coding	3569.97	-2.6598	5.76789e-11
AT4G39363	small_nucleolar_rna	175.096	-3.51368	7.52101e-11
AT4G05631	protein_coding	920.367	-4.2529	8.77962e-11
AT5G54075	small_nucleolar_rna	2242.99	-4.62187	9.59041e-11
ATMG00180	protein_coding	2150.47	-3.68586	1.10233e-10
AT5G55660	protein_coding	711.977	-2.1245	2.08021e-10
AT1G67120	protein_coding	785.515	-3.10781	2.5521e-10
AT1G59218	protein_coding	1460.13	-1.98771	3.45257e-10
AT3G53980	protein_coding	616.722	3.11971	3.45257e-10
ATMG00730	protein_coding	5168.52	-3.06511	4.20682e-10
ATCG00020	protein_coding	256615	-2.84813	5.36741e-10
ATCG00360	protein_coding	3260.97	-3.31273	1.15346e-09
AT1G70620	protein_coding	435.484	-2.29784	1.32647e-09
AT5G40450	protein_coding	1194.86	-3.08218	1.63258e-09
AT2G07785	protein_coding	1033.23	-4.03816	1.6942e-09
ATMG01080	protein_coding	15314.5	-3.51104	1.6942e-09
AT2G07715	protein_coding	1722.01	-4.78044	2.11741e-09
ATCG00770	protein_coding	2103.98	-2.63347	2.88778e-09
ATCG00710	protein_coding	4019.54	-3.76336	3.58838e-09
ATCG00750	protein_coding	2084.48	-3.01165	4.42592e-09
ATMG00560	protein_coding	2587.55	-4.11871	4.42947e-09
AT2G30620	protein_coding	2285.61	2.49325	6.66763e-09
AT1G59124	protein_coding	1839.73	-2.12277	1.02561e-08
AT5G24620	protein_coding	331.351	-2.63098	1.32053e-08
AT1G75166	small_nucleolar_rna	201.834	-3.68309	1.46194e-08
AT2G35630	protein_coding	1092.91	-2.17046	1.6816e-08
AT1G58807	protein_coding	1818.04	-2.12751	2.02183e-08
AT1G75310	protein_coding	311.782	-2.74638	2.05446e-08
AT1G08115	small_nuclear_rna	1122.28	-4.75894	2.24175e-08
AT2TE84980	Transposable_element	60.6732	-5.52401	2.24175e-08
AT3G56825	small_nuclear_rna	780.605	-4.37923	2.62182e-08
AT4G11420	protein_coding	1998.36	-1.77043	2.89125e-08
AT4G36520	protein_coding	240.877	-3.21385	2.89125e-08
AT2G19780	protein_coding	264.976	2.7265	3.43011e-08
AT4G15180	protein_coding	592.031	-2.64289	4.38201e-08
AT1G29071	small_nucleolar_rna	100.541	-4.63109	4.45628e-08
ATCG00680	protein_coding	34194.4	-3.32445	6.46521e-08
AT2G16600	protein_coding	15625.6	1.95703	1.33157e-07
ATMG01380	ribosomal_rna	406.89	-2.62552	1.36116e-07
AT4G02430	protein_coding	120.558	-3.11161	1.36619e-07
AT3G50370	protein_coding	1293.01	-1.89797	1.89453e-07
AT1G47960	protein_coding	318.648	2.98296	2.42866e-07
AT5G59970	protein_coding	3171.24	1.68904	2.70603e-07
AT2G33435	protein_coding	236.445	-2.67808	3.27327e-07
ATCG00380	protein_coding	5430.14	-2.16007	3.27327e-07
ATMG00516	protein_coding	1771.91	-2.32171	3.27327e-07
AT1G18745	other_rna	93.501	-3.64966	3.67716e-07
AT1G29418	protein_coding	1036.24	-2.2116	3.82291e-07
AT1G45223	protein_coding	237.164	4.05234	5.58089e-07
AT3G44630	protein_coding	711.446	-2.04898	5.58861e-07
ATMG01190	protein_coding	16659.4	-3.00329	6.50611e-07
AT3G18280	protein_coding	699.173	2.94611	6.55198e-07
AT4G09650	protein_coding	2569.4	3.18449	6.96696e-07
AT5G25560	protein_coding	1016.42	-2.42425	9.06864e-07
AT2G07727	protein_coding	6682.61	-3.02705	1.01264e-06
AT3G25230	protein_coding	1347.67	-2.30988	1.01684e-06
AT3G55485	other_rna	119.888	-5.97436	1.20068e-06
AT5G15022	other_rna	142.01	-4.65228	1.46971e-06
AT1G48090	protein_coding	1261.78	-2.11148	1.52433e-06
ATCG01310	protein_coding	10119.4	-2.0328	1.59226e-06
AT1G65440	protein_coding	926.167	-1.99554	1.76115e-06
AT5G60120	protein_coding	140.726	-3.06367	2.22862e-06
AT5G24670	protein_coding	316.279	-2.36434	2.25556e-06
ATCG00830	protein_coding	10046.2	-2.01776	2.50809e-06
AT2G21530	protein_coding	420.156	2.82291	2.83302e-06
AT1G24880	protein_coding	4476.06	-2.04016	3.01852e-06
AT5G53902	small_nucleolar_rna	2126.74	-4.56513	3.04932e-06
AT1TE56805	Transposable_element	111.67	4.03984	3.29647e-06
AT3G63500	protein_coding	431.089	-2.44216	3.71799e-06
AT5G27670	protein_coding	1412.05	1.64564	4.08026e-06
AT1G04300	protein_coding	396.841	-2.61782	4.17834e-06
AT1G30400	protein_coding	655.057	-2.13738	4.17834e-06
AT1G21580	protein_coding	873.737	-1.81156	4.60093e-06
AT1G22640	protein_coding	655.946	2.30436	4.6264e-06
AT2G13370	protein_coding	437	-2.5075	5.10118e-06
AT2G03150	protein_coding	534.01	-2.56443	5.83704e-06
AT1G28420	protein_coding	502.129	-2.28081	6.74706e-06
ATCG00720	protein_coding	16494.7	-2.86997	6.75561e-06
AT3G10610	protein_coding	1339.51	1.69843	8.23069e-06
AT2G45100	protein_coding	88.2376	-3.60803	8.60121e-06
AT4G18425	protein_coding	895.151	2.72702	9.28517e-06
AT2G02400	protein_coding	182.273	3.00784	9.4971e-06
AT5G08450	protein_coding	686.4	-1.80919	9.85828e-06
ATCG01170	ribosomal_rna	233.823	-4.98311	1.20237e-05
AT2G18050	protein_coding	366.667	3.46957	1.27015e-05
AT2G05765	small_nucleolar_rna	477.777	-3.40641	1.38373e-05
AT3G47347	small_nucleolar_rna	129.522	-4.47978	1.38373e-05
AT5G27660	protein_coding	3033.11	-2.6378	1.42516e-05
AT2G07698	protein_coding	21699.8	-2.89123	1.46853e-05
ATCG00960	ribosomal_rna	228.71	-4.9527	1.46853e-05
AT2G43150	protein_coding	301.009	-3.22178	1.53504e-05
AT2G35382	small_nucleolar_rna	72.9618	-5.44097	1.74455e-05
AT3G08730	protein_coding	407.019	-2.35976	1.85388e-05
AT2G25140	protein_coding	495.759	-2.27725	2.07307e-05
AT1G79830	protein_coding	797.561	-2.15607	2.09378e-05
AT5G08050	protein_coding	1366.17	2.1835	2.1224e-05
AT3G07280	pseudogene	146.715	-2.77295	2.26479e-05
AT1G58848	protein_coding	1558.74	-1.90025	2.28837e-05
ATMG00660	protein_coding	836.523	-3.55785	2.28866e-05
AT3G59068	other_rna	248.024	-3.93644	2.64826e-05
AT2G20722	small_nucleolar_rna	88.2808	-4.73646	2.80591e-05
AT3G56705	small_nuclear_rna	230.735	-5.77774	3.02415e-05
AT5G10550	protein_coding	669.845	-2.50582	3.05555e-05
AT2G07783	pseudogene	966.147	-2.39006	3.33244e-05
AT1G76810	protein_coding	1053.03	-1.85984	3.57894e-05
AT3G01185	protein_coding	30.1373	4.9189	3.72362e-05
ATCG00905	protein_coding	4100.92	-2.40543	4.13146e-05
AT5TE21430	Transposable_element	112.6	-3.71394	4.20609e-05
AT5TE58310	Transposable_element	199.759	-3.21716	4.38001e-05
ATMG01360	protein_coding	11275.7	-2.16894	4.58495e-05
AT2G28290	protein_coding	1825.91	-1.99971	4.7954e-05
AT4G14760	protein_coding	398.95	-2.10179	4.7954e-05
ATCG01280	protein_coding	6071.33	-2.80673	4.92321e-05
AT2G35750	protein_coding	3842.12	-3.6311	5.45106e-05
AT2G07774	protein_coding	371.556	-2.65641	6.03422e-05
AT5G27860	protein_coding	515.322	-1.825	7.21761e-05
ATCG00900	protein_coding	10752.1	-2.0406	7.35814e-05
AT1G08600	protein_coding	349.446	-1.87257	7.38589e-05
AT4G23570	protein_coding	610.311	-2.41413	7.88561e-05
ATCG01230	protein_coding	4089.3	-2.32853	9.86135e-05
AT1G44910	protein_coding	308.489	-2.53073	0.000100375
AT2G07696	protein_coding	599.897	-3.02249	0.000110801
AT1G55350	protein_coding	1148.22	-1.90267	0.000119247
AT1G64790	protein_coding	1231.88	-1.88057	0.000119247
AT2TE39860	Transposable_element	141.869	-2.81496	0.000119247
ATMG00480	protein_coding	5806.93	-3.12795	0.000119247
ATCG00860	protein_coding	6038.87	-2.76164	0.000120493
AT2G07815	protein_coding	900.74	-2.8126	0.0001321
AT3G44380	protein_coding	502.829	1.77248	0.000133107
AT3G02260	protein_coding	2328.53	-1.86422	0.000133822
AT1G79280	protein_coding	1003.07	-1.882	0.00013451
AT2G07717	pseudogene	9298.43	-2.16513	0.000139123
AT3G13525	small_nucleolar_rna	55.9785	-5.31702	0.000154327
AT1G02335	protein_coding	303.436	2.3848	0.000170047
AT2G36410	protein_coding	914.912	1.59991	0.000171659
AT1G22960	protein_coding	61.527	-5.54265	0.000175258
AT5G44180	protein_coding	439.276	-1.93076	0.000179208
ATCG00620	pre_trna	100.028	-4.64057	0.000179208
AT5TE49770	Transposable_element	94.981	-2.84809	0.000201578
AT1G56660	protein_coding	202.856	-3.98955	0.000205407
AT2G35387	small_nucleolar_rna	37.2368	-4.35422	0.000207207
ATMG01320	protein_coding	2026.29	-3.82836	0.000209666
AT2G32060	protein_coding	2686.05	1.91041	0.000231287
AT1G36160	protein_coding	2470.45	-1.53532	0.00025176
AT3G11964	protein_coding	751.06	-2.06075	0.000252968
AT1G60200	protein_coding	401.399	-1.85865	0.000305472
AT2G07711	pseudogene	3526.92	-3.49647	0.000329304
AT4G12400	protein_coding	1231.9	-3.268	0.000337198
AT4TE13930	Transposable_element	228.405	-4.51029	0.000344069
ATCG00450	pre_trna	2756.34	-3.8005	0.000344069
AT1G27770	protein_coding	674.29	-2.24393	0.000361322
AT5G52640	protein_coding	2026.13	-3.16121	0.000362727
AT3G57765	small_nuclear_rna	840.961	-3.49662	0.000368305
AT2G07599	protein_coding	306.932	-4.27798	0.000376414
AT5G56850	protein_coding	186.061	-2.50284	0.0003846
ATMG00513	protein_coding	2986.48	-3.47661	0.0003846
AT5G13225	small_nucleolar_rna	40.7021	-4.51903	0.00038782
AT5G02640	protein_coding	28.7093	4.99987	0.000388065
AT5G26667	protein_coding	1915.45	1.67116	0.000393083
AT4G18800	protein_coding	413.998	1.91627	0.000437942
AT1G45215	protein_coding	546.201	3.5065	0.000441889
AT2G02850	protein_coding	532.979	2.39872	0.000441889
AT3TE71210	Transposable_element	104.682	-3.13914	0.000462342
ATMG00510	protein_coding	5152.86	-2.32862	0.000490244
AT1G74456	small_nucleolar_rna	67.1637	-3.40614	0.000501502
AT2G38900	protein_coding	14.0902	6.46029	0.000538171
AT1G53130	protein_coding	342.138	2.69477	0.000552572
AT2TE77015	Transposable_element	109.93	-5.3124	0.000566025
AT5G06165	other_rna	580.062	-3.16317	0.000580324
AT5G23890	protein_coding	492.482	-2.20449	0.000588434
AT2G34825	protein_coding	32.7229	5.84858	0.000636279
AT1G03746	small_nucleolar_rna	114.192	-4.47152	0.000639569
AT2G07675	protein_coding	418.875	-2.44187	0.000642801
AT2TE77005	Transposable_element	98.5274	-5.37741	0.000674332
AT2G20721	small_nucleolar_rna	94.6473	-2.85949	0.000675119
AT1G22930	protein_coding	1124.11	-2.07383	0.000698804
AT2G19110	protein_coding	853.705	-2.73689	0.000698804
ATMG01280	protein_coding	1478.95	-3.27706	0.000698804
AT4G02650	protein_coding	58.9103	-2.9029	0.000699041
AT4G00170	protein_coding	290.481	1.84993	0.000709855
AT4G32208	protein_coding	715.922	-2.11585	0.000709855
ATMG00960	protein_coding	257.427	-3.77209	0.0007365
AT3G61198	other_rna	113.477	-5.156	0.000770795
AT5G15770	protein_coding	101.693	2.4963	0.000781565
AT5G39220	protein_coding	156.338	3.17468	0.000795996
AT4G26630	protein_coding	1173.21	-1.56326	0.000835201
AT4G08025	protein_coding	60.2357	3.17554	0.00084055
AT5G62570	protein_coding	275.749	-2.16317	0.000848264
ATMG00690	protein_coding	1150.98	-3.34513	0.000900761
AT2G25482	protein_coding	83.2847	3.09585	0.000914096
ATCG00510	protein_coding	599.782	-2.75654	0.000962099
AT1G79920	protein_coding	2233.92	-1.7155	0.000974791
AT5G35680	protein_coding	3575.68	1.45307	0.000985534
AT5G22060	protein_coding	697.106	-1.61681	0.000988428
AT5G63980	protein_coding	446.176	2.06426	0.00105033
AT2G01100	protein_coding	186.742	-2.279	0.0011387
AT3G42640	protein_coding	687.289	-2.52238	0.00117317
AT5G09590	protein_coding	1709.49	-1.96035	0.00120361
ATCG01240	protein_coding	10616.6	-2.00173	0.00120361
AT5G61455	small_nuclear_rna	498.69	-2.83164	0.00121522
AT2G40590	protein_coding	306.923	3.29716	0.00121549
AT3G43300	protein_coding	868.94	-2.25937	0.00125422
AT1G65480	protein_coding	99.141	2.67878	0.00126886
AT3G56590	protein_coding	220.814	-2.41943	0.00129873
AT3G49601	protein_coding	473.097	-1.74911	0.00135942
ATMG00020	ribosomal_rna	21919.8	-2.17037	0.00142658
AT4TE38400	Transposable_element	57.9076	-5.2733	0.00150791
AT1G06720	protein_coding	324.81	-2.3338	0.00155714
AT1G27752	protein_coding	153.265	-2.14912	0.00156385
AT1G60260	protein_coding	222.401	-2.87919	0.00156385
AT1G13930	protein_coding	35214.9	1.64757	0.00163693
AT1G13350	protein_coding	185.637	-2.52265	0.00169262
AT1G20100	protein_coding	748.926	-1.62049	0.00175076
AT2G39280	protein_coding	256.097	-2.54196	0.00175076
AT1TE42350	Transposable_element	26.98	-4.5064	0.00184405
ATMG00285	protein_coding	1388.62	-3.54817	0.00186811
AT2G26190	protein_coding	334.129	-2.33592	0.00189015
ATMG00070	protein_coding	3511.72	-2.21128	0.00190417
AT3G01313	small_nucleolar_rna	89.0438	-3.23345	0.00200765
AT4G15258	small_nucleolar_rna	111.51	-2.64227	0.00208248
ATCG00440	protein_coding	10742.5	-1.93045	0.00208835
AT1G65010	protein_coding	1262.29	-1.60131	0.00221917
AT1G67740	protein_coding	3290.12	2.90647	0.00224182
ATCG00590	protein_coding	389.143	-3.39406	0.00234093
AT1G28305	protein_coding	65.6343	2.5043	0.00239998
AT1G45221	protein_coding	559.15	3.46038	0.00239998
AT2G27800	protein_coding	39.2507	4.23908	0.00248977
AT1G16510	protein_coding	53.2344	4.37827	0.00252162
AT2G29210	protein_coding	514.323	-1.76861	0.00265312
AT2G45920	protein_coding	128.961	-2.53691	0.00265312
AT5G24860	protein_coding	1269.71	1.97516	0.00265312
AT2G07707	protein_coding	5621.71	-2.84563	0.00271408
AT1G74250	protein_coding	137.085	-2.53144	0.00273014
AT5G38150	protein_coding	119.866	-3.88675	0.00292323
AT3G14735	small_nuclear_rna	59.0882	-4.37708	0.00313364
AT1G80930	protein_coding	588.633	-1.69287	0.00319716
AT3G55490	protein_coding	72.895	2.61589	0.00319716
AT2G16940	protein_coding	595.821	-1.79057	0.00324183
AT5G64430	protein_coding	425.928	2.27068	0.00325081
AT2G44050	protein_coding	249.514	2.12659	0.00326236
AT1TE70615	Transposable_element	70.8196	3.83562	0.00338722
AT2G07768	protein_coding	190.135	-3.7664	0.00338722
AT3G12580	protein_coding	3901.59	-2.72176	0.00338722
AT4G31060	protein_coding	44.2712	-3.08577	0.00338722
AT1G56280	protein_coding	4698.14	-1.55077	0.00343069
AT1G57760	protein_coding	70.6723	3.83145	0.00348057
AT1G59520	protein_coding	101.145	-2.8913	0.00348057
AT2G07806	protein_coding	66.4974	-4.91517	0.00348057
AT1G52360	protein_coding	867.508	-1.77454	0.00352556
AT2G43970	protein_coding	948.998	-1.82939	0.00352556
AT4G03205	protein_coding	179.081	-2.4353	0.00352556
AT5G24740	protein_coding	322.689	-3.32698	0.00352556
AT1G63080	protein_coding	60.7401	-3.13133	0.00355878
AT1G68360	protein_coding	70.7353	3.39677	0.00355878
AT2G27315	protein_coding	98.1885	3.43123	0.00355878
ATCG00220	protein_coding	10284.8	-2.27355	0.00359572
AT2G22470	protein_coding	546.058	2.25694	0.00360021
AT2G28410	protein_coding	325.058	1.7869	0.00362033
AT1G68890	protein_coding	348.44	-2.70144	0.00362768
ATMG00980	protein_coding	434.326	-2.33246	0.00363871
AT3G07215	other_rna	199.415	-2.56749	0.00377283
ATMG01170	protein_coding	3719.3	-2.2209	0.00388584
AT4G11830	protein_coding	438.019	-1.69571	0.00391485
AT1G77525	protein_coding	147.315	2.8829	0.00397417
AT4G30990	protein_coding	556.074	-2.38674	0.00409209
AT4G22880	protein_coding	69.0574	3.72526	0.0048754
AT1G04645	protein_coding	14.9768	5.41471	0.00492552
AT3G19050	protein_coding	384.095	-2.55702	0.00496179
AT1G31540	protein_coding	160.637	-2.87181	0.00519272
AT5G59850	protein_coding	8885.32	1.40558	0.00519272
AT1G15200	protein_coding	456.155	-1.91823	0.00521172
AT5G13010	protein_coding	577.273	-1.84103	0.00521172
AT3G03300	protein_coding	210.825	-2.83484	0.00541493
AT3G21805	small_nucleolar_rna	134.354	-3.41908	0.00554381
ATMG01275	protein_coding	765.18	-4.42418	0.00554964
AT2G22795	protein_coding	579.136	-2.23905	0.00559529
AT4G26190	protein_coding	411.538	-1.84748	0.00571708
AT2G37870	protein_coding	25.6565	3.52234	0.00572401
AT1G07370	protein_coding	301.247	1.95476	0.00572412
AT1G62510	protein_coding	49.2873	5.37319	0.00576922
AT5TE83185	Transposable_element	87.7941	-2.53697	0.00587665
ATCG00670	protein_coding	6551.07	-2.31988	0.00607171
AT1G64960	protein_coding	106.574	-2.36794	0.00617311
AT3TE43630	Transposable_element	22.326	-5.02973	0.00619383
AT5G28400	protein_coding	191.894	-3.81902	0.00621105
AT3G23990	protein_coding	1106.79	-1.80197	0.0064056
AT1G60545	other_rna	58.238	-4.26372	0.00641354
AT4G26365	small_nucleolar_rna	38.7846	-5.05567	0.00646284
AT4G20780	protein_coding	81.5299	2.96147	0.00675629
AT4G29240	protein_coding	257.661	2.24033	0.00684793
AT2TE23870	Transposable_element	344.759	-1.69416	0.00705135
AT2G07681	protein_coding	652.155	-2.43677	0.00717607
AT2G27730	protein_coding	2122.92	1.70816	0.00723527
AT1G71340	protein_coding	1231.99	-1.60222	0.00728052
AT5G45190	protein_coding	296.969	-2.00504	0.00736584
AT2G07716	pseudogene	971.772	-2.33255	0.00806313
AT3G17150	protein_coding	114.872	2.71061	0.00810626
AT2G14255	protein_coding	120.601	-2.44794	0.00834123
AT1G80070	protein_coding	3496.32	-1.45054	0.0083731
AT5G51700	protein_coding	228.273	1.84387	0.00842487
AT1G47470	protein_coding	33.9109	3.84285	0.00851187
ATMG00040	protein_coding	5312.6	-3.04727	0.00865036
AT1G15240	protein_coding	246.392	-2.15775	0.00894536
AT1G67070	protein_coding	42.6039	4.60937	0.00959514
AT3G52250	protein_coding	485.261	-2.7632	0.0096241
AT3G56160	protein_coding	309.609	-2.24878	0.0096599
AT3G50690	protein_coding	549.495	-1.6488	0.00980147
AT2TE15155	Transposable_element	88.5192	-3.61305	0.00992295
AT4G07960	protein_coding	332.913	-2.52328	0.0100527
ATCG00730	protein_coding	8442.55	-2.38442	0.0100527
AT4TE38410	Transposable_element	27.457	-5.02733	0.0102079
AT1G28306	protein_coding	29.9425	3.93882	0.0102828
AT1TE91365	Transposable_element	44.706	-3.54079	0.0106974
ATCG00760	protein_coding	987.044	-2.9058	0.0106974
AT1G15405	other_rna	33169.8	-3.90799	0.0107508
AT1G19210	protein_coding	26.4606	4.2627	0.0107508
AT1G51060	protein_coding	2300.25	1.39739	0.0107508
AT4G09465	protein_coding	43.0377	2.51895	0.0107508
AT4G17140	protein_coding	1312.68	-2.27056	0.0107508
AT3G47348	small_nucleolar_rna	119.923	-3.21274	0.010851
AT2G07695	protein_coding	1232.02	-3.31019	0.0109272
AT3G50820	protein_coding	2356.21	2.74409	0.0110566
AT4TE09245	Transposable_element	40.4723	4.7332	0.0110566
AT5G08185	protein_coding	65.3902	-2.37552	0.0114218
AT4G30800	protein_coding	370.426	1.91471	0.0116554
AT2G45540	protein_coding	1346.69	-1.57541	0.0117809
AT5G15020	protein_coding	451.34	-2.65997	0.0118524
AT5G38140	protein_coding	41.7648	-3.68115	0.0118524
AT1G74310	protein_coding	3444.19	-3.10697	0.0119465
AT3G24612	small_nucleolar_rna	27.4318	-4.90586	0.0119982
AT5G02260	protein_coding	253.152	1.88981	0.0122383
AT5G06690	protein_coding	119.644	2.97216	0.0122383
ATMG00220	protein_coding	4759.6	-2.23983	0.0123662
AT3G06500	protein_coding	343.953	-2.12219	0.0123962
AT1G51430	protein_coding	157.003	-2.22381	0.0124632
AT2G07733	pseudogene	1765.46	-2.86608	0.0124811
AT2G18100	protein_coding	31.599	-3.47504	0.0124811
AT3G15550	protein_coding	152.563	-2.53879	0.0124811
AT3G50825	small_nucleolar_rna	48.5706	-3.03738	0.0124811
AT4G30074	protein_coding	14.4341	4.50444	0.0124811
AT4G36980	protein_coding	471.351	-2.06217	0.0124811
ATMG00640	protein_coding	2052.7	-3.14698	0.0125726
AT5G18255	other_rna	295.747	-2.83274	0.0126996
ATMG01120	protein_coding	1142.01	-2.59248	0.0129364
AT2G35110	protein_coding	303.903	-2.08034	0.013307
AT3G10890	protein_coding	30.4528	4.91207	0.0133322
AT5G16730	protein_coding	566.414	-1.82863	0.0136646
ATCG01110	protein_coding	1384.82	-4.13948	0.0136646
ATMG00570	protein_coding	880.848	-2.3521	0.0137164
AT3G44115	protein_coding	99.636	3.35669	0.0137685
AT4G19690	protein_coding	114.04	2.13432	0.0138184
AT4G30910	protein_coding	59.4356	-2.89036	0.0138184
AT3G59830	protein_coding	24.2287	-4.63759	0.013986
AT1G08880	protein_coding	1393.02	1.4879	0.0144116
AT1G68790	protein_coding	358.115	-1.90871	0.0144116
AT3G14560	protein_coding	884.671	1.87313	0.0144512
AT4G12460	protein_coding	242.987	-2.27436	0.0144512
AT4G32420	protein_coding	429.748	-1.79269	0.0146449
AT2G03200	protein_coding	84.7374	2.90292	0.0149651
AT5G04290	protein_coding	160.268	-2.09518	0.0149722
AT1G12890	protein_coding	15.4254	4.82113	0.0154269
AT5G27970	protein_coding	539.084	-1.62263	0.0155024
AT4TE30225	Transposable_element	65.5544	-3.28901	0.0156054
AT3G07820	protein_coding	1162.58	-1.60856	0.0157163
AT1G75870	protein_coding	54.9867	-3.02606	0.0158273
AT1G32490	protein_coding	458.657	-1.73693	0.0161855
AT5G41020	protein_coding	172.032	-2.20086	0.016744
ATCG00270	protein_coding	19006.3	-2.45387	0.016744
ATCG00420	protein_coding	1812.55	-2.09733	0.0168514
AT1G45227	pseudogene	47.9598	3.65521	0.0169492
AT1G62840	protein_coding	15.5864	4.8351	0.0171855
AT5G02940	protein_coding	760.753	-1.74079	0.0171855
AT3G57950	protein_coding	42.152	3.27566	0.0173229
AT3TE49960	Transposable_element	13.638	5.02656	0.0174522
ATMG01020	protein_coding	151.669	-3.97982	0.017468
AT1TE56795	Transposable_element	158.842	3.11198	0.0181434
AT5G42800	protein_coding	43.6151	4.32538	0.0182363
AT1G69070	protein_coding	396.456	-1.58072	0.0186911
AT4TE13950	Transposable_element	395.846	-2.73444	0.0187106
AT1G32750	protein_coding	453.24	-1.78856	0.019205
AT1G10760	protein_coding	1551.38	-1.87317	0.0192941
AT1G58602	protein_coding	300.161	-2.43947	0.0192941
ATCG00970	ribosomal_rna	176.09	-3.14908	0.0192941
ATCG01130	protein_coding	6599.35	-1.73883	0.0192941
AT3G58160	protein_coding	79.3186	-3.08838	0.0194045
AT5G28320	protein_coding	174.304	-3.87247	0.0194127
AT1G12020	protein_coding	98.2238	2.7948	0.0194969
ATMG01270	protein_coding	401.938	-2.54453	0.0194969
AT2G07761	pre_trna	59.9599	-3.16662	0.0213405
ATCG00520	protein_coding	2170.48	-2.04727	0.0213405
ATMG00340	pre_trna	59.9599	-3.16662	0.0213405
AT2G48160	protein_coding	524.685	-1.96454	0.021388
AT5G38710	protein_coding	39.5715	3.83967	0.021388
AT2G13790	protein_coding	148.132	-2.98315	0.0217765
AT3G58196	small_nucleolar_rna	23.5621	-4.09482	0.0220004
AT5G59390	protein_coding	73.822	-2.28331	0.0223725
AT5G60930	protein_coding	417.022	-1.67754	0.0229009
ATCG00560	protein_coding	3493.38	-2.19832	0.0229009
AT1G22990	protein_coding	70.3537	2.8128	0.0234682
AT2TE46170	Transposable_element	16.2846	-4.8441	0.0235358
AT2G25460	protein_coding	49.9546	-2.65757	0.0235912
AT4G34870	protein_coding	36615.5	1.41492	0.0238019
ATCG00065	protein_coding	1036.38	-3.4938	0.0241541
AT3G24614	small_nucleolar_rna	23.2497	-4.12353	0.0243966
AT3G17450	protein_coding	201.697	-1.84163	0.0245733
AT4G25730	protein_coding	724.392	-1.73734	0.0246244
AT4G23690	protein_coding	690.746	2.5245	0.0246771
AT2G21080	protein_coding	36.5107	-4.07589	0.0248273
AT3G29390	protein_coding	227.08	-2.36568	0.0248273
AT4G34110	protein_coding	6451.73	-1.55292	0.0248273
AT4G27852	other_rna	20.2531	-3.85444	0.025523
AT5G63010	protein_coding	55.8971	3.15876	0.025523
ATMG01370	protein_coding	248.51	-2.50002	0.0257512
AT2G28720	protein_coding	649.485	1.71326	0.0267649
AT5G17480	protein_coding	71.92	2.66063	0.0270759
AT2G25730	protein_coding	659.003	-1.88862	0.0275888
AT1G07790	protein_coding	2319.95	1.57522	0.0278998
AT3G13857	protein_coding	64.2157	-3.49114	0.0280166
AT4G10070	protein_coding	98.3595	-2.9493	0.0280166
ATCG00310	pre_trna	49.9358	-3.41327	0.0280166
ATMG01090	protein_coding	585.027	-2.48375	0.0285851
ATMG00410	protein_coding	5359.6	-2.03897	0.0286336
AT1G73630	protein_coding	216.266	2.95164	0.0289619
AT5G28340	protein_coding	43.0698	-4.10478	0.0289619
AT4G19190	protein_coding	137.863	-2.26365	0.0289648
AT5G28740	protein_coding	492.822	-1.69876	0.0289648
AT4G27595	protein_coding	231.608	-2.23203	0.0289835
AT3G58490	protein_coding	253.981	-1.78413	0.0304127
AT1G55860	protein_coding	1533.02	-1.72145	0.0309503
AT5G15150	protein_coding	55.6579	3.44663	0.031329
AT1G54530	protein_coding	16.6428	4.2307	0.031599
AT4G03295	small_nucleolar_rna	18.6488	-4.61881	0.0318669
AT2G07777	protein_coding	425.136	-2.56924	0.0330016
AT3TE57780	Transposable_element	379.35	-3.9399	0.0336586
ATMG01160	pre_trna	32.5742	-4.37149	0.0337643
AT2G39795	protein_coding	173.287	2.01991	0.0339923
AT4G35320	protein_coding	189.587	2.27805	0.0339923
AT1TE72065	Transposable_element	482.136	-1.74936	0.0360417
AT2G07699	pseudogene	3646.6	-2.03966	0.0363059
AT2G28570	protein_coding	62.4968	-3.80863	0.0363059
AT1G44542	protein_coding	311.449	1.87612	0.0364919
AT4G01470	protein_coding	197.629	2.69757	0.0367868
AT4G05330	protein_coding	88.5401	-2.88604	0.039308
AT1G08500	protein_coding	63.4373	2.28823	0.0395564
AT5G47500	protein_coding	560.494	-1.62518	0.0395564
AT3G53430	protein_coding	7267.35	1.32949	0.0405231
AT1TE71955	Transposable_element	481.566	-1.7402	0.0405744
AT5G14990	protein_coding	11.2206	-4.3087	0.0405744
AT1G05570	protein_coding	582.858	-1.85047	0.0411674
AT5G28380	protein_coding	36.445	-2.97433	0.0412906
AT5G26692	protein_coding	519.106	3.0955	0.0415125
AT1G66730	protein_coding	175.551	-2.64084	0.0420767
AT1G79000	protein_coding	607.006	-1.95225	0.0420767
AT3G07420	protein_coding	59.0799	-3.11945	0.0420767
AT4G01020	protein_coding	155.23	-2.22471	0.0420767
AT5G39850	protein_coding	138.076	2.02852	0.0423709
AT5G61140	protein_coding	420.836	-2.39097	0.0423709
AT5G40920	pseudogene	146.314	-2.57712	0.0423983
AT2G07749	protein_coding	65.1924	-4.33298	0.0426981
ATCG00430	protein_coding	2042.59	-2.11349	0.0426981
AT2G01008	protein_coding	3502.84	-2.28873	0.0433446
ATCG01060	protein_coding	3515.25	-2.53785	0.0446832
AT3G13390	protein_coding	1067	2.30436	0.0447458
AT2G21465	protein_coding	88.7601	2.13835	0.0448413
AT3G12830	protein_coding	119.851	2.24822	0.0449284
AT2G06210	protein_coding	377.857	-2.15217	0.0451706
AT1G29160	protein_coding	32.4637	3.66097	0.0457839
AT5G12110	protein_coding	470.849	-2.36552	0.0467051
AT5G61900	protein_coding	339.377	-2.35633	0.0468469
AT2G21650	protein_coding	39.6284	3.49019	0.0468534
AT1G31970	protein_coding	851.157	-1.55762	0.047262
AT2G07719	protein_coding	387.416	-2.44952	0.047262
AT3TE63935	Transposable_element	1306.68	-2.05317	0.0476108
AT1G61566	protein_coding	930.784	-2.06916	0.0485648
ATCG01120	protein_coding	504.774	-2.07844	0.0485648
AT2G45380	protein_coding	433.043	-1.76223	0.0491487
AT3G54670	protein_coding	622.468	-1.52237	0.0497687
AT4G15030	protein_coding	104.4	-1.94278	0.0498695
AT1G52970	protein_coding	70.6927	3.24947	0.0498902
AT4G21320	protein_coding	283.591	-2.36645	0.0499265
AT4G10120	protein_coding	353.445	-1.87606	0.0501879
ATCG00300	protein_coding	3586.15	-2.03898	0.050199
AT4G15910	protein_coding	737.808	-1.72298	0.050298
AT1G77400	protein_coding	22.7708	3.92589	0.0506704
ATCG00400	pre_trna	6618.62	-3.85385	0.0510915
AT1G59620	protein_coding	60.7808	-2.71489	0.0516667
AT1TE36130	Transposable_element	46.8446	-2.90657	0.0516667
AT3G13400	protein_coding	1853.94	-2.13062	0.0516667
AT3G62100	protein_coding	18.4884	3.79559	0.0516667
AT3G14380	protein_coding	224.833	1.92556	0.0518124
AT5G61910	protein_coding	484.237	-2.13038	0.0532982
AT2G28840	protein_coding	868.191	-1.6524	0.0534346
AT3G47342	small_nucleolar_rna	52.1695	-2.95811	0.0534346
AT5TE37370	Transposable_element	119.954	-4.53053	0.0537301
AT5TE37380	Transposable_element	119.894	-4.52984	0.0537301
AT5G03840	protein_coding	28.7556	3.20139	0.0544691
AT5TE37400	Transposable_element	117.847	-4.53555	0.0549008
AT2G06090	protein_coding	12.0448	4.60496	0.0550168
AT4TE89030	Transposable_element	42.363	3.40169	0.0550168
AT2G21090	protein_coding	68.4027	-2.8909	0.0560358
AT1G55140	protein_coding	182.502	2.07045	0.0562993
AT5G66620	protein_coding	22.2594	-3.67179	0.0566611
AT1G77060	protein_coding	103.009	-2.37155	0.0567556
AT4G12890	protein_coding	147.521	1.84999	0.0588937
AT2G24570	protein_coding	260.196	2.17537	0.0590921
AT5G44750	protein_coding	211.613	-2.10232	0.0604053
AT2G07741	protein_coding	4930.27	-1.97013	0.0607868
AT3G12500	protein_coding	22.4189	2.86012	0.0610299
AT3G57470	protein_coding	228.671	-2.78079	0.0611953
AT3G13672	protein_coding	13.9421	4.53819	0.0624822
AT3G21550	protein_coding	559.293	1.58295	0.0624822
AT1G45225	pseudogene	101.945	3.49857	0.0626965
AT3G21710	protein_coding	20.7479	4.50059	0.0626965
AT3G25840	protein_coding	749.894	-1.47419	0.0626965
AT1G53785	protein_coding	76.9112	-3.79072	0.0630256
AT5G46510	protein_coding	377.397	-2.05872	0.0636664
AT1G03600	protein_coding	827.978	1.853	0.0640098
AT2G07667	protein_coding	45.7521	-3.45585	0.0649023
ATMG00630	protein_coding	20.3052	-4.51276	0.067992
AT5G39190	protein_coding	119.08	2.52514	0.068169
AT2G32795	other_rna	20.8446	-2.98293	0.0682168
AT5G44265	protein_coding	16.6656	4.33641	0.0682168
ATCG01160	ribosomal_rna	184.104	-2.90601	0.068361
AT1G28310	protein_coding	189.594	1.98429	0.0701471
AT1G78410	protein_coding	21.2794	4.20751	0.0703329
AT1G11960	protein_coding	117.087	-1.94987	0.070392
AT3G05500	protein_coding	1313.79	1.5553	0.0708349
AT1TE41625	Transposable_element	35.165	3.94722	0.0720103
AT1G61255	protein_coding	42.7998	2.96608	0.0728535
AT3G18590	protein_coding	124.747	2.58822	0.0740417
AT3G25495	pseudogene	93.2623	-3.10717	0.0762628
AT4G02250	protein_coding	320.985	2.70224	0.0764525
AT4G19520	protein_coding	52.3168	-3.2932	0.0790466
AT2G07798	protein_coding	201.454	-2.76747	0.080404
AT1G20693	protein_coding	3749.84	1.3036	0.0805898
AT4G04190	protein_coding	44.1602	2.82899	0.0808336
AT4G15850	protein_coding	70.6559	2.07035	0.0817202
AT3G57980	protein_coding	106.513	-3.77644	0.0839891
AT1G45229	protein_coding	23.6838	-4.5108	0.0842005
AT2G25964	protein_coding	102.298	-1.86086	0.0842741
AT1G32810	protein_coding	266.652	-1.73973	0.0844023
AT5G10946	protein_coding	42.182	-2.84774	0.0864186
AT3G27340	protein_coding	449.294	-1.50447	0.0871145
AT5G07530	protein_coding	8721.18	-2.6569	0.0879418
AT5G45540	protein_coding	21.2027	-4.20453	0.0879418
AT5G22460	protein_coding	182.12	2.44498	0.0881447
AT1G57777	protein_coding	55.3048	2.85563	0.0890946
AT2G40490	protein_coding	811.859	1.5443	0.0893908
AT4G15440	protein_coding	331.865	-1.73513	0.0893908
AT1G21050	protein_coding	76.2556	2.02689	0.0900795
AT4G22970	protein_coding	124.926	-2.51385	0.0916335
AT5G12960	protein_coding	401.465	-2.2227	0.0916335
AT5G22970	protein_coding	25.2275	3.54555	0.0921071
AT3G62420	protein_coding	2209.61	-1.47496	0.093201
AT3G62422	protein_coding	2209.61	-1.47496	0.093201
AT2G07786	pseudogene	969.199	-2.17774	0.093293
AT4G17030	protein_coding	32.4498	3.44015	0.093293
AT5G41740	protein_coding	68.4489	-3.24646	0.093293
AT1TE71905	Transposable_element	516.285	-1.66438	0.0933996
AT1G59730	protein_coding	21.3478	3.78349	0.0947185
AT5G46470	protein_coding	257.709	-2.26754	0.0947185
AT1G04340	protein_coding	517.671	1.46641	0.0955901
AT3G25700	protein_coding	53.5439	2.44879	0.0960334
AT1G26230	protein_coding	172.998	-2.21657	0.0962936
AT1TE28405	Transposable_element	66.3213	-3.45706	0.0963229
AT4G14103	protein_coding	25.1563	4.12607	0.09666
AT3G10010	protein_coding	271.588	-2.06193	0.0973488
AT1TE28460	Transposable_element	69.6928	-3.43636	0.0975225
AT2G38430	protein_coding	35.5898	2.85333	0.0996877
AT1G61563	protein_coding	1904.3	-2.20902	0.100278
AT1TE72010	Transposable_element	517.296	-1.66559	0.100548
AT3G49110	protein_coding	85.5341	3.08958	0.101949
ATCG00550	protein_coding	4140.42	3.26779	0.102071
AT3G03990	protein_coding	391.038	1.81689	0.102252
AT2G25850	protein_coding	273.386	-1.69924	0.102318
AT5G18600	protein_coding	257.519	2.29761	0.102738
AT1G61720	protein_coding	24.4265	3.64306	0.103388
AT5G57140	protein_coding	33.2847	-4.10296	0.103388
ATCG00490	protein_coding	201064	-2.06292	0.10358
AT1TE79940	Transposable_element	30.5559	-3.0591	0.104302
AT2G48060	protein_coding	404.415	-1.69982	0.104561
AT5G16550	protein_coding	396.564	1.58872	0.104561
AT1G26558	other_rna	846.775	-2.31317	0.104823
AT1G34825	protein_coding	15.9662	4.95959	0.104823
AT5G41790	protein_coding	574.246	-1.88412	0.104823
AT1G02816	protein_coding	292.925	1.80138	0.104824
AT1G74453	small_nucleolar_rna	43.6124	-2.86185	0.104824
AT1TE29570	Transposable_element	847.501	-2.31297	0.105205
AT5TE66565	Transposable_element	89.6708	-4.28948	0.106604
AT1G34820	protein_coding	16.0258	4.9138	0.112211
AT3G63445	other_rna	67.1154	-2.36935	0.112632
AT1G31340	protein_coding	2157.18	1.30944	0.11292
AT5G17890	protein_coding	243.588	-2.01777	0.11292
AT1G10320	protein_coding	52.6067	-3.25894	0.113512
AT5G22010	protein_coding	255.219	-1.9665	0.113916
AT3G56230	protein_coding	29.6316	2.57393	0.115649
AT4G33550	protein_coding	31.3408	3.38249	0.117969
AT1G32410	protein_coding	138.666	1.95477	0.118823
AT5G55890	protein_coding	15.4383	4.44188	0.119169
AT4G39420	protein_coding	499.853	-1.65177	0.119567
AT2G40390	protein_coding	17.1809	4.13362	0.119767
AT5G59320	protein_coding	22213.3	1.71473	0.119767
AT2G21655	protein_coding	60.6156	3.44486	0.119809
AT4G21660	protein_coding	787.978	-1.50695	0.120086
AT3G22600	protein_coding	116.794	2.82312	0.120491
AT5G20920	protein_coding	1933.48	1.46895	0.121927
AT1G01320	protein_coding	2867.75	-1.58278	0.122594
AT2G19810	protein_coding	202.179	2.34878	0.122594
AT4TE21115	Transposable_element	112.421	-3.00228	0.123393
AT5G42955	protein_coding	23.1667	3.39204	0.123514
AT5TE95125	Transposable_element	15.9577	-3.6726	0.124222
AT3G59580	protein_coding	27.0235	-4.06101	0.125757
AT1TE38210	Transposable_element	85.4981	-4.25523	0.127622
AT2G03140	protein_coding	340.624	-1.69684	0.127622
AT1G17640	protein_coding	42.2282	3.47101	0.129301
AT2G22650	protein_coding	107.343	-2.21003	0.129424
AT5G02160	protein_coding	1256.4	2.03569	0.129976
AT3G55970	protein_coding	124.335	2.73243	0.130456
AT5TE64220	Transposable_element	48.5156	-2.69245	0.13091
AT2G03750	protein_coding	412.87	1.80424	0.131855
AT1G61600	protein_coding	19.136	4.06021	0.132224
AT5G56010	protein_coding	6601.82	-1.70351	0.132224
AT4G04670	protein_coding	135.136	-2.13569	0.133112
AT1G25098	other_rna	7302.86	-1.61656	0.13337
AT5G40020	protein_coding	12.8187	3.83033	0.133495
AT5G47140	protein_coding	120.562	2.49854	0.134272
AT2TE00110	Transposable_element	93.5237	-4.08052	0.134772
AT1G67250	protein_coding	569.507	1.73263	0.135111
AT4G11653	protein_coding	21.8556	2.6912	0.135255
AT1G69410	protein_coding	1187.34	1.45764	0.13539
AT1G73730	protein_coding	195.641	1.82929	0.13539
AT4G01915	protein_coding	34.2823	-3.71093	0.13539
AT2G23470	protein_coding	25.8428	-3.76503	0.135667
AT2G40095	protein_coding	41.4243	-3.08241	0.137249
AT1G66830	protein_coding	10.4222	4.3063	0.138316
AT5G06120	protein_coding	254.313	-1.68771	0.139069
AT1G05460	protein_coding	189.145	-1.67489	0.139535
AT4G19200	protein_coding	1886.06	1.36851	0.139646
AT2G22030	protein_coding	16.897	-2.95148	0.141623
AT2G46240	protein_coding	602.902	-3.75181	0.141623
AT3G02870	protein_coding	372.046	1.96715	0.141623
AT2G32870	protein_coding	17.9023	4.06604	0.142768
AT1G21270	protein_coding	84.5881	-3.78883	0.142861
AT1G10710	protein_coding	12.4054	4.17028	0.142877
AT2G06200	protein_coding	49.3774	2.42936	0.142877
AT2G01980	protein_coding	67.6557	-3.17854	0.14306
AT5G09370	protein_coding	145.689	2.82003	0.14306
AT3G61160	protein_coding	322.452	-1.73829	0.145179
AT4G35770	protein_coding	165.769	3.15725	0.145385
AT5G37485	other_rna	14.7889	3.49573	0.145462
AT4G02510	protein_coding	1885.64	-1.62909	0.145629
AT2G22090	protein_coding	269.055	1.65341	0.147076
AT1G74055	protein_coding	53.3181	2.4842	0.148014
AT2G39681	other_rna	149.978	-1.80413	0.148014
AT2TE00075	Transposable_element	206.75	-4.33558	0.148113
AT5G66400	protein_coding	722.644	2.14001	0.14855
AT4G26555	protein_coding	331.101	-1.59359	0.14912
AT1G12320	protein_coding	93.6408	2.19699	0.14948
AT1G65070	protein_coding	131.519	-2.15367	0.149663
AT1G01810	protein_coding	14.446	3.26084	0.150714
AT5G48530	protein_coding	34.0617	-2.94101	0.152041
AT2G35384	small_nucleolar_rna	11.6487	-4.3772	0.153848
AT5G07740	protein_coding	252.07	-1.81296	0.154667
AT3G04140	protein_coding	31.7192	3.27752	0.15495
AT2TE20870	Transposable_element	125.391	-2.22967	0.156226
AT5G01630	protein_coding	71.6785	-3.87176	0.157334
AT4G15660	protein_coding	15.7192	4.20773	0.157516
ATCG01270	protein_coding	710.655	-3.55987	0.157516
AT3G05150	protein_coding	36.6497	2.58192	0.161292
AT3G30247	protein_coding	29.1755	2.89239	0.161292
AT5G17340	protein_coding	86.3377	2.37618	0.161292
AT3G21250	protein_coding	568.264	-1.67443	0.161295
AT3G57510	protein_coding	66.6997	2.9238	0.161303
ATCG00910	pre_trna	74.3647	-3.24883	0.161355
AT1TE40360	Transposable_element	73.3832	-3.02871	0.16139
AT3G03180	protein_coding	95.7372	2.75165	0.162107
AT5G67100	protein_coding	255.207	-1.91103	0.162107
ATCG00870	protein_coding	710.473	-3.55621	0.164253
AT4G36740	protein_coding	31.5564	3.00426	0.164658
AT1G49940	protein_coding	10.4668	-4.23632	0.164931
AT2G03870	protein_coding	754.182	1.33722	0.165871
AT1G50740	protein_coding	288.978	-1.80476	0.166167
AT1G26270	protein_coding	805.999	-1.46165	0.167162
AT3G06450	protein_coding	346.824	-1.54469	0.167162
AT3G24490	protein_coding	183.189	-1.91985	0.167162
AT4G37770	protein_coding	11.974	4.19049	0.167162
AT3G09010	protein_coding	27.4208	3.64435	0.167395
AT5G11850	protein_coding	196.21	-1.97001	0.167454
AT5G05790	protein_coding	29.2575	3.08693	0.167549
AT5G57565	protein_coding	42.8298	-2.92419	0.168513
AT5G39160	protein_coding	93.4269	2.43658	0.170038
AT1G18330	protein_coding	357.348	-1.98296	0.170946
AT5G43700	protein_coding	609.723	1.52905	0.171933
AT2G16790	protein_coding	21.2807	3.08461	0.172883
AT2G35340	protein_coding	220.817	-2.19713	0.173069
AT3G03030	protein_coding	36.2957	-2.56799	0.173164
AT3G49540	protein_coding	2161.71	-1.90415	0.173164
AT2G28910	protein_coding	1347.17	-1.56281	0.174619
AT3G20670	protein_coding	4666.26	1.30556	0.175797
ATMG00270	protein_coding	2927.04	-2.81226	0.175797
AT1TE08580	Transposable_element	19.8464	-2.88024	0.175947
AT3G12810	protein_coding	332.703	-2.38238	0.175947
AT5G35210	protein_coding	844.675	-1.53421	0.176724
AT5G42070	protein_coding	163.396	1.87018	0.177413
AT1G01305	protein_coding	20.223	2.93112	0.178017
AT3G62040	protein_coding	40.9869	3.31556	0.178017
AT1G07350	protein_coding	1164	-2.13965	0.179339
AT1G69750	protein_coding	150.456	-1.8913	0.180796
AT3G53830	protein_coding	69.8031	-2.17466	0.180796
AT5G63770	protein_coding	151.731	-1.93049	0.181602
AT5G17980	protein_coding	59.0794	3.25559	0.182946
AT1G62820	protein_coding	551.885	1.49701	0.183449
AT2G36420	protein_coding	496.169	-1.77264	0.183578
AT4G00060	protein_coding	221.926	-1.69716	0.184871
AT1TE74005	Transposable_element	40.1513	-3.75854	0.184967
AT3G13277	other_rna	51.8193	-3.53798	0.184967
AT5G10330	protein_coding	268.547	1.832	0.185773
AT1G64100	protein_coding	57.0027	2.29755	0.189197
AT5G62470	protein_coding	364.801	1.63541	0.189578
ATMG01110	protein_coding	37.088	-4.03202	0.191484
AT3G15620	protein_coding	38.1047	-3.17595	0.192014
AT4G18980	protein_coding	73.278	2.22584	0.192271
AT5G46520	protein_coding	312.561	-2.06485	0.192525
AT4G24540	protein_coding	49.1662	-3.71707	0.198415
AT1G64470	protein_coding	47.1987	-3.7882	0.198608
ATCG01220	pre_trna	73.5277	-3.19009	0.198925
AT2G40435	protein_coding	30.7102	4.04068	0.20055
AT3G07050	protein_coding	225.49	-2.22104	0.200999
AT3G17710	protein_coding	26.1715	3.03673	0.200999
AT2G18550	protein_coding	17.0957	3.80532	0.201876
AT4G26830	protein_coding	25.2134	3.65956	0.202303
AT1G64570	protein_coding	163.81	-2.67488	0.203909
AT2G34357	protein_coding	525.109	-1.92335	0.204006
AT5G01595	other_rna	88.9282	-1.88871	0.204478
AT3G48650	pseudogene	28.2651	-2.80675	0.204788
AT5G15780	protein_coding	1615.23	-1.35955	0.206273
AT3G26860	protein_coding	234.229	2.50829	0.207464
ATCG00250	pre_trna	183.672	-3.42173	0.207773
AT2G30070	protein_coding	123.157	-2.04897	0.210538
AT1G68720	protein_coding	332.517	-1.64612	0.213517
AT3G57690	protein_coding	2587.75	-1.98136	0.214915
AT4G32960	protein_coding	66.1458	2.63151	0.216299
AT3G56610	protein_coding	24.9916	3.66886	0.216608
AT4G19100	protein_coding	406.325	1.94323	0.216608
AT5G19260	protein_coding	50.3617	2.26264	0.216677
ATCG01300	protein_coding	1611.75	-2.41398	0.220864
AT3G10113	protein_coding	35.589	-2.74064	0.222881
AT1G06265	other_rna	35.5378	-2.60663	0.223536
AT4G16680	protein_coding	76.2288	-3.22089	0.224051
AT3G15670	protein_coding	45.481	3.33939	0.224301
AT5G14130	protein_coding	13.0042	3.89566	0.224301
AT5G66210	protein_coding	320.661	-1.5561	0.224301
AT4G23220	protein_coding	22.1671	-3.97067	0.226711
ATCG00530	protein_coding	2069.57	-2.12322	0.227763
AT1G35160	protein_coding	6963.42	1.15535	0.228144
AT1G47580	protein_coding	46.9889	2.58731	0.228144
AT1G65280	protein_coding	119.481	-1.8605	0.230449
AT1G03730	protein_coding	382.119	1.60783	0.23177
AT2G20720	protein_coding	23.7292	-3.11767	0.23177
AT2G42365	other_rna	15.6621	-3.53843	0.23177
AT5G67520	protein_coding	48.5155	2.37153	0.23177
AT3G59320	protein_coding	63.1569	-2.5286	0.233201
AT2G36730	protein_coding	24.9335	-2.90613	0.234503
AT5G03830	protein_coding	46.4516	-2.5484	0.234503
ATMG00060	protein_coding	2722.91	-2.33786	0.234503
AT1G30810	protein_coding	183.991	-1.60992	0.237582
AT4G12990	protein_coding	25.4208	-3.32759	0.237582
AT5G04520	protein_coding	28.6393	3.40684	0.23849
AT2G19970	protein_coding	10.6396	3.65263	0.240784
AT1G76740	protein_coding	97.6514	-3.00722	0.241507
AT2G41510	protein_coding	17.9862	-3.50974	0.241507
AT2G32120	protein_coding	680.611	-2.30445	0.241591
AT2G35747	small_nucleolar_rna	38.5951	-3.61618	0.242691
AT5G45840	protein_coding	67.3927	-2.53854	0.242691
AT3G11450	protein_coding	633.65	-1.4066	0.246608
AT2G07771	protein_coding	379.36	-2.72403	0.247422
AT4G18630	protein_coding	25.6383	3.38316	0.247422
AT1G34805	protein_coding	11.6429	4.4863	0.247756
ATMG00900	protein_coding	385.357	-2.72355	0.247756
AT1G77310	protein_coding	39.1373	-2.73364	0.25038
AT5G22760	protein_coding	409.647	-1.53033	0.25044
AT1G20510	protein_coding	562.745	-2.32015	0.252555
AT3G59310	protein_coding	101.976	-1.73336	0.253011
AT3G20760	protein_coding	3432.23	-2.01386	0.253639
AT3G28350	pseudogene	13.9883	-3.62508	0.254504
ATCG00840	protein_coding	1605.1	-2.3782	0.254504
AT1G59980	protein_coding	47.4671	-3.73844	0.255772
AT2TE00015	Transposable_element	232.347	-3.99781	0.255772
AT3G12143	pseudogene	42.2595	-2.36924	0.255772
AT2G02160	protein_coding	386.175	-1.52591	0.256251
AT1G75300	protein_coding	176.447	1.74735	0.262749
AT3G05250	protein_coding	38.6702	-2.42154	0.263828
AT2G27150	protein_coding	128.873	-2.29687	0.264701
AT4G13495	other_rna	47.766	-3.44477	0.266616
AT5G06430	protein_coding	108.216	1.86239	0.266616
AT3G07520	protein_coding	28.1889	-3.09545	0.266896
AT4G36690	protein_coding	1068.6	-1.40316	0.266896
AT3G57060	protein_coding	266.654	-1.57672	0.267712
AT5G27490	protein_coding	64.0984	1.9685	0.267809
AT5G42567	protein_coding	96.9434	2.52388	0.267809
AT5G46460	protein_coding	46.129	-2.59997	0.268371
AT5G64040	protein_coding	6736.16	1.37392	0.268371
AT5G13270	protein_coding	52.4941	-3.15717	0.269004
AT5G11900	protein_coding	1021.58	1.43284	0.270079
AT5G02460	protein_coding	42.0931	2.72926	0.271506
AT1TE78160	Transposable_element	63.1946	-3.06905	0.272217
AT5G55980	protein_coding	10.1595	3.44241	0.272217
AT2G03050	protein_coding	94.1432	1.91406	0.273589
AT5TE72360	Transposable_element	71.2972	3.44991	0.273589
AT5G43140	protein_coding	65.8196	2.09108	0.273868
AT5G38310	protein_coding	23.7835	2.8672	0.27468
AT3G05670	protein_coding	235.751	-1.53807	0.275608
AT1G30860	protein_coding	18.06	3.27894	0.276396
AT4G29480	protein_coding	802.174	1.58972	0.276396
AT5TE66250	Transposable_element	95.8453	-2.28952	0.276396
AT5G10950	protein_coding	237.595	-1.72196	0.277302
AT1G07750	protein_coding	1204.21	1.52271	0.277664
ATCG01180	ribosomal_rna	185706	-2.70879	0.277664
AT3G49142	protein_coding	21.761	-3.08597	0.277961
AT4G00880	protein_coding	77.4052	2.52999	0.278205
AT5G14280	protein_coding	244.342	2.33758	0.278205
AT1G35710	protein_coding	257.843	-2.93733	0.278208
AT2G07664	pseudogene	35.6554	-2.90974	0.278208
AT2TE15160	Transposable_element	44.8252	-3.06429	0.278208
AT3G19380	protein_coding	23.0838	2.85561	0.278208
ATMG01410	protein_coding	22.3902	-3.43413	0.278208
AT1G24625	protein_coding	42.6632	2.53317	0.278735
AT1G56510	protein_coding	113.204	-1.89339	0.278735
AT1G77500	protein_coding	129.557	-2.06783	0.283236
AT2G47800	protein_coding	443.877	-1.63749	0.287949
AT3G61230	protein_coding	114.414	1.73081	0.288391
AT2G07734	protein_coding	1818.83	-1.62994	0.2893
AT5TE54905	Transposable_element	119.62	-3.12826	0.293379
AT1G73310	protein_coding	28.7451	-3.6197	0.293521
AT4G17610	protein_coding	125.988	-2.32112	0.293598
AT3G12370	protein_coding	758.813	1.41929	0.294032
AT1G06410	protein_coding	906.544	-1.63181	0.295243
AT2G04033	pseudogene	20.4081	3.82735	0.296494
AT1G77330	protein_coding	17.9657	3.23635	0.29665
AT5TE51725	Transposable_element	12.3103	4.41118	0.297864
AT1G03080	protein_coding	943.977	-1.56058	0.298536
AT1G04600	protein_coding	33.5285	-2.72842	0.30281
AT1G13410	protein_coding	19.692	-3.88364	0.303449
AT3G19550	protein_coding	181.017	2.05257	0.303449
ATCG00950	ribosomal_rna	175484	-2.69506	0.304121
AT2G43310	protein_coding	17.0136	3.53219	0.304814
AT5G62080	protein_coding	1156.64	1.77054	0.304814
AT1G26450	protein_coding	239.48	1.80241	0.304906
AT1G55980	protein_coding	62.96	-3.27527	0.305236
AT3G50410	protein_coding	150.406	1.71439	0.306138
AT3G08720	protein_coding	133.512	-2.12206	0.306593
AT1G07520	protein_coding	144.078	-1.80235	0.307083
AT1G67650	protein_coding	30.432	-3.17905	0.307083
AT4G32510	protein_coding	78.6929	-2.17113	0.307561
AT1G62085	protein_coding	46.556	2.66212	0.30826
AT1G08060	protein_coding	356.608	-1.68018	0.310092
AT2G45790	protein_coding	472.118	1.80009	0.310092
AT1G67140	protein_coding	546.584	-1.82911	0.310329
AT4G11010	protein_coding	1318.11	1.39352	0.310329
AT3G59030	protein_coding	10.1002	3.54715	0.311247
AT5G64667	protein_coding	19.8698	2.87219	0.313347
AT5G46315	small_nuclear_rna	18.7994	-3.28782	0.314971
AT3G17060	protein_coding	678.883	2.44692	0.316821
AT3G61898	protein_coding	25.2256	-2.96377	0.317922
AT4TE33205	Transposable_element	13.1294	-3.48501	0.317922
AT4G38950	protein_coding	518.908	-1.66354	0.317939
ATMG00310	protein_coding	52.6801	-2.98692	0.321366
AT5G53440	protein_coding	257.984	-1.57268	0.323042
AT1TE93240	Transposable_element	17.6148	-3.49485	0.323092
AT1G45010	protein_coding	192.894	2.23062	0.323231
AT1G68990	protein_coding	258.34	-1.85329	0.323231
AT3G22690	protein_coding	26.0679	-3.6193	0.323231
AT4TE22885	Transposable_element	75.684	-1.92209	0.323231
AT5TE62740	Transposable_element	12.3221	3.25461	0.323231
AT1G03410	protein_coding	84.8636	-2.06087	0.324796
AT2G24755	other_rna	169.024	-2.58976	0.324796
AT4G12450	protein_coding	14.5386	3.40855	0.324796
AT5TE45925	Transposable_element	19.005	-3.89445	0.324796
AT1G08260	protein_coding	375.298	-1.80797	0.324879
AT4G21895	protein_coding	57.7991	-2.18019	0.324879
AT1G34315	protein_coding	15.2252	-2.70314	0.327544
AT1G64720	protein_coding	1322.75	-1.58134	0.327544
AT1TE05870	Transposable_element	29.8392	-2.98515	0.327544
AT2G20597	protein_coding	17.473	2.95989	0.327544
AT3G56250	protein_coding	10.0795	3.75182	0.327544
AT5G46230	protein_coding	22.2555	3.68381	0.327544
AT4G23420	protein_coding	896.895	-2.28329	0.331032
AT5G45430	protein_coding	1032.68	-1.49273	0.331032
ATCG00350	protein_coding	42895.2	-1.9802	0.331032
AT5TE81560	Transposable_element	33.4618	2.28194	0.331206
AT3G07750	protein_coding	84.8512	2.16759	0.332489
AT2G40711	protein_coding	11.39	-3.40751	0.333158
ATCG00920	ribosomal_rna	20151	-2.99638	0.333158
AT2G04865	protein_coding	172.956	-2.01109	0.334007
AT3G08820	protein_coding	17.9888	-3.62165	0.334007
AT5G17900	protein_coding	288.777	-1.77972	0.334007
AT5G24030	protein_coding	93.3447	-1.93572	0.334007
AT1G32700	protein_coding	327.649	1.62408	0.334977
AT2G07753	pre_trna	29.7619	-2.39323	0.335963
AT5G16540	protein_coding	180.039	-2.00756	0.335963
AT1G23040	protein_coding	949.737	1.55912	0.338855
AT3G28140	protein_coding	622.562	1.41774	0.338855
AT4G32700	protein_coding	154.297	-2.55286	0.338855
AT4G39510	protein_coding	226.545	1.81623	0.338855
AT5G20360	protein_coding	214.727	-1.66488	0.339371
AT5G23250	protein_coding	356.523	1.66005	0.340477
AT3G22160	protein_coding	29.8291	2.92374	0.340894
AT1G80980	protein_coding	250.312	-1.81686	0.340953
AT4G00895	protein_coding	1533.63	1.46301	0.340953
AT5G09810	protein_coding	15112	1.49565	0.340953
AT5G45428	protein_coding	1031.82	-1.48857	0.340953
AT2G26355	other_rna	120.441	-2.07446	0.341598
AT3G54020	protein_coding	181.197	-2.05682	0.341598
AT5G49920	protein_coding	121.106	-2.05339	0.341598
ATCG01210	ribosomal_rna	21237.2	-2.992	0.341598
AT3G15030	protein_coding	357.405	-1.65402	0.343011
AT1G62780	protein_coding	367.453	2.04861	0.34302
AT1G11593	protein_coding	10.9504	3.63728	0.344618
AT1G20190	protein_coding	863.812	1.64345	0.344618
AT4G15700	protein_coding	17.0923	3.44019	0.344618
AT5G25890	protein_coding	317.725	1.40049	0.344618
AT1G26150	protein_coding	143.025	-2.12994	0.344922
AT5G55880	protein_coding	14.2602	3.90363	0.348064
AT4G37820	protein_coding	187.208	-1.92494	0.350008
AT1G67290	protein_coding	536.091	2.14243	0.350114
AT2G48090	protein_coding	35.9754	2.2271	0.350546
AT1G21310	protein_coding	257.853	-2.33555	0.351221
AT1G32560	protein_coding	17.4249	2.97945	0.351221
AT3G46658	other_rna	18.2294	-3.39654	0.351221
AT4G13494	mirna	11.7584	-3.64081	0.351811
AT4G13720	protein_coding	151.89	1.56776	0.351811
AT5G46990	protein_coding	22.632	2.6943	0.352565
AT2G26850	protein_coding	170.213	-1.89592	0.352815
AT2G25080	protein_coding	809.156	1.54723	0.353646
AT2G24860	protein_coding	199.761	1.84546	0.35365
AT4G00530	protein_coding	79.257	1.71732	0.35365
AT5G09450	protein_coding	146.171	2.08705	0.354059
AT3G29797	protein_coding	33.0118	2.43854	0.358337
AT4G30100	protein_coding	525.384	-1.53396	0.362439
AT5G53510	protein_coding	43.3119	2.92699	0.362439
AT1G03743	small_nucleolar_rna	14.4388	-3.89101	0.365216
AT3G28580	protein_coding	22.3081	-2.54246	0.365981
AT1TE42210	Transposable_element	385.311	-1.83607	0.366515
AT3G17611	protein_coding	801.137	-1.60138	0.366515
AT3G57300	protein_coding	620.634	-1.54589	0.366905
AT5G45775	protein_coding	2751.19	1.34685	0.366905
AT1G54260	protein_coding	74.4976	-3.10658	0.367666
AT1G61730	protein_coding	829.126	1.7147	0.370169
ATMG01200	protein_coding	3190.99	-2.16532	0.370169
ATMG00780	pre_trna	162.598	-2.17203	0.370545
AT1G71692	protein_coding	12.9775	3.02104	0.371042
AT4G24972	protein_coding	40.7049	-2.64007	0.371042
AT3G20820	protein_coding	3570.63	1.66068	0.371207
ATCG00810	protein_coding	3915.78	-1.9171	0.371207
ATCG00050	protein_coding	148.116	-3.07362	0.373938
AT5G09680	protein_coding	178.026	1.8026	0.374411
AT3G14230	protein_coding	1581.06	1.31762	0.376094
AT5G65207	protein_coding	61.1639	2.10381	0.376094
AT1TE17030	Transposable_element	45.0958	3.49405	0.37748
AT1TE56785	Transposable_element	78.1529	3.18087	0.379447
AT2G27130	protein_coding	227.986	1.52831	0.379447
AT5G53800	protein_coding	161.241	-1.65171	0.379447
AT5G47350	protein_coding	23.2896	2.98496	0.379808
AT3G17080	protein_coding	11.6555	4.02918	0.380012
AT1G70610	protein_coding	168.691	-2.1063	0.380026
AT3G61760	protein_coding	33.0746	3.27244	0.381122
AT4G34310	protein_coding	154.202	-1.90334	0.382982
AT3G51400	protein_coding	82.6398	2.05088	0.385323
ATMG00330	pre_trna	186.273	-2.12222	0.385344
AT3G02760	protein_coding	913.584	-1.39953	0.3868
AT1G08930	protein_coding	247.371	-2.40262	0.389764
AT1G62370	protein_coding	166.967	1.93327	0.390633
AT4G27740	protein_coding	77.0734	1.95427	0.391356
AT3G56570	protein_coding	42.4531	-2.53004	0.392583
AT4G08580	protein_coding	160.277	-1.65144	0.393927
AT1G73260	protein_coding	11.5528	3.75587	0.394832
AT3G02990	protein_coding	45.152	3.44822	0.395802
AT4TE08440	Transposable_element	33.6214	-3.64235	0.396602
AT5G24350	protein_coding	456.645	-2.01666	0.396602
AT2G07677	pseudogene	125.022	-2.0062	0.397332
AT3G13890	protein_coding	20.2701	-3.69194	0.397332
AT5G52280	protein_coding	389.09	-1.63055	0.397332
AT2TE07550	Transposable_element	61.0824	-3.39251	0.397854
ATMG00650	protein_coding	1448.7	-3.06522	0.398134
AT2G47670	protein_coding	29.5358	2.48825	0.399401
AT3G47680	protein_coding	143.817	-2.41313	0.400528
AT3G51830	protein_coding	175.064	-1.81028	0.402825
AT3G52710	protein_coding	43.7533	2.71061	0.403807
AT1G13145	pseudogene	37.6975	-2.63687	0.405238
AT1G72440	protein_coding	632.48	-1.71507	0.40589
AT4G17690	protein_coding	20.8069	3.33349	0.40589
AT3G50380	protein_coding	440.668	-2.16455	0.405999
AT1G27600	protein_coding	143.271	-1.87932	0.406349
AT3G21420	protein_coding	132.435	1.78581	0.406349
AT5G54180	protein_coding	74.2686	-2.21007	0.407165
ATMG00790	pre_trna	30.3768	-2.35568	0.407165
AT1G61890	protein_coding	814.094	-1.77468	0.408017
AT1G22882	protein_coding	303.805	-1.70565	0.41205
AT2G01450	protein_coding	1981.51	-1.30486	0.412971
AT2G01021	protein_coding	736.307	-2.47646	0.413485
AT5G18290	protein_coding	83.3995	1.92472	0.413485
AT2G44790	protein_coding	110.077	1.71263	0.416432
AT1G60390	protein_coding	155.583	2.0067	0.417819
AT3G41979	ribosomal_rna	2030.6	-3.10201	0.417819
AT1G75860	protein_coding	326.582	-1.50227	0.418078
AT3G30385	protein_coding	219.162	2.33654	0.418078
AT5G15910	protein_coding	177.909	1.63717	0.418078
AT2G02010	protein_coding	50.7915	3.04433	0.418247
AT2G07773	protein_coding	174.185	-2.88111	0.418247
AT2G19710	protein_coding	139.067	-1.70205	0.419521
AT1G05580	protein_coding	288.157	-2.2065	0.41989
AT1G60890	protein_coding	240.837	-1.6692	0.419942
AT1G69210	protein_coding	30.4045	2.94814	0.419942
AT3G27410	protein_coding	17.7248	2.42175	0.419942
AT1G09250	protein_coding	115.621	1.69692	0.421232
AT1G47380	protein_coding	161.97	-1.81582	0.422138
AT2G15980	protein_coding	33.3834	-3.06641	0.422138
AT2G20723	small_nucleolar_rna	24.1559	-3.47743	0.422138
AT3G17030	protein_coding	34.9475	3.41717	0.422138
AT5G44170	protein_coding	141.006	1.93016	0.422878
AT4G05220	protein_coding	11.6862	3.22319	0.422994
AT4G24060	protein_coding	503.56	1.43472	0.424722
ATMG00290	protein_coding	1704	-1.58665	0.424722
ATMG00490	protein_coding	469.082	-2.41321	0.424722
AT5G24910	protein_coding	55.856	3.40094	0.42537
AT2G07795	protein_coding	60.2618	-3.11219	0.425457
AT4G37580	protein_coding	27.0127	2.72026	0.426197
AT5G54569	other_rna	25.597	-2.63496	0.427434
AT1G70320	protein_coding	1912.43	-1.43161	0.428716
AT3TE43610	Transposable_element	32.5589	-3.41849	0.428716
AT5G48480	protein_coding	3161.21	1.36774	0.429367
AT5G03120	protein_coding	71.1409	2.11137	0.429988
AT5TE35210	Transposable_element	26.7103	3.5957	0.429988
AT2G43375	other_rna	323.534	-2.14714	0.432642
AT2G26340	protein_coding	221.462	1.65382	0.434179
AT5G43285	protein_coding	11.8975	3.184	0.435698
AT3G21755	other_rna	56.7173	-2.81773	0.436435
AT5G49520	protein_coding	79.7911	-1.84715	0.437893
AT5G26060	protein_coding	51.1942	-1.89778	0.438332
AT5G54280	protein_coding	233.826	-2.04696	0.439079
AT3G24510	protein_coding	19.0294	2.7593	0.439367
AT5G44260	protein_coding	127.285	1.92333	0.439367
AT5G01100	protein_coding	51.4236	-1.93867	0.439647
AT3G19350	protein_coding	10.2617	3.83192	0.440075
AT5G47455	protein_coding	208.972	1.49522	0.440075
AT4G40030	protein_coding	8558.16	1.24244	0.441462
AT4G32490	protein_coding	14.7048	3.11426	0.445422
AT4TE83080	Transposable_element	13.8017	-3.29323	0.447355
AT4G36515	protein_coding	109.145	-1.88749	0.449683
AT3G13720	protein_coding	480.619	1.56776	0.449939
AT5G42670	protein_coding	121.493	-1.77637	0.451022
AT1G50830	protein_coding	47.1603	-2.901	0.452508
AT2G37290	protein_coding	21.7233	-2.83955	0.452508
AT4G25040	protein_coding	942.308	1.71494	0.452508
AT5G55040	protein_coding	489.067	-1.36216	0.452508
AT4G37530	protein_coding	32.9422	2.2467	0.454167
AT1G06460	protein_coding	798.27	1.64863	0.461878
AT5G22700	protein_coding	106.598	-2.06373	0.461878
AT4G11670	protein_coding	156.796	-2.02335	0.462902
AT1G69580	protein_coding	70.1388	2.66369	0.463885
AT3G27400	protein_coding	41.5722	2.66063	0.463885
AT5G25060	protein_coding	331.465	-1.55121	0.463885
AT1G26235	other_rna	17.4795	-3.46256	0.466945
AT5G46910	protein_coding	167.668	-1.84755	0.466949
AT3TE70785	Transposable_element	10.3004	-3.52858	0.468838
AT3G11250	protein_coding	2932.66	1.38464	0.472018
AT4G36470	protein_coding	36.6017	3.14209	0.472674
AT5G17160	protein_coding	214.262	-1.69978	0.473411
AT3G12050	protein_coding	834.419	-1.67308	0.473874
AT1G73805	protein_coding	51.2253	-3.24175	0.478232
AT3G30387	protein_coding	216.043	2.32278	0.480393
AT5G14080	protein_coding	84.1408	-1.98874	0.482385
AT5G45276	pseudogene	17.0752	-3.37157	0.482385
AT2G39580	protein_coding	358.428	-1.77356	0.484149
AT3G12180	protein_coding	299.437	1.57233	0.485856
AT5G63087	protein_coding	14.9049	2.51436	0.485856
AT2G16910	protein_coding	181.937	-2.06452	0.486647
AT5G65460	protein_coding	195.712	-2.32843	0.493028
AT1G74440	protein_coding	135.221	-1.82935	0.494568
AT2G17930	protein_coding	1155.96	-1.76342	0.494568
AT5G40780	protein_coding	141.791	1.92309	0.494648
AT5G12000	protein_coding	175.382	-2.06981	0.494906
AT1G55970	protein_coding	109.154	-2.44756	0.499258
AT2G39360	protein_coding	99.9869	-1.69242	0.499371
AT4G26455	protein_coding	138.768	-1.70969	0.499371
AT5G62350	protein_coding	2903.54	1.70061	0.500309
AT3G05130	protein_coding	59.6471	-2.18739	0.504868
AT5G17460	protein_coding	225.789	1.77531	0.505162
AT1G26920	protein_coding	240.666	1.85558	0.505459
AT3G01345	protein_coding	1117.36	-1.50396	0.505652
AT3G16890	protein_coding	27.523	-2.91764	0.505652
AT3G17712	protein_coding	87.7319	-2.26205	0.505652
AT3G27360	protein_coding	2210.58	1.40027	0.505652
AT3TE43615	Transposable_element	80.3148	-2.11877	0.505652
AT4G12680	protein_coding	45.8135	-1.98834	0.505652
AT5G14360	protein_coding	19.9754	2.84105	0.505652
AT5G27495	protein_coding	26.4404	3.55799	0.505652
AT5G38330	protein_coding	20.4893	2.48346	0.505652
AT1G48940	protein_coding	101.98	2.36409	0.506726
AT5G14565	mirna	25.4824	-2.35844	0.506726
AT5G15700	protein_coding	123.358	-1.84437	0.506726
AT2G03450	protein_coding	44.2192	1.89863	0.507956
AT5G58900	protein_coding	32.9216	3.02007	0.507956
AT3G26280	protein_coding	18.9344	3.48666	0.508545
AT5G12180	protein_coding	103.743	-2.31317	0.509475
AT2G33815	other_rna	11.6593	-2.8834	0.511564
AT1G23050	protein_coding	61.262	2.24505	0.514112
ATCG00890	protein_coding	4820.19	-2.75214	0.514112
AT1G12620	protein_coding	60.9323	2.72139	0.515897
AT1G12010	protein_coding	53.5344	3.22015	0.516789
AT2G41340	protein_coding	34.4994	-2.49773	0.517764
AT2G32140	protein_coding	87.3388	-2.0434	0.518814
AT4G14365	protein_coding	110.674	-1.86175	0.518814
AT3G07270	protein_coding	352.109	1.50776	0.519179
AT2G36325	protein_coding	29.0838	2.06254	0.519229
AT5G55170	protein_coding	58.9022	1.82151	0.519229
AT5TE38720	Transposable_element	45.4717	-3.34938	0.522749
AT2G42640	protein_coding	42.9804	-2.98645	0.524062
AT3G10150	protein_coding	37.9171	2.57678	0.524062
AT5G11250	protein_coding	83.2608	-2.54958	0.525459
AT4G17350	protein_coding	44.6622	2.71845	0.528159
ATCG00940	pre_trna	4589.43	-2.0345	0.528941
AT1G15002	other_rna	326.445	-3.5778	0.530719
AT1G31240	protein_coding	16.1887	-2.97002	0.532155
AT3G22240	protein_coding	1008.14	2.45354	0.532155
AT5G37780	protein_coding	2988.17	1.39044	0.532155
AT5G23380	protein_coding	91.2185	-1.72206	0.533647
AT1TE28330	Transposable_element	33.246	-3.06194	0.533801
AT1TE78490	Transposable_element	38.7937	-3.04457	0.535141
AT3G46385	pseudogene	85.8455	-1.74414	0.536537
AT3TE64400	Transposable_element	11.7938	-3.48759	0.536537
AT4G17098	other_rna	19.3647	-3.32341	0.536537
AT1TE35540	Transposable_element	43.7254	-2.84781	0.536611
AT5G19190	protein_coding	69.8568	2.41292	0.536611
AT2G07751	protein_coding	895.356	-1.54395	0.53688
AT2G30060	protein_coding	1217.77	1.33161	0.537832
AT3G27260	protein_coding	374.62	-1.68826	0.537832
AT4G16770	protein_coding	74.7941	1.77718	0.539344
AT1G03790	protein_coding	13.7383	3.0555	0.546192
AT1G11120	protein_coding	44.1511	2.62295	0.546192
AT5G13840	protein_coding	135.943	-2.30949	0.546192
AT2G07706	protein_coding	260.811	-1.72864	0.548632
AT2G25610	protein_coding	659.703	1.55368	0.548794
AT1TE28510	Transposable_element	36.6454	-3.01395	0.551642
AT4G12850	protein_coding	37.805	2.30732	0.551642
ATCG00100	pre_trna	2744.59	-3.0975	0.551642
AT4G30060	protein_coding	43.6988	-2.90634	0.554764
AT2G15535	protein_coding	18.9883	2.46583	0.556385
AT3G14450	protein_coding	23.5414	3.58846	0.556385
AT2G36470	protein_coding	40.1781	2.73475	0.559107
AT4G36988	protein_coding	161.326	-2.31153	0.559303
AT4G36990	protein_coding	161.326	-2.31153	0.559303
AT2G29400	protein_coding	633.392	-1.4109	0.568204
AT1TE37075	Transposable_element	63.3441	-3.37034	0.573857
AT2G38120	protein_coding	1376.59	1.53383	0.573857
AT4G08869	protein_coding	39.2081	2.95223	0.573857
AT4G10940	protein_coding	36.5163	-2.78191	0.573857
AT4TE23715	Transposable_element	39.2081	2.95223	0.573857
AT5G10390	protein_coding	2946.11	1.38803	0.573857
AT5G20300	protein_coding	189.5	-1.74594	0.573857
AT5G48610	protein_coding	139.331	-1.7651	0.573857
AT5TE24030	Transposable_element	20.0061	-3.19142	0.573857
AT1G59700	protein_coding	283.734	1.43278	0.574007
AT3G07340	protein_coding	212.085	-1.49473	0.574007
AT2G30500	protein_coding	472.167	-1.54215	0.574395
AT1G35530	protein_coding	137.309	-2.28694	0.577125
ATMG00990	protein_coding	907.811	-1.60035	0.577125
AT5G04020	protein_coding	171.263	-1.86965	0.581721
AT1G03935	small_nucleolar_rna	29.0456	-2.32739	0.582292
AT1G36150	protein_coding	89.3317	2.0418	0.582292
AT1G67830	protein_coding	346.638	1.4483	0.582292
AT5G43510	protein_coding	51.1342	2.1938	0.582292
AT2G43141	small_nucleolar_rna	10.4109	-3.59559	0.583923
AT1G53170	protein_coding	63.5281	1.94967	0.583963
AT4G35630	protein_coding	859.642	1.38351	0.586222
AT5G40390	protein_coding	59.275	2.18785	0.586523
AT2G35210	protein_coding	45.5908	2.25513	0.587235
AT3G58193	small_nucleolar_rna	16.9744	-2.74005	0.587629
AT4G38770	protein_coding	11372.4	-1.65039	0.5881
AT5G39310	protein_coding	41.5442	2.37331	0.588598
AT5G63320	protein_coding	250.019	-1.59812	0.588598
AT5TE17350	Transposable_element	99.3135	-2.11019	0.588598
AT4G12720	protein_coding	1118.56	-1.66855	0.595194
AT5G24240	protein_coding	180.215	-1.86804	0.596152
AT3G03800	protein_coding	40.5471	-2.57865	0.596728
AT3G48810	protein_coding	33.1741	-2.94197	0.596865
AT4G16860	protein_coding	488.84	-1.78389	0.598857
AT5G56030	protein_coding	10026.1	-1.55186	0.600163
AT5TE24045	Transposable_element	14.4842	-3.59969	0.600163
AT1G06560	protein_coding	182.141	-1.63458	0.600697
AT5G36002	other_rna	43.8588	-2.36025	0.601965
AT4G18170	protein_coding	20.543	3.29058	0.602742
AT2G25810	protein_coding	26.5078	3.26267	0.603499
AT1G68765	protein_coding	19.2764	3.64527	0.605744
AT3G50240	protein_coding	255.912	-1.66866	0.605744
AT4G38330	protein_coding	27.6972	-2.66859	0.608113
AT3G45870	protein_coding	21.338	-2.66435	0.609193
AT5G14840	pseudogene	117.942	-2.0863	0.609193
AT1G64572	other_rna	57.7092	-1.74417	0.609228
AT1G66480	protein_coding	19.458	2.79281	0.610861
AT4G13261	protein_coding	31.8175	2.13064	0.610861
AT4G28703	protein_coding	15.85	3.00132	0.610861
AT5G15450	protein_coding	756.704	-1.60273	0.610861
AT1TE62440	Transposable_element	27.7401	-3.45984	0.611558
AT2G01020	ribosomal_rna	1944.03	-2.96848	0.612836
AT5G58530	protein_coding	71.3864	2.16556	0.612836
AT1G53070	protein_coding	2245.52	1.31981	0.613731
AT2G42110	protein_coding	45.2413	2.33372	0.613731
AT5G49910	protein_coding	1989.05	-1.31885	0.613731
AT4TE06580	Transposable_element	30.5066	-2.27354	0.613846
AT2G47860	protein_coding	23.8166	-3.46367	0.616137
AT4G34390	protein_coding	252.055	-1.43174	0.616508
AT1G11700	protein_coding	207.97	1.71572	0.617068
AT5G56860	protein_coding	179.288	1.82828	0.618721
AT1G54200	protein_coding	74.5021	1.71399	0.623035
AT2G38185	protein_coding	35.1523	-2.33217	0.623035
AT1G50180	protein_coding	13.386	-3.14387	0.623879
AT1G29465	protein_coding	135.366	-1.62793	0.627044
AT3G08010	protein_coding	390.259	1.47608	0.628208
AT1G23570	protein_coding	219.934	-2.02185	0.630351
AT3G54240	protein_coding	63.328	1.71148	0.636141
AT4G17085	protein_coding	227.387	-1.48704	0.636141
AT5G10290	protein_coding	147.564	-1.64447	0.636141
AT1G64628	protein_coding	170.916	-1.75374	0.638235
AT1G64630	protein_coding	170.916	-1.75374	0.638235
AT1TE82210	Transposable_element	16.2452	2.96517	0.638235
AT1G77890	protein_coding	69.6214	-2.06662	0.638778
AT1G78180	protein_coding	74.6917	2.14827	0.638778
AT4G01593	other_rna	65.7067	-2.34313	0.64061
AT5G02040	protein_coding	260.883	1.5655	0.640647
AT5G27890	protein_coding	39.2397	-2.14967	0.640896
AT4TE67490	Transposable_element	61.57	-2.04908	0.641234
AT4G01840	protein_coding	77.1775	1.72756	0.641964
AT5G45730	protein_coding	15.721	3.00811	0.641964
AT2G10735	pseudogene	11.5017	-3.39053	0.644905
AT2G26440	protein_coding	265.122	1.8235	0.644905
AT5G36120	protein_coding	1476.68	1.40544	0.64622
AT5G53290	protein_coding	24.4939	2.58525	0.646855
ATCG00030	pre_trna	6566.05	-1.79176	0.651671
AT1G34095	protein_coding	56.7007	-2.87147	0.656281
AT5G60800	protein_coding	816.108	-1.54566	0.656281
AT1G32550	protein_coding	242.679	1.69276	0.657783
AT1TE55855	Transposable_element	37.7462	-2.72425	0.657783
AT4G24640	protein_coding	338.949	1.80051	0.657783
AT1G24620	protein_coding	89.374	1.90228	0.65788
AT2G07776	protein_coding	194.344	-3.06254	0.65788
AT5TE41420	Transposable_element	171.66	-3.16392	0.658788
AT3G21510	protein_coding	41.0539	2.06729	0.658967
AT1G23510	protein_coding	21.8049	-3.14355	0.660123
AT4G18990	protein_coding	10.3591	3.37664	0.663988
AT2G21727	protein_coding	56.5467	2.06876	0.666167
AT5G54540	protein_coding	3110.88	1.44769	0.666931
AT1G45211	pseudogene	21.3366	3.70854	0.668655
AT1G76780	protein_coding	11.452	-2.88871	0.668655
AT5G43525	protein_coding	34.3766	2.53051	0.670914
AT1G47900	protein_coding	286.55	-1.58358	0.67175
AT5G34905	protein_coding	44.9042	2.4764	0.672397
AT1TE86740	Transposable_element	109.501	-2.13648	0.673563
AT3G14770	protein_coding	91.71	2.30596	0.676541
AT5G41750	protein_coding	107.065	-2.5623	0.67665
AT3G49840	protein_coding	32.7743	2.86462	0.678503
AT4G02370	protein_coding	678.129	1.55787	0.678843
AT5G05280	protein_coding	23.1908	3.05449	0.678843
AT5G05282	protein_coding	23.1908	3.05449	0.678843
AT1G77660	protein_coding	96.0506	-1.93122	0.679983
AT1G30590	protein_coding	240.851	-1.63338	0.685788
AT1G33790	protein_coding	33.1301	3.20841	0.686055
AT1G63000	protein_coding	618.116	1.44767	0.686055
AT4G21323	protein_coding	19.1647	-2.69646	0.686665
AT4G36080	protein_coding	627.888	-1.64887	0.687066
AT1TE82675	Transposable_element	288.096	2.12867	0.690068
AT2G28620	protein_coding	294.381	-1.52017	0.690314
AT1G55870	protein_coding	51.4623	2.6757	0.69501
AT2G42280	protein_coding	21.5927	-3.33665	0.69501
AT3G05930	protein_coding	501.463	1.89113	0.69501
AT3G06900	small_nuclear_rna	450.387	-2.46174	0.69501
AT4G00780	protein_coding	381.064	1.4428	0.69501
AT5G21482	protein_coding	160.252	1.6876	0.69501
AT3G51650	protein_coding	311.665	-1.4358	0.696362
AT4G25150	protein_coding	80.649	-1.94338	0.696362
AT5G43518	protein_coding	46.2967	2.10285	0.696362
AT5G59040	protein_coding	106.778	2.18351	0.696362
AT5TE63200	Transposable_element	46.2967	2.10285	0.696362
AT5TE63225	Transposable_element	34.13	2.51568	0.696362
AT2G18440	other_rna	1570.05	-1.38529	0.698911
AT4G11660	protein_coding	309.526	-2.02407	0.700217
AT5G44800	protein_coding	766.649	-1.61842	0.701018
AT2G14878	other_rna	328.384	-1.40308	0.701203
AT1G76410	protein_coding	150.915	2.1607	0.703137
AT3G14280	protein_coding	123.431	2.09867	0.705668
AT3G10480	protein_coding	221.629	1.97956	0.70578
AT1G67050	protein_coding	785.831	1.57475	0.707494
AT2G19010	protein_coding	19.2679	2.51244	0.707915
AT1G09020	protein_coding	271.243	1.97253	0.708144
AT1G80700	protein_coding	252.276	-1.73089	0.708144
AT2G20560	protein_coding	290.095	-2.10213	0.708144
AT2G35140	protein_coding	17.459	-2.72326	0.708144
AT4G27910	protein_coding	183.294	-1.62342	0.708144
AT5G48060	protein_coding	25.7369	2.94151	0.708144
AT3G05630	protein_coding	25.623	3.1695	0.709054
AT1G13360	protein_coding	369.358	1.67697	0.709769
AT5G41690	protein_coding	17.9474	-2.75483	0.709769
ATCG01100	protein_coding	2461.85	-2.00946	0.709769
AT4G09462	protein_coding	16.4809	2.45239	0.711444
AT4G23880	protein_coding	65.4978	1.87733	0.712458
AT3TE44000	Transposable_element	39.3094	-3.25204	0.712764
AT2G33540	protein_coding	199.902	-1.6313	0.713987
AT1G24020	protein_coding	6476.3	1.35018	0.717448
AT5G09410	protein_coding	317.499	-1.47686	0.720558
AT1G05790	protein_coding	179.38	-1.65119	0.720604
AT4G19810	protein_coding	22.4564	2.41621	0.722362
AT1G10750	protein_coding	33.918	2.53808	0.723312
AT2G23290	protein_coding	119.668	-1.83745	0.724852
AT3G20010	protein_coding	232.227	-1.56234	0.729315
ATCG01250	protein_coding	4808.96	-2.60102	0.729315
AT1G62770	protein_coding	89.7624	1.77077	0.730956
ATCG00160	protein_coding	2074.5	-1.48525	0.730956
AT3G51640	protein_coding	433.71	-1.47015	0.731669
AT4G12410	protein_coding	69.8742	2.29565	0.733987
AT4TE32170	Transposable_element	13.7345	3.15865	0.73493
AT4G26270	protein_coding	347.988	-1.49788	0.737602
AT4G30780	protein_coding	103.602	2.03906	0.74049
AT1G01540	protein_coding	559.841	-1.58297	0.742997
AT3G57130	protein_coding	12.4391	3.28561	0.74322
AT5G49560	protein_coding	47.8978	-2.22279	0.745765
AT2G41070	protein_coding	24.3081	-2.71933	0.747232
AT1G16820	protein_coding	29.3062	-2.92226	0.749322
AT4G35350	protein_coding	135.908	1.68208	0.749322
AT1G14610	protein_coding	937.451	-1.32916	0.75088
AT1G19290	protein_coding	50.8922	-2.073	0.75088
AT3G52920	protein_coding	2783.84	1.45653	0.75088
AT3G14200	protein_coding	1035.16	-1.78156	0.751926
AT4G01670	protein_coding	27.9906	2.50374	0.752058
AT1G52450	protein_coding	22.5929	-2.93248	0.752669
AT4G02810	protein_coding	23.8861	2.59968	0.757138
AT5G46160	protein_coding	180.226	1.81426	0.75806
AT3G02670	protein_coding	56.5532	2.45408	0.761025
AT3G48720	protein_coding	44.8456	3.28813	0.770573
AT3G52155	protein_coding	197.001	1.97376	0.770573
AT3G57530	protein_coding	703.253	-1.48629	0.770573
AT4G18760	protein_coding	38.0604	2.23098	0.77284
AT4G36770	protein_coding	26.6593	2.28649	0.77284
AT5G45930	protein_coding	431.798	1.66129	0.774058
ATCG00120	protein_coding	15508.3	-2.09537	0.775458
AT3TE59865	Transposable_element	14.0264	2.56423	0.779637
AT2G39560	protein_coding	22.4991	3.08374	0.783336
AT1G70185	other_rna	100.219	-3.13096	0.784808
AT4G36620	protein_coding	14.7842	2.57201	0.784808
AT1G20570	protein_coding	13.2982	-3.23972	0.785223
AT3G56220	protein_coding	91.4674	1.88907	0.785223
AT4TE11900	Transposable_element	80.2965	-1.96255	0.786781
AT1G19376	small_nucleolar_rna	11.2797	-3.30374	0.789562
AT1G34340	protein_coding	160.714	-1.76434	0.789562
AT3G04310	protein_coding	12.9869	3.20893	0.789562
AT3G62390	protein_coding	88.3316	-1.87283	0.790463
AT1G71910	protein_coding	21.0364	2.56076	0.790914
AT2G39880	protein_coding	33.8298	2.47521	0.790914
AT3G45650	protein_coding	13.2305	-2.79682	0.790914
AT3G52500	protein_coding	1340.4	1.2829	0.790914
AT4G36280	protein_coding	12.4952	-2.66462	0.790914
AT4G37540	protein_coding	45.1709	2.37684	0.790914
AT1G58250	protein_coding	475.094	-1.98419	0.791531
AT2G15970	protein_coding	2358.87	1.32733	0.792614
AT2G07731	pseudogene	3210.31	-2.15102	0.793172
AT3G28030	protein_coding	151.925	-1.69964	0.793555
AT5G55710	protein_coding	1665.9	1.60673	0.795122
AT5G03080	protein_coding	353.726	1.38288	0.79685
AT2G46200	protein_coding	95.7719	-1.69368	0.797549
AT1G13220	protein_coding	208.656	-1.78668	0.797676
AT1G23100	protein_coding	347.388	1.42385	0.800145
AT2G04540	protein_coding	92.4652	-1.7493	0.801628
AT1G70070	protein_coding	226.007	-1.91321	0.803448
AT5G17930	protein_coding	299.883	-1.62892	0.803556
AT4G08290	protein_coding	235.671	1.63928	0.804566
AT5G38005	other_rna	93.0368	-2.02062	0.804566
AT4G12420	protein_coding	823.465	1.47022	0.805369
AT4G15680	protein_coding	10.4827	3.5219	0.805369
AT1G20680	protein_coding	16.9757	2.2756	0.805618
AT2G46192	other_rna	238.48	-1.56958	0.805618
AT4G21410	protein_coding	47.2834	-2.08938	0.810939
AT5G59580	protein_coding	12.9499	3.42638	0.810939
AT2G30470	protein_coding	230.859	-1.47659	0.815195
AT1G63730	protein_coding	64.4877	-2.70945	0.81546
AT1G56100	protein_coding	50.3769	2.85987	0.817537
AT5G48500	protein_coding	242.72	1.67697	0.817537
AT2G14830	protein_coding	39.6337	1.9613	0.818017
AT4G38600	protein_coding	1027.98	-1.46656	0.818017
AT1G17080	protein_coding	976.322	1.33946	0.818488
AT2G17972	protein_coding	255.042	1.70786	0.819318
AT3G46030	protein_coding	4727.71	1.26982	0.819929
AT2G14110	protein_coding	76.0752	1.97562	0.825474
AT1G35720	protein_coding	2901.15	1.54718	0.837759
AT2G17440	protein_coding	81.6147	-1.93212	0.837759
AT3G27200	protein_coding	1365.04	1.5523	0.842341
AT5G18480	protein_coding	383.064	1.7922	0.842341
AT3G59710	protein_coding	16.693	-2.77468	0.84786
AT1G56460	protein_coding	178.869	-1.56203	0.849144
AT3G08570	protein_coding	31.8214	-2.5108	0.849144
ATCG01190	pre_trna	4174.92	-1.99356	0.850958
AT2G07040	protein_coding	237.218	-1.89317	0.855491
AT3G46940	protein_coding	1596.62	1.32907	0.855491
AT1G71920	protein_coding	175.266	2.66705	0.857615
AT4G24680	protein_coding	692.109	-1.42324	0.857615
AT5G09585	small_nuclear_rna	562.585	-1.85912	0.858271
AT1G44160	protein_coding	33.1494	-1.88815	0.862158
AT2G14285	protein_coding	134.111	-1.52593	0.862158
AT2G31141	protein_coding	9007.4	-2.16321	0.862158
AT4G18740	protein_coding	33.4085	-2.30824	0.862158
AT5G20670	protein_coding	110.132	1.72429	0.862158
AT5G60030	protein_coding	55.5168	-2.03168	0.862158
AT2G35350	protein_coding	64.0773	-1.89435	0.864656
AT5G58630	protein_coding	16.8245	-2.7183	0.866033
AT1G75140	protein_coding	271.041	1.70874	0.868198
AT4G29830	protein_coding	226.419	1.65037	0.868198
AT1G62740	protein_coding	403.749	-1.422	0.869534
AT2G21440	protein_coding	346.966	-1.48933	0.871384
AT4G17250	protein_coding	35.6984	-2.45964	0.873349
AT3G26490	protein_coding	31.3141	2.29885	0.8754
AT1G73130	protein_coding	98.1848	-1.73217	0.878258
AT2G14090	pseudogene	26.7199	-2.65093	0.879616
AT2G27510	protein_coding	1219.87	1.22035	0.88008
AT1G79990	protein_coding	896.277	-1.27537	0.881499
AT4G13075	protein_coding	99.5904	1.95045	0.881499
AT4G18501	protein_coding	10.2721	3.02171	0.881499
AT4G31820	protein_coding	213.872	-1.66473	0.881499
AT5G03780	protein_coding	43.9405	-2.03193	0.881499
AT5G43340	protein_coding	72.9774	2.4912	0.881499
AT1G23410	protein_coding	83.7689	1.7534	0.882468
AT5G14870	protein_coding	34.5247	-2.10628	0.884818
AT1G08340	protein_coding	81.113	-1.62883	0.887529
AT1G79160	protein_coding	300.058	1.36955	0.887529
AT1G24210	protein_coding	29.3431	2.05178	0.888026
AT5G09870	protein_coding	1001.33	-1.51024	0.888026
AT4G39580	protein_coding	11.993	3.50521	0.88912
AT4G01270	protein_coding	39.9719	-2.41464	0.892216
AT5G47460	protein_coding	14.6434	-2.21624	0.895479
AT3G15340	protein_coding	73.7593	-1.76292	0.898476
AT2G07180	protein_coding	263.521	-1.43221	0.903005
AT4G12940	protein_coding	20.0117	2.63732	0.903005
AT5G58412	protein_coding	10.8676	2.466	0.903005
AT3G23370	protein_coding	21.073	3.02861	0.907743
AT4G18750	protein_coding	31.8709	2.79671	0.907743
AT3G26110	protein_coding	1500.57	1.96466	0.909228
AT3G25013	protein_coding	10.1659	-3.17446	0.909341
AT1G02190	protein_coding	829.288	-1.6577	0.917049
AT1G06050	protein_coding	44.7505	2.02109	0.923056
AT2G06040	protein_coding	102.653	-2.11696	0.923056
AT5G36670	protein_coding	127.354	-1.68881	0.925272
AT2G35700	protein_coding	13.9321	2.78337	0.925745
AT2G34830	protein_coding	20.3091	2.41502	0.928577
AT4G17770	protein_coding	226.079	-1.51752	0.930953
AT5G50790	protein_coding	2107.37	-1.6484	0.930953
AT5G50645	protein_coding	20.6654	-3.43674	0.931489
AT4G40000	protein_coding	55.5843	2.91488	0.932491
AT5G59300	protein_coding	398.106	1.54402	0.932875
AT4G16265	protein_coding	271.717	1.35287	0.933884
AT5G40490	protein_coding	261.275	-1.46445	0.933884
AT5G41650	protein_coding	20.2168	2.6018	0.940064
AT1G11350	protein_coding	55.745	-2.68107	0.941635
AT3G51740	protein_coding	328.464	-1.43118	0.941635
AT3G52140	protein_coding	1066.31	-1.36736	0.941635
AT1G31820	protein_coding	35.9808	2.03022	0.945734
AT3G57380	protein_coding	18.4885	2.64711	0.945734
AT2G40720	protein_coding	27.4768	-2.96168	0.946589
AT1G72410	protein_coding	446.205	-1.40738	0.947594
AT2G41520	protein_coding	224.812	-1.69426	0.947688
AT3G36659	protein_coding	16.1714	3.08288	0.947688
AT2G07826	pseudogene	99.5648	-2.91037	0.951725
AT2G32220	protein_coding	169.864	1.54919	0.951725
AT3G61010	protein_coding	143.111	-2.15009	0.951725
AT5G51440	protein_coding	221.887	-2.20077	0.953576
AT3G48110	protein_coding	317.743	-1.74616	0.954502
AT3G53970	protein_coding	405.337	1.56064	0.954502
AT3G06455	protein_coding	32.6135	-2.72942	0.954935
AT5G07130	protein_coding	16.2285	-3.38475	0.954935
AT3G10460	protein_coding	195.518	1.57704	0.956101
AT4G34060	protein_coding	13.2591	-3.45103	0.959277
AT2G34820	protein_coding	17.7097	2.24921	0.959929
AT4TE34565	Transposable_element	12.5683	-2.54574	0.961619
AT2G29960	protein_coding	793.424	1.40379	0.962962
AT3G12460	protein_coding	55.8109	1.97399	0.962962
AT3G43833	protein_coding	497.801	1.94966	0.962962
AT1G74490	protein_coding	24.078	-2.11497	0.963422
AT4G00975	other_rna	60.45	-2.50487	0.963787
AT4G12960	protein_coding	1153.06	1.75405	0.964536
AT2G39030	protein_coding	270.75	3.18538	0.965114
AT3G15605	protein_coding	19.6365	-3.04121	0.965114
AT4TE10320	Transposable_element	12.7083	3.16342	0.965114
ATCG00820	protein_coding	4688.42	-1.41857	0.965114
AT1G17700	protein_coding	71.3227	1.7881	0.965355
AT2G31010	protein_coding	123.913	-2.13857	0.969359
AT2G43060	protein_coding	18.0779	3.20333	0.970496
AT1G13040	protein_coding	15.076	-3.0655	0.972971
AT1G09350	protein_coding	24.5199	3.13177	0.973231
AT1G15940	protein_coding	538.27	-1.40265	0.973231
AT3G24715	protein_coding	52.1249	-2.8648	0.975382
AT3G54870	protein_coding	12.5476	-2.52684	0.975382
AT2G41225	protein_coding	22.076	2.34969	0.978005
AT1G25240	protein_coding	68.2796	-1.7169	0.98209
AT1G64105	protein_coding	59.1786	1.75858	0.98209
AT3G25870	protein_coding	145.888	1.54919	0.98209
AT2G19720	protein_coding	325.822	1.59342	0.982953
AT2TE14160	Transposable_element	25.0535	-3.00771	0.985659
AT3G21390	protein_coding	141.97	-1.6357	0.985659
AT3G25290	protein_coding	822.594	1.61653	0.985659
AT4G33200	protein_coding	491.366	-1.53847	0.985659
AT2TE03650	Transposable_element	56.9264	2.66215	0.987264
AT2G31960	protein_coding	878.15	-1.34143	0.989849
AT4G29905	protein_coding	1175.55	-1.46387	0.990299
AT5G43403	other_rna	29.4429	-2.18337	0.991613
AT1G33520	protein_coding	472.957	-1.29379	0.991645
AT1G78160	protein_coding	29.0805	2.88393	0.991645
AT5G10980	protein_coding	6319.2	1.17065	0.991645
AT4G37790	protein_coding	176.493	1.88603	0.992766
AT1G13790	protein_coding	93.5168	-1.93908	0.993891
AT1G73040	protein_coding	16.9975	2.43472	0.99558
AT3G01440	protein_coding	123.765	1.59879	0.996188
AT4G17260	protein_coding	396.991	1.65688	0.996188
AT2G39445	protein_coding	58.4228	2.06185	0.996302
AT5G22470	protein_coding	15.2916	-3.3318	0.996688
AT1G27170	protein_coding	93.0001	-1.88624	0.999069
AT4G19220	protein_coding	16.5702	-2.58504	0.999779
AT1G01010	protein_coding	32.7247	0.959932	1
AT1G01020	protein_coding	97.8369	-0.513602	1
AT1G01030	protein_coding	100.802	-0.163611	1
AT1G01040	protein_coding	353.298	-1.35975	1
AT1G01050	protein_coding	707.933	0.545191	1
AT1G01060	protein_coding	889.032	-0.96801	1
AT1G01070	protein_coding	42.8789	-0.516588	1
AT1G01080	protein_coding	276.226	0.411009	1
AT1G01090	protein_coding	1274.68	0.00260005	1
AT1G01100	protein_coding	14744.8	0.898572	1
AT1G01110	protein_coding	173.748	-0.377546	1
AT1G01120	protein_coding	876.109	0.395556	1
AT1G01130	protein_coding	59.9724	-0.912205	1
AT1G01140	protein_coding	465.163	-1.30443	1
AT1G01160	protein_coding	344.478	-0.383853	1
AT1G01170	protein_coding	595.763	0.960809	1
AT1G01200	protein_coding	31.1443	1.35017	1
AT1G01210	protein_coding	86.7026	-0.818144	1
AT1G01220	protein_coding	173.871	-0.780711	1
AT1G01225	protein_coding	47.5172	0.48112	1
AT1G01230	protein_coding	241.415	1.1735	1
AT1G01240	protein_coding	657.95	0.196581	1
AT1G01250	protein_coding	1012.96	1.1907	1
AT1G01260	protein_coding	150.176	0.21379	1
AT1G01280	protein_coding	164.672	-0.811766	1
AT1G01290	protein_coding	157.11	0.891023	1
AT1G01300	protein_coding	1136.28	0.137205	1
AT1G01310	protein_coding	114.67	-0.171345	1
AT1G01340	protein_coding	12.6856	-1.62925	1
AT1G01350	protein_coding	149.808	-0.679023	1
AT1G01360	protein_coding	140.96	0.185742	1
AT1G01370	protein_coding	147.308	-0.271453	1
AT1G01430	protein_coding	351.635	-0.1001	1
AT1G01440	protein_coding	91.0295	1.07214	1
AT1G01448	other_rna	38.8581	-1.59428	1
AT1G01460	protein_coding	37.1874	-1.17013	1
AT1G01470	protein_coding	477.207	1.29174	1
AT1G01480	protein_coding	37.7809	0.774019	1
AT1G01490	protein_coding	494.601	-0.0794042	1
AT1G01500	protein_coding	344.108	0.327428	1
AT1G01510	protein_coding	617.447	-0.136391	1
AT1G01550	protein_coding	1982.74	0.381596	1
AT1G01560	protein_coding	25.2144	-0.238081	1
AT1G01570	protein_coding	33.5682	1.40154	1
AT1G01580	protein_coding	51.3064	0.161667	1
AT1G01590	protein_coding	49.4413	-1.08127	1
AT1G01600	protein_coding	747.106	-0.385461	1
AT1G01610	protein_coding	626.095	0.732412	1
AT1G01620	protein_coding	4868.13	0.274507	1
AT1G01630	protein_coding	556.292	1.16601	1
AT1G01640	protein_coding	41.2682	-0.358273	1
AT1G01650	protein_coding	311.001	-0.79346	1
AT1G01670	protein_coding	21.3981	-0.0182462	1
AT1G01690	protein_coding	74.5036	-0.368164	1
AT1G01710	protein_coding	279.829	-0.916787	1
AT1G01720	protein_coding	486.627	-0.663936	1
AT1G01725	protein_coding	81.3209	-0.901875	1
AT1G01730	protein_coding	250.49	0.396019	1
AT1G01740	protein_coding	29.3691	-1.00568	1
AT1G01750	protein_coding	37.0123	1.84616	1
AT1G01760	protein_coding	27.0861	-0.922087	1
AT1G01770	protein_coding	139.581	-0.848292	1
AT1G01780	protein_coding	253.229	-0.503046	1
AT1G01790	protein_coding	456.775	-0.673915	1
AT1G01800	protein_coding	640.11	0.198531	1
AT1G01820	protein_coding	582.511	0.116846	1
AT1G01830	protein_coding	295.481	-0.370174	1
AT1G01840	protein_coding	22.9265	1.74243	1
AT1G01860	protein_coding	70.4532	0.951959	1
AT1G01880	protein_coding	66.9478	-1.06029	1
AT1G01900	protein_coding	208.413	0.319185	1
AT1G01910	protein_coding	1043.89	0.833704	1
AT1G01920	protein_coding	148.795	-1.17026	1
AT1G01930	protein_coding	84.4308	-0.256768	1
AT1G01940	protein_coding	145.031	0.211181	1
AT1G01950	protein_coding	239.859	-1.17895	1
AT1G01960	protein_coding	859.804	-0.150333	1
AT1G01970	protein_coding	310.424	0.734564	1
AT1G01980	protein_coding	133.773	0.21905	1
AT1G01990	protein_coding	126.86	-0.695834	1
AT1G02000	protein_coding	234.367	-1.29185	1
AT1G02010	protein_coding	132.998	-0.773601	1
AT1G02020	protein_coding	82.2236	0.103712	1
AT1G02040	protein_coding	77.7663	-0.241009	1
AT1G02050	protein_coding	333.468	-0.886606	1
AT1G02060	protein_coding	26.403	0	1
AT1G02065	protein_coding	264.979	-0.932275	1
AT1G02070	protein_coding	71.7722	0.699375	1
AT1G02080	protein_coding	1285.47	-0.690926	1
AT1G02090	protein_coding	477.416	-0.402316	1
AT1G02100	protein_coding	290.701	-0.185285	1
AT1G02110	protein_coding	214.077	-0.686651	1
AT1G02120	protein_coding	305.536	-1.18624	1
AT1G02130	protein_coding	954.185	0.328018	1
AT1G02140	protein_coding	616.715	0.379915	1
AT1G02145	protein_coding	197.3	-0.545013	1
AT1G02150	protein_coding	503.835	-0.583341	1
AT1G02160	protein_coding	375.918	-0.47066	1
AT1G02170	protein_coding	175.156	0.12463	1
AT1G02180	protein_coding	170.7	0.920417	1
AT1G02205	protein_coding	4900.3	-0.474888	1
AT1G02220	protein_coding	16.4069	-1.28881	1
AT1G02260	protein_coding	89.0764	-1.0078	1
AT1G02270	protein_coding	180.614	-0.42699	1
AT1G02280	protein_coding	644.102	-0.426283	1
AT1G02290	protein_coding	120.308	-0.0691239	1
AT1G02300	protein_coding	131.813	-1.58064	1
AT1G02305	protein_coding	1353.7	0.452911	1
AT1G02310	protein_coding	17.4775	1.05284	1
AT1G02330	protein_coding	170.234	0.0164241	1
AT1G02340	protein_coding	95.6963	0.258167	1
AT1G02350	protein_coding	11.8574	-0.0937443	1
AT1G02370	protein_coding	117.434	0.306818	1
AT1G02380	protein_coding	32.5028	0.00811019	1
AT1G02390	protein_coding	40.8975	0.519643	1
AT1G02400	protein_coding	14.9649	0.127824	1
AT1G02410	protein_coding	118.322	0.617563	1
AT1G02420	protein_coding	25.6936	0	1
AT1G02450	protein_coding	115.048	-0.33844	1
AT1G02460	protein_coding	27.413	-0.146134	1
AT1G02470	protein_coding	242.283	1.60109	1
AT1G02475	protein_coding	329.631	0.529453	1
AT1G02500	protein_coding	1843.14	-0.665554	1
AT1G02520	protein_coding	54.8179	1.13202	1
AT1G02530	protein_coding	31.6635	-0.386398	1
AT1G02560	protein_coding	1640	0.582812	1
AT1G02610	protein_coding	47.45	0.202708	1
AT1G02630	protein_coding	68.4212	0.357069	1
AT1G02640	protein_coding	229.955	0.0746512	1
AT1G02650	protein_coding	10.0586	-1.24732	1
AT1G02660	protein_coding	632.056	-0.603513	1
AT1G02670	protein_coding	34.1635	-1.83738	1
AT1G02680	protein_coding	119.365	0.792644	1
AT1G02690	protein_coding	262.197	0.293154	1
AT1G02720	protein_coding	129.884	-0.547941	1
AT1G02730	protein_coding	1587.45	0.0288133	1
AT1G02740	protein_coding	125.676	-0.0260866	1
AT1G02750	protein_coding	123.374	0.291959	1
AT1G02770	protein_coding	27.3081	0.839237	1
AT1G02780	protein_coding	13111.2	0.0202928	1
AT1G02790	protein_coding	2840.53	-0.41085	1
AT1G02800	protein_coding	198.451	-0.040698	1
AT1G02810	protein_coding	97.8165	-0.276309	1
AT1G02813	protein_coding	664.493	0.632413	1
AT1G02820	protein_coding	58.5005	0.502975	1
AT1G02840	protein_coding	641.429	-0.0459137	1
AT1G02850	protein_coding	429.017	-0.0581058	1
AT1G02860	protein_coding	148.94	0.179536	1
AT1G02870	protein_coding	271.412	-0.322333	1
AT1G02880	protein_coding	192.925	-0.0192083	1
AT1G02890	protein_coding	432.737	-1.12413	1
AT1G02900	protein_coding	60.4378	0.785624	1
AT1G02910	protein_coding	203.498	-0.658422	1
AT1G02920	protein_coding	14.7248	-0.85167	1
AT1G02930	protein_coding	498.4	1.07281	1
AT1G02950	protein_coding	187.379	0.62081	1
AT1G02960	protein_coding	91.0715	-1.26345	1
AT1G02970	protein_coding	32.8037	0.720012	1
AT1G02980	protein_coding	10.6984	-2.39355	1
AT1G02990	protein_coding	216.749	-0.48569	1
AT1G03000	protein_coding	157.057	-0.330228	1
AT1G03010	protein_coding	22.3924	-0.615561	1
AT1G03030	protein_coding	115.824	-0.212837	1
AT1G03040	protein_coding	674.769	0.172326	1
AT1G03050	protein_coding	263.143	-1.40222	1
AT1G03060	protein_coding	755.175	-1.06268	1
AT1G03070	protein_coding	56.3359	0.0157061	1
AT1G03090	protein_coding	172.048	-1.59135	1
AT1G03100	protein_coding	24.6623	-1.00711	1
AT1G03110	protein_coding	151.548	-0.0767083	1
AT1G03120	protein_coding	16.5603	0.994592	1
AT1G03130	protein_coding	2273.45	1.09089	1
AT1G03140	protein_coding	426.767	-0.0682339	1
AT1G03150	protein_coding	180.698	0.928294	1
AT1G03160	protein_coding	274.083	0.479129	1
AT1G03170	protein_coding	429.269	1.18918	1
AT1G03180	protein_coding	30.101	0.961243	1
AT1G03190	protein_coding	125.306	-0.0640803	1
AT1G03210	protein_coding	84.255	-0.274632	1
AT1G03220	protein_coding	238.69	0.737861	1
AT1G03230	protein_coding	161.881	0.492484	1
AT1G03250	protein_coding	410.562	-0.00527459	1
AT1G03260	protein_coding	75.8097	0.0301487	1
AT1G03270	protein_coding	52.9353	-0.379517	1
AT1G03280	protein_coding	219.046	-0.468267	1
AT1G03290	protein_coding	307.97	0.232006	1
AT1G03300	protein_coding	51.6112	-1.11922	1
AT1G03310	protein_coding	417.53	0.365402	1
AT1G03330	protein_coding	701.136	0.547349	1
AT1G03340	protein_coding	36.1324	1.01328	1
AT1G03350	protein_coding	1048.06	-0.242507	1
AT1G03360	protein_coding	181.803	0.0345102	1
AT1G03365	protein_coding	186.416	-1.51886	1
AT1G03370	protein_coding	144.145	0.386842	1
AT1G03380	protein_coding	308.325	0.630042	1
AT1G03390	protein_coding	38.2581	-0.437473	1
AT1G03400	protein_coding	64.3662	0.73903	1
AT1G03430	protein_coding	166.597	0.493458	1
AT1G03440	protein_coding	84.6607	1.01178	1
AT1G03457	protein_coding	65.3758	0.421485	1
AT1G03470	protein_coding	133.012	-0.640235	1
AT1G03475	protein_coding	1104.4	0.361187	1
AT1G03506	small_nucleolar_rna	19.5225	-0.563507	1
AT1G03510	protein_coding	19.5111	-0.539171	1
AT1G03520	protein_coding	97.6817	-0.374639	1
AT1G03530	protein_coding	180.462	-0.89257	1
AT1G03540	protein_coding	21.4133	-2.30207	1
AT1G03545	other_rna	23.3078	0.630103	1
AT1G03550	protein_coding	51.0445	-0.531533	1
AT1G03560	protein_coding	56.8024	-0.361883	1
AT1G03590	protein_coding	382.803	-1.11419	1
AT1G03610	protein_coding	360.863	-0.0579068	1
AT1G03620	protein_coding	17.1632	1.25336	1
AT1G03630	protein_coding	1493.81	0.518434	1
AT1G03650	protein_coding	24.6033	0.040426	1
AT1G03660	protein_coding	26.4098	-2.02461	1
AT1G03680	protein_coding	1860.21	0.710325	1
AT1G03687	protein_coding	65.1163	-0.549995	1
AT1G03710	protein_coding	373.566	0.502958	1
AT1G03740	protein_coding	158.63	-0.14515	1
AT1G03750	protein_coding	86.3093	-1.25644	1
AT1G03760	protein_coding	83.8536	-0.750581	1
AT1G03770	protein_coding	58.6148	0.929806	1
AT1G03780	protein_coding	255.858	-0.929774	1
AT1G03820	protein_coding	219.04	0.854645	1
AT1G03830	protein_coding	154.351	-0.600959	1
AT1G03840	protein_coding	28.6265	0.563877	1
AT1G03850	protein_coding	76.63	-0.886967	1
AT1G03860	protein_coding	672.131	-0.0775065	1
AT1G03870	protein_coding	568.626	0.421952	1
AT1G03900	protein_coding	829.578	-0.184846	1
AT1G03905	protein_coding	32.6047	-0.354223	1
AT1G03910	protein_coding	424.525	-1.22103	1
AT1G03920	protein_coding	31.1516	0.0890732	1
AT1G03930	protein_coding	132.374	-1.66395	1
AT1G03940	protein_coding	13.1877	2.35781	1
AT1G03950	protein_coding	89.9371	1.09947	1
AT1G03960	protein_coding	107.402	-0.651575	1
AT1G03970	protein_coding	192.677	0.209618	1
AT1G04000	protein_coding	178.538	-0.575732	1
AT1G04010	protein_coding	76.7567	-1.97893	1
AT1G04020	protein_coding	118.043	-0.265897	1
AT1G04030	protein_coding	108.61	-0.207884	1
AT1G04040	protein_coding	111.081	0.857519	1
AT1G04050	protein_coding	86.1694	-0.654055	1
AT1G04070	protein_coding	245.77	0.688994	1
AT1G04080	protein_coding	998.422	-0.684018	1
AT1G04090	protein_coding	18.1307	0.180933	1
AT1G04100	protein_coding	39.4639	-1.62509	1
AT1G04110	protein_coding	41.9822	-1.32574	1
AT1G04120	protein_coding	1011.72	-0.673442	1
AT1G04130	protein_coding	134.172	-0.218928	1
AT1G04140	protein_coding	694.547	0.243581	1
AT1G04150	protein_coding	12.8111	0.435662	1
AT1G04160	protein_coding	91.5973	-2.3547	1
AT1G04170	protein_coding	1633.02	0.116618	1
AT1G04190	protein_coding	357.008	0.880913	1
AT1G04200	protein_coding	224.867	-0.533204	1
AT1G04210	protein_coding	468.582	-0.379972	1
AT1G04220	protein_coding	535.343	0.599916	1
AT1G04230	protein_coding	76.0324	-0.266797	1
AT1G04240	protein_coding	360.202	0.698761	1
AT1G04250	protein_coding	423.334	1.09124	1
AT1G04260	protein_coding	598.384	0.850064	1
AT1G04270	protein_coding	14052.7	0.851018	1
AT1G04280	protein_coding	93.3108	-0.457409	1
AT1G04290	protein_coding	366.158	0.482541	1
AT1G04310	protein_coding	180.803	-0.673878	1
AT1G04350	protein_coding	211.64	0.5375	1
AT1G04390	protein_coding	72.0934	-1.04587	1
AT1G04400	protein_coding	1176.12	0.242563	1
AT1G04410	protein_coding	7464.47	0.843652	1
AT1G04420	protein_coding	360.693	0.00363082	1
AT1G04425	other_rna	84.2144	-0.836441	1
AT1G04430	protein_coding	722.397	0.0655291	1
AT1G04440	protein_coding	268.895	-0.465143	1
AT1G04450	protein_coding	18.7312	0.360796	1
AT1G04470	protein_coding	160.742	-1.60524	1
AT1G04480	protein_coding	2415.87	-0.0310099	1
AT1G04500	protein_coding	25.0683	0.148096	1
AT1G04510	protein_coding	792.492	0.581118	1
AT1G04520	protein_coding	200.475	0.779149	1
AT1G04530	protein_coding	452.838	0.080897	1
AT1G04540	protein_coding	98.674	-0.644375	1
AT1G04550	protein_coding	603.276	0.35419	1
AT1G04555	protein_coding	44.8021	-0.352288	1
AT1G04570	protein_coding	35.8618	-0.912675	1
AT1G04580	protein_coding	103.51	-1.18738	1
AT1G04590	protein_coding	136.77	-0.802911	1
AT1G04610	protein_coding	20.4717	-0.237125	1
AT1G04620	protein_coding	154.65	-0.364108	1
AT1G04625	protein_coding	747.546	0.910293	1
AT1G04630	protein_coding	1175.77	1.08442	1
AT1G04635	protein_coding	27.5413	0.616631	1
AT1G04640	protein_coding	255.959	0.515641	1
AT1G04650	protein_coding	37.4906	-0.365622	1
AT1G04660	protein_coding	296.611	-0.539352	1
AT1G04670	protein_coding	71.9784	1.23556	1
AT1G04680	protein_coding	2339.83	0.158838	1
AT1G04690	protein_coding	1227.32	0.55748	1
AT1G04700	protein_coding	79.4915	0.932283	1
AT1G04710	protein_coding	168.813	0.19654	1
AT1G04730	protein_coding	80.2925	-0.923206	1
AT1G04750	protein_coding	2473.58	0.140332	1
AT1G04760	protein_coding	49.2757	0.339803	1
AT1G04770	protein_coding	518.331	0.262172	1
AT1G04780	protein_coding	418.464	-0.679656	1
AT1G04790	protein_coding	270.912	-0.280076	1
AT1G04800	protein_coding	412.197	-0.52178	1
AT1G04810	protein_coding	444.442	-1.31922	1
AT1G04820	protein_coding	15281.8	0.0890956	1
AT1G04830	protein_coding	123.427	0.862582	1
AT1G04840	protein_coding	17.0381	-2.90154	1
AT1G04850	protein_coding	799.447	-0.517036	1
AT1G04860	protein_coding	215.784	0.818977	1
AT1G04870	protein_coding	213.132	0.675248	1
AT1G04880	protein_coding	30.6302	1.0431	1
AT1G04890	protein_coding	27.4155	-0.261836	1
AT1G04900	protein_coding	136.528	-0.295168	1
AT1G04910	protein_coding	219.848	-0.0481887	1
AT1G04920	protein_coding	61.406	-2.18329	1
AT1G04930	protein_coding	100.621	-0.145169	1
AT1G04940	protein_coding	219.921	0.447615	1
AT1G04945	protein_coding	306.91	0.931114	1
AT1G04950	protein_coding	259.202	-0.630538	1
AT1G04960	protein_coding	234.081	0.039167	1
AT1G04970	protein_coding	223.759	-0.343044	1
AT1G04980	protein_coding	129.656	-0.296045	1
AT1G04985	protein_coding	122.187	0.37752	1
AT1G04990	protein_coding	211.478	0.935459	1
AT1G05000	protein_coding	29.5707	0.235611	1
AT1G05010	protein_coding	238.69	1.07769	1
AT1G05020	protein_coding	20.4447	-0.263944	1
AT1G05030	protein_coding	81.8424	-0.50766	1
AT1G05055	protein_coding	83.7589	0.777994	1
AT1G05060	protein_coding	110.349	0.0142551	1
AT1G05070	protein_coding	135.014	-0.480597	1
AT1G05090	protein_coding	169.956	-1.07997	1
AT1G05100	protein_coding	93.987	0.0245781	1
AT1G05120	protein_coding	358.232	-0.722734	1
AT1G05135	pseudogene	675.371	-1.11353	1
AT1G05140	protein_coding	301.953	-0.316208	1
AT1G05150	protein_coding	423.217	-0.629767	1
AT1G05160	protein_coding	108.135	-1.47581	1
AT1G05170	protein_coding	144.3	-1.53168	1
AT1G05180	protein_coding	258.347	0.0135158	1
AT1G05190	protein_coding	1769.19	-0.490301	1
AT1G05200	protein_coding	131.189	0.407121	1
AT1G05205	protein_coding	179.343	0.343733	1
AT1G05210	protein_coding	238.071	1.04623	1
AT1G05230	protein_coding	124.748	-0.293555	1
AT1G05260	protein_coding	88.8107	0.772799	1
AT1G05270	protein_coding	173.524	0.482009	1
AT1G05300	protein_coding	18.4955	0.606701	1
AT1G05310	protein_coding	21.9603	1.14435	1
AT1G05320	protein_coding	282.985	-0.268936	1
AT1G05340	protein_coding	381.84	1.06115	1
AT1G05350	protein_coding	134.08	-0.909551	1
AT1G05360	protein_coding	114.914	1.01507	1
AT1G05370	protein_coding	13.4142	-0.605836	1
AT1G05380	protein_coding	402.314	-1.08293	1
AT1G05385	protein_coding	129.332	-0.0253221	1
AT1G05410	protein_coding	122.996	0.686547	1
AT1G05420	protein_coding	17.2706	-0.0235928	1
AT1G05430	protein_coding	228.418	0.0473377	1
AT1G05440	protein_coding	76.6756	0.601836	1
AT1G05450	protein_coding	144.368	0.709996	1
AT1G05470	protein_coding	133.905	-0.422512	1
AT1G05490	protein_coding	475.049	-0.504237	1
AT1G05500	protein_coding	326.116	-0.367694	1
AT1G05520	protein_coding	369.228	-0.114931	1
AT1G05540	protein_coding	314.375	0.379189	1
AT1G05550	protein_coding	121.634	-1.25875	1
AT1G05560	protein_coding	149.625	-0.100782	1
AT1G05562	other_rna	40.7425	1.65708	1
AT1G05575	protein_coding	19.0449	1.18935	1
AT1G05577	protein_coding	28.218	0.820661	1
AT1G05590	protein_coding	175.151	-0.135051	1
AT1G05600	protein_coding	97.6752	-0.529208	1
AT1G05620	protein_coding	402.356	0.276076	1
AT1G05630	protein_coding	134.762	-1.12177	1
AT1G05640	protein_coding	45.9794	-0.388943	1
AT1G05670	protein_coding	49.7128	-0.93674	1
AT1G05675	protein_coding	15.666	-1.46324	1
AT1G05680	protein_coding	181.568	0.489843	1
AT1G05690	protein_coding	14.7256	-1.02386	1
AT1G05710	protein_coding	232.485	-0.952025	1
AT1G05720	protein_coding	376.169	0.764382	1
AT1G05730	protein_coding	43.6247	0.0874765	1
AT1G05750	protein_coding	63.2873	-0.353729	1
AT1G05760	protein_coding	33.4644	1.33539	1
AT1G05780	protein_coding	48.0629	-0.321404	1
AT1G05785	protein_coding	91.3452	1.29892	1
AT1G05805	protein_coding	211.15	-0.109102	1
AT1G05810	protein_coding	33.3958	0.172144	1
AT1G05820	protein_coding	38.3282	0.47773	1
AT1G05830	protein_coding	277.206	-1.24244	1
AT1G05835	protein_coding	538.053	0.171277	1
AT1G05840	protein_coding	217.044	0.10802	1
AT1G05850	protein_coding	6943.66	0.140338	1
AT1G05860	protein_coding	64.7403	0.859275	1
AT1G05870	protein_coding	244.523	0.764737	1
AT1G05890	protein_coding	385.997	-0.249615	1
AT1G05900	protein_coding	71.4154	0.0314802	1
AT1G05910	protein_coding	273.8	0.491692	1
AT1G05940	protein_coding	346.665	-0.0957524	1
AT1G05950	protein_coding	82.9115	-0.364931	1
AT1G05960	protein_coding	567.091	-1.29187	1
AT1G05970	protein_coding	229.99	0.562927	1
AT1G06000	protein_coding	868.043	-0.129306	1
AT1G06002	other_rna	44.0962	-1.64167	1
AT1G06010	protein_coding	350.787	-0.39391	1
AT1G06040	protein_coding	2853.19	1.1394	1
AT1G06060	protein_coding	886.715	0.529125	1
AT1G06070	protein_coding	480.789	0.546083	1
AT1G06080	protein_coding	480.705	0.405439	1
AT1G06090	protein_coding	15.5368	2.07405	1
AT1G06110	protein_coding	250.645	-0.253159	1
AT1G06130	protein_coding	191.712	1.40206	1
AT1G06149	protein_coding	223.737	-0.910379	1
AT1G06150	protein_coding	259.485	-0.690487	1
AT1G06160	protein_coding	18.8876	0	1
AT1G06170	protein_coding	70.7878	-0.628504	1
AT1G06180	protein_coding	68.1148	1.16684	1
AT1G06190	protein_coding	1023.46	0.505395	1
AT1G06200	protein_coding	544.671	-0.194993	1
AT1G06210	protein_coding	698.134	0.425422	1
AT1G06220	protein_coding	714.669	-0.840555	1
AT1G06230	protein_coding	2137.01	-0.751164	1
AT1G06240	protein_coding	137.472	0.11727	1
AT1G06250	protein_coding	67.5972	0.485857	1
AT1G06260	protein_coding	488.767	0.468366	1
AT1G06270	protein_coding	51.2667	0.935531	1
AT1G06280	protein_coding	66.7734	-0.902459	1
AT1G06290	protein_coding	505.816	0.0538754	1
AT1G06350	protein_coding	1251.26	0.789042	1
AT1G06360	protein_coding	73.6217	0.951491	1
AT1G06370	pseudogene	22.1281	-1.8236	1
AT1G06380	protein_coding	172.641	0.9058	1
AT1G06390	protein_coding	291.121	0.0928882	1
AT1G06400	protein_coding	1110.37	0.547217	1
[truncated: 35,728 more rows]

## Sheet: total vs. Polysome (ddm1)
Supplemental Table S3. Polysome association of cellular A. thaliana RNAs.
Differential analysis of total RNA and polysome associated RNAs of genes and transposons in wild type and ddm1 backgrounds
Gene.ID	Gene.Class	baseMean	log2FoldChange	Adjusted.P-value
AT5TE41070	Transposable_element	6952.91	-2.69872	7.84623e-133
AT5TE42190	Transposable_element	5246.64	-2.8265	1.64542e-70
AT5TE42710	Transposable_element	8569.6	-2.49237	2.10316e-61
ATMG00580	protein_coding	9695.83	-2.97173	1.14539e-48
AT1TE45020	Transposable_element	1279.79	-3.45911	5.41702e-43
AT4TE19915	Transposable_element	3034.9	-2.28936	1.1333e-41
AT5TE42440	Transposable_element	7667.24	-2.63318	6.81111e-39
AT1TE62470	Transposable_element	1357.52	-2.85239	1.39998e-38
AT1TE38940	Transposable_element	1158.95	-3.35137	9.44957e-37
AT4TE17470	Transposable_element	2534.39	-2.82029	1.05378e-36
AT2TE16825	Transposable_element	2544.65	-2.64412	2.84083e-36
AT4TE05190	Transposable_element	2192.94	-2.82086	4.22086e-35
AT5TE42355	Transposable_element	836.273	-2.96906	6.1316e-33
ATCG01040	protein_coding	2927.08	-2.76631	1.35887e-32
AT5TE47115	Transposable_element	1410.94	-3.32684	5.02559e-32
AT3TE58020	Transposable_element	694.674	-3.11154	1.82051e-30
AT2TE20220	Transposable_element	1768.5	-2.98728	5.11866e-29
AT3TE60525	Transposable_element	990.436	-2.8489	5.49273e-29
ATMG00080	protein_coding	4138.04	-2.77926	3.05326e-28
AT4TE10350	Transposable_element	1609.91	-3.23766	1.27276e-27
AT5TE42660	Transposable_element	557.92	-3.17273	1.72078e-26
AT4TE17360	Transposable_element	2772.08	-2.80719	4.84186e-26
AT1TE49260	Transposable_element	3992.94	-2.69325	7.44933e-26
AT5TE42135	Transposable_element	10816.7	-2.53212	1.41995e-25
ATCG00040	protein_coding	11428.9	-3.30328	2.67717e-25
AT2TE17110	Transposable_element	534.583	-3.45134	5.05423e-25
AT2TE17095	Transposable_element	537.139	-3.3677	9.41637e-25
AT5TE42965	Transposable_element	866.409	-2.83391	1.03044e-24
AT3TE63540	Transposable_element	3952.01	-2.40076	5.27055e-24
AT3TE51380	Transposable_element	763.326	-3.21185	6.17689e-24
AT5TE42420	Transposable_element	2549.45	-2.77966	7.28373e-24
AT4TE19925	Transposable_element	2338.73	-2.21698	7.18755e-23
AT4TE20400	Transposable_element	1136.15	-2.69502	4.11762e-22
AT5TE46215	Transposable_element	1006.68	-2.68474	4.47479e-22
AT1G25175	other_rna	5047.53	-2.66809	7.31117e-22
AT4TE18435	Transposable_element	623.624	-2.60114	1.95643e-21
AT4TE20800	Transposable_element	434.026	-3.63334	1.95643e-21
AT2TE63800	Transposable_element	2188.84	-2.87071	2.69327e-21
ATCG00660	protein_coding	2306.89	-2.78222	2.62684e-20
AT2TE15880	Transposable_element	2631.09	-2.41033	1.43051e-19
AT1TE49300	Transposable_element	1414.86	-3.15895	1.64977e-19
AT5TE43665	Transposable_element	1212.81	-2.62521	1.8311e-19
AT1TE51700	Transposable_element	239.327	-3.79643	3.5438e-19
ATCG00630	protein_coding	12559.5	-3.90594	3.59447e-19
AT1TE51705	Transposable_element	239.123	-3.79633	3.69923e-19
AT1TE47750	Transposable_element	290.419	-2.87891	6.0317e-19
AT4TE15030	Transposable_element	2287.93	-2.61891	9.0381e-19
AT4TE16945	Transposable_element	2757.93	-2.64203	1.07378e-18
AT1TE46765	Transposable_element	570.137	-4.30026	1.6744e-18
AT4TE21055	Transposable_element	1106	-2.93185	2.40499e-18
AT4TE18445	Transposable_element	408.719	-2.67083	3.5133e-18
AT2TE20255	Transposable_element	1500.12	-3.01945	6.42301e-18
AT1TE52105	Transposable_element	3019.91	-2.82641	7.40643e-18
AT2G07708	protein_coding	3576.05	-2.90299	1.122e-17
AT3TE51340	Transposable_element	424.733	-2.89308	2.06752e-17
AT5TE43260	Transposable_element	2759.68	-2.36967	3.20522e-17
AT3TE55025	Transposable_element	433.706	-3.28301	3.94408e-17
AT3TE60280	Transposable_element	2941.52	-3.33447	6.82845e-17
AT3TE57150	Transposable_element	831.565	-2.91508	1.33541e-16
AT2G07709	pseudogene	6198.92	-3.79403	8.19418e-16
AT1TE48830	Transposable_element	414.451	-3.1688	8.25127e-16
AT5TE42900	Transposable_element	379.025	-2.73733	8.97131e-16
AT3TE53970	Transposable_element	1399.13	-2.76625	1.33829e-15
AT4TE16570	Transposable_element	1418.64	-2.64954	1.39546e-15
AT3TE69350	Transposable_element	2058.22	-2.06369	1.41488e-15
AT2TE12555	Transposable_element	548.854	-2.53235	1.7665e-15
AT4TE14540	Transposable_element	1619.79	-2.52645	2.51277e-15
AT3TE50025	Transposable_element	1106.65	-2.8331	4.75649e-15
AT1G75166	small_nucleolar_rna	201.834	-4.50822	4.87182e-15
AT2TE11985	Transposable_element	455.503	-2.80615	7.40691e-15
AT2TE12020	Transposable_element	438.873	-2.82321	1.49902e-14
AT1TE60180	Transposable_element	2118.63	-2.01748	2.11187e-14
AT5TE47200	Transposable_element	1814.8	-2.38155	2.76906e-14
ATCG00770	protein_coding	2103.98	-2.68567	3.40444e-14
AT4G36648	other_rna	871.34	-2.68306	4.85452e-14
AT1TE52110	Transposable_element	830.922	-2.96959	5.22049e-14
ATCG01200	pre_trna	7084.25	-3.24389	5.22049e-14
AT1TE52125	Transposable_element	987.626	-2.52557	6.04899e-14
AT2TE12030	Transposable_element	625.502	-2.95104	7.86673e-14
AT4TE16900	Transposable_element	2301.28	-2.52267	9.91584e-14
AT2G07811	pseudogene	5115.58	-3.36653	1.67856e-13
AT5TE42855	Transposable_element	3789.22	-2.35129	1.82951e-13
AT5TE55555	Transposable_element	265.336	-2.99205	1.92494e-13
AT4TE16400	Transposable_element	803.965	-2.62353	2.02945e-13
AT4TE14295	Transposable_element	1438.01	-2.95317	2.36805e-13
AT5TE41865	Transposable_element	919.562	-2.50447	2.39214e-13
AT1TE50860	Transposable_element	786.976	-2.57778	2.48877e-13
AT1TE55320	Transposable_element	814.067	-2.74951	2.63851e-13
AT3TE59620	Transposable_element	450.678	-2.80897	2.71481e-13
AT5TE43980	Transposable_element	1460.86	-3.23177	4.20376e-13
AT2TE24385	Transposable_element	788.124	-2.32957	4.62994e-13
AT1TE49850	Transposable_element	2529.77	-2.12101	4.9489e-13
AT3TE55395	Transposable_element	1381.28	-2.55112	5.15951e-13
ATCG01050	protein_coding	6197.71	-2.67125	5.24868e-13
AT4TE16565	Transposable_element	2838.35	-2.38625	6.11023e-13
AT1TE46575	Transposable_element	340.458	-3.43761	8.13119e-13
AT4TE18330	Transposable_element	399.665	-2.91083	1.28599e-12
AT5TE39425	Transposable_element	647.83	-3.23811	1.6612e-12
ATCG00930	pre_trna	6923.77	-3.18145	1.71772e-12
AT5TE40425	Transposable_element	465.375	-2.78661	2.3432e-12
AT5TE39830	Transposable_element	474.118	-2.81056	2.42004e-12
AT1TE41800	Transposable_element	468.417	-2.79001	3.38893e-12
AT5TE44730	Transposable_element	385.752	-2.43901	5.3057e-12
AT3TE63935	Transposable_element	1306.68	-2.22791	7.00274e-12
AT4TE15440	Transposable_element	1474.47	-2.72157	7.5983e-12
AT1TE52985	Transposable_element	406.121	-2.55789	7.61171e-12
AT5TE41870	Transposable_element	379.675	-3.23016	8.76004e-12
ATMG00730	protein_coding	5168.52	-3.31083	1.21496e-11
AT2G07734	protein_coding	1818.83	-3.84355	1.25836e-11
AT1TE51735	Transposable_element	1898.33	-2.46977	1.45914e-11
AT2TE17600	Transposable_element	920.795	-2.81083	1.48683e-11
AT5G27660	protein_coding	3033.11	-3.30522	1.48683e-11
AT3TE48120	Transposable_element	1139.67	-2.93103	2.17717e-11
AT2G07717	pseudogene	9298.43	-2.79819	2.26125e-11
AT2TE22505	Transposable_element	1008.51	-2.41607	2.8372e-11
ATMG00290	protein_coding	1704	-3.74171	2.87788e-11
AT2G07725	protein_coding	2215.63	-2.65655	3.41918e-11
AT2TE22520	Transposable_element	2361.05	-2.4175	4.16966e-11
AT3TE51735	Transposable_element	410.411	-2.68241	5.8425e-11
AT1TE48730	Transposable_element	1236.99	-2.30796	6.0499e-11
AT5G41471	small_nucleolar_rna	224.621	-4.09046	6.49263e-11
AT3TE51325	Transposable_element	1217.7	-2.73563	7.90996e-11
AT2G20721	small_nucleolar_rna	94.6473	-5.42119	8.70805e-11
AT4TE17205	Transposable_element	610.476	-2.5612	9.75651e-11
AT1TE47280	Transposable_element	899.447	-2.45733	1.0733e-10
ATCG00540	protein_coding	7658.57	-2.50412	1.11585e-10
AT1TE47500	Transposable_element	899.991	-2.45855	1.13227e-10
AT1TE48775	Transposable_element	1331.67	-2.29006	1.6393e-10
AT2TE21710	Transposable_element	813.897	-2.45892	2.69702e-10
AT5TE47160	Transposable_element	325.662	-2.53551	3.22888e-10
AT4TE17510	Transposable_element	416.853	-2.88147	4.62699e-10
AT1TE46690	Transposable_element	267.912	-2.99696	4.94487e-10
AT2TE19240	Transposable_element	188.519	-4.30074	6.08556e-10
AT1TE46755	Transposable_element	585.319	-2.37078	1.0241e-09
AT3TE53215	Transposable_element	1015.31	-2.21122	1.12953e-09
AT5TE37965	Transposable_element	367.088	-3.4761	1.23334e-09
AT5TE46220	Transposable_element	363.823	-2.6127	1.25786e-09
AT1G21580	protein_coding	873.737	-2.0093	1.35441e-09
ATMG00210	protein_coding	1760.67	-3.08839	1.55887e-09
AT4TE20125	Transposable_element	304.568	-2.54801	1.58696e-09
ATMG01380	ribosomal_rna	406.89	-2.82096	1.76952e-09
AT1TE46665	Transposable_element	746.154	-2.56056	1.97787e-09
AT3TE50630	Transposable_element	167.333	-2.82611	2.27785e-09
AT4TE15875	Transposable_element	591.126	-3.02303	2.56793e-09
AT5TE40275	Transposable_element	422.93	-2.59604	2.63448e-09
AT4TE18060	Transposable_element	656.087	-2.94933	2.99376e-09
ATMG00090	protein_coding	6458.59	-2.79271	3.90259e-09
AT2G07723	pseudogene	2352.2	-2.8883	3.94031e-09
AT1TE51065	Transposable_element	660.141	-2.71035	4.27502e-09
AT1G67120	protein_coding	785.515	-2.91976	4.44351e-09
AT5G24620	protein_coding	331.351	-3.37034	4.92558e-09
AT1G76810	protein_coding	1053.03	-2.19931	5.11895e-09
ATCG00450	pre_trna	2756.34	-4.93313	5.28064e-09
AT2TE19200	Transposable_element	290.938	-4.13587	5.30963e-09
AT1G20920	protein_coding	324.562	-2.90522	5.36788e-09
AT2G20722	small_nucleolar_rna	88.2808	-5.59286	6.23165e-09
AT3TE62025	Transposable_element	513.702	-2.72611	6.38356e-09
AT5G15022	other_rna	142.01	-4.82588	6.75744e-09
AT5TE42470	Transposable_element	16566.9	-2.32691	8.0001e-09
AT1G29418	protein_coding	1036.24	-2.35643	8.48431e-09
AT4TE15665	Transposable_element	886.444	-2.25691	1.00715e-08
AT4TE15670	Transposable_element	885.714	-2.25692	1.08842e-08
AT1G24880	protein_coding	4476.06	-2.22475	1.09236e-08
AT5TE47500	Transposable_element	252.236	-3.10856	1.18476e-08
AT5TE43815	Transposable_element	471.16	-2.58296	1.41405e-08
AT4G39364	small_nucleolar_rna	301.523	-3.58676	1.60051e-08
ATMG01080	protein_coding	15314.5	-4.02662	1.74088e-08
AT4TE15255	Transposable_element	852.609	-2.67554	1.79509e-08
AT5TE43255	Transposable_element	391.19	-3.02735	1.86203e-08
AT4G36520	protein_coding	240.877	-3.31654	2.1555e-08
AT2G05765	small_nucleolar_rna	477.777	-4.5551	2.34763e-08
AT1TE52200	Transposable_element	1476.81	-2.31412	2.35859e-08
AT3TE55355	Transposable_element	221.966	-2.83616	2.74879e-08
AT1TE46735	Transposable_element	254.885	-2.98119	3.0724e-08
AT3TE57310	Transposable_element	205.669	-3.30529	3.284e-08
AT2TE11350	Transposable_element	718.341	-2.99659	3.48977e-08
AT1TE52950	Transposable_element	401.993	-2.74121	3.57544e-08
AT3G47347	small_nucleolar_rna	129.522	-4.37722	4.168e-08
AT4TE19910	Transposable_element	528.426	-2.1484	4.42269e-08
ATMG00500	protein_coding	1041.35	-2.39915	4.72185e-08
AT2TE16860	Transposable_element	286.718	-2.72829	5.40526e-08
AT4TE17240	Transposable_element	437.695	-2.87354	6.17622e-08
AT3TE53690	Transposable_element	414.241	-3.01057	7.00745e-08
AT4G23760	protein_coding	248.396	-2.38866	7.29787e-08
ATCG00360	protein_coding	3260.97	-2.8905	9.57265e-08
ATCG00130	protein_coding	7568.42	-2.17421	1.25641e-07
AT3G07215	other_rna	199.415	-3.69099	1.29734e-07
AT5TE43190	Transposable_element	417.553	-3.20089	1.30012e-07
ATMG00560	protein_coding	2587.55	-3.63637	1.30012e-07
ATCG00020	protein_coding	256615	-2.59385	1.39282e-07
AT1TE49845	Transposable_element	227.511	-2.39429	1.41134e-07
AT5TE36945	Transposable_element	330.341	-3.31412	1.43951e-07
AT1G29071	small_nucleolar_rna	100.541	-5.4624	1.4648e-07
AT1TE41230	Transposable_element	939.596	-2.31217	1.50788e-07
AT1TE54480	Transposable_element	1651.9	-2.31443	1.5124e-07
AT4TE08995	Transposable_element	219.089	-3.35736	1.95739e-07
AT2G07727	protein_coding	6682.61	-3.47863	2.34781e-07
AT4TE10675	Transposable_element	215.202	-2.7914	2.50658e-07
AT3TE53995	Transposable_element	1541.13	-2.04615	2.58054e-07
AT5TE43990	Transposable_element	370.001	-3.44224	2.58054e-07
AT2G07747	pseudogene	1277.88	-2.58355	2.72484e-07
ATMG01390	ribosomal_rna	5251.87	-3.04596	2.91188e-07
ATCG00180	protein_coding	3569.97	-2.28966	3.34465e-07
AT3G50370	protein_coding	1293.01	-1.93258	3.64556e-07
AT3TE61535	Transposable_element	258.107	-2.46837	3.64556e-07
AT4TE08465	Transposable_element	811.397	-3.1001	4.47881e-07
AT3TE61555	Transposable_element	245.046	-2.46828	4.50289e-07
AT4TE08475	Transposable_element	810.873	-3.09856	4.54299e-07
AT3TE62685	Transposable_element	1289.79	-2.19659	5.09947e-07
ATCG00220	protein_coding	10284.8	-2.8384	5.09947e-07
AT3TE51460	Transposable_element	1508.81	-2.19829	5.894e-07
AT4TE15260	Transposable_element	163.705	-2.70558	6.09161e-07
AT2G35382	small_nucleolar_rna	72.9618	-7.1277	6.10471e-07
AT5TE49770	Transposable_element	94.981	-3.44228	6.10471e-07
AT1TE51040	Transposable_element	4214.15	-2.72715	7.6787e-07
AT1TE47365	Transposable_element	345.087	-2.35284	9.21939e-07
AT5TE43985	Transposable_element	281.412	-3.63837	9.26243e-07
AT4TE13035	Transposable_element	371.529	-2.96598	1.08358e-06
AT5TE43240	Transposable_element	113.259	-3.65986	1.16695e-06
AT1TE47145	Transposable_element	341.362	-2.35799	1.17883e-06
AT1G25098	other_rna	7302.86	-2.23341	1.21057e-06
AT5TE46210	Transposable_element	706.055	-2.78751	1.21057e-06
AT4TE13315	Transposable_element	88.1974	-3.72629	1.28618e-06
AT1TE48020	Transposable_element	219.388	-3.08988	1.36136e-06
AT2G35750	protein_coding	3842.12	-3.95281	1.49265e-06
AT3TE48135	Transposable_element	186.024	-4.53749	1.49792e-06
AT5TE43855	Transposable_element	239.302	-3.26498	1.69128e-06
AT5TE38995	Transposable_element	194.552	-4.26729	1.69366e-06
AT2G07671	protein_coding	17526.5	-2.93056	1.75099e-06
AT5G54075	small_nucleolar_rna	2242.99	-3.69545	1.75099e-06
AT1TE46330	Transposable_element	106.936	-3.48672	1.91594e-06
AT3G25840	protein_coding	749.894	-1.88506	2.18715e-06
AT5TE43385	Transposable_element	776.748	-2.32261	2.21705e-06
AT4TE16085	Transposable_element	277.625	-3.86119	2.21803e-06
AT3TE57995	Transposable_element	22.4497	-7.08386	2.2384e-06
AT3TE57920	Transposable_element	22.2059	-7.07581	2.28275e-06
AT3TE47975	Transposable_element	271.749	-2.99194	2.39616e-06
AT4TE16080	Transposable_element	1051.98	-2.51533	2.75134e-06
ATCG01280	protein_coding	6071.33	-2.94585	2.75177e-06
AT3G55485	other_rna	119.888	-6.23046	3.36683e-06
AT2G18440	other_rna	1570.05	-2.05164	3.39991e-06
AT4G39363	small_nucleolar_rna	175.096	-2.9557	3.91282e-06
AT4G26365	small_nucleolar_rna	38.7846	-6.14412	4.21158e-06
AT1TE43030	Transposable_element	75.8962	-3.17422	4.32156e-06
AT1G74456	small_nucleolar_rna	67.1637	-4.10528	5.36518e-06
AT2TE17725	Transposable_element	259.22	-2.29988	5.40938e-06
AT4TE15945	Transposable_element	920.158	-2.68924	5.5159e-06
AT3G21805	small_nucleolar_rna	134.354	-4.99263	5.71611e-06
AT1G03746	small_nucleolar_rna	114.192	-5.30582	5.77598e-06
ATCG00190	protein_coding	2837.91	-2.02347	5.91208e-06
ATMG00070	protein_coding	3511.72	-2.5874	5.94596e-06
ATMG00690	protein_coding	1150.98	-4.1391	7.52493e-06
AT2TE09640	Transposable_element	254.794	-2.69455	7.52634e-06
AT5G18255	other_rna	295.747	-3.8393	8.1766e-06
AT3TE55365	Transposable_element	588.383	-3.00101	8.55374e-06
AT1G56280	protein_coding	4698.14	-1.73698	9.02526e-06
AT3TE60510	Transposable_element	310.366	-2.85402	9.11202e-06
ATCG00860	protein_coding	6038.87	-2.88699	9.13433e-06
ATCG00710	protein_coding	4019.54	-2.76321	9.92868e-06
AT5G45095	protein_coding	1452.17	-1.79689	1.06267e-05
AT1TE42890	Transposable_element	1361.38	-1.60589	1.09417e-05
AT4TE19135	Transposable_element	532.256	-2.70663	1.14373e-05
AT2TE26380	Transposable_element	203.666	-3.30307	1.16657e-05
ATCG00905	protein_coding	4100.92	-2.35294	1.32229e-05
AT3G01313	small_nucleolar_rna	89.0438	-4.03728	1.32735e-05
AT4G34110	protein_coding	6451.73	-1.84132	1.33233e-05
AT4G31570	protein_coding	584.571	-3.41647	1.5024e-05
AT3TE57395	Transposable_element	390.29	-2.6613	1.56079e-05
AT4TE19150	Transposable_element	475.518	-2.6275	1.61394e-05
ATCG00520	protein_coding	2170.48	-2.36558	1.61394e-05
AT3G57765	small_nuclear_rna	840.961	-4.61851	1.63442e-05
AT2G16600	protein_coding	15625.6	1.80304	1.64219e-05
AT5G45570	protein_coding	406.646	-2.67335	1.73222e-05
AT2TE21450	Transposable_element	250.72	-2.85008	1.76022e-05
AT2G07815	protein_coding	900.74	-3.33938	2.05604e-05
AT5G06165	other_rna	580.062	-3.55914	2.05604e-05
AT3TE50940	Transposable_element	314.329	-2.52783	2.15962e-05
AT5G46160	protein_coding	180.226	3.32078	2.29773e-05
AT2TE11920	Transposable_element	1276.34	-2.66773	2.29857e-05
AT4G15440	protein_coding	331.865	-2.59448	2.60966e-05
AT2TE21480	Transposable_element	298.226	-2.81093	2.62079e-05
AT5TE42335	Transposable_element	64.2068	-3.25809	2.74597e-05
ATCG00380	protein_coding	5430.14	-1.97026	2.74973e-05
AT4TE21170	Transposable_element	407.505	-1.94903	2.90639e-05
AT3G57690	protein_coding	2587.75	-2.98066	3.00544e-05
AT3G29080	protein_coding	41.4941	-4.04828	3.10056e-05
AT3TE58895	Transposable_element	381.093	-3.11758	3.27633e-05
AT3TE54710	Transposable_element	185.462	-3.35864	3.92604e-05
AT5G53902	small_nucleolar_rna	2126.74	-5.26615	3.95734e-05
AT3G42640	protein_coding	687.289	-3.85315	4.39363e-05
ATMG00180	protein_coding	2150.47	-2.8719	4.39778e-05
AT2TE21505	Transposable_element	345.672	-2.80942	4.57942e-05
AT2G46192	other_rna	238.48	-2.59486	4.97944e-05
AT4TE18315	Transposable_element	271.007	-2.61074	5.72992e-05
AT1G48090	protein_coding	1261.78	-2.1705	6.54678e-05
AT4G05631	protein_coding	920.367	-4.1474	6.7296e-05
AT2G42270	protein_coding	194.25	-2.78084	6.91517e-05
AT2TE11805	Transposable_element	173.546	-3.76214	6.98522e-05
AT2G07715	protein_coding	1722.01	-3.10823	7.76935e-05
AT5G25560	protein_coding	1016.42	-2.21944	7.76935e-05
AT5G28810	protein_coding	134.01	-4.89298	7.94567e-05
AT4TE18055	Transposable_element	84.6647	-2.58971	8.12868e-05
AT5TE44070	Transposable_element	143.782	-3.61655	9.73189e-05
AT5TE42680	Transposable_element	72.2136	-3.52729	0.000101325
AT1TE48660	Transposable_element	155.13	-3.65666	0.000101756
AT5G33251	pseudogene	973.369	-1.79781	0.000101756
AT4TE18670	Transposable_element	217.266	-3.06576	0.000107952
ATMG01190	protein_coding	16659.4	-2.61475	0.000114431
AT1G75310	protein_coding	311.782	-2.22239	0.000117986
AT1TE48835	Transposable_element	176.802	-3.59869	0.000119684
AT3TE54705	Transposable_element	246.754	-3.84767	0.0001211
AT2G39280	protein_coding	256.097	-2.92763	0.000125731
AT1G55860	protein_coding	1533.02	-2.12111	0.00013059
AT2G33830	protein_coding	1426.47	2.86506	0.000134736
AT3TE53985	Transposable_element	909.933	-2.24931	0.000135525
AT1TE47605	Transposable_element	478.478	-2.66636	0.000142929
AT2G39580	protein_coding	358.428	-2.92081	0.000145594
AT5TE43615	Transposable_element	308.124	-2.21564	0.000149871
ATCG01230	protein_coding	4089.3	-2.2006	0.000151667
AT5G21020	protein_coding	1445.35	-1.57666	0.000159928
AT1TE36570	Transposable_element	280.164	-2.06337	0.000172268
ATCG00070	protein_coding	1974.01	-3.53506	0.000177089
AT2TE16865	Transposable_element	229.039	-3.12072	0.000177169
AT2TE20870	Transposable_element	125.391	-3.65217	0.000177169
ATCG00720	protein_coding	16494.7	-2.60095	0.000177169
AT3G24612	small_nucleolar_rna	27.4318	-5.96357	0.000178666
AT2TE22335	Transposable_element	342.667	-2.29896	0.000182792
AT3G24614	small_nucleolar_rna	23.2497	-5.99556	0.000187852
ATCG01130	protein_coding	6599.35	-1.96715	0.000205607
ATMG01280	protein_coding	1478.95	-3.72822	0.000205607
AT3TE55370	Transposable_element	285.061	-3.11372	0.000206451
AT3G15030	protein_coding	357.405	-2.20889	0.000207038
AT1TE48035	Transposable_element	1058.38	-2.40354	0.000224688
AT5TE44355	Transposable_element	497.148	-2.50133	0.000235732
AT1G79245	pseudogene	1213.17	-2.5086	0.000239979
ATCG00170	protein_coding	4299.04	-1.77878	0.000239979
AT2G35744	small_nucleolar_rna	36.4812	-5.57295	0.000241097
AT3G47348	small_nucleolar_rna	119.923	-3.7122	0.000241097
AT5TE43805	Transposable_element	237.608	-2.37857	0.000241097
AT2G07785	protein_coding	1033.23	-2.89857	0.000249591
AT5TE43325	Transposable_element	121.671	-3.75793	0.000252224
AT2G43150	protein_coding	301.009	-2.95469	0.000267849
AT5TE42010	Transposable_element	78.1591	-2.85428	0.000271124
AT4G38950	protein_coding	518.908	-2.37005	0.000277245
AT3TE57355	Transposable_element	137.451	-3.37353	0.000283263
AT1TE45135	Transposable_element	594.732	-2.55329	0.000297076
AT2TE18885	Transposable_element	96.6122	-5.19154	0.000298739
ATCG01100	protein_coding	2461.85	-2.78091	0.000311997
AT1TE51045	Transposable_element	104.97	-3.8488	0.000330232
AT4G03205	protein_coding	179.081	-2.70491	0.000343364
AT4TE18245	Transposable_element	1140.15	-2.97093	0.000344338
AT5TE39045	Transposable_element	62.4505	-3.08435	0.000354071
AT1TE45790	Transposable_element	267.848	-3.15081	0.00038267
AT1TE48765	Transposable_element	195.252	-2.29526	0.000384763
AT1TE52590	Transposable_element	1366.41	-1.71745	0.000385455
ATCG01010	protein_coding	1103.28	-2.17159	0.0003925
AT1G53200	protein_coding	95.6505	-2.98866	0.000402966
AT5TE44205	Transposable_element	128.036	-3.30353	0.000440061
AT2TE20590	Transposable_element	70.5207	-2.79093	0.000443529
AT2TE16230	Transposable_element	340.463	-2.33387	0.000470175
AT2G24580	protein_coding	70.9476	-2.88887	0.000490779
ATMG00516	protein_coding	1771.91	-3.01011	0.000552998
AT1G74170	protein_coding	111.511	-2.84387	0.00056187
ATMG01370	protein_coding	248.51	-2.95404	0.000580783
AT1TE48745	Transposable_element	191.688	-2.26338	0.000618072
AT2TE13350	Transposable_element	304.543	-2.83536	0.000637844
AT1G07728	other_rna	78.8933	-2.89993	0.000669831
AT3TE56720	Transposable_element	180.049	-2.76603	0.000669831
AT3TE59100	Transposable_element	158.827	-3.00959	0.000680268
AT2TE18415	Transposable_element	459.85	-2.96034	0.000699642
ATCG01270	protein_coding	710.655	-3.62787	0.000705628
ATCG00530	protein_coding	2069.57	-2.8656	0.00070862
AT5G13225	small_nucleolar_rna	40.7021	-4.75981	0.000731203
AT3TE60460	Transposable_element	1130.46	-2.45802	0.000749948
AT3TE56630	Transposable_element	109.205	-3.36112	0.000770843
AT2G07773	protein_coding	174.185	-3.41013	0.000802231
AT2G14285	protein_coding	134.111	-2.31706	0.000802231
ATCG00680	protein_coding	34194.4	-2.56952	0.000837773
ATCG00870	protein_coding	710.473	-3.65451	0.000865593
AT1TE53095	Transposable_element	306.765	-2.09152	0.000868981
AT1TE59745	Transposable_element	372.678	-2.3625	0.000887422
AT2G07726	pseudogene	978.36	-4.95658	0.000937607
AT5TE43940	Transposable_element	199.159	-2.262	0.000957018
AT2TE10980	Transposable_element	187.863	-2.24312	0.000982934
ATMG00160	protein_coding	4295.25	-3.03356	0.000995222
AT1G08115	small_nuclear_rna	1122.28	-3.47786	0.00100323
AT1G74453	small_nucleolar_rna	43.6124	-4.32048	0.00101063
AT2G21380	protein_coding	508.429	-2.09974	0.00102063
AT1TE46385	Transposable_element	35.0396	-3.27418	0.00103893
AT3G50825	small_nucleolar_rna	48.5706	-4.70666	0.00103893
AT3TE56700	Transposable_element	513.688	-3.24231	0.0010534
ATCG00430	protein_coding	2042.59	-2.35411	0.00114944
AT2TE16945	Transposable_element	1930.35	-1.71276	0.00116299
AT2TE19190	Transposable_element	36.3982	-4.01176	0.00118713
AT2G16586	protein_coding	1446.1	-3.92804	0.00119104
AT1TE52990	Transposable_element	112.871	-5.11546	0.00120034
AT1G68890	protein_coding	348.44	-2.35976	0.0012191
ATCG00510	protein_coding	599.782	-2.58701	0.0012302
AT5TE44770	Transposable_element	828.016	-2.39754	0.00125939
AT5TE51685	Transposable_element	1059.98	-1.69916	0.00127522
AT4TE13505	Transposable_element	160.648	-2.36734	0.00127957
AT4TE18755	Transposable_element	40.3546	-3.23692	0.00136349
AT3TE57050	Transposable_element	294.611	-2.36472	0.00138483
AT2G11851	protein_coding	169.555	-2.97946	0.00147914
AT1TE28830	Transposable_element	194.712	-2.24562	0.00148986
AT2TE23870	Transposable_element	344.759	-1.77496	0.00159192
AT5TE22990	Transposable_element	147.489	-2.8232	0.00162912
AT2G43970	protein_coding	948.998	-1.85326	0.00164197
AT4TE18630	Transposable_element	120.068	-2.80358	0.00167453
AT2G07698	protein_coding	21699.8	-2.47674	0.00168719
AT4TE18655	Transposable_element	26.7872	-5.51282	0.00168719
AT5G28400	protein_coding	191.894	-3.08199	0.00171008
AT1G41890	pseudogene	130.32	-3.28455	0.00180768
AT1TE52210	Transposable_element	270.105	-2.48097	0.00181887
AT2G40010	protein_coding	229.347	-2.18359	0.00184656
AT3TE64435	Transposable_element	821.336	-2.09949	0.00184656
AT1TE51645	Transposable_element	95.5893	-3.06086	0.00184934
AT2TE24525	Transposable_element	862.027	-2.24087	0.00187068
AT4G08593	protein_coding	685.356	-1.8995	0.00194258
AT3TE51660	Transposable_element	185.703	-2.87854	0.00203503
AT3TE43630	Transposable_element	22.326	-4.53389	0.00206139
AT3TE54690	Transposable_element	121.512	-2.55375	0.00206621
AT2G35747	small_nucleolar_rna	38.5951	-3.90356	0.00216846
AT3G13525	small_nucleolar_rna	55.9785	-3.7085	0.00230939
AT5G47500	protein_coding	560.494	-1.8206	0.00239137
AT2TE16310	Transposable_element	376.736	-2.48773	0.00246546
AT5TE41795	Transposable_element	312.156	-2.00392	0.00249123
AT5TE44415	Transposable_element	141.953	-2.52275	0.00249123
ATCG00620	pre_trna	100.028	-3.43248	0.00249123
AT3TE54695	Transposable_element	158.027	-2.54347	0.00259498
AT4G00780	protein_coding	381.064	1.92618	0.00260463
AT1TE45200	Transposable_element	320.937	-2.74175	0.00273004
AT1G79075	other_rna	1397.1	-1.84661	0.00274861
AT3G58490	protein_coding	253.981	-2.12176	0.00278587
AT5G54910	protein_coding	171.383	-2.44488	0.00280844
AT3TE54700	Transposable_element	152.186	-2.53726	0.00289009
AT2TE10975	Transposable_element	39.988	-4.88235	0.0029419
ATCG00050	protein_coding	148.116	-4.31021	0.00299549
AT5TE42265	Transposable_element	123.624	-2.72443	0.00361
AT3G11964	protein_coding	751.06	-1.87933	0.00370509
ATMG00510	protein_coding	5152.86	-3.23204	0.00370509
AT5G55660	protein_coding	711.977	-1.62034	0.00390514
AT2G07706	protein_coding	260.811	-3.00419	0.00401737
AT2G07716	pseudogene	971.772	-2.51201	0.0040392
AT3G56825	small_nuclear_rna	780.605	-2.83505	0.0040392
AT1TE46805	Transposable_element	51.6541	-3.13437	0.00415274
AT5TE46485	Transposable_element	52.8608	-2.82937	0.00417431
AT3TE49545	Transposable_element	10.1047	-5.90078	0.00417969
AT3G19050	protein_coding	384.095	-2.47154	0.00420792
AT5TE41420	Transposable_element	171.66	-3.8435	0.00432683
AT3TE48150	Transposable_element	147.08	-2.03377	0.00438785
AT4G39361	small_nucleolar_rna	74.9668	-3.63056	0.00439586
ATMG01360	protein_coding	11275.7	-1.9319	0.00452175
AT1G61563	protein_coding	1904.3	-2.69771	0.00530281
AT1G26230	protein_coding	172.998	-2.83059	0.00535416
AT1G71340	protein_coding	1231.99	-1.65537	0.00542535
ATMG00570	protein_coding	880.848	-2.56277	0.00542535
AT4G25730	protein_coding	724.392	-1.82086	0.00544509
AT5TE46910	Transposable_element	45.7772	-3.20468	0.00556478
AT2TE18895	Transposable_element	14.7583	-5.35581	0.00582684
AT1TE41625	Transposable_element	35.165	-5.43114	0.00584146
AT4TE18785	Transposable_element	49.4232	-3.52849	0.00604776
ATMG00020	ribosomal_rna	21919.8	-2.05093	0.00608492
ATCG00560	protein_coding	3493.38	-2.30919	0.00608546
AT5TE39140	Transposable_element	153.077	-2.65658	0.00608592
AT2TE19625	Transposable_element	337.838	-2.36953	0.00622908
ATCG01120	protein_coding	504.774	-2.21847	0.00627677
AT2G39030	protein_coding	270.75	5.00796	0.00629354
AT3TE56710	Transposable_element	214.401	-2.62074	0.00655963
AT3TE52305	Transposable_element	759.764	-2.04693	0.00661379
AT2G36792	other_rna	17.5118	-5.03807	0.00670084
AT2TE38910	Transposable_element	48.8651	-3.79821	0.0067063
AT3G49540	protein_coding	2161.71	-2.3554	0.00682365
AT1G20015	small_nucleolar_rna	40.7887	-3.45546	0.00685871
AT2G14878	other_rna	328.384	-1.88362	0.00706406
AT3TE56640	Transposable_element	278.936	-2.39731	0.00715427
AT2G25964	protein_coding	102.298	-2.33039	0.00728588
AT5TE42015	Transposable_element	91.3555	-3.25963	0.00731386
AT5G02670	protein_coding	55.4716	-3.81144	0.00734258
AT3TE51150	Transposable_element	765.957	-2.44304	0.00758964
AT3G30385	protein_coding	219.162	4.95788	0.00766243
AT1G15580	protein_coding	23.1771	4.86718	0.00776221
AT4TE18650	Transposable_element	162.762	-2.59078	0.00783292
AT4TE18720	Transposable_element	124.427	-2.94485	0.00786483
AT3G30387	protein_coding	216.043	4.94683	0.00831193
ATCG00840	protein_coding	1605.1	-2.40549	0.00831795
AT3G30720	protein_coding	762.449	-2.42881	0.00890339
AT5TE38285	Transposable_element	89.6117	-4.0782	0.00890339
AT3TE59605	Transposable_element	23.2338	-3.92457	0.00904029
AT1TE53060	Transposable_element	61.0648	-5.02032	0.0091666
AT4G11420	protein_coding	1998.36	-1.44371	0.00964889
AT2G33810	protein_coding	1087	-1.7626	0.00984106
AT4TE13485	Transposable_element	234.172	-2.45648	0.00986601
AT3TE57315	Transposable_element	56.6806	-3.06081	0.0100667
AT5TE38340	Transposable_element	177.313	-2.7324	0.0102317
AT2TE08785	Transposable_element	90.575	-3.44537	0.0105434
AT4G26255	other_rna	110.306	-2.74164	0.0109047
AT2G07808	pseudogene	109.058	-4.62492	0.0109789
AT1G18745	other_rna	93.501	-2.76287	0.0121874
AT3G14470	protein_coding	30.803	-4.36978	0.0121874
AT1G79280	protein_coding	1003.07	-1.75503	0.0125678
AT1G29465	protein_coding	135.366	-2.2316	0.0129915
AT4G15180	protein_coding	592.031	-1.84884	0.0135365
ATMG01270	protein_coding	401.938	-2.4529	0.0135365
AT3TE59155	Transposable_element	60.9741	-2.93512	0.0136302
AT1TE46770	Transposable_element	26.4317	-3.49258	0.0139349
ATMG00280	protein_coding	651.97	-3.99723	0.0143398
AT1TE47780	Transposable_element	47.096	-2.85699	0.0143451
ATCG00410	pre_trna	695.267	-4.23672	0.0143451
AT3TE62700	Transposable_element	75.9034	-2.72078	0.0148243
AT4G02430	protein_coding	120.558	-2.64185	0.0148243
AT3G50690	protein_coding	549.495	-1.60689	0.0148908
AT1G71430	protein_coding	87.2212	2.79832	0.0148971
AT3G19550	protein_coding	181.017	2.73621	0.0150489
ATCG00420	protein_coding	1812.55	-2.01803	0.0150964
AT1G79830	protein_coding	797.561	-1.8127	0.0152088
AT1G67990	protein_coding	1130.66	1.87391	0.0153682
AT5G15190	protein_coding	61.5218	3.55161	0.0156911
AT2TE19620	Transposable_element	43.4504	-3.82883	0.0158441
AT4G35630	protein_coding	859.642	1.66552	0.0161222
ATMG00110	protein_coding	380.979	-4.23438	0.0163867
AT2G10735	pseudogene	11.5017	-5.0087	0.0165042
AT3G59068	other_rna	248.024	-2.83846	0.0166381
AT3TE51250	Transposable_element	118.928	-2.61372	0.0169239
AT1TE54655	Transposable_element	74.6793	-2.47761	0.0173213
AT2TE17625	Transposable_element	146.016	-2.42375	0.0177325
AT3G05500	protein_coding	1313.79	1.65683	0.0183163
ATCG00270	protein_coding	19006.3	-2.42422	0.0183355
ATCG00300	protein_coding	3586.15	-2.1322	0.0190411
AT4G01470	protein_coding	197.629	3.10654	0.019228
AT2G30620	protein_coding	2285.61	1.78122	0.0192716
AT1TE46140	Transposable_element	87.2188	-2.08255	0.0193443
AT1G04120	protein_coding	1011.72	-1.58032	0.0195654
AT1G26558	other_rna	846.775	-2.1238	0.0195654
AT2TE11890	Transposable_element	109.986	-3.65199	0.0198014
AT4G39590	protein_coding	17.7827	4.68641	0.0199053
AT1TE29570	Transposable_element	847.501	-2.1237	0.0199312
AT4TE15420	Transposable_element	117.361	-2.62381	0.020183
AT1G10660	protein_coding	121.194	-3.02199	0.0202368
AT4G32420	protein_coding	429.748	-1.83692	0.020256
AT4G31060	protein_coding	44.2712	-3.4564	0.0202597
AT3TE51330	Transposable_element	61.0019	-5.11171	0.0203654
AT3G01345	protein_coding	1117.36	-1.81504	0.020613
AT5G01595	other_rna	88.9282	-2.2249	0.0206441
AT3TE55340	Transposable_element	762.632	-2.32316	0.0206525
AT3G16500	protein_coding	415.147	1.99125	0.0207634
AT2G48060	protein_coding	404.415	-2.01721	0.021124
AT3TE63855	Transposable_element	8.60581	-5.10304	0.0211483
AT5TE41425	Transposable_element	85.9624	-3.13788	0.0211483
AT1G15200	protein_coding	456.155	-1.8252	0.0213018
AT3TE50760	Transposable_element	605.921	-2.58558	0.021652
AT3TE57305	Transposable_element	54.1	-3.07797	0.021652
AT5G04020	protein_coding	171.263	-2.648	0.021652
AT5G09585	small_nuclear_rna	562.585	-2.97001	0.021652
AT4G37820	protein_coding	187.208	-2.28332	0.0220598
AT3G25495	pseudogene	93.2623	-3.76003	0.0224734
AT1G26150	protein_coding	143.025	-2.66091	0.0241927
AT1G65010	protein_coding	1262.29	-1.52182	0.0242083
ATMG00790	pre_trna	30.3768	-4.10864	0.0243636
AT1G64790	protein_coding	1231.88	-1.7129	0.0244115
AT3TE55360	Transposable_element	232.2	-2.67629	0.0247926
AT2TE17640	Transposable_element	33.4998	-3.80856	0.0254282
AT2G02400	protein_coding	182.273	2.18921	0.0255834
AT5G59970	protein_coding	3171.24	1.39473	0.0256934
AT5TE40575	Transposable_element	387.295	-2.48754	0.0260135
AT2G07783	pseudogene	966.147	-1.89972	0.0265604
ATCG01300	protein_coding	1611.75	-2.29615	0.0265604
AT1G65370	protein_coding	568.85	-2.02704	0.0266665
ATCG01220	pre_trna	73.5277	-4.41373	0.0266665
AT1TE79940	Transposable_element	30.5559	-4.73976	0.0276219
AT2TE20260	Transposable_element	198.818	-2.89818	0.0276436
AT1G54530	protein_coding	16.6428	4.60808	0.027926
AT5G42960	protein_coding	305.577	1.83186	0.0283137
AT2G07753	pre_trna	29.7619	-4.05972	0.0284008
AT3TE63465	Transposable_element	248.783	-1.65224	0.0285749
AT5G27860	protein_coding	515.322	-1.64264	0.0290344
AT1TE53050	Transposable_element	55.6598	-3.3963	0.0293154
AT4TE14130	Transposable_element	91.6559	-2.33365	0.0293376
AT1G05460	protein_coding	189.145	-1.98234	0.0295757
AT1G25054	protein_coding	2080.8	-2.0191	0.0302621
ATMG00040	protein_coding	5312.6	-3.03778	0.0304301
AT5G27830	protein_coding	93.7771	2.43208	0.031261
AT1TE28460	Transposable_element	69.6928	-2.66602	0.0312814
ATCG00910	pre_trna	74.3647	-4.36073	0.0312814
AT3TE53630	Transposable_element	60.6978	-2.59298	0.0313679
AT2G46110	protein_coding	63.8747	2.77928	0.0315261
AT3TE53865	Transposable_element	68.964	-2.82188	0.0324969
AT2G17930	protein_coding	1155.96	-2.26301	0.0326031
ATCG00900	protein_coding	10752.1	-1.69735	0.0326031
AT1G70320	protein_coding	1912.43	-1.71273	0.033498
AT5G14840	pseudogene	117.942	-2.6935	0.0342402
AT5TE41265	Transposable_element	51.3417	-3.43117	0.0342402
AT1G48940	protein_coding	101.98	3.24318	0.0354633
AT2G29210	protein_coding	514.323	-1.60182	0.0358272
AT3G13277	other_rna	51.8193	-4.5412	0.0358716
AT1G72410	protein_coding	446.205	-1.78484	0.035933
AT3TE57445	Transposable_element	131.022	-2.42771	0.0360824
AT4G15258	small_nucleolar_rna	111.51	-2.41149	0.0361287
AT5G39520	protein_coding	124.402	4.21432	0.0361287
AT1TE28405	Transposable_element	66.3213	-2.65418	0.0363313
AT2G07695	protein_coding	1232.02	-3.25659	0.0366719
AT5G17340	protein_coding	86.3377	3.13784	0.0366943
AT1G12013	small_nucleolar_rna	110.947	-3.25892	0.0369516
AT1TE51000	Transposable_element	53.9159	-2.93639	0.037125
AT3G22142	protein_coding	155.175	-2.22928	0.0371981
AT2G42365	other_rna	15.6621	-4.5448	0.0376954
AT2G07696	protein_coding	599.897	-2.19103	0.0379195
AT2G43320	protein_coding	85.1909	3.47485	0.0384044
AT2G14255	protein_coding	120.601	-2.70551	0.0389339
AT1TE51155	Transposable_element	54.7247	-3.46513	0.0401787
AT3G58196	small_nucleolar_rna	23.5621	-3.44846	0.0401787
AT3TE53745	Transposable_element	146.146	-1.66898	0.0407169
AT1TE48670	Transposable_element	66.8163	-4.24237	0.0408101
AT3G18100	protein_coding	68.3883	-3.51654	0.0418262
AT4TE15805	Transposable_element	16.3072	-4.4687	0.0418503
AT3G07040	protein_coding	61.2726	4.20232	0.0446396
AT1G65440	protein_coding	926.167	-1.56658	0.044996
AT1TE53390	Transposable_element	203.964	-2.36526	0.0466152
AT2TE11145	Transposable_element	137.929	-2.86402	0.0468
AT4TE21190	Transposable_element	91.7072	-3.50971	0.0469192
AT1TE46265	Transposable_element	185.973	-2.719	0.0482764
AT4TE19780	Transposable_element	93.9984	-2.63509	0.0485356
AT3TE50595	Transposable_element	995.602	-2.31854	0.0495213
AT2G14710	protein_coding	16.6797	4.53215	0.0502302
AT2G16210	protein_coding	173.034	1.80642	0.0502302
AT5TE41415	Transposable_element	53.4683	-4.51226	0.0502302
ATCG00440	protein_coding	10742.5	-1.71085	0.0502399
AT1G24210	protein_coding	29.3431	3.30102	0.0514428
AT3G18590	protein_coding	124.747	2.80526	0.0520072
AT3G13682	protein_coding	21.2898	-3.72238	0.0520937
AT4G00975	other_rna	60.45	-3.97067	0.0520937
AT3TE61400	Transposable_element	18.4886	-3.96568	0.0521532
AT5G20700	protein_coding	1132.08	-2.08161	0.052654
AT5G61455	small_nuclear_rna	498.69	-3.37988	0.0557897
AT2TE19195	Transposable_element	23.7263	-4.25257	0.0558813
AT5G40450	protein_coding	1194.86	-1.89285	0.0563294
AT3G46080	protein_coding	33.3985	4.53882	0.0604702
AT1G13350	protein_coding	185.637	-2.18475	0.0609409
ATCG00670	protein_coding	6551.07	-2.03204	0.0609506
AT1G22500	protein_coding	11.9681	-4.57408	0.0611246
AT4G30990	protein_coding	556.074	-2.14196	0.0611538
AT1G80930	protein_coding	588.633	-1.53888	0.0617918
AT4TE15280	Transposable_element	50.527	-3.87463	0.0617918
AT4G10930	protein_coding	169.012	-2.91107	0.0618057
AT5G28646	protein_coding	31.342	4.28315	0.0619546
AT3G16640	protein_coding	42027.6	-1.34392	0.0624119
AT1G20100	protein_coding	748.926	-1.49723	0.062549
AT2TE13750	Transposable_element	12.0166	-4.78294	0.062549
AT5TE42940	Transposable_element	36.5745	-2.70828	0.062549
AT2TE16030	Transposable_element	99.7527	-2.65153	0.0661018
AT3G11120	protein_coding	4649.66	-1.42445	0.0663243
AT3TE50655	Transposable_element	960.45	-2.17051	0.0663243
ATCG00760	protein_coding	987.044	-2.56791	0.0663243
AT2TE17565	Transposable_element	109.202	-3.20499	0.0679247
AT5TE44055	Transposable_element	34.7262	-3.60469	0.0687356
AT1G30890	protein_coding	499.549	1.59042	0.0698532
AT3TE50575	Transposable_element	8.90173	-4.7316	0.0698532
ATCG00750	protein_coding	2084.48	-1.63766	0.070581
AT2TE50690	Transposable_element	14.3715	4.53793	0.0714072
AT2G01100	protein_coding	186.742	-1.98138	0.0717113
AT1G56660	protein_coding	202.856	-3.11525	0.0719434
AT4G36980	protein_coding	471.351	-1.92294	0.0722015
AT4TE17480	Transposable_element	49.5249	-2.91142	0.0728635
AT2G43375	other_rna	323.534	-2.72343	0.0732661
AT2TE17655	Transposable_element	123.741	-2.88385	0.0745599
AT2TE17660	Transposable_element	123.741	-2.88385	0.0745599
AT1G10320	protein_coding	52.6067	-3.71782	0.0751783
AT1G14130	protein_coding	74.2445	3.00791	0.0752605
AT1G74250	protein_coding	137.085	-2.11605	0.0752933
AT2G07731	pseudogene	3210.31	-2.98511	0.0755962
AT2G07798	protein_coding	201.454	-3.92393	0.0760815
AT3TE60870	Transposable_element	494.425	-1.92158	0.0782627
AT2TE12825	Transposable_element	43.4706	-3.12959	0.0798271
AT2G22795	protein_coding	579.136	-1.97172	0.0800041
AT3TE53045	Transposable_element	193.671	-2.75151	0.0800041
AT5G63080	protein_coding	67.7367	-2.68591	0.0800041
AT5TE43580	Transposable_element	66.3469	-2.85415	0.081254
AT1TE47545	Transposable_element	12.3186	-4.71566	0.0833819
AT2TE13440	Transposable_element	384.928	-2.33467	0.0833819
AT3TE60200	Transposable_element	94.0472	-2.12674	0.0837552
AT5G16360	protein_coding	71.097	3.03213	0.0837552
AT3G60570	protein_coding	33.3053	4.10416	0.0859946
AT3G16420	protein_coding	36.5157	3.41226	0.0862041
AT1G03935	small_nucleolar_rna	29.0456	-3.20982	0.0865599
AT4TE18765	Transposable_element	21.1764	-2.99677	0.0865599
AT4G36515	protein_coding	109.145	-2.27922	0.0873127
AT5G13010	protein_coding	577.273	-1.66699	0.089321
AT5G17470	protein_coding	12.1052	4.38839	0.0894056
AT3TE50875	Transposable_element	5.83892	-4.90595	0.0911518
AT1G20880	protein_coding	108.86	-2.13124	0.0917344
AT5G44569	other_rna	8.05086	-4.56022	0.0934301
AT3TE44000	Transposable_element	39.3094	-4.68937	0.09406
AT4TE20945	Transposable_element	20.5334	-3.11237	0.0950533
AT1G01320	protein_coding	2867.75	-1.5992	0.0951909
AT1TE50895	Transposable_element	23.008	-3.68279	0.0952061
AT2G35387	small_nucleolar_rna	37.2368	-3.56966	0.0952061
AT1G60740	protein_coding	357.974	-2.80355	0.0961201
AT3G14735	small_nuclear_rna	59.0882	-3.56796	0.0975105
AT1G13145	pseudogene	37.6975	-3.19692	0.0995099
AT5TE17350	Transposable_element	99.3135	-2.5205	0.100508
ATMG00360	pre_trna	100.31	-3.2768	0.100762
ATCG00030	pre_trna	6566.05	-2.13771	0.10084
AT3G10290	protein_coding	46.7066	3.33578	0.102043
ATMG01275	protein_coding	765.18	-3.05246	0.102572
AT1G56045	protein_coding	2876.16	-1.40199	0.10292
AT3G55020	protein_coding	423.345	-1.80439	0.104665
AT3TE71210	Transposable_element	104.682	-2.28996	0.105022
AT1G15405	other_rna	33169.8	-3.43632	0.105239
AT1TE78160	Transposable_element	63.1946	-4.01755	0.105369
AT5TE45005	Transposable_element	44.1777	-3.60645	0.105626
AT2G45760	protein_coding	20.8282	4.61012	0.105703
AT1G80810	protein_coding	144.32	-2.09344	0.105713
AT1G69252	other_rna	231.837	-1.87705	0.106776
AT1G22960	protein_coding	61.527	-3.40766	0.106988
AT1G62310	protein_coding	178.64	-3.25562	0.106988
ATMG01330	protein_coding	88.874	-4.05178	0.108829
AT5G12980	protein_coding	127.484	1.9136	0.110075
AT3G29390	protein_coding	227.08	-2.3513	0.110725
AT4TE09580	Transposable_element	61.9745	-3.38364	0.110725
AT5TE46490	Transposable_element	33.6043	-2.81529	0.110725
AT1G04760	protein_coding	49.2757	3.62472	0.111158
AT2G03850	protein_coding	298.143	2.12566	0.113646
AT4TE09085	Transposable_element	1658.89	-1.6011	0.114249
AT4G02485	protein_coding	35.2544	-3.72357	0.115623
AT5G44750	protein_coding	211.613	-2.30157	0.115623
ATMG00980	protein_coding	434.326	-2.09115	0.115623
AT1G05950	protein_coding	82.9115	-2.65491	0.115921
AT1TE58700	Transposable_element	25.3333	-4.32598	0.116089
AT1TE42225	Transposable_element	821.589	-1.98634	0.119216
AT4G16240	protein_coding	664.117	-1.56002	0.119216
AT2G45220	protein_coding	182.85	3.55379	0.119377
AT1TE28510	Transposable_element	36.6454	-2.6497	0.120088
AT5TE41975	Transposable_element	338.991	-2.14608	0.120723
AT2G35010	protein_coding	328.189	1.86748	0.120908
AT5G02502	protein_coding	748.615	-1.6054	0.122848
AT3G17360	protein_coding	265.681	-1.64407	0.123196
AT4G19380	protein_coding	110.651	-2.04488	0.123196
AT5TE41980	Transposable_element	338.097	-2.1391	0.12419
AT3G04450	protein_coding	30.3734	-4.42078	0.124824
AT3G28923	pseudogene	10.0705	-4.46557	0.125892
AT2TE23705	Transposable_element	1286.48	-1.81356	0.125901
AT3G29060	protein_coding	30.038	-4.15416	0.125901
AT3G53235	protein_coding	8.14073	4.39356	0.126016
AT2G38940	protein_coding	46.0428	3.85858	0.126816
AT2G20210	protein_coding	35.0214	-3.36531	0.126838
ATMG00410	protein_coding	5359.6	-1.974	0.126838
AT1G68790	protein_coding	358.115	-1.73005	0.127548
AT2G21727	protein_coding	56.5467	4.10427	0.129355
AT3G57300	protein_coding	620.634	-1.73663	0.130043
AT5G39220	protein_coding	156.338	2.09893	0.130437
AT2TE10260	Transposable_element	29.0908	-2.66545	0.13147
AT2TE10985	Transposable_element	80.5778	-2.04835	0.131549
AT4TE12175	Transposable_element	13.4568	-4.26484	0.132319
AT3G41979	ribosomal_rna	2030.6	-3.60061	0.132443
AT3TE61640	Transposable_element	12.8548	-4.14773	0.132443
AT4TE09055	Transposable_element	144.109	-2.02639	0.132443
AT1TE43880	Transposable_element	56.251	-2.59629	0.13355
AT1TE44630	Transposable_element	1016.79	-2.71771	0.13355
AT2G07733	pseudogene	1765.46	-2.51942	0.13355
ATCG01020	protein_coding	2774.27	-2.24447	0.134134
AT1G77030	protein_coding	206.308	-1.8235	0.135778
AT3TE62735	Transposable_element	30.4987	-3.62189	0.135778
ATCG00970	ribosomal_rna	176.09	-2.68935	0.135778
AT5TE42975	Transposable_element	24.0944	-4.61948	0.135891
ATCG01240	protein_coding	10616.6	-1.65865	0.137045
ATMG00960	protein_coding	257.427	-3.67746	0.137595
AT1G73310	protein_coding	28.7451	-3.41223	0.138534
AT5G47260	protein_coding	10.1401	-4.58563	0.138587
AT4G28652	other_rna	33.6643	-3.77316	0.140484
AT4G16900	protein_coding	108.521	-2.0201	0.141458
AT2TE22550	Transposable_element	14.7991	-3.51606	0.142718
AT1G52970	protein_coding	70.6927	4.16347	0.143897
AT2G29260	protein_coding	18.2647	3.73906	0.145136
AT3G05725	protein_coding	79.9432	-3.42274	0.145829
AT4G02510	protein_coding	1885.64	-1.62509	0.145829
ATCG00350	protein_coding	42895.2	-2.38235	0.145829
AT5TE39640	Transposable_element	12.9877	-3.78885	0.146214
AT3G13857	protein_coding	64.2157	-3.27492	0.146963
AT5G51440	protein_coding	221.887	3.81969	0.146963
AT1TE47570	Transposable_element	67.9758	-2.65442	0.147375
AT2G07761	pre_trna	59.9599	-2.87905	0.147375
ATMG00340	pre_trna	59.9599	-2.87905	0.147375
AT5G48950	protein_coding	16.7244	4.097	0.147393
AT2G44050	protein_coding	249.514	1.80176	0.148395
AT5G26270	protein_coding	4668.92	-1.31915	0.148623
AT4TE13930	Transposable_element	228.405	-3.08882	0.14924
AT2G37310	protein_coding	30.6077	-3.92262	0.150168
AT5G39160	protein_coding	93.4269	3.90495	0.150168
AT1TE28330	Transposable_element	33.246	-2.6289	0.151846
AT4TE15950	Transposable_element	68.1699	-2.44917	0.151846
AT1G36150	protein_coding	89.3317	2.47908	0.151941
AT2TE38900	Transposable_element	120.227	-3.32134	0.154793
AT4G25810	protein_coding	47.3395	3.92383	0.154953
AT3G51075	other_rna	20.7679	-4.29848	0.155537
AT5G24350	protein_coding	456.645	-2.37244	0.155774
AT1G20840	protein_coding	288.747	-2.25697	0.15672
AT2G27730	protein_coding	2122.92	1.51879	0.15672
AT3G23450	protein_coding	1792.68	-1.64247	0.156948
AT3G61100	protein_coding	88.0507	-1.97884	0.15784
AT1G34315	protein_coding	15.2252	-4.00815	0.158585
AT1G64030	protein_coding	20.9512	3.22252	0.15937
AT2G07681	protein_coding	652.155	-2.12125	0.160019
AT4G00060	protein_coding	221.926	-1.75201	0.161017
AT1G58120	protein_coding	319.044	-2.36341	0.162348
AT1G58122	protein_coding	319.044	-2.36341	0.162348
AT5G23110	protein_coding	584.458	-2.29011	0.162678
AT1TE40360	Transposable_element	73.3832	-4.00744	0.163295
AT3TE61525	Transposable_element	748.271	-1.99235	0.163755
AT3G02160	protein_coding	37.531	3.43927	0.165482
AT3G25620	protein_coding	122.369	2.26707	0.166368
AT1G49320	protein_coding	28.3001	2.65018	0.168442
AT2G07599	protein_coding	306.932	-2.61295	0.169645
AT3TE54335	Transposable_element	50.8933	-3.14483	0.169645
AT5G36228	protein_coding	14.3424	-3.48666	0.169645
AT2G33435	protein_coding	236.445	-1.72299	0.169819
ATCG00590	protein_coding	389.143	-2.524	0.171927
AT2G07732	protein_coding	788.309	-3.65169	0.172179
ATMG00513	protein_coding	2986.48	-3.00696	0.174071
AT4TE15750	Transposable_element	64.5542	-2.23428	0.175003
ATCG01160	ribosomal_rna	184.104	-2.65802	0.175003
AT3TE50055	Transposable_element	9.79878	-4.04025	0.175709
AT2G45920	protein_coding	128.961	-2.3624	0.177836
AT1TE48665	Transposable_element	10.1855	-3.84937	0.17905
AT2G29960	protein_coding	793.424	1.62921	0.180104
AT2G01020	ribosomal_rna	1944.03	-3.56576	0.181036
AT2G43141	small_nucleolar_rna	10.4109	-4.3301	0.181036
AT4TE04415	Transposable_element	207.898	-1.79649	0.181722
AT5G58570	protein_coding	58.5139	-2.68913	0.18277
AT4TE10335	Transposable_element	78.4949	-2.1649	0.18296
AT2G07741	protein_coding	4930.27	-1.93085	0.183111
AT1G67830	protein_coding	346.638	1.5615	0.184868
AT1TE50345	Transposable_element	43.3192	-2.61659	0.184868
AT1TE50800	Transposable_element	43.3192	-2.61659	0.184868
AT4G26795	other_rna	26.5218	-3.00683	0.184868
ATCG00100	pre_trna	2744.59	-3.64	0.184992
ATMG00480	protein_coding	5806.93	-2.34165	0.185258
AT4G03295	small_nucleolar_rna	18.6488	-3.55616	0.185652
AT1G53542	protein_coding	141.36	-2.17678	0.18612
AT1G61566	protein_coding	930.784	-2.14406	0.18612
AT3G17250	protein_coding	58.4507	3.37129	0.18612
AT5G28320	protein_coding	174.304	-2.30405	0.18612
AT5TE44735	Transposable_element	104.446	-2.22443	0.18612
ATCG01080	protein_coding	1367.38	-3.83902	0.18612
AT4TE21115	Transposable_element	112.421	-2.83133	0.18912
AT3G26860	protein_coding	234.229	3.09647	0.191798
AT1G73250	protein_coding	74.3897	2.76829	0.196761
AT4G16770	protein_coding	74.7941	2.41659	0.197027
AT1G58420	protein_coding	51.9235	2.82571	0.198088
AT1G06260	protein_coding	488.767	1.92498	0.198104
AT4G05000	protein_coding	152.875	1.74843	0.199741
AT5TE43905	Transposable_element	33.8395	-2.70678	0.201851
AT1G76820	protein_coding	65.6955	-2.41266	0.201937
AT5G58900	protein_coding	32.9216	-2.63113	0.20196
AT2G27150	protein_coding	128.873	-2.88827	0.2022
AT2G36325	protein_coding	29.0838	3.88943	0.202255
AT5TE42360	Transposable_element	36.8668	-3.4709	0.203132
AT5TE42365	Transposable_element	36.8378	-3.47088	0.203132
AT1TE47540	Transposable_element	114.589	-2.3717	0.206516
AT3TE50165	Transposable_element	106.25	-2.32618	0.206516
ATCG00980	pre_trna	154.889	-3.75993	0.206516
ATCG01150	pre_trna	155.147	-3.75961	0.206516
AT4TE13920	Transposable_element	176.776	-3.8866	0.206654
AT5G12350	protein_coding	584.276	-1.47831	0.207154
AT5TE37800	Transposable_element	88.0043	-2.60231	0.207169
AT4G12917	other_rna	47.3047	-2.44997	0.208932
AT5G67520	protein_coding	48.5155	2.72135	0.209654
AT3TE61075	Transposable_element	48.8415	-2.51127	0.210232
AT1G07890	protein_coding	20991.4	1.43466	0.211382
AT4TE09075	Transposable_element	8.69833	-3.80315	0.211382
AT1TE47550	Transposable_element	85.5339	-2.82967	0.213184
AT2G47770	protein_coding	81.9962	2.63064	0.214074
AT4G02900	protein_coding	78.0654	-2.21735	0.214074
AT4TE17115	Transposable_element	214.48	-2.16877	0.217188
AT3G27650	protein_coding	13.383	3.8613	0.218437
AT5TE38615	Transposable_element	50.2398	-2.64441	0.218437
AT4G23880	protein_coding	65.4978	2.37616	0.221302
AT5G14090	protein_coding	17.9881	3.92269	0.221933
AT1G78780	protein_coding	62.8163	2.88755	0.224638
AT1G26940	protein_coding	100.114	2.08646	0.225571
AT3G18960	protein_coding	150.135	1.73035	0.226202
AT3G27865	small_nucleolar_rna	57.7853	-3.1949	0.226458
AT1G26208	other_rna	62.1526	-3.01235	0.229627
AT3G47570	protein_coding	23.8115	3.93727	0.234342
AT2TE16820	Transposable_element	115.738	-2.28931	0.235042
AT1G34640	protein_coding	330.827	1.72045	0.235152
AT1G69580	protein_coding	70.1388	2.61365	0.235554
AT4G28080	protein_coding	1402.94	-1.62751	0.235554
AT5G14960	protein_coding	27.1273	3.46791	0.235554
AT5G41740	protein_coding	68.4489	-3.44286	0.235554
AT5G04000	protein_coding	22.7832	3.06802	0.236499
AT2G04270	protein_coding	131.834	-2.43909	0.236918
AT2G07820	protein_coding	23.7897	3.13258	0.236918
AT5TE33315	Transposable_element	94.9531	-2.00619	0.236948
AT2TE12470	Transposable_element	44.843	-2.9586	0.237304
AT1TE42210	Transposable_element	385.311	-1.84677	0.237897
AT1G07340	protein_coding	105.651	2.54907	0.242579
AT4G09650	protein_coding	2569.4	1.95794	0.245085
AT1G64300	protein_coding	63.9071	3.40438	0.247035
AT1G03506	small_nucleolar_rna	19.5225	-2.91273	0.247232
AT1G34350	protein_coding	193.364	1.74608	0.247363
AT3TE54575	Transposable_element	48.75	-2.48474	0.247363
ATMG00640	protein_coding	2052.7	-2.90123	0.247363
AT4G20780	protein_coding	81.5299	2.52358	0.248376
AT2G44040	protein_coding	264.722	1.5264	0.250134
AT3TE55480	Transposable_element	14.179	-4.07573	0.250134
AT5G47435	protein_coding	243.148	-1.84913	0.251327
AT5TE40515	Transposable_element	103.964	-3.8635	0.252998
AT4TE09570	Transposable_element	547.879	-2.4503	0.25605
AT2G35384	small_nucleolar_rna	11.6487	-4.16917	0.258927
AT4G18800	protein_coding	413.998	1.53864	0.265543
AT3G46940	protein_coding	1596.62	1.45235	0.267002
AT4G11840	protein_coding	153.639	-2.3543	0.26823
ATMG01090	protein_coding	585.027	-2.35785	0.274394
AT2G04378	protein_coding	1311.44	-1.45779	0.275561
AT2G07664	pseudogene	35.6554	-2.85832	0.277072
AT3G12830	protein_coding	119.851	1.91294	0.277969
AT3TE61050	Transposable_element	19.2337	-4.10355	0.278402
AT3G44430	protein_coding	234.067	-1.72466	0.279352
AT2TE46170	Transposable_element	16.2846	-3.91203	0.285637
AT3G02260	protein_coding	2328.53	-1.4909	0.285637
AT3TE53130	Transposable_element	300.773	-2.21413	0.285852
AT5G16540	protein_coding	180.039	-2.22845	0.285852
AT1G01448	other_rna	38.8581	-3.62574	0.286419
AT4TE25100	Transposable_element	57.0528	-2.99654	0.288253
AT1TE08710	Transposable_element	68.4789	-2.37765	0.28826
AT4G32570	protein_coding	259.029	-1.68706	0.28826
AT3G49510	protein_coding	15.4508	3.82302	0.290257
AT2G45540	protein_coding	1346.69	-1.42491	0.292444
AT3TE47985	Transposable_element	5.32017	-4.61859	0.292778
AT4G22758	protein_coding	25.8709	3.76064	0.292778
AT3TE54985	Transposable_element	64.8035	-2.96051	0.2958
AT3TE57565	Transposable_element	15.7024	-3.95079	0.296084
AT1G10760	protein_coding	1551.38	-1.64849	0.297867
AT5G45475	other_rna	34.0569	-3.61041	0.297867
AT3TE57360	Transposable_element	59.632	-2.25303	0.298629
AT2TE21105	Transposable_element	210.903	-1.69596	0.299876
AT3G53980	protein_coding	616.722	1.73295	0.302815
AT1G43980	protein_coding	20.4158	-4.12048	0.303243
AT2G32350	protein_coding	10.6248	4.0677	0.303243
AT5G18245	other_rna	47.2723	-2.9846	0.303534
AT4TE42950	Transposable_element	71.8047	-2.02568	0.305631
AT5G14565	mirna	25.4824	-3.24125	0.305631
AT3G59320	protein_coding	63.1569	-2.70555	0.307607
AT5G36930	protein_coding	107.906	-2.83019	0.311651
AT1G67980	protein_coding	16.2642	4.11561	0.312968
AT1G49310	protein_coding	4.92268	3.92357	0.313729
AT2TE16420	Transposable_element	52.7905	-3.18679	0.313729
AT5TE46350	Transposable_element	25.1082	-3.05897	0.313729
AT3TE56035	Transposable_element	14.1959	-3.97056	0.314408
AT1G20720	protein_coding	59.9119	-3.80017	0.314471
AT1G74200	protein_coding	14.4406	-3.77299	0.316626
AT1G76720	protein_coding	42.0347	-3.07301	0.316685
AT1G76750	protein_coding	36.7153	3.80224	0.316685
AT3G62220	protein_coding	87.6537	2.09251	0.316685
AT1TE43040	Transposable_element	121.506	-3.73295	0.31717
ATCG01170	ribosomal_rna	233.823	-2.67019	0.318282
AT5G37780	protein_coding	2988.17	1.45129	0.318339
AT4TE09505	Transposable_element	9.42373	-4.23505	0.320025
AT4G32070	protein_coding	185.575	-1.77723	0.320692
AT4G35640	protein_coding	44.9154	-2.84603	0.322358
AT1G76170	protein_coding	44.9716	-3.02865	0.323047
AT2TE23865	Transposable_element	14.9765	-3.13135	0.323505
AT5G50940	protein_coding	18.065	-3.85281	0.323505
AT2TE17305	Transposable_element	36.5829	-3.87672	0.326219
AT1G04425	other_rna	84.2144	-2.82858	0.32724
AT2TE20450	Transposable_element	18.9703	-3.83001	0.328899
AT5G28050	protein_coding	566.34	1.50579	0.329725
AT3G56160	protein_coding	309.609	-1.81478	0.332162
AT1G66345	protein_coding	76.8504	-1.9507	0.33279
AT2G17440	protein_coding	81.6147	-2.31707	0.333517
AT1G34820	protein_coding	16.0258	-4.32916	0.333749
AT1G73550	protein_coding	7.97023	3.91086	0.333749
AT1G34825	protein_coding	15.9662	-4.3365	0.336081
AT1G05790	protein_coding	179.38	-1.77631	0.336115
AT3TE56635	Transposable_element	6.60422	-4.4444	0.336115
AT4TE15940	Transposable_element	59.9873	-2.31734	0.337815
AT1TE52205	Transposable_element	1116.55	-1.98874	0.338257
AT3G30247	protein_coding	29.1755	3.79929	0.338296
AT1G26235	other_rna	17.4795	-3.72559	0.340938
AT3G54720	protein_coding	148.266	-1.70028	0.340938
AT1G09500	protein_coding	118.71	3.56249	0.343563
AT1G78915	protein_coding	112.595	1.93461	0.344133
AT5G57660	protein_coding	275.653	1.88428	0.347001
AT1G66040	protein_coding	21.8828	-3.25245	0.349519
AT4TE18715	Transposable_element	75.7579	-2.37693	0.350203
AT5G62190	protein_coding	1781.5	-1.33056	0.350203
AT2G07699	pseudogene	3646.6	-1.85102	0.351526
AT2G38490	protein_coding	14.3442	3.76049	0.354941
AT1G77300	protein_coding	647.59	-1.60229	0.355301
AT3TE79470	Transposable_element	15.2312	-3.68813	0.35874
AT4G32620	protein_coding	433.379	-1.93867	0.360933
AT4G00850	protein_coding	71.3391	2.207	0.361576
AT4G24890	protein_coding	33.632	3.05084	0.362572
AT4G33740	protein_coding	124.675	-1.97368	0.362572
AT1G12750	protein_coding	229.112	-1.68171	0.362817
AT1TE46305	Transposable_element	77.6154	-2.12897	0.363811
AT2G21237	protein_coding	21.5728	3.46985	0.365487
AT3TE62215	Transposable_element	402.34	-1.7823	0.36598
AT3TE50670	Transposable_element	432.635	-2.01415	0.368159
ATCG00960	ribosomal_rna	228.71	-2.62795	0.368212
AT5TE38025	Transposable_element	40.7616	-3.12628	0.368225
AT2G30945	other_rna	34.0516	-2.38196	0.36928
AT2G07768	protein_coding	190.135	-3.35727	0.371275
AT5G12280	protein_coding	21.5237	-3.78681	0.372429
AT5TE68140	Transposable_element	101.397	-1.91671	0.372429
AT3G23460	protein_coding	26.1091	-3.53475	0.372887
ATMG01320	protein_coding	2026.29	-2.66083	0.373146
AT3TE54760	Transposable_element	23.4863	-3.36925	0.376119
AT3TE53100	Transposable_element	29.1408	-3.84074	0.379064
AT2G20723	small_nucleolar_rna	24.1559	-3.71003	0.381349
ATCG00250	pre_trna	183.672	-3.08344	0.384731
AT4G17085	protein_coding	227.387	-1.60014	0.388289
AT1G02300	protein_coding	131.813	-2.16781	0.389443
AT1G59860	protein_coding	7595.8	2.31689	0.389651
AT1G80070	protein_coding	3496.32	-1.292	0.389651
AT1TE55865	Transposable_element	4.94182	-4.16359	0.390469
AT1G63060	protein_coding	156.361	2.40395	0.393815
AT3G49180	protein_coding	88.9933	2.09539	0.397875
AT1G09610	protein_coding	40.0595	3.2275	0.398889
AT1TE19130	Transposable_element	59.1526	-2.26455	0.399187
AT2G39681	other_rna	149.978	-1.70492	0.399187
AT3G47540	protein_coding	71.3925	2.17415	0.403148
AT2TE41175	Transposable_element	162.783	-1.71283	0.403198
AT5G04290	protein_coding	160.268	-1.74867	0.403596
AT3G48830	protein_coding	32.2924	-3.63724	0.405497
AT3TE61530	Transposable_element	132.732	-2.09143	0.407287
AT1TE47220	Transposable_element	4.79214	-4.31732	0.407558
AT2TE16880	Transposable_element	6.24501	-3.8668	0.408814
AT3TE40425	Transposable_element	8.02929	-3.98288	0.410919
AT3G61198	other_rna	113.477	-3.14213	0.411457
AT2TE20110	Transposable_element	5.42403	-4.16947	0.413195
AT3G28080	protein_coding	76.4672	-2.35104	0.413602
AT2TE08225	Transposable_element	64.4923	-2.42461	0.414232
AT2TE12040	Transposable_element	9.39363	-4.32731	0.414232
AT3G60950	protein_coding	140.04	-2.38754	0.414232
AT1TE86740	Transposable_element	109.501	-2.50676	0.414968
AT2G14282	protein_coding	44.8546	2.40892	0.414968
AT2G29300	protein_coding	28.2189	-2.8396	0.41547
AT4G19830	protein_coding	67.8273	-2.39626	0.41547
AT5G01510	protein_coding	67.0901	-2.45251	0.41547
AT5G12236	protein_coding	3.86293	3.9366	0.41662
AT3G53240	protein_coding	93.5925	-2.09232	0.416666
AT2G32060	protein_coding	2686.05	1.45543	0.424401
AT3TE60155	Transposable_element	10.4114	-4.03164	0.424401
AT2G44430	protein_coding	101.121	-1.85264	0.426932
AT1G28550	protein_coding	57.3975	3.18149	0.427378
AT4G16340	protein_coding	895.864	-1.43521	0.427378
AT3G47680	protein_coding	143.817	-2.44474	0.429772
AT2G40710	protein_coding	12.3229	-3.44343	0.431148
AT2G07751	protein_coding	895.356	-1.5934	0.433857
AT1TE51810	Transposable_element	8.22005	-4.0243	0.434031
AT2TE26680	Transposable_element	111.301	-2.29228	0.434031
AT2G25260	protein_coding	13.864	-3.50536	0.435554
AT5G18910	protein_coding	93.1872	-3.09667	0.435554
AT1G29560	protein_coding	23.7962	-3.58068	0.435957
AT2TE21745	Transposable_element	25.4003	-2.53318	0.435957
AT5G40020	protein_coding	12.8187	3.71518	0.435957
AT5TE46855	Transposable_element	102.935	-2.1244	0.438255
ATCG00940	pre_trna	4589.43	-2.05465	0.439578
AT1G70620	protein_coding	435.484	-1.48738	0.440856
AT1TE47105	Transposable_element	123.373	-2.83342	0.441255
AT1G23050	protein_coding	61.262	2.38359	0.442275
AT1TE51190	Transposable_element	11.9514	-3.0256	0.445227
AT1G54280	protein_coding	41.4638	-3.46078	0.445356
ATCG01070	protein_coding	935.933	-2.52465	0.446087
AT3TE57685	Transposable_element	30.8246	-2.64542	0.44705
AT1G08840	protein_coding	139.901	-2.14828	0.447084
AT2G07675	protein_coding	418.875	-1.86578	0.449383
AT4TE03410	Transposable_element	113.92	-2.22986	0.4498
AT5G35970	protein_coding	338.187	-1.57255	0.4498
AT2TE20330	Transposable_element	60.4783	-3.23998	0.449862
AT3G27340	protein_coding	449.294	-1.38773	0.449862
AT2G21840	protein_coding	8.74914	-3.36714	0.454556
AT3TE61420	Transposable_element	12.6858	-4.07434	0.454556
AT2G34930	protein_coding	37.4909	3.49284	0.456213
AT3G57980	protein_coding	106.513	-2.93576	0.457555
AT5G13820	protein_coding	89.988	2.54842	0.457555
AT2G45630	protein_coding	130.096	1.64394	0.458606
AT5TE38345	Transposable_element	7.15535	-3.8931	0.459904
AT3G21770	protein_coding	111.424	1.86531	0.465661
AT2TE11765	Transposable_element	15.0801	-3.17853	0.468568
AT5G02140	protein_coding	61.4293	2.11314	0.468568
AT5G07720	protein_coding	32.5545	3.38428	0.468611
AT1G57777	protein_coding	55.3048	3.58539	0.469635
AT4G19220	protein_coding	16.5702	-3.04848	0.469635
AT1G68110	protein_coding	113.716	-2.99163	0.471792
AT3G53990	protein_coding	3978.3	1.36894	0.471792
AT1G12610	protein_coding	54.0904	3.77848	0.472591
AT2G23990	protein_coding	41.9712	3.59491	0.473704
AT2G30060	protein_coding	1217.77	1.36427	0.473704
AT4G15910	protein_coding	737.808	-1.54253	0.473704
AT4G19100	protein_coding	406.325	1.80721	0.473704
AT4G30950	protein_coding	1263.87	-1.3799	0.473704
AT4TE40665	Transposable_element	19.8914	3.49628	0.473704
AT4TE19475	Transposable_element	10.7633	-3.83805	0.473854
AT5TE42670	Transposable_element	34.4528	-2.41283	0.473962
AT4G34138	protein_coding	143.195	-1.89258	0.474124
AT1G17020	protein_coding	79.827	2.46961	0.474704
AT1G68875	protein_coding	1217.87	1.63914	0.474704
AT2G07707	protein_coding	5621.71	-2.13052	0.474704
AT2G07777	protein_coding	425.136	-2.19529	0.474704
AT2TE20035	Transposable_element	101.001	-2.09907	0.474704
AT4G09462	protein_coding	16.4809	3.63652	0.474704
AT5G15700	protein_coding	123.358	-1.81005	0.474704
AT5G20670	protein_coding	110.132	1.89442	0.474704
AT5G60660	protein_coding	79.7998	2.49107	0.474704
AT5TE38020	Transposable_element	21.2545	-3.15494	0.474704
AT5TE41135	Transposable_element	72.4674	-2.26763	0.476975
AT1G68862	protein_coding	34.0133	-2.97386	0.481828
AT2G22090	protein_coding	269.055	1.57207	0.481828
AT2G42240	protein_coding	116.283	1.84055	0.481828
AT5G42110	protein_coding	236.943	-1.56324	0.482071
AT3G30383	protein_coding	64.8905	3.65931	0.482788
AT1G61860	protein_coding	81.0412	-3.03523	0.485343
AT1G30590	protein_coding	240.851	-1.76531	0.486846
AT2TE10575	Transposable_element	90.7133	-1.81263	0.486846
AT4TE13565	Transposable_element	17.4824	3.66934	0.486846
AT4TE16910	Transposable_element	410.086	-1.95636	0.486846
AT5G60500	protein_coding	81.7906	2.20896	0.486846
AT3G27025	protein_coding	25.3833	3.53847	0.487393
ATCG00160	protein_coding	2074.5	-1.54776	0.489176
AT3G29797	protein_coding	33.0118	3.56302	0.489187
AT4TE16750	Transposable_element	12.1982	-3.81879	0.489187
AT4G04110	protein_coding	12.1592	-3.80736	0.493826
AT1G08860	protein_coding	21.9183	3.41965	0.504191
AT4G26530	protein_coding	1101.76	-1.40099	0.504227
AT3G18295	protein_coding	115.121	1.79233	0.505237
AT5G49960	protein_coding	32.1013	-3.38781	0.50537
AT5TE46760	Transposable_element	28.0122	-3.27305	0.506397
AT1G23620	pseudogene	41.6255	-3.58526	0.506555
AT4TE16390	Transposable_element	245.265	-3.67462	0.506989
AT1G17300	protein_coding	21.2029	3.29557	0.510553
AT1TE30550	Transposable_element	15.8537	-2.73832	0.511197
AT4TE08980	Transposable_element	26.9302	-2.86324	0.511651
AT1G54260	protein_coding	74.4976	-3.18462	0.517705
AT2G14110	protein_coding	76.0752	2.35064	0.525537
AT3G07280	pseudogene	146.715	-1.77117	0.525537
AT5TE41270	Transposable_element	68.3815	-2.45711	0.526972
ATMG00190	pre_trna	45.2061	-3.02738	0.527136
AT3G24065	protein_coding	10.4233	3.7013	0.533118
AT5G52471	small_nucleolar_rna	17.6265	-3.73021	0.534592
AT5TE15640	Transposable_element	20.4673	-3.60675	0.535522
AT1TE58495	Transposable_element	7.90118	-4.04675	0.536304
AT3G61010	protein_coding	143.111	-2.29073	0.536481
AT4G20690	protein_coding	19.3331	-3.36848	0.53715
AT1G16800	protein_coding	100.074	-2.88226	0.537399
AT1G26530	protein_coding	13.792	-3.87953	0.538458
AT5G44180	protein_coding	439.276	-1.47887	0.540015
AT1G67530	protein_coding	93.029	-2.5214	0.540205
AT1G70540	protein_coding	53.1884	2.82057	0.540205
AT3G01270	protein_coding	1308.34	-2.16559	0.54241
AT1TE53785	Transposable_element	7.01412	-3.90113	0.542411
AT1G19396	protein_coding	83.9376	-1.85036	0.544076
AT5TE39210	Transposable_element	35.3956	-2.46285	0.544665
AT5TE39940	Transposable_element	3.93814	4.18219	0.555151
AT1G28360	protein_coding	25.596	2.68841	0.555163
AT1G34805	protein_coding	11.6429	-4.01799	0.555163
AT1G48530	protein_coding	7.11312	3.64737	0.555163
AT4TE14240	Transposable_element	20.4244	-3.75548	0.555187
AT1G77920	protein_coding	53.4321	2.90441	0.555473
AT4G25580	protein_coding	4.22487	-4.03245	0.555473
ATMG00830	protein_coding	504.905	-2.24402	0.555885
AT5G23360	protein_coding	46.3771	2.49695	0.556185
AT1G27020	protein_coding	23.5416	2.97475	0.558108
AT3G59710	protein_coding	16.693	-2.95477	0.558391
AT5G09370	protein_coding	145.689	2.70666	0.558391
AT3G21320	protein_coding	110.408	-2.34464	0.560805
AT5G02680	protein_coding	59.5081	-2.63249	0.560831
AT4G01140	protein_coding	12.0387	3.59202	0.563162
AT1G09450	protein_coding	98.7933	-1.89925	0.563498
AT3G14560	protein_coding	884.671	1.54981	0.563876
AT1G32385	small_nucleolar_rna	17.4353	-2.7379	0.567213
AT1G79410	protein_coding	41.1205	2.50964	0.568675
AT2TE06040	Transposable_element	38.2732	-2.19024	0.570406
AT2TE20940	Transposable_element	855.791	-1.56222	0.572155
AT1G62190	protein_coding	12.8213	3.71204	0.572386
AT4G08025	protein_coding	60.2357	3.40761	0.57245
ATCG00400	pre_trna	6618.62	-2.90498	0.575241
ATCG00820	protein_coding	4688.42	-1.50267	0.577922
AT5G50370	protein_coding	285.687	1.56189	0.580001
AT5G45840	protein_coding	67.3927	-2.78433	0.580364
AT2TE31290	Transposable_element	16.3484	-3.98878	0.582453
AT3G60955	pseudogene	38.0512	-2.29911	0.582453
AT5TE41835	Transposable_element	11.1408	-3.73433	0.582453
AT1TE47440	Transposable_element	4.47528	-4.08755	0.584717
AT4TE18705	Transposable_element	202.94	-2.53756	0.584717
AT2G35650	protein_coding	206.444	-1.78493	0.585203
AT3TE44480	Transposable_element	7.35333	3.87043	0.585203
AT2G46535	protein_coding	79.9745	2.02764	0.58757
AT1G74350	protein_coding	29.2389	-3.19297	0.589163
AT2G35742	small_nucleolar_rna	3.62068	-3.84587	0.589163
AT5G19473	protein_coding	59.337	-3.17653	0.589163
AT2G29950	protein_coding	17.2454	-3.34733	0.589599
AT4TE08245	Transposable_element	6.77528	-3.72204	0.590944
AT5TE39060	Transposable_element	16.3596	-3.94198	0.592839
ATMG01020	protein_coding	151.669	-3.18452	0.596841
AT5G48820	protein_coding	33.5369	2.95585	0.598166
AT4G23496	protein_coding	43.6484	-2.43429	0.599249
AT3G63052	protein_coding	622.693	-3.14397	0.601091
AT5TE43915	Transposable_element	293.644	-2.30877	0.601091
AT1TE64830	Transposable_element	63.2223	-2.40332	0.602811
AT2TE26385	Transposable_element	18.866	-2.95189	0.602811
AT3G28030	protein_coding	151.925	-1.93046	0.602811
AT5G16550	protein_coding	396.564	1.46715	0.603689
AT5TE62035	Transposable_element	23.3635	-2.77275	0.603689
AT2G24520	protein_coding	70.5226	-2.26625	0.605505
AT4TE83080	Transposable_element	13.8017	-3.07004	0.607096
AT1G05830	protein_coding	277.206	-1.95992	0.610127
AT1G64570	protein_coding	163.81	-2.34125	0.610127
AT4G05220	protein_coding	11.6862	3.51883	0.610127
AT3G51640	protein_coding	433.71	-1.52238	0.611509
AT4TE13950	Transposable_element	395.846	-2.26915	0.611509
AT5G09860	protein_coding	223.469	-1.50653	0.611509
ATMG00630	protein_coding	20.3052	-3.53815	0.611509
AT3G06450	protein_coding	346.824	-1.4607	0.612024
AT1G08770	protein_coding	214.102	1.49323	0.614406
AT3G06500	protein_coding	343.953	-1.81501	0.614406
AT4TE19920	Transposable_element	102.098	-2.40836	0.614406
ATCG01250	protein_coding	4808.96	-2.50654	0.614406
AT3G24840	protein_coding	94.896	3.08477	0.6184
AT5G03760	protein_coding	551.308	-1.55247	0.6184
AT2G20840	protein_coding	127.417	2.15962	0.61873
AT3G13400	protein_coding	1853.94	-1.85932	0.61983
AT2TE20005	Transposable_element	5.00482	-3.71015	0.620743
AT2TE55610	Transposable_element	60.5285	2.97301	0.621368
ATMG00990	protein_coding	907.811	-1.60927	0.623831
AT2G23540	protein_coding	12.2186	3.48662	0.624702
AT1TE42350	Transposable_element	26.98	-2.68457	0.62569
AT2G36180	protein_coding	10.0428	3.68963	0.625902
ATCG00890	protein_coding	4820.19	-2.49994	0.625902
AT1G47470	protein_coding	33.9109	3.47515	0.629763
AT2G13128	pseudogene	8.21165	-3.65871	0.629763
AT2G32970	protein_coding	162.217	-1.77375	0.629763
AT5G48530	protein_coding	34.0617	-2.69554	0.629763
AT5G51620	protein_coding	125.327	-1.89918	0.629763
AT1G49150	protein_coding	16.5239	3.35831	0.631099
AT3G18845	pseudogene	6.13125	-3.60831	0.633828
AT1G22930	protein_coding	1124.11	-1.5371	0.634183
AT3G61030	protein_coding	85.6527	-3.45781	0.634183
AT2G37670	protein_coding	22.8768	3.25999	0.634632
AT1G75890	protein_coding	60.9767	2.39997	0.634692
AT2G25730	protein_coding	659.003	-1.57402	0.636059
AT3G10610	protein_coding	1339.51	1.27973	0.636059
AT3G44960	protein_coding	12.3496	-3.47573	0.636109
AT5G43403	other_rna	29.4429	-3.10237	0.636229
AT1G05820	protein_coding	38.3282	-3.39501	0.636505
ATMG00920	protein_coding	75.2877	-3.35476	0.640103
AT3G11720	protein_coding	65.2676	-2.60676	0.644043
AT5G23890	protein_coding	492.482	-1.54815	0.644043
AT5G27230	protein_coding	11.6498	-3.44468	0.644043
AT1G32280	protein_coding	5.91544	3.52737	0.644123
AT3G44300	protein_coding	235.965	2.36594	0.650506
AT5TE62030	Transposable_element	72.7218	-2.02958	0.650506
AT1G36922	protein_coding	9.40124	-3.32465	0.650979
AT2G40250	protein_coding	11.89	3.44346	0.650979
AT1TE45175	Transposable_element	133.434	-2.39528	0.654263
ATCG01190	pre_trna	4174.92	-2.06776	0.656221
AT3G62190	protein_coding	118.534	-1.98606	0.656727
AT5G22720	protein_coding	45.8253	-2.46352	0.656727
AT3G09430	protein_coding	20.8696	3.08561	0.660827
AT3G30120	pseudogene	14.8417	3.46858	0.660827
AT4G33600	protein_coding	20.6441	3.17493	0.660827
AT5G38150	protein_coding	119.866	-2.49213	0.660827
ATCG00320	pre_trna	20.2688	-3.53563	0.660827
AT1G07330	protein_coding	21.5135	-3.45327	0.664208
AT5G12000	protein_coding	175.382	-2.52665	0.664208
AT1G19373	small_nucleolar_rna	30.1348	-3.21908	0.665251
AT1G03790	protein_coding	13.7383	3.43249	0.670278
AT3G06900	small_nuclear_rna	450.387	-2.67677	0.676453
AT4TE14035	Transposable_element	395.98	-2.14862	0.677425
AT5G23370	protein_coding	18.4493	3.44932	0.677507
AT4G26480	protein_coding	240.493	-1.82147	0.678867
AT3G09680	protein_coding	52.2369	2.39238	0.679061
AT2G31141	protein_coding	9007.4	-2.32355	0.681202
AT4TE15555	Transposable_element	370.961	-2.38413	0.68412
AT1G01990	protein_coding	126.86	-1.56769	0.685741
AT2TE14330	Transposable_element	110.177	-3.4359	0.685741
AT3G17060	protein_coding	678.883	2.3409	0.686181
AT3G27200	protein_coding	1365.04	1.62158	0.686181
AT3TE52695	Transposable_element	3.97608	-3.694	0.687687
AT4G11010	protein_coding	1318.11	1.34051	0.687687
AT4G16800	protein_coding	129.574	1.89885	0.687687
AT4G32690	protein_coding	46.5433	2.35196	0.687687
AT5G37170	protein_coding	36.7045	-3.09206	0.687687
AT5G17890	protein_coding	243.588	-1.77374	0.68822
AT5G25780	protein_coding	664.637	-1.322	0.688424
AT4G29060	protein_coding	2910.66	-1.35971	0.689137
AT2G04560	protein_coding	21.2773	3.22666	0.690052
AT3G52905	protein_coding	77.2393	1.81837	0.690052
AT4G35190	protein_coding	135.22	1.80751	0.692241
AT1G62820	protein_coding	551.885	1.40819	0.693303
AT1G49660	protein_coding	242.138	1.60729	0.693966
AT5G40340	protein_coding	681.17	-1.55135	0.694909
AT4G30993	protein_coding	428.448	-1.49005	0.697177
AT5G18475	protein_coding	35.033	2.64988	0.701902
AT2G33420	protein_coding	197.48	-2.51039	0.701943
AT2TE16575	Transposable_element	345.797	-1.87672	0.701943
AT4G32700	protein_coding	154.297	-2.36785	0.701943
AT2G43720	protein_coding	34.5283	2.29011	0.703534
AT2TE40675	Transposable_element	5.89583	3.65283	0.703534
AT3G08730	protein_coding	407.019	-1.61406	0.703534
AT5TE44750	Transposable_element	15.2275	-2.90426	0.704891
AT4G36080	protein_coding	627.888	-1.78051	0.705
AT3G01690	protein_coding	429.59	-1.58539	0.705812
AT2G26570	protein_coding	214.93	-1.63041	0.706953
AT3G30380	protein_coding	94.8501	-2.26385	0.706953
AT1G17610	protein_coding	8.30784	-2.89745	0.710427
AT1G69210	protein_coding	30.4045	3.18561	0.710427
AT4TE20745	Transposable_element	565.752	-2.16219	0.710551
AT3TE53105	Transposable_element	4.76946	-3.74761	0.711314
AT4TE15005	Transposable_element	41.5548	-2.37227	0.713622
AT5G03170	protein_coding	548.288	1.46524	0.715481
AT4TE19470	Transposable_element	76.6525	-1.85681	0.71726
AT1G67140	protein_coding	546.584	-1.71203	0.720587
AT5G05365	protein_coding	21.7814	3.35346	0.721956
AT5TE00010	Transposable_element	42.315	-2.72916	0.723562
AT1TE95230	Transposable_element	45.3018	-3.33755	0.724103
AT1TE48850	Transposable_element	36.952	-2.26424	0.728519
AT3TE37690	Transposable_element	191.798	-2.01739	0.728519
ATCG00780	protein_coding	2457.61	-1.81141	0.730783
AT1G54030	protein_coding	500.243	1.64126	0.731697
AT3G58790	protein_coding	193.127	-1.77525	0.731697
AT5G61340	protein_coding	15.9954	3.25309	0.731697
AT1TE42490	Transposable_element	10.9816	3.44454	0.734757
AT1TE54760	Transposable_element	286.509	-1.98243	0.734757
AT3G06880	protein_coding	243.259	-1.82594	0.734757
AT2G40205	protein_coding	2833.62	-1.40775	0.736401
AT4G25470	protein_coding	62.9089	2.41637	0.738456
ATMG01170	protein_coding	3719.3	-1.66243	0.73932
AT4G38932	other_rna	238.103	-1.85459	0.741433
AT5G24880	protein_coding	29.8736	-3.30755	0.742371
AT1G22160	protein_coding	613.931	-1.49438	0.742935
AT1G66730	protein_coding	175.551	-1.90194	0.74513
AT1G72645	protein_coding	196.033	-1.73905	0.74513
AT1G07745	protein_coding	35.3283	-3.33585	0.748674
AT5G06300	protein_coding	7.62293	3.40278	0.751892
AT5TE42320	Transposable_element	18.7924	-3.57323	0.753797
AT2G03200	protein_coding	84.7374	2.19735	0.753865
AT3TE60555	Transposable_element	25.9622	-3.43919	0.753865
AT2G13960	protein_coding	25.3239	-2.32626	0.75539
AT2G36390	protein_coding	711.797	-1.4114	0.75539
AT1G26910	protein_coding	347.554	1.41683	0.759951
AT1G66410	protein_coding	5814.41	1.17307	0.759951
AT3G22360	protein_coding	15.5397	3.25431	0.760329
AT1G32250	protein_coding	73.6351	2.71993	0.760854
ATMG01040	protein_coding	22.0462	-3.33953	0.760854
AT1G58007	protein_coding	4.69203	-3.72473	0.761058
AT2TE45275	Transposable_element	8.78972	-3.45472	0.763083
AT1G72440	protein_coding	632.48	-1.62277	0.765511
AT1G21900	protein_coding	406.54	1.40721	0.767947
AT2G46450	protein_coding	154.265	-2.07366	0.767947
AT4G08035	other_rna	153.777	-1.6095	0.767947
AT1G05570	protein_coding	582.858	-1.52704	0.769107
AT3G47780	protein_coding	31.2777	3.29439	0.770246
AT5G27670	protein_coding	1412.05	1.24252	0.772246
AT3G13530	protein_coding	291.042	-1.57384	0.775031
AT3G18300	protein_coding	88.4768	1.77691	0.775031
AT1G23840	protein_coding	15.7131	3.52627	0.775661
AT3G44070	protein_coding	175.32	-1.54395	0.775661
AT4G28020	protein_coding	25.997	3.14237	0.775661
AT5G43150	protein_coding	240.022	-1.77346	0.775661
AT3G50100	protein_coding	54.6442	2.53558	0.78011
AT1G02110	protein_coding	214.077	-1.68917	0.781357
AT2TE22040	Transposable_element	2396.66	-1.354	0.781357
AT5G35680	protein_coding	3575.68	1.21578	0.781357
AT2TE19120	Transposable_element	33.8556	-2.5784	0.781442
AT2G38730	protein_coding	308.585	1.54473	0.781812
AT2G26610	protein_coding	11.883	-3.48052	0.781915
AT1TE44455	Transposable_element	293.523	-2.18966	0.782308
AT2G07758	pre_trna	74.6294	-2.47308	0.782308
AT2G41970	protein_coding	34.1475	-2.95088	0.782308
AT3TE67135	Transposable_element	3.88776	-3.80261	0.782308
AT5G08030	protein_coding	127.772	1.74633	0.782308
ATMG00250	pre_trna	75.1211	-2.4726	0.782308
AT3TE46010	Transposable_element	6.67162	-3.84454	0.784871
AT2TE09500	Transposable_element	14.4701	-3.77145	0.791839
AT2G45830	protein_coding	5.09044	-3.71287	0.792742
AT4G17140	protein_coding	1312.68	-1.69181	0.792742
AT3G22690	protein_coding	26.0679	3.17493	0.794908
AT3G10310	protein_coding	118.55	-3.15296	0.798023
AT3G22510	protein_coding	60.3098	-2.71648	0.799201
AT3G19210	protein_coding	46.3443	-2.294	0.800051
AT2G26490	protein_coding	76.8564	3.11312	0.801714
AT2TE20040	Transposable_element	98.6576	-2.10567	0.80237
AT4G11040	protein_coding	6.5701	-3.12471	0.803246
AT2TE16545	Transposable_element	10.8158	-3.60287	0.806387
AT4G32810	protein_coding	26.8943	-3.33025	0.807078
AT2G18280	protein_coding	360.28	-1.54101	0.808498
AT2G42395	protein_coding	25.4255	2.37801	0.808564
AT4G27595	protein_coding	231.608	-1.69508	0.808564
AT4G11211	protein_coding	373.216	-1.45665	0.809501
AT1G14687	protein_coding	29.2859	2.49981	0.811458
AT1G28306	protein_coding	29.9425	3.15132	0.811458
AT3G58193	small_nucleolar_rna	16.9744	-3.12627	0.811458
AT2TE16585	Transposable_element	112.81	-2.05721	0.811731
AT2TE20665	Transposable_element	8.16256	-3.72461	0.811838
AT2TE68680	Transposable_element	7.39753	-3.53533	0.818743
AT1G75850	protein_coding	155.477	-1.75503	0.819214
AT5G08050	protein_coding	1366.17	1.44637	0.819214
AT2G02240	protein_coding	7.57667	3.3406	0.821656
AT1TE52000	Transposable_element	5.42858	-3.5451	0.824905
AT5G60030	protein_coding	55.5168	-2.04447	0.827139
AT1G48200	protein_coding	88.2809	1.77645	0.82806
AT1G14880	protein_coding	97.1474	3.60683	0.829478
AT2TE16385	Transposable_element	37.2155	-1.93502	0.829478
AT5G42830	protein_coding	10.2049	2.88739	0.830009
AT2G14378	protein_coding	51.4674	3.21167	0.832273
AT4G00220	protein_coding	12.7029	-2.47626	0.832703
AT1G07120	protein_coding	13.9773	3.48503	0.833835
AT3G17710	protein_coding	26.1715	2.85672	0.833881
AT1G02813	protein_coding	664.493	2.02468	0.834725
AT3G19330	protein_coding	21.3964	-2.74815	0.838738
AT2G29090	protein_coding	43.9673	-2.75842	0.839323
AT5G45350	protein_coding	1901.76	1.30474	0.839323
AT1TE44905	Transposable_element	24.1564	-2.80863	0.840496
AT5TE43400	Transposable_element	11.9006	-3.20639	0.840496
AT1G53100	protein_coding	14.433	3.17598	0.843994
AT3G45460	protein_coding	5.24785	3.47579	0.845694
AT4TE33010	Transposable_element	50.4812	-2.0777	0.846081
AT5G49110	protein_coding	34.9413	-2.84191	0.846081
AT5G58790	protein_coding	40.9094	-1.9146	0.846081
AT5TE46840	Transposable_element	168.745	-1.60803	0.846081
AT1TE46235	Transposable_element	49.8607	-2.95098	0.846807
AT1G25240	protein_coding	68.2796	-3.02056	0.847312
AT1TE46785	Transposable_element	23.1401	-2.76036	0.847312
AT5G17800	protein_coding	39.7007	2.46754	0.849618
AT2G07213	other_rna	187.2	-1.56746	0.850313
AT2G27315	protein_coding	98.1885	2.75722	0.850313
AT3G06560	protein_coding	19.6584	-3.29604	0.85089
AT3TE63035	Transposable_element	45.9002	-2.58786	0.85089
AT2G07719	protein_coding	387.416	-2.71006	0.852265
AT2G22340	protein_coding	22.2058	-3.23048	0.852265
AT4TE09610	Transposable_element	4.31617	-3.53502	0.852265
AT3G49601	protein_coding	473.097	-1.34963	0.853503
AT4G05440	protein_coding	222.641	1.81074	0.853503
AT5G17370	protein_coding	44.0419	2.49357	0.853503
AT4G20160	protein_coding	24.424	-3.30356	0.854926
AT4G13495	other_rna	47.766	-2.48492	0.857923
AT2G36200	protein_coding	254.957	-1.5629	0.85795
ATCG00060	pre_trna	9.22484	-3.49744	0.86279
AT1G33340	protein_coding	2.77459	3.47755	0.863943
AT3G22850	protein_coding	360.159	1.58286	0.864806
AT1G09410	protein_coding	11.9877	-3.01652	0.866821
AT2TE18450	Transposable_element	264.928	-2.01298	0.866821
AT2G26840	protein_coding	94.4925	1.66922	0.868119
AT2TE15490	Transposable_element	63.353	-2.18573	0.868119
AT5G46990	protein_coding	22.632	3.14789	0.873827
AT1G23250	protein_coding	40.8645	-2.7367	0.878063
AT1G55040	protein_coding	65.381	-1.94188	0.8804
AT5G03080	protein_coding	353.726	1.43076	0.881015
AT4TE33075	Transposable_element	16.8962	3.71359	0.882161
AT5G07010	protein_coding	81.9773	3.11249	0.882962
AT2TE10265	Transposable_element	9.5945	-3.2619	0.88645
AT3G07195	protein_coding	7.013	3.59796	0.88645
AT4G39070	protein_coding	33.3874	2.56187	0.891263
AT1G01040	protein_coding	353.298	-1.5538	0.892587
AT4G36770	protein_coding	26.6593	2.66633	0.892587
AT4G35800	protein_coding	1181.05	-1.54312	0.892623
AT5G66080	protein_coding	65.9502	2.57591	0.892623
AT1TE35540	Transposable_element	43.7254	-2.56496	0.894282
AT5G32072	pseudogene	5.18399	-3.67441	0.896177
AT4G37580	protein_coding	27.0127	2.16963	0.899358
AT1G16390	protein_coding	12.612	3.25948	0.904255
AT1G14642	protein_coding	6.12426	-3.51018	0.908581
AT5TE43810	Transposable_element	6.08275	-3.45393	0.908581
AT2TE16580	Transposable_element	131.51	-2.0237	0.909641
AT2G46200	protein_coding	95.7719	-1.75012	0.910465
AT5G19650	protein_coding	10.9207	2.99348	0.910465
AT3G47890	protein_coding	303.262	-1.74781	0.910655
AT2TE11355	Transposable_element	102.405	-2.29444	0.912608
AT1G64720	protein_coding	1322.75	-1.44779	0.915598
AT5G63010	protein_coding	55.8971	2.04171	0.915598
AT2G03150	protein_coding	534.01	-1.50912	0.917469
AT3G16710	protein_coding	18.7826	-3.22469	0.918768
AT3G10460	protein_coding	195.518	1.90189	0.920095
AT3TE50560	Transposable_element	27.359	-2.96688	0.920095
AT4TE17500	Transposable_element	60.9082	-2.09788	0.920095
AT5TE42330	Transposable_element	90.1193	-1.77527	0.920351
AT2G35215	protein_coding	15.5581	3.20828	0.923602
AT4G14370	protein_coding	6.23603	3.35667	0.923602
AT4TE09175	Transposable_element	112.39	-1.71363	0.927659
AT1G67250	protein_coding	569.507	1.50209	0.927846
AT1G04390	protein_coding	72.0934	-2.48057	0.930553
AT1G04900	protein_coding	136.528	-1.50924	0.930553
AT2G05914	other_rna	963.699	-1.44001	0.930553
AT2G22400	protein_coding	654.483	-1.42907	0.930553
AT3G60176	other_rna	6.29738	-3.23573	0.930553
AT3G61760	protein_coding	33.0746	2.89111	0.930553
AT5G14130	protein_coding	13.0042	3.36158	0.930553
AT5TE63155	Transposable_element	25.972	3.39257	0.930832
AT1G56553	protein_coding	48.3056	3.15408	0.939842
AT5G39310	protein_coding	41.5442	2.89451	0.939842
AT2G36730	protein_coding	24.9335	-2.27739	0.942945
AT2TE41170	Transposable_element	41.3156	-2.08864	0.942945
AT1G70170	protein_coding	20.1709	-3.31539	0.942984
AT1TE07050	Transposable_element	9.27661	-2.79002	0.943024
AT2G12465	protein_coding	14.9809	-3.61036	0.948796
AT3G26125	protein_coding	468.073	1.83812	0.948796
AT2G40960	protein_coding	63.6733	-2.01636	0.949563
AT3G51710	protein_coding	21.5071	-2.37059	0.94982
AT5G13990	protein_coding	52.1603	2.54923	0.95114
AT5G22640	protein_coding	1173.91	-1.22614	0.95114
AT5G59490	protein_coding	7.65461	3.32923	0.95114
AT2G06570	protein_coding	7.67555	-3.66327	0.951591
AT1G34800	protein_coding	7.87461	-3.60035	0.952257
AT2G40995	protein_coding	20.171	3.36148	0.952257
AT3G42723	protein_coding	36.9669	-2.54392	0.952257
AT3G54880	protein_coding	148.521	-1.73205	0.952257
AT4G08869	protein_coding	39.2081	3.32519	0.952257
AT4G17150	protein_coding	184.575	-1.71879	0.952257
AT4TE23715	Transposable_element	39.2081	3.32519	0.952257
AT5G43513	protein_coding	26.1609	3.37279	0.952257
AT5TE92340	Transposable_element	11.1054	-3.42329	0.952257
AT5TE93215	Transposable_element	101.261	2.40925	0.952257
AT1TE49330	Transposable_element	12.3127	-3.58931	0.952426
AT2TE15035	Transposable_element	11.0784	-3.04222	0.952426
AT1G65310	protein_coding	6.08735	-3.49872	0.952529
AT2TE26685	Transposable_element	10.2079	-3.25114	0.95322
AT1G13410	protein_coding	19.692	-3.26236	0.954139
AT1G31820	protein_coding	35.9808	2.37416	0.954139
AT3G11825	protein_coding	60.0039	2.62459	0.954139
AT1G49270	protein_coding	31.7917	-3.15881	0.955855
AT2TE00095	Transposable_element	15.0747	-3.49607	0.956487
AT1G02510	protein_coding	7.83181	3.10574	0.958315
ATCG00200	pre_trna	242.11	-2.58292	0.961079
AT2TE26360	Transposable_element	44.2231	-2.31577	0.963658
AT1TE91365	Transposable_element	44.706	-2.10498	0.964075
AT5G59910	protein_coding	15751.9	1.25323	0.964857
AT3G10116	protein_coding	9.93188	3.30287	0.96602
AT1G20691	other_rna	142.027	-1.70721	0.96625
AT1TE48720	Transposable_element	41.4541	-2.36948	0.967424
AT5G52990	protein_coding	89.2704	1.88279	0.967884
AT3G21800	protein_coding	9.86989	3.09064	0.968488
AT3G06545	protein_coding	6.33003	3.24734	0.971404
AT3G09380	protein_coding	6.75392	3.43147	0.971404
AT5G41040	protein_coding	16.6474	3.09303	0.971404
AT1G02530	protein_coding	31.6635	-2.41238	0.973285
AT3G56290	protein_coding	108.663	-1.85938	0.973285
AT1G43260	protein_coding	7.54366	-2.93643	0.978731
AT3G50380	protein_coding	440.668	-1.99749	0.979593
AT4G21780	protein_coding	8.03487	3.07744	0.979593
AT2G19440	protein_coding	8.03403	3.22625	0.979679
AT3TE59105	Transposable_element	59.288	-2.09291	0.979679
AT1TE51820	Transposable_element	187.872	-2.48092	0.981603
AT1G20515	other_rna	8.96626	-3.11113	0.992541
AT1G61400	protein_coding	10.5532	-3.26608	0.992541
AT2G45380	protein_coding	433.043	-1.4904	0.992541
AT5TE42145	Transposable_element	6.60605	-3.51786	0.992541
AT2G46250	protein_coding	96.6323	-1.75416	0.995921
AT1TE39515	Transposable_element	417.506	-1.56259	0.997854
AT5G17165	protein_coding	43.9927	-2.2558	0.99983
AT1G01010	protein_coding	32.7247	1.06519	1
AT1G01020	protein_coding	97.8369	-0.636682	1
AT1G01030	protein_coding	100.802	-0.434231	1
AT1G01046	mirna	2.47432	0	1
AT1G01050	protein_coding	707.933	-0.0687613	1
AT1G01060	protein_coding	889.032	-1.10714	1
AT1G01070	protein_coding	42.8789	0.924731	1
AT1G01080	protein_coding	276.226	0.586934	1
AT1G01090	protein_coding	1274.68	-0.017136	1
AT1G01100	protein_coding	14744.8	0.676518	1
AT1G01110	protein_coding	173.748	-0.00245957	1
AT1G01120	protein_coding	876.109	0.252683	1
AT1G01130	protein_coding	59.9724	0.940351	1
AT1G01140	protein_coding	465.163	0.816743	1
AT1G01160	protein_coding	344.478	-0.26991	1
AT1G01170	protein_coding	595.763	0.309995	1
AT1G01180	protein_coding	9.35393	1.57031	1
AT1G01200	protein_coding	31.1443	1.24507	1
AT1G01210	protein_coding	86.7026	-0.462011	1
AT1G01220	protein_coding	173.871	-0.653176	1
AT1G01225	protein_coding	47.5172	0.829652	1
AT1G01230	protein_coding	241.415	0.997578	1
AT1G01240	protein_coding	657.95	-0.100604	1
AT1G01250	protein_coding	1012.96	0.717423	1
AT1G01260	protein_coding	150.176	0.260008	1
AT1G01280	protein_coding	164.672	0.763242	1
AT1G01290	protein_coding	157.11	0.361181	1
AT1G01300	protein_coding	1136.28	0.0127726	1
AT1G01305	protein_coding	20.223	0.701186	1
AT1G01310	protein_coding	114.67	0.505816	1
AT1G01340	protein_coding	12.6856	-3.17244	1
AT1G01350	protein_coding	149.808	0.392938	1
AT1G01360	protein_coding	140.96	0.380038	1
AT1G01370	protein_coding	147.308	-0.124904	1
AT1G01380	protein_coding	4.78883	0.31229	1
AT1G01390	protein_coding	3.60145	-0.979178	1
AT1G01420	protein_coding	7.9328	-1.02492	1
AT1G01430	protein_coding	351.635	0.581578	1
AT1G01440	protein_coding	91.0295	0.411147	1
AT1G01460	protein_coding	37.1874	-2.13717	1
AT1G01470	protein_coding	477.207	1.15258	1
AT1G01480	protein_coding	37.7809	1.95602	1
AT1G01490	protein_coding	494.601	0.281108	1
AT1G01500	protein_coding	344.108	0.0165018	1
AT1G01510	protein_coding	617.447	-0.239522	1
AT1G01520	protein_coding	2.64817	0	1
AT1G01530	protein_coding	2.4114	1.42521	1
AT1G01540	protein_coding	559.841	-1.16062	1
AT1G01550	protein_coding	1982.74	0.57411	1
AT1G01560	protein_coding	25.2144	-0.194884	1
AT1G01570	protein_coding	33.5682	1.75818	1
AT1G01580	protein_coding	51.3064	0.334266	1
AT1G01590	protein_coding	49.4413	-1.5989	1
AT1G01600	protein_coding	747.106	0.502802	1
AT1G01610	protein_coding	626.095	0.232137	1
AT1G01620	protein_coding	4868.13	0.394689	1
AT1G01630	protein_coding	556.292	0.740223	1
AT1G01640	protein_coding	41.2682	-1.0901	1
AT1G01650	protein_coding	311.001	0.0564341	1
AT1G01660	protein_coding	7.18329	-2.18046	1
AT1G01670	protein_coding	21.3981	-2.77581	1
AT1G01680	protein_coding	4.08993	-3.18622	1
AT1G01690	protein_coding	74.5036	-0.503451	1
AT1G01695	protein_coding	4.14926	-1.56464	1
AT1G01700	protein_coding	8.27585	0.19301	1
AT1G01710	protein_coding	279.829	-0.775258	1
AT1G01720	protein_coding	486.627	-0.0822188	1
AT1G01725	protein_coding	81.3209	-0.74726	1
AT1G01730	protein_coding	250.49	-0.273497	1
AT1G01740	protein_coding	29.3691	0.105111	1
AT1G01750	protein_coding	37.0123	0.111621	1
AT1G01760	protein_coding	27.0861	0.282185	1
AT1G01770	protein_coding	139.581	-0.338637	1
AT1G01780	protein_coding	253.229	-0.247801	1
AT1G01790	protein_coding	456.775	-0.736794	1
AT1G01800	protein_coding	640.11	0.629896	1
AT1G01810	protein_coding	14.446	1.02274	1
AT1G01820	protein_coding	582.511	-0.198772	1
AT1G01830	protein_coding	295.481	0.23951	1
AT1G01840	protein_coding	22.9265	1.60853	1
AT1G01860	protein_coding	70.4532	0.349741	1
AT1G01880	protein_coding	66.9478	-0.969968	1
AT1G01900	protein_coding	208.413	0.160049	1
AT1G01910	protein_coding	1043.89	0.513627	1
AT1G01920	protein_coding	148.795	-0.643295	1
AT1G01930	protein_coding	84.4308	-1.11535	1
AT1G01940	protein_coding	145.031	-0.144611	1
AT1G01950	protein_coding	239.859	-1.3863	1
AT1G01960	protein_coding	859.804	-0.00462494	1
AT1G01970	protein_coding	310.424	-0.128767	1
AT1G01980	protein_coding	133.773	-1.49551	1
AT1G02000	protein_coding	234.367	-0.54333	1
AT1G02010	protein_coding	132.998	-0.556252	1
AT1G02020	protein_coding	82.2236	0.61453	1
AT1G02030	protein_coding	4.94836	-1.13939	1
AT1G02040	protein_coding	77.7663	1.00072	1
AT1G02050	protein_coding	333.468	0.63279	1
AT1G02060	protein_coding	26.403	-2.44995	1
AT1G02065	protein_coding	264.979	-0.95518	1
AT1G02070	protein_coding	71.7722	-0.214023	1
AT1G02080	protein_coding	1285.47	-1.09699	1
AT1G02090	protein_coding	477.416	0.199025	1
AT1G02100	protein_coding	290.701	-0.183524	1
AT1G02120	protein_coding	305.536	-1.06322	1
AT1G02130	protein_coding	954.185	0.175756	1
AT1G02140	protein_coding	616.715	0.699616	1
AT1G02145	protein_coding	197.3	-0.0485321	1
AT1G02150	protein_coding	503.835	-0.0259906	1
AT1G02160	protein_coding	375.918	-0.620042	1
AT1G02170	protein_coding	175.156	0.500601	1
AT1G02180	protein_coding	170.7	1.42044	1
AT1G02190	protein_coding	829.288	-1.53911	1
AT1G02205	protein_coding	4900.3	-0.780619	1
AT1G02220	protein_coding	16.4069	-1.94059	1
AT1G02260	protein_coding	89.0764	-0.31715	1
AT1G02270	protein_coding	180.614	-0.123617	1
AT1G02280	protein_coding	644.102	-0.279103	1
AT1G02290	protein_coding	120.308	0.440424	1
AT1G02305	protein_coding	1353.7	0.582029	1
AT1G02310	protein_coding	17.4775	-1.37894	1
AT1G02330	protein_coding	170.234	0.220171	1
AT1G02335	protein_coding	303.436	1.29451	1
AT1G02340	protein_coding	95.6963	0.393691	1
AT1G02350	protein_coding	11.8574	-2.60404	1
AT1G02370	protein_coding	117.434	-0.472118	1
AT1G02380	protein_coding	32.5028	1.03185	1
AT1G02390	protein_coding	40.8975	2.73116	1
AT1G02400	protein_coding	14.9649	1.81243	1
AT1G02405	protein_coding	6.21347	-0.438813	1
AT1G02410	protein_coding	118.322	0.0942973	1
AT1G02420	protein_coding	25.6936	-1.83223	1
AT1G02430	protein_coding	2.74537	1.66035	1
AT1G02450	protein_coding	115.048	0.822083	1
AT1G02460	protein_coding	27.413	-0.00850383	1
AT1G02470	protein_coding	242.283	1.2938	1
AT1G02475	protein_coding	329.631	0.772663	1
AT1G02500	protein_coding	1843.14	-0.818525	1
AT1G02520	protein_coding	54.8179	-0.789026	1
AT1G02560	protein_coding	1640	0.401478	1
AT1G02580	protein_coding	5.57323	0.572426	1
AT1G02610	protein_coding	47.45	-0.765548	1
AT1G02630	protein_coding	68.4212	0.200561	1
AT1G02640	protein_coding	229.955	0.353094	1
AT1G02650	protein_coding	10.0586	-0.158668	1
AT1G02660	protein_coding	632.056	0.19184	1
AT1G02670	protein_coding	34.1635	1.51232	1
AT1G02680	protein_coding	119.365	0.372511	1
AT1G02690	protein_coding	262.197	1.06797	1
AT1G02720	protein_coding	129.884	-1.44874	1
AT1G02730	protein_coding	1587.45	0.028229	1
AT1G02740	protein_coding	125.676	-0.376357	1
AT1G02750	protein_coding	123.374	1.22813	1
AT1G02770	protein_coding	27.3081	0.580013	1
AT1G02780	protein_coding	13111.2	0.0556653	1
AT1G02790	protein_coding	2840.53	-1.15489	1
AT1G02800	protein_coding	198.451	-0.167387	1
AT1G02810	protein_coding	97.8165	0.706599	1
AT1G02816	protein_coding	292.925	0.900333	1
AT1G02820	protein_coding	58.5005	-0.699211	1
AT1G02840	protein_coding	641.429	-0.217653	1
AT1G02850	protein_coding	429.017	-0.146298	1
AT1G02860	protein_coding	148.94	0.550601	1
AT1G02870	protein_coding	271.412	-0.282105	1
AT1G02880	protein_coding	192.925	-0.498691	1
AT1G02890	protein_coding	432.737	-0.600294	1
AT1G02900	protein_coding	60.4378	1.18932	1
AT1G02910	protein_coding	203.498	-0.653082	1
AT1G02920	protein_coding	14.7248	0.423151	1
AT1G02930	protein_coding	498.4	0.907299	1
AT1G02940	protein_coding	5.65316	1.96111	1
AT1G02950	protein_coding	187.379	0.907603	1
AT1G02960	protein_coding	91.0715	0.902783	1
AT1G02970	protein_coding	32.8037	0.24262	1
AT1G02980	protein_coding	10.6984	1.28788	1
AT1G02990	protein_coding	216.749	-1.27298	1
AT1G03000	protein_coding	157.057	-0.5719	1
AT1G03010	protein_coding	22.3924	-0.585918	1
AT1G03030	protein_coding	115.824	1.06317	1
AT1G03040	protein_coding	674.769	0.51458	1
AT1G03050	protein_coding	263.143	-1.90539	1
AT1G03055	protein_coding	9.83869	0.796646	1
AT1G03060	protein_coding	755.175	-1.4605	1
AT1G03070	protein_coding	56.3359	1.6949	1
AT1G03080	protein_coding	943.977	-1.14292	1
AT1G03090	protein_coding	172.048	-0.296908	1
AT1G03100	protein_coding	24.6623	0.0244054	1
AT1G03110	protein_coding	151.548	-0.53451	1
AT1G03120	protein_coding	16.5603	-0.387259	1
AT1G03130	protein_coding	2273.45	0.735079	1
AT1G03140	protein_coding	426.767	0.124426	1
AT1G03150	protein_coding	180.698	0.45158	1
AT1G03160	protein_coding	274.083	0.398512	1
AT1G03170	protein_coding	429.269	0.943438	1
AT1G03180	protein_coding	30.101	-0.103064	1
AT1G03190	protein_coding	125.306	0.00275413	1
AT1G03200	protein_coding	8.7167	0	1
AT1G03210	protein_coding	84.255	0.205322	1
AT1G03220	protein_coding	238.69	0.0971599	1
AT1G03230	protein_coding	161.881	0.115715	1
AT1G03250	protein_coding	410.562	0.253736	1
AT1G03260	protein_coding	75.8097	-0.10319	1
AT1G03270	protein_coding	52.9353	0.829319	1
AT1G03280	protein_coding	219.046	-0.273734	1
AT1G03290	protein_coding	307.97	-0.492429	1
AT1G03300	protein_coding	51.6112	-0.611792	1
AT1G03310	protein_coding	417.53	-0.381839	1
AT1G03330	protein_coding	701.136	0.308653	1
AT1G03340	protein_coding	36.1324	0.697753	1
AT1G03350	protein_coding	1048.06	-0.343495	1
AT1G03360	protein_coding	181.803	1.13946	1
AT1G03365	protein_coding	186.416	-0.986949	1
AT1G03370	protein_coding	144.145	0.545701	1
AT1G03380	protein_coding	308.325	1.04504	1
AT1G03390	protein_coding	38.2581	1.86798	1
AT1G03400	protein_coding	64.3662	0.255497	1
AT1G03410	protein_coding	84.8636	-0.783644	1
AT1G03430	protein_coding	166.597	-0.513718	1
AT1G03440	protein_coding	84.6607	-0.181257	1
AT1G03457	protein_coding	65.3758	-0.00472154	1
AT1G03470	protein_coding	133.012	0.464888	1
AT1G03475	protein_coding	1104.4	0.477334	1
AT1G03495	protein_coding	6.78506	-1.01241	1
AT1G03502	small_nucleolar_rna	7.10306	-3.10889	1
AT1G03510	protein_coding	19.5111	2.59582	1
AT1G03520	protein_coding	97.6817	0.317993	1
AT1G03530	protein_coding	180.462	-1.04801	1
AT1G03540	protein_coding	21.4133	-1.85944	1
AT1G03545	other_rna	23.3078	1.75151	1
AT1G03550	protein_coding	51.0445	0.0327015	1
AT1G03560	protein_coding	56.8024	-0.47553	1
AT1G03590	protein_coding	382.803	-0.38769	1
AT1G03600	protein_coding	827.978	0.962942	1
AT1G03610	protein_coding	360.863	-0.0874523	1
AT1G03620	protein_coding	17.1632	-2.59241	1
AT1G03630	protein_coding	1493.81	0.71142	1
AT1G03650	protein_coding	24.6033	-0.288209	1
AT1G03660	protein_coding	26.4098	0.319488	1
AT1G03680	protein_coding	1860.21	0.451439	1
AT1G03687	protein_coding	65.1163	-0.605516	1
AT1G03700	protein_coding	8.12397	1.274	1
AT1G03710	protein_coding	373.566	0.077376	1
AT1G03720	protein_coding	5.26122	0	1
AT1G03730	protein_coding	382.119	0.970906	1
AT1G03740	protein_coding	158.63	-0.0961814	1
AT1G03743	small_nucleolar_rna	14.4388	-3.11459	1
AT1G03750	protein_coding	86.3093	-0.865719	1
AT1G03760	protein_coding	83.8536	0.815555	1
AT1G03770	protein_coding	58.6148	2.09307	1
AT1G03780	protein_coding	255.858	-1.03948	1
AT1G03800	protein_coding	3.21258	-0.338422	1
AT1G03820	protein_coding	219.04	1.34659	1
AT1G03830	protein_coding	154.351	-0.266277	1
AT1G03840	protein_coding	28.6265	-0.131625	1
AT1G03850	protein_coding	76.63	-0.655924	1
AT1G03860	protein_coding	672.131	0.300494	1
AT1G03870	protein_coding	568.626	1.19115	1
AT1G03900	protein_coding	829.578	0.0562404	1
AT1G03905	protein_coding	32.6047	-0.658448	1
AT1G03910	protein_coding	424.525	-0.854193	1
AT1G03920	protein_coding	31.1516	-0.721574	1
AT1G03930	protein_coding	132.374	-0.738687	1
AT1G03940	protein_coding	13.1877	0.912235	1
AT1G03950	protein_coding	89.9371	1.49653	1
AT1G03960	protein_coding	107.402	-1.3238	1
AT1G03970	protein_coding	192.677	0.393623	1
AT1G03980	protein_coding	3.31187	0.471588	1
AT1G03990	protein_coding	4.05954	0	1
AT1G04000	protein_coding	178.538	-1.47095	1
AT1G04010	protein_coding	76.7567	-0.888917	1
AT1G04020	protein_coding	118.043	-0.103821	1
AT1G04030	protein_coding	108.61	-0.721288	1
AT1G04040	protein_coding	111.081	-0.485535	1
AT1G04050	protein_coding	86.1694	-0.241412	1
AT1G04070	protein_coding	245.77	0.0563573	1
AT1G04080	protein_coding	998.422	-0.538857	1
AT1G04090	protein_coding	18.1307	-0.950617	1
AT1G04100	protein_coding	39.4639	0.431248	1
AT1G04110	protein_coding	41.9822	-0.121574	1
AT1G04130	protein_coding	134.172	-0.232494	1
AT1G04140	protein_coding	694.547	-0.056401	1
AT1G04150	protein_coding	12.8111	0.0589821	1
AT1G04160	protein_coding	91.5973	-1.79966	1
AT1G04170	protein_coding	1633.02	0.0347982	1
AT1G04190	protein_coding	357.008	0.802362	1
AT1G04200	protein_coding	224.867	0.0760562	1
AT1G04210	protein_coding	468.582	-0.270375	1
AT1G04220	protein_coding	535.343	0.288824	1
AT1G04230	protein_coding	76.0324	1.94995	1
AT1G04240	protein_coding	360.202	0.882473	1
AT1G04250	protein_coding	423.334	0.693849	1
AT1G04260	protein_coding	598.384	1.0525	1
AT1G04270	protein_coding	14052.7	0.611912	1
AT1G04280	protein_coding	93.3108	-0.612383	1
AT1G04290	protein_coding	366.158	-0.0611482	1
AT1G04295	other_rna	8.79634	0.154391	1
AT1G04300	protein_coding	396.841	-0.867335	1
AT1G04310	protein_coding	180.803	-0.656761	1
AT1G04330	protein_coding	4.66085	0	1
AT1G04340	protein_coding	517.671	0.905483	1
AT1G04350	protein_coding	211.64	-0.176728	1
AT1G04360	protein_coding	6.98262	2.59421	1
AT1G04380	protein_coding	2.6359	0.577488	1
AT1G04400	protein_coding	1176.12	0.0792252	1
AT1G04410	protein_coding	7464.47	0.719551	1
AT1G04420	protein_coding	360.693	-0.426246	1
AT1G04430	protein_coding	722.397	-0.467512	1
AT1G04440	protein_coding	268.895	-0.303012	1
AT1G04450	protein_coding	18.7312	0.889815	1
AT1G04470	protein_coding	160.742	-0.676853	1
AT1G04480	protein_coding	2415.87	-0.0985823	1
AT1G04490	protein_coding	6.94482	0.239487	1
AT1G04500	protein_coding	25.0683	-0.481957	1
AT1G04510	protein_coding	792.492	0.732504	1
AT1G04520	protein_coding	200.475	-0.135087	1
AT1G04530	protein_coding	452.838	0.499117	1
AT1G04540	protein_coding	98.674	-1.57653	1
AT1G04550	protein_coding	603.276	0.130099	1
AT1G04555	protein_coding	44.8021	-0.144172	1
AT1G04570	protein_coding	35.8618	-2.53726	1
AT1G04580	protein_coding	103.51	-0.128335	1
AT1G04590	protein_coding	136.77	-0.0943559	1
AT1G04600	protein_coding	33.5285	0.514155	1
AT1G04610	protein_coding	20.4717	-1.25504	1
AT1G04620	protein_coding	154.65	1.08464	1
AT1G04625	protein_coding	747.546	0.947529	1
AT1G04630	protein_coding	1175.77	1.07296	1
AT1G04635	protein_coding	27.5413	0.898165	1
AT1G04640	protein_coding	255.959	-0.0181978	1
AT1G04645	protein_coding	14.9768	2.22988	1
AT1G04650	protein_coding	37.4906	0.0651937	1
AT1G04660	protein_coding	296.611	-0.0648313	1
AT1G04670	protein_coding	71.9784	1.0496	1
AT1G04680	protein_coding	2339.83	-0.0368264	1
AT1G04690	protein_coding	1227.32	0.898914	1
AT1G04700	protein_coding	79.4915	-0.766789	1
AT1G04710	protein_coding	168.813	0.590743	1
AT1G04730	protein_coding	80.2925	-0.779216	1
AT1G04750	protein_coding	2473.58	0.0747242	1
AT1G04770	protein_coding	518.331	-0.161997	1
AT1G04778	protein_coding	4.34333	1.10115	1
AT1G04780	protein_coding	418.464	0.0188648	1
AT1G04790	protein_coding	270.912	-0.533657	1
AT1G04800	protein_coding	412.197	-0.066109	1
AT1G04810	protein_coding	444.442	-0.988	1
AT1G04820	protein_coding	15281.8	0.139832	1
AT1G04830	protein_coding	123.427	0.327901	1
AT1G04840	protein_coding	17.0381	3.0491	1
AT1G04850	protein_coding	799.447	-0.41083	1
AT1G04860	protein_coding	215.784	0.538156	1
AT1G04870	protein_coding	213.132	0.662871	1
AT1G04880	protein_coding	30.6302	1.06186	1
AT1G04890	protein_coding	27.4155	-0.353924	1
AT1G04910	protein_coding	219.848	-0.487537	1
AT1G04920	protein_coding	61.406	0.159457	1
AT1G04930	protein_coding	100.621	0.0528769	1
AT1G04940	protein_coding	219.921	1.77848	1
AT1G04945	protein_coding	306.91	0.214304	1
AT1G04950	protein_coding	259.202	-0.32075	1
AT1G04960	protein_coding	234.081	1.40302	1
AT1G04970	protein_coding	223.759	-0.15108	1
AT1G04980	protein_coding	129.656	0.993004	1
AT1G04985	protein_coding	122.187	-0.875496	1
AT1G04990	protein_coding	211.478	1.07648	1
AT1G05000	protein_coding	29.5707	1.0228	1
AT1G05010	protein_coding	238.69	1.28373	1
AT1G05020	protein_coding	20.4447	-0.785917	1
AT1G05030	protein_coding	81.8424	-0.556601	1
AT1G05040	protein_coding	6.88376	-2.86011	1
AT1G05055	protein_coding	83.7589	1.28838	1
AT1G05060	protein_coding	110.349	0.0374248	1
AT1G05061	pseudogene	3.14697	0	1
AT1G05065	protein_coding	6.25529	0.527366	1
AT1G05070	protein_coding	135.014	0.0150268	1
AT1G05090	protein_coding	169.956	-0.952153	1
AT1G05100	protein_coding	93.987	-1.52935	1
AT1G05120	protein_coding	358.232	0.0423797	1
AT1G05135	pseudogene	675.371	-1.37984	1
AT1G05140	protein_coding	301.953	-0.516596	1
AT1G05150	protein_coding	423.217	0.418662	1
AT1G05160	protein_coding	108.135	-1.76848	1
AT1G05170	protein_coding	144.3	-0.456278	1
AT1G05180	protein_coding	258.347	0.188408	1
AT1G05190	protein_coding	1769.19	-0.0727737	1
AT1G05200	protein_coding	131.189	-0.847502	1
AT1G05205	protein_coding	179.343	-0.0758307	1
AT1G05210	protein_coding	238.071	0.204445	1
AT1G05230	protein_coding	124.748	0.52109	1
AT1G05260	protein_coding	88.8107	1.22961	1
AT1G05270	protein_coding	173.524	0.587981	1
AT1G05290	protein_coding	4.64271	1.32491	1
AT1G05300	protein_coding	18.4955	-1.57172	1
AT1G05310	protein_coding	21.9603	1.13765	1
AT1G05320	protein_coding	282.985	0.277942	1
AT1G05330	protein_coding	5.43728	2.75025	1
AT1G05340	protein_coding	381.84	0.885182	1
AT1G05350	protein_coding	134.08	0.504254	1
AT1G05360	protein_coding	114.914	-1.126	1
AT1G05370	protein_coding	13.4142	2.21244	1
AT1G05380	protein_coding	402.314	-0.946661	1
AT1G05385	protein_coding	129.332	0.538852	1
AT1G05400	protein_coding	5.40743	1.12163	1
AT1G05410	protein_coding	122.996	-0.54438	1
AT1G05420	protein_coding	17.2706	1.291	1
AT1G05430	protein_coding	228.418	-0.364804	1
AT1G05440	protein_coding	76.6756	0.307745	1
AT1G05450	protein_coding	144.368	0.147338	1
AT1G05470	protein_coding	133.905	-0.69428	1
AT1G05490	protein_coding	475.049	-1.15213	1
AT1G05500	protein_coding	326.116	-0.209952	1
AT1G05520	protein_coding	369.228	-1.38296	1
AT1G05540	protein_coding	314.375	-0.534166	1
AT1G05550	protein_coding	121.634	-0.165543	1
AT1G05560	protein_coding	149.625	-0.375738	1
AT1G05562	other_rna	40.7425	-0.853231	1
AT1G05575	protein_coding	19.0449	-0.474488	1
AT1G05577	protein_coding	28.218	-0.222029	1
AT1G05580	protein_coding	288.157	-1.04011	1
AT1G05590	protein_coding	175.151	-0.0339673	1
AT1G05600	protein_coding	97.6752	0.0253779	1
AT1G05610	protein_coding	5.26542	0.515442	1
AT1G05620	protein_coding	402.356	0.248065	1
AT1G05630	protein_coding	134.762	-1.70216	1
AT1G05640	protein_coding	45.9794	-0.643385	1
AT1G05670	protein_coding	49.7128	-1.1995	1
AT1G05675	protein_coding	15.666	-0.14165	1
AT1G05680	protein_coding	181.568	0.920028	1
AT1G05690	protein_coding	14.7256	-0.346712	1
AT1G05710	protein_coding	232.485	0.10006	1
AT1G05720	protein_coding	376.169	0.332163	1
AT1G05730	protein_coding	43.6247	-0.0404555	1
AT1G05750	protein_coding	63.2873	0.458671	1
AT1G05760	protein_coding	33.4644	-0.365661	1
AT1G05770	protein_coding	9.47593	2.16864	1
AT1G05780	protein_coding	48.0629	-1.89551	1
AT1G05785	protein_coding	91.3452	1.37669	1
AT1G05805	protein_coding	211.15	0.235656	1
AT1G05810	protein_coding	33.3958	-0.649612	1
AT1G05835	protein_coding	538.053	-0.427403	1
AT1G05840	protein_coding	217.044	0.261796	1
AT1G05850	protein_coding	6943.66	0.189681	1
AT1G05860	protein_coding	64.7403	-0.0923648	1
AT1G05870	protein_coding	244.523	0.747417	1
AT1G05890	protein_coding	385.997	-0.282688	1
AT1G05900	protein_coding	71.4154	0.842393	1
AT1G05910	protein_coding	273.8	-0.572315	1
AT1G05920	protein_coding	3.3967	0	1
[truncated: 35,730 more rows]
