# Supplementary material for: A genome-wide transcriptome and translatome analysis of Arabidopsis transposons identifies a unique and conserved genome expression strategy for Ty1/Copia retroelements
Source: HighWire-hosted journal article supplement (doi:10.1101/gr.220723.117), 2017-08-07
Supplement: Supplemental_Table_S4.xlsx [file Supplemental_Table_S4.xlsx]

## Sheet: Sheet1
Supplemental Table S4. RNA-seq library statistics.
Numbers of read-pairs generated and subsequently trimmed and mapped per individual library generated for this work.
Background	RNA.type	Library.type	Raw.Reads	Trimmed.Raw.Reads	Mapped.Read.Pairs	Unmapped (too many loci)
Col-0 Rep1	total RNA	TruSeq	67039683	66662959	64979857	2531
Col-0 Rep2	total RNA	TruSeq	77276922	76390559	74446914	3251
ddm1 Rep1	total RNA	TruSeq	74464898	73774140	71609204	1691
ddm1 Rep2	total RNA	TruSeq	68687232	68297145	66143083	816
met1 Rep1	total RNA	TruSeq	61987205	61630917	59285614	2651
met1 Rep2	total RNA	TruSeq	68286578	67769302	64773120	1814
Col-0 Rep1	total RNA	QuantSeq 3'end	13907419	11352408	8375743	143
Col-0 Rep2	total RNA	QuantSeq 3'end	10586907	9416566	6152231	76
ddm1 Rep1	total RNA	QuantSeq 3'end	14231989	11252782	6265430	70
ddm1 Rep2	total RNA	QuantSeq 3'end	8018533	7234629	4074510	50
met1 Rep1	total RNA	QuantSeq 3'end	8799886	7606141	5389452	53
met1 Rep2	total RNA	QuantSeq 3'end	7638587	5897661	3394185	80
Col-0 Rep1	Polyome RNA	QuantSeq 3'end	15281761	14325670	10491229	190
Col-0 Rep2	Polyome RNA	QuantSeq 3'end	13740978	12474416	6922793	91
ddm1 Rep1	Polyome RNA	QuantSeq 3'end	16685964	15294180	8028235	64
ddm1 Rep2	Polyome RNA	QuantSeq 3'end	10242999	9354257	5919797	50
