# Supplementary material for: A genome-wide transcriptome and translatome analysis of Arabidopsis transposons identifies a unique and conserved genome expression strategy for Ty1/Copia retroelements
Source: HighWire-hosted journal article supplement (doi:10.1101/gr.220723.117), 2017-08-07
Supplement: Supplemental_Table_S5.xlsx [file Supplemental_Table_S5.xlsx]

## Sheet: Primers
Supplemental Table 5. Primers used in this work.
List of primers used for generation of northern blot probes, qPCR amplification, plasmid cloning and 3’ RACE.
Northen blot probe primer
3'RACE EVD out	ACACTTGCTTAGGTCGGAGAAG
3'RACE EVD inn	ACCGGGCTATTTGGTGGAAA
Gag probe F	CGGCTAACAAAGGAGAAGTAGTGG
Gag probe R	CGGATTCTTTGAGTGAAGCAATGG
RT probe F	CAAAGACGGTATAGACTCTACCAAGAC
RT probe R	CTCTATACTCCGATTCTGCACTCGAACA
ACT2 probe F	GCACCCTGTTCTTCTTACCG
ACT2 probe R	AACCCTCGTAGATTGGCACA
RT-PCR and qPCR primer
EVD PR flanking F	GACAAATGTTGGTTGCTACATCCACACCTC
EVD PR flanking R	AAAGAGATGCCTAAATGTGACTTAGAGGAA
qLONG_spl_F	TCAAAGAATCCGGATATTGAGAC
qLONG_uspl_F	GATGTGTATTTTCAGGATATTGAGAC
qSHORT_R	TGCCACAAAGTATTAAAAGAGATG
qLONG_R	TCAAACACTCTATCTTTTGAGGGTAA
qGag-F	TTTGACCCGCGTGTTTGAAG
qGag-R	AATCTTCGGGTCAAGCGTTC
qIN-F	CCGGAGAACAAAGAAGCAAGC
qIN-R	AATGTGCGGTTCTTGGTTGG
qRT-F	ACATATGGCTCCGACTACATGG
qRT-R	AGTTCGCCTTGGAGAAATGC
qACT2-F	GCACCCTGTTCTTCTTACCG
qACT2-R	AACCCTCGTAGATTGGCACA
qGAPC-F	ACTCAATCACTGCTACTCAG
qGAPC-R	GTTGGGACACGGAAAGACATTCCA
q u-spl Gag F	GTTGGTTGCTACATCCACACCT
q u-spl Gag R	CAATTGAACTACTAGATGTTTGTGATG
q spl GAG F	GTTGGTTGCTACATCCACACCT
q spl GAG R	TCAATATCCGGATTCTTTGAG
qGFP-F	ACAACATCGAAGACGGCG
qGFP-R	AGGGCAGATTGTGTGGACAGG
qGUS-F	GCACGGGAATATTTCGCGC
qGUS-R	GTATCGGTGTGAGCGTCGC
q18S-F	TAGTTGGTGGAGCGATTTGTCTG
q18S-R	CTAAGCGGCATAGTCCCTCTAAG
cloning primer
EVDattB1	GGGGACAAGTTTGTACAAAAAAGCAGGCTTCATGGAGACTTCTCAAAAGATG
EVDattB2	GGGGACCACTTTGTTACAAGAAAGCTGGGTTTCAAGAGTGAGATCCAC
EVDdI_F	CACTCAAAGAATCCGGATATTGAGACGGGA
EVDdI_R	TCCCGTCTCAATATCCGGATTCTTTGAGTG
EVDmU1_F	CACTCAAAGAATCCAACCTCACTTTCTCATCACAAACATCT
EVDmU1_R	TGAGAAAGTGAGGTTGGATTCTTTGAGTGAAGCAATGGACT
GFP-GUS_mGFP5_F	GGGGACAAGTTTGTACAAAAAAGCAGGCTATGAGTAAAGGAGAAGAACT
GFP-GUS_mGFP5_R	GCTGCAGCTGCAGCTGCAGCTGCAGCTGCCTCGAGTTTGTATAGTTCTACCATGCCATG
GFP-GUS_GUS_F	CAGCTGCAGCTGCAGCTGCAGCTGCAGCTCCTAGGATGTTACGTCCTGTAGAAACCCCA
GFP-GUS_GUS_R	GGGGACCACTTTGTACAAGAAAGCTGGGTTCATTGTTTGCCTCCCTGCT
GFP-GUS_EVD_F	atgatgctcgagGAGACATCCACATCATTCGGAGAC
GFP-GUS_EVD_R	catcatcctaggGACATAGGTTTCAAAGTTAGTGA
3'RACE priner
EVD_out	ACACTTGCTTAGGTCGGAGAAG
EVD_inn	ACCGGGCTATTTGGTGGAAA
Copia1_3'RACE_out	AATCCGACTGCTGCCTTTCAAG
Copia1_3'RACE_inn	CATACAAGAAGCCTAAGTGTTCTTAC
Copia15_3'RACE_out	CCTCAAAGTGATCAGTTTGCAGTG
Copia15_3'RACE_inn	GCTCTCACTGTGGTTATACTGGA
Copia20_3'RACE_out	CCAAATCTTGAGGAAGTATGCTCTC
Copia20_3'RACE_inn	GAGAGCTAGCTTGAGTCAATCTAAG
Copia38B_3'RACE_out	AATGTGGTTGCTCCACCTGC
Copia38B_3'RACE_inn	TTTGCTATGTTCAGAATGGTCCT
Copia72_3'RACE_out	GCTTTTCAAGTCTCTGAGGTATCTC
Copia72_3'RACE_inn	CAAACAAAGGTCGTCCTACGTG
Copia8A_3'RACE_out	AACAGAGGCAGAAACTCATTTAGTAC
Copia8A_3'RACE_inn	CTTCAGGTTCTCAGTCTGGTGG
Copia89_3'RACE_out	TTGCCTTCTTCCTCGACCATG
Copia89_3'RACE_inn	TATGTTCTCATTGTGGCTACACAGG
GFP_out	ACAACATCGAAGACGGCG
GFP_inn	GCTGCTGGGATTACACATGGC
GUS_out	GCACGGGAATATTTCGCGC
